# Supplementary material for: Visible-light-induced chemo-, diastereo- and enantioselective α-C(sp3)–H functionalization of alkyl silanes
Source: Royal Society of Chemistry journal article supplement (doi:10.1039/d3sc00919j), 2023-01-01

## Supporting Information

### Visible-light-induced chemo-, diastereo- and enantioselective $\alpha$ -C(sp<sup>3</sup>)-H functionalization of alkyl silanes

Lili Feng,<sup>1</sup> Xiaofan Chen,<sup>1</sup> Ning Guo,<sup>1</sup> Yuqiao Zhou,<sup>1</sup> Lili Lin,<sup>1</sup> Weidi Cao,<sup>1\*</sup> and Xiaoming Feng<sup>1\*</sup>

<sup>1</sup>Key Laboratory of Green Chemistry & Technology, Ministry of Education, College of Chemistry, Sichuan University, Chengdu 610064, China. China.

\*E-mail: [wcao@scu.edu.cn](mailto:wcao@scu.edu.cn); [xmfeng@scu.edu.cn](mailto:xmfeng@scu.edu.cn)

|                                                                                         |    |
|-----------------------------------------------------------------------------------------|----|
| 1. General remarks .....                                                                | 2  |
| 2. The synthesis of substrates.....                                                     | 3  |
| 2.1 General procedure for the synthesis of <i>N</i> -sulfonyl cyclic ketimines .....    | 3  |
| 2.2 General procedure for the synthesis of alkyl silanes.....                           | 3  |
| 3. General procedure for the preparation of the racemic products .....                  | 6  |
| 4. General procedure for the catalytic asymmetric reactions.....                        | 6  |
| 5. Optimization of the reaction conditions.....                                         | 7  |
| 6. The limited substrate scope.....                                                     | 10 |
| 7. Control experiments.....                                                             | 11 |
| 8. Mechanistic investigations.....                                                      | 11 |
| 8.1 Catalytic reaction interfered with a radical quencher .....                         | 11 |
| 8.2 Detection of the homocoupling product 4a.....                                       | 11 |
| 8.3 EPR studies .....                                                                   | 12 |
| 8.4 Stern-Volmer emission quenching experiments.....                                    | 13 |
| 8.5 Deuterium experiment.....                                                           | 15 |
| 8.6 KIE experiment.....                                                                 | 17 |
| 8.7 Cyclic voltammetry analysis.....                                                    | 18 |
| 8.8 Quantum yield measurement.....                                                      | 20 |
| 8.9 Catalytic cycle.....                                                                | 22 |
| 9. Product derivation.....                                                              | 24 |
| 10. Single-crystal data.....                                                            | 25 |
| 11. References.....                                                                     | 26 |
| 12. Characterization of typical substrates <b>1a-1h</b> .....                           | 27 |
| 13. Copies of NMR spectra and CD spectra for the reaction substrates and products ..... | 55 |

## 1. General remarks

10 W or 20 W blue LEDs (Chinese Taobao, <https://shop112050379.taobao.com>) were used as light sources.  $^1\text{H}$  NMR spectra were recorded on Bruker ASCEND<sup>TM</sup> 400M (400 MHz) or 600M (600 MHz).  $^{13}\text{C}\{^1\text{H}\}$  NMR data were collected on Bruker ASCEND<sup>TM</sup> 400M (101 MHz) or 600M (151 MHz) with complete proton decoupling. Chemical shifts were recorded in ppm relative to tetramethylsilane and with the solvent resonance as the internal standard ( $\text{CDCl}_3$ ,  $\delta = 7.26$ ) for  $^1\text{H}$  NMR and ( $\text{CDCl}_3$ ,  $\delta = 77.0$ ) for  $^{13}\text{C}\{^1\text{H}\}$  NMR. Data were reported as follows: chemical shift, multiplicity (s = singlet, d = doublet, t = triplet, q = quartet, m = multiplet), coupling constants (Hz), integration.  $^{19}\text{F}\{^1\text{H}\}$  NMR spectra were collected on Bruker ASCEND<sup>TM</sup> 400M (376 MHz) with complete proton decoupling. Chemical shifts  $\delta$  are given relative to  $\text{CFCl}_3$  (external reference,  $\delta$   $^{19}\text{F}(\text{CFCl}_3) = 0$ ). Enantiomeric excesses were determined by chiral HPLC analysis on Daicel Chiralcel AD-H or chiral UPC<sup>2</sup> analysis on Phenomenex Chiralcel Lux 5u Cellulose at 35 °C with UV detector at 220 nm in comparison with the authentic racemates. Optical rotations were determined after flash column chromatography purification and reported as follows:  $[\alpha]_{\text{D}}^{\text{T}}$  ( $c$ : g/100 mL, in  $\text{CH}_2\text{Cl}_2$ ). HRMS were recorded on Thermo Q-Exactive Focus (FTMS+ $c$  ESI). IR spectra were recorded on SHIMADZU IR Tracer-100 FT-IR spectrophotometer. Emission intensities were recorded using a F-7000 FL Spectrophotometer. EPR spectra were recorded at room temperature on a Bruker EPR A300. All reactions were performed in sealed oven-dried glass tubes under an atmosphere of nitrogen unless otherwise noted.  $\text{CHCl}_3$  was distilled over  $\text{CaH}_2$ . All the solvents were purified by usual methods before use. Chromatography: Qingdao Haiyang silica gel, HG/T2354-92, HCP. The chiral  $N,N'$ -dioxides were prepared according to methods reported in the literature.<sup>1-3</sup>

## 2. The synthesis of substrates

### 2.1 General procedure for the synthesis of *N*-sulfonyl cyclic ketimines

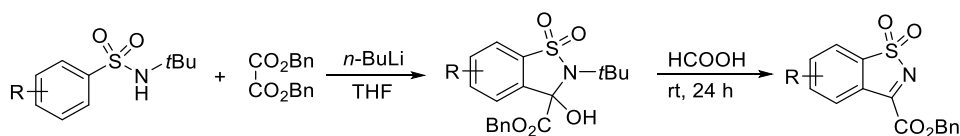

Butyllithium (30.75 mmol, 2 M in THF) was added dropwise over a 20 minutes period to a cold (0 °C), mechanically stirred solution of aryl sulfonamide (15 mmol) in anhydrous tetrahydrofuran (80 mL) under a dry nitrogen atmosphere. The mixture was stirred for an additional 25 min at 0 °C and a precipitate was formed. The suspension was cooled to -78 °C and dibenzyl oxalate (45 mmol) in THF (20 mL) was added dropwise over 10 minutes. The cooling bath was removed and the suspension was stirred at ambient temperature for 2 h. The reaction was quenched with 5% HCl (40 mL) and added to water (200 mL). The organic phase was extracted with ether (3×50 mL). The ether phase was washed with brine (200 mL). The solvent was removed and the crude product was obtained used directly in the next step without further purification. To the crude product obtained above, formic acid (25 mL) was added and the suspension was stirred at room temperature under a dry nitrogen atmosphere. After 5 min dissolution occurred. After 24 h the solution was concentrated and the resultant solid was dissolved in CH<sub>2</sub>Cl<sub>2</sub> and concentrated to remove traces of formic acid. This afforded the title compound as a solid which was further purified by flash chromatography (DCM/PE = 1/2 - DCM).<sup>4</sup>

### 2.2 General procedure for the synthesis of alkyl silanes

#### General procedure I (for **2a**, **2b**, **2c**, **2d**, **2f**, **2h**, **2i**)<sup>5</sup>

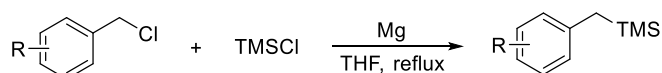

**2a**: R = H; **2b**: R = 3-Me; **2c**: R = 4-Me  
**2d**: R = 4-MeO; **2e**: R = 4-F; **2f**: R = 4-Cl  
**2h**: R = 2-F; **2i**: R = 3-F

A flame-dried, three-neck, round-bottom flask, equipped with a mechanical stirrer, reflux condenser, N<sub>2</sub> inlet, and addition funnel, was charged with dry magnesium turnings (0.528 g, 22 mmol), dry tetrahydrofuran (20 mL), and chlorotrimethylsilane (3.26 mL, 30 mmol). The appropriate benzyl chloride (20 mmol) in dry tetrahydrofuran (20 mL) was added slowly, at a rate to maintain gentle reflux. After addition was complete, the mixture was heated under reflux 2 h, cooled, and poured into cold water. Pentane (15 mL) was added and the pentane layer washed three times with cold water (30 mL) and once with saturated NaCl solution (30 mL), dried (MgSO<sub>4</sub>), and then rotary evaporated to yield the crude benzyl trimethylsilyl ether, which was purified by column chromatography to yield the silane derivatives as colorless oils.

### General procedure II (for **2g**)<sup>6</sup>

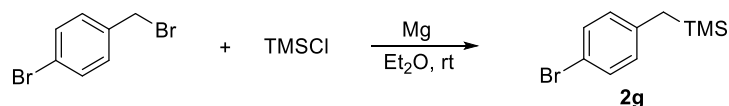

To a suspension of Mg-turnings (0.3 g) in Et<sub>2</sub>O (10 mL) was added a solution of (2.9 g, 12 mmol) of *p*-bromobenzyl bromide (Aldrich) in Et<sub>2</sub>O (20 mL). To the resulting Grignard reagent was added (3.0 mL, 24 mmol) of chlorotrimethylsilane (Aldrich), and the resulting mixture was stirred at 25 °C for 12 h. Addition of ice-water followed by separation, drying, and concentration of the mixture gave an oil which was subjected to molecular distillation (0.05 mm, 40 °C) to the silylbromoarene **2g** as an oil.

### General procedure III (for **2j**)<sup>7</sup>

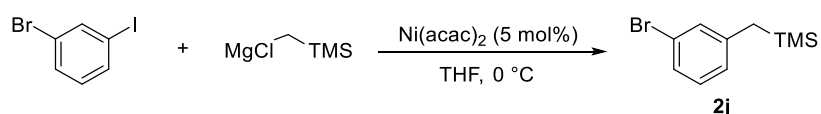

A solution of haloarene (1.0 equiv) and Ni(acac)<sub>2</sub> (0.05 equiv) in dry THF (0.24 M) was stirred for 5 min at room temperature and then cooled to 0 °C. A solution Me<sub>3</sub>SiCH<sub>2</sub>MgCl of in Et<sub>2</sub>O (1.5 equiv) was added *via* a cannula, and the mixture was allowed to stir at the indicated temperature for 2 h. At this point, the reaction was quenched with water and extracted with Et<sub>2</sub>O three times. The combined organic layers were washed with water, brine, dried over Na<sub>2</sub>SO<sub>4</sub> (anhydrous) and then concentrated under reduced pressure. Purification of the crude residue via silica gel flash column chromatography afforded benzyltrimethylsilane.

### General procedure IV (for **2k**)<sup>8</sup>

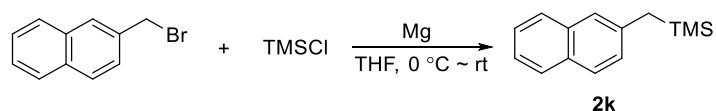

Dry magnesium turnings (0.85 g, 35 mmol) and TMSCl (5.7 mL, 44. mmol) was added as a single portion into THF (21 mL). The mixture was cooled to 0 °C and maintained for 15 min. 2-Naphthylbromide (7.00 g, 31.7 mmol) was dissolved in THF (56 mL) and added dropwise *via* syringe pump. The mixture was maintained for 5 h, and then it was allowed to warm to ambient temperature and maintained for 12 h. The mixture was then cooled to 0 °C, quenched and worked up as described in the general procedure I. Flash chromatography (2% Et<sub>2</sub>O/petroleum ether) afforded 6.10 g (90%) of **2k** as a white solid.

### General procedure V (for **2l**, **2m**, **2n**)<sup>8</sup>

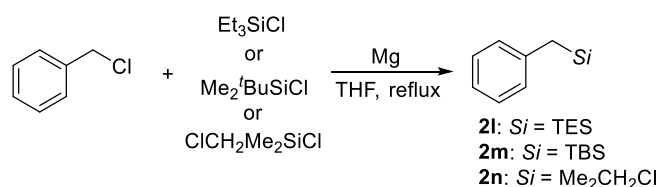

Activated Mg powder (1.1 equiv) was added as a single portion into a solution of aryl chloride in THF (0.8 M). The suspension was cooled to 0 °C and 1 h later, the mixture was allowed to warm to ambient temperature and was maintained for another 1 h. The reaction was then heated to reflux and the indicated chlorosilane (1.4 equiv) was added dropwise. After 12 h, the mixture was cooled to 0 °C and the reaction was quenched with saturated aqueous NH<sub>4</sub>Cl. The mixture was allowed to warm to ambient temperature, concentrated in vacuo, then taken up in Et<sub>2</sub>O and washed three times with brine. The combined aqueous phases were extracted twice with Et<sub>2</sub>O and the combined organic layers were dried over MgSO<sub>4</sub> and then concentrated in vacuo. The arylsilanes products were purified by flash chromatography.

### General procedure VI (for **2p**)<sup>9</sup>

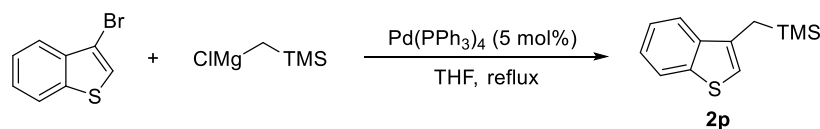

An oven-dried, argon purged two neck round-bottomed flask fitted with a condenser and septum was added magnesium turnings (750 mg, 2.2 equiv) and anhydrous THF (8 mL). Chloromethyl trimethylsilane (20 mmol, 2.8 mL, 3 equiv) was added dropwise to maintain reflux. The mixture was cooled to ambient temperature and transferred by cannula into a 50 mL sealable Schlenk tube containing a solution of 3-bromobenzothiophene (1.41 g, 6.65 mmol) and palladium tetrakis-(triphenylphosphine)-palladium (384 mg, 5 mol%) in anhydrous THF (10 mL). The mixture was heated to 80 °C for 48 hours. After the completion of this reaction, the mixture was cooled to room temperature and pour the solution into cold HCl solution (1 M, 50 mL), and then extracted the aqueous phase twice with pentane, the combined organic phase was dried over magnesium sulfate and concentrate in vacuo. The crude product was purified by flash chromatography (hexane 100%) to afford (benzo[b]thiophen-3-ylmethyl)trimethylsilane **2p**.

### 3. General procedure for the preparation of the racemic products

An oven-dried reaction tube was charged with *N*-sulfonyl cyclic ketimines **1** (0.1 mmol), benzyl silanes **2** (0.1 mmol), [Ir{dFCF<sub>3</sub>ppy}<sub>2</sub>(bpy)]PF<sub>6</sub> (1 mol%) and CHCl<sub>3</sub> (1.0 mL). The reaction mixture was positioned in four 20 W blue LEDs lamp under N<sub>2</sub> atmosphere at room temperature. After being stirred for the 0.5–24 h (monitored by TLC analysis), the reaction mixture was concentrated and then purified by flash chromatography on silica gel (eluted with PE/EtOAc/DCM = 8:1:1, v/v/v) to afford racemic product *rac*-**3**.

### 4. General procedure for the catalytic asymmetric reactions

An oven-dried reaction tube was charged with *N*-sulfonyl cyclic ketimines **1** (0.1 mmol), alkyl silanes **2** (0.1 mmol), [Ir{dFCF<sub>3</sub>ppy}<sub>2</sub>(bpy)]PF<sub>6</sub> (1 mol%), **L<sub>3</sub>-RaPr<sub>2</sub>Ad** (10 mol%), Ni(OTf)<sub>2</sub> (10 mol%), 4 Å MS (20 mg) and CHCl<sub>3</sub> (1.0 mL). The reaction mixture was positioned in four 20 W blue LEDs lamp under N<sub>2</sub> atmosphere at room temperature. After being stirred for the 0.5–72 h (monitored by TLC analysis), the reaction mixture was concentrated and then purified by flash chromatography on silica gel (eluted with PE/EtOAc/DCM = 8:1:1, v/v/v). *The reported isolated yields represented the total yield of the two diastereomers.*

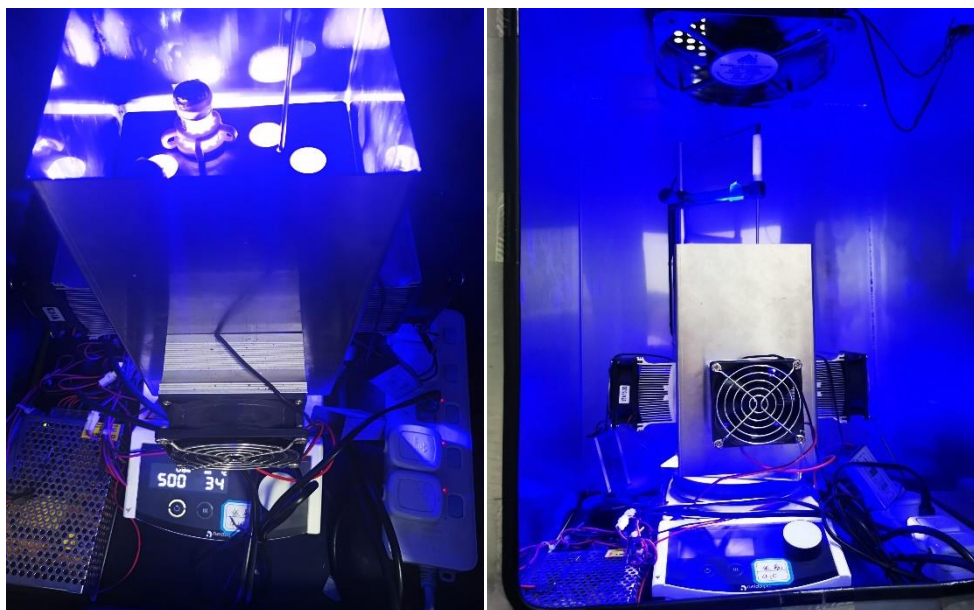

**Figure S1.** Photochemical setup with blue LEDs

## 5. Optimization of the reaction conditions

**Table S1.** Screening of the photocatalysts

Photocatalyst (x mol%)  
**L<sub>3</sub>-RaPr<sub>2</sub>**/Ni(OTf)<sub>2</sub>  
 (1:1, 10 mol%)  
 20 W blue LEDs,  
 N<sub>2</sub>, rt, CHCl<sub>3</sub>, 6 h

1a + 2a → 3a or 3a'

**L<sub>3</sub>-RaPr<sub>2</sub>**: R = 2,6-*i*Pr<sub>2</sub>C<sub>6</sub>H<sub>3</sub>

| Entry <sup>a</sup> | photocatalyst (x mol%)                                                                          | yield/% <sup>b</sup> | ee/% <sup>c</sup>      | dr <sup>c</sup> |
|--------------------|-------------------------------------------------------------------------------------------------|----------------------|------------------------|-----------------|
| 1                  | xanthone (4 mol%)                                                                               | 0                    | /                      | /               |
| 2                  | <i>fac</i> -Ir(dFppy) <sub>3</sub> (1 mol%)                                                     | 0                    | /                      | /               |
| 3                  | 4CzIPN (1 mol%)                                                                                 | 0                    | /                      | /               |
| 4                  | [Ir[d(Me)ppy] <sub>2</sub> (dtbbpy)]PF <sub>6</sub> (1 mol%)                                    | 12                   | 2/-3                   | 54:46           |
| 5                  | [Ir[dF(CF <sub>3</sub> )ppy] <sub>2</sub> (bpy)]PF <sub>6</sub> (1 mol%)                        | 69                   | 63/15                  | 66:34           |
| 6                  | [Ir[dF(Me)ppy] <sub>2</sub> (dtbbpy)]PF <sub>6</sub> (1 mol%)                                   | 32                   | 32/-6                  | 55:45           |
| 7 <sup>d</sup>     | [Ir[dF(CF <sub>3</sub> )ppy] <sub>2</sub> (5,5'-dCF <sub>3</sub> -bpy)]PF <sub>6</sub> (1 mol%) | 30(38)               | 62/11(29) <sup>d</sup> | 64:36           |
| 8                  | Ru(bpz) <sub>3</sub> PF <sub>6</sub> (1 mol%)                                                   | 0                    | /                      | /               |
| 9                  | Mes-Acr-Me-ClO <sub>4</sub> (2 mol%)                                                            | 0(95)                | / (17)                 | /               |
| 10                 | Anthraquinone (2 mol%)                                                                          | 33                   | 18/-8                  | 55:45           |
| 11                 | Eosin Y (1 mol%)                                                                                | 0                    | /                      | /               |
| 12                 | Na <sub>4</sub> W <sub>10</sub> O <sub>24</sub> (1 mol%)                                        | 0                    | /                      | /               |
| 13                 | Rhodamine B (1 mol%)                                                                            | 0                    | /                      | /               |

<sup>a</sup>All the reactions were performed with Ni(OTf)<sub>2</sub> (10 mol%), **L<sub>3</sub>-RaPr<sub>2</sub>** (10 mol%), **1a** (0.10 mmol), **2a** (0.10 mmol) and photocatalyst (x mol%) in CHCl<sub>3</sub> (1.0 mL) at rt under the irradiation of 20 W blue LEDs for 6 h. <sup>b</sup>Yield of isolated product. <sup>c</sup>The ee and dr values were determined by UPC<sup>2</sup> analysis. <sup>d</sup>Data of desilylation product **3a'** in parenthesis.

**Table S2.** Screening of the ligands

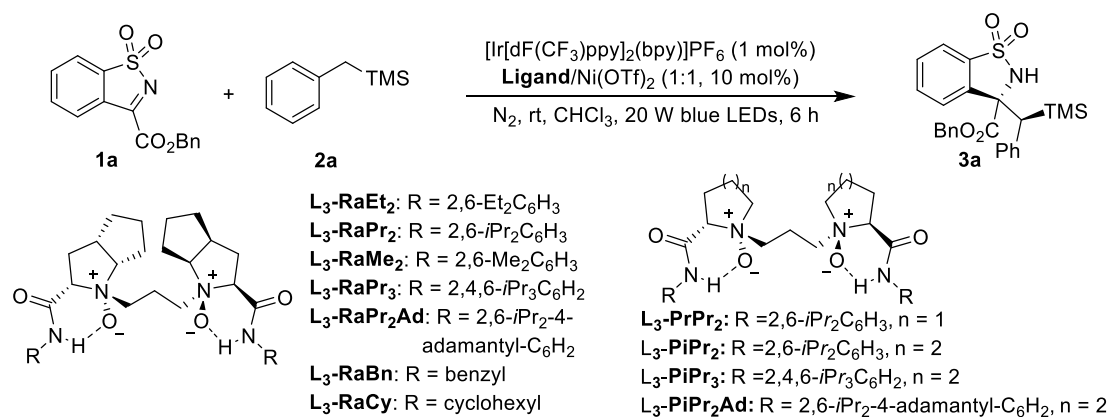

| entry <sup>a</sup> | ligand                                | yield/% <sup>b</sup> | ee/% <sup>c</sup> | dr <sup>c</sup> |
|--------------------|---------------------------------------|----------------------|-------------------|-----------------|
| 1                  | <b>L<sub>3</sub>-RaPr<sub>2</sub></b> | 69                   | 62/13             | 66:34           |
| 2                  | <b>L<sub>3</sub>-PiPr<sub>2</sub></b> | 73                   | 91/44             | 73:27           |
| 3                  | <b>L<sub>3</sub>-PrPr<sub>2</sub></b> | 51                   | 57/31             | 60:40           |
| 4                  | <b>L<sub>3</sub>-RaEt<sub>2</sub></b> | 50                   | 38/19             | 60:40           |
| 5                  | <b>L<sub>3</sub>-RaMe<sub>2</sub></b> | 32                   | 7/-8              | 52:48           |
| 6                  | <b>L<sub>3</sub>-RaPr<sub>3</sub></b> | 86                   | 91/44             | 81:19           |

|    |                                         |    |         |       |
|----|-----------------------------------------|----|---------|-------|
| 7  | <b>L<sub>3</sub>-PiPr<sub>3</sub></b>   | 56 | 92/55   | 78:22 |
| 8  | <b>L<sub>3</sub>-RaPr<sub>2</sub>Ad</b> | 75 | 94/47   | 86:14 |
| 9  | <b>L<sub>3</sub>-PiPr<sub>2</sub>Ad</b> | 79 | 93/57   | 77:23 |
| 10 | <b>L<sub>3</sub>-RaBn</b>               | 52 | 26/-17  | 55:45 |
| 11 | <b>L<sub>3</sub>-RaCy</b>               | 64 | -32/-39 | 47:53 |

<sup>a</sup>All the reactions were performed with Ni(OTf)<sub>2</sub> (10 mol %), **ligand** (10 mol %), **1a** (0.10 mmol), **2a** (0.10 mmol) and [Ir[dF(CF<sub>3</sub>)ppy]<sub>2</sub>(bpy)]PF<sub>6</sub> (1 mol %) in CHCl<sub>3</sub> (1.0 mL) at rt under the irradiation of 20 W blue LEDs for 6 h. <sup>b</sup>Yield of isolated product. <sup>c</sup>The ee and dr values were determined by UPC<sup>2</sup> analysis.

**Table S3.** Screening of the metal salts

| entry <sup>a</sup> | metal salts                                           | yield/% <sup>b</sup> | ee/% <sup>c</sup> | dr <sup>c</sup> |
|--------------------|-------------------------------------------------------|----------------------|-------------------|-----------------|
| 1                  | Ni(OTf) <sub>2</sub>                                  | 76                   | 94/48             | 86:14           |
| 2                  | Mg(OTf) <sub>2</sub>                                  | 46                   | -3/-10            | 50:50           |
| 3                  | Sc(OTf) <sub>3</sub>                                  | 36                   | 11/0              | 50:50           |
| 4                  | Y(OTf) <sub>3</sub>                                   | 41                   | -13/-13           | 49:51           |
| 5                  | Fe(OTf) <sub>2</sub>                                  | 37                   | 7/-3              | 54:46           |
| 6                  | Zn(OTf) <sub>2</sub>                                  | 71                   | 61/63             | 63:37           |
| 7                  | Co(OTf) <sub>2</sub>                                  | 58                   | 70/6              | 69:31           |
| 8                  | Cu(OTf) <sub>2</sub>                                  | 49                   | 2/-8              | 48:52           |
| 9                  | Ni(NTf <sub>2</sub> ) <sub>2</sub>                    | 73                   | 90/37             | 82:18           |
| 10                 | Ni(acac) <sub>2</sub>                                 | 71                   | 37/5              | 68:32           |
| 11                 | Ni(ClO <sub>4</sub> ) <sub>2</sub> ·6H <sub>2</sub> O | 39                   | -6/-10            | 51:49           |
| 12                 | Ni(BF <sub>4</sub> ) <sub>2</sub> ·6H <sub>2</sub> O  | 56                   | -37/-10           | 58:42           |
| 13                 | NiCl <sub>2</sub>                                     | 57                   | -8/-2             | 49:51           |

<sup>a</sup>All the reactions were performed with metal salt (10 mol%), **L<sub>3</sub>-RaPr<sub>2</sub>Ad** (10 mol%), **1a** (0.10 mmol), **2a** (0.10 mmol) and [Ir[dF(CF<sub>3</sub>)ppy]<sub>2</sub>(bpy)]PF<sub>6</sub> (1 mol%) in CHCl<sub>3</sub> (1.0 mL) at rt under the irradiation of 20 W blue LEDs for 6 h. <sup>b</sup>Yield of isolated product.

<sup>c</sup>The ee and dr values were determined by UPC<sup>2</sup> analysis.

**Table S4.** Screening of the ratio between **1a** and **2a**

| entry <sup>a</sup> | x:y       | yield/% <sup>b</sup> | ee/% <sup>c</sup> | dr <sup>c</sup> |
|--------------------|-----------|----------------------|-------------------|-----------------|
| 1                  | 0.12:0.10 | 94                   | 94/48             | 86:14           |
| 2                  | 0.10:0.10 | 76                   | 94/50             | 86:14           |
| 3                  | 0.10:0.12 | 80                   | 95/52             | 86:14           |



<sup>a</sup>All the reactions were performed with Ni(OTf)<sub>2</sub> (10 mol%), **L<sub>3</sub>-RaPr<sub>2</sub>Ad** (10 mol%), **1a** (x mmol), **2a** (y mmol) and [Ir[dF(CF<sub>3</sub>)ppy]<sub>2</sub>(bpy)]PF<sub>6</sub> (1 mol%) in CHCl<sub>3</sub> (1.0 mL) at rt under the irradiation of 20 W blue LEDs for 6 h. <sup>b</sup>Yield of isolated product. <sup>c</sup>The ee and d.r. values were determined by UPC<sup>2</sup> analysis.

**Table S5.** Screening of the solvents and concentration.

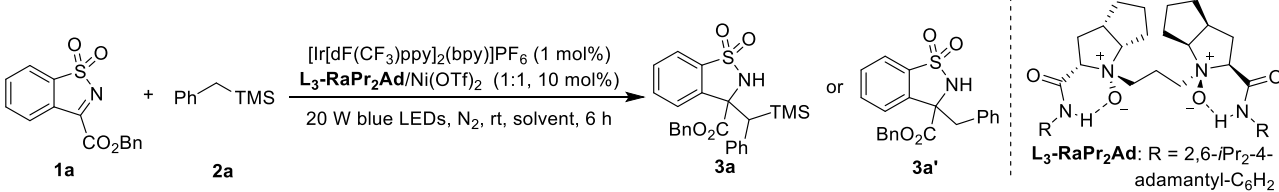

| entry <sup>a</sup> | solvents           | yield/% <sup>b</sup> | ee/% <sup>c</sup> | dr <sup>c</sup> |
|--------------------|--------------------|----------------------|-------------------|-----------------|
| 1                  | CHCl <sub>3</sub>  | 94                   | 94/48             | 86:14           |
| 2                  | THF                | 0(11)                | n.a.              | n.a.            |
| 3 <sup>d</sup>     | Toluene            | 23(75)               | 92/35(47)         | 85:15           |
| 4                  | CH <sub>3</sub> CN | 0(99)                | n.a.(36)          | n.a.            |
| 5                  | CH <sub>3</sub> OH | 0(98)                | n.a.(7)           | n.a.            |
| 6                  | Et <sub>2</sub> O  | 0                    | n.a.              | n.a.            |
| 7 <sup>e</sup>     | CHCl <sub>3</sub>  | 66                   | 91/37             | 83.5:16.5       |
| 8 <sup>f</sup>     | CHCl <sub>3</sub>  | 85                   | 92/42             | 84:16           |

<sup>a</sup>All the reactions were performed with Ni(OTf)<sub>2</sub> (10 mol%), **L<sub>3</sub>-RaPr<sub>2</sub>Ad** (10 mol%), **1a** (0.12 mmol), **2a** (0.10 mmol) and [Ir[dF(CF<sub>3</sub>)ppy]<sub>2</sub>(bpy)]PF<sub>6</sub> (1 mol%) in corresponding solvents (1.0 mL) at rt under the irradiation of 20 W blue LEDs for 6 h. <sup>b</sup>Yield of isolated product. <sup>c</sup>The ee and dr values were determined by UPC<sup>2</sup> analysis. <sup>d</sup>Data of desilylation product **3a'** in parenthesis. <sup>e</sup>CHCl<sub>3</sub> (0.5 mL). <sup>f</sup>CHCl<sub>3</sub> (2.0 mL).

**Table S6.** Screening of the amount of chiral catalyst, reaction temperature and time

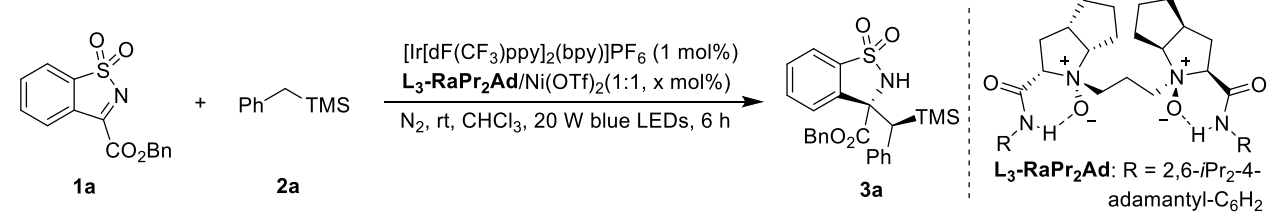

| entry <sup>a</sup> | x  | yield/% <sup>b</sup> | ee/% <sup>c</sup> | dr <sup>c</sup> |
|--------------------|----|----------------------|-------------------|-----------------|
| 1                  | 10 | 94                   | 94/48             | 86:14           |
| 2                  | 5  | 87                   | 92/42             | 84:16           |
| 3                  | 1  | 43                   | 41/0              | 61:39           |
| 4 <sup>d</sup>     | 10 | 87                   | 93/56             | 85:15           |
| 5 <sup>e</sup>     | 10 | 74                   | 90/49             | 84:16           |
| 6 <sup>f</sup>     | 10 | 92                   | 93/46             | 86:14           |

<sup>a</sup>All the reactions were performed with Ni(OTf)<sub>2</sub> (x mol%), **L<sub>3</sub>-RaPr<sub>2</sub>Ad** (x mol%), **1a** (0.12 mmol), **2a** (0.10 mmol) and [Ir[dF(CF<sub>3</sub>)ppy]<sub>2</sub>(bpy)]PF<sub>6</sub> (1 mol%) in CHCl<sub>3</sub> (1.0 mL) at rt under the irradiation of 20 W blue LEDs for 6 h. <sup>b</sup>Yield of isolated product. <sup>c</sup>The ee and dr values were determined by UPC<sup>2</sup> analysis. <sup>d</sup>At 10 °C. <sup>e</sup>At -10 °C. <sup>f</sup>For 0.5 h.

**Table S7.** Screening of the additives

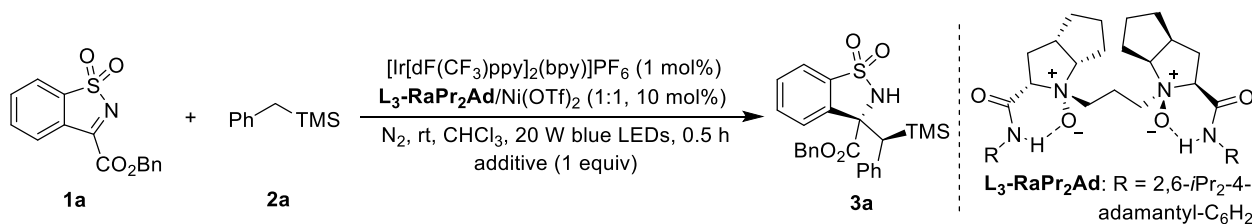

| entry <sup>a</sup> | additives                       | yield/% <sup>b</sup> | ee/% <sup>c</sup> | dr <sup>c</sup> |
|--------------------|---------------------------------|----------------------|-------------------|-----------------|
| 1                  | -                               | 94                   | 94/48             | 86:14           |
| 2                  | NaBr                            | 83                   | 91/35             | 83:17           |
| 3                  | LiBr                            | 27                   | 83/33             | 78:22           |
| 4                  | MgSO <sub>4</sub>               | 70                   | 87/27             | 80:20           |
| 5                  | Na <sub>2</sub> SO <sub>4</sub> | 78                   | 89/34             | 82:18           |
| 6                  | LiCl                            | 79                   | 93/45             | 85:15           |
| 7 <sup>d</sup>     | 3 Å MS                          | 93                   | 95/43             | 86:14           |
| 8 <sup>d</sup>     | 4 Å MS                          | 95                   | 95/40             | 86:14           |
| 9 <sup>d</sup>     | 5 Å MS                          | 94                   | 93/45             | 86:14           |
| 10                 | H <sub>2</sub> O                | 67                   | 84/0              | 76:24           |

<sup>a</sup>All the reactions were performed with  $\text{Ni}(\text{OTf})_2$  (10 mol%),  $\text{L}_3\text{-RaPr}_2\text{Ad}$  (10 mol%), **1a** (0.12 mmol), **2a** (0.10 mmol) and  $[\text{Ir}[\text{dF}(\text{CF}_3)\text{ppy}]_2(\text{bpy})]\text{PF}_6$  (1 mol%) in  $\text{CHCl}_3$  (1.0 mL) at rt under the irradiation of 20 W blue LEDs for 0.5 h. <sup>b</sup>Yield of isolated product. <sup>c</sup>The ee and dr values were determined by UPC<sup>2</sup> analysis. <sup>d</sup>20 mg.

## 6. The limited substrate scope

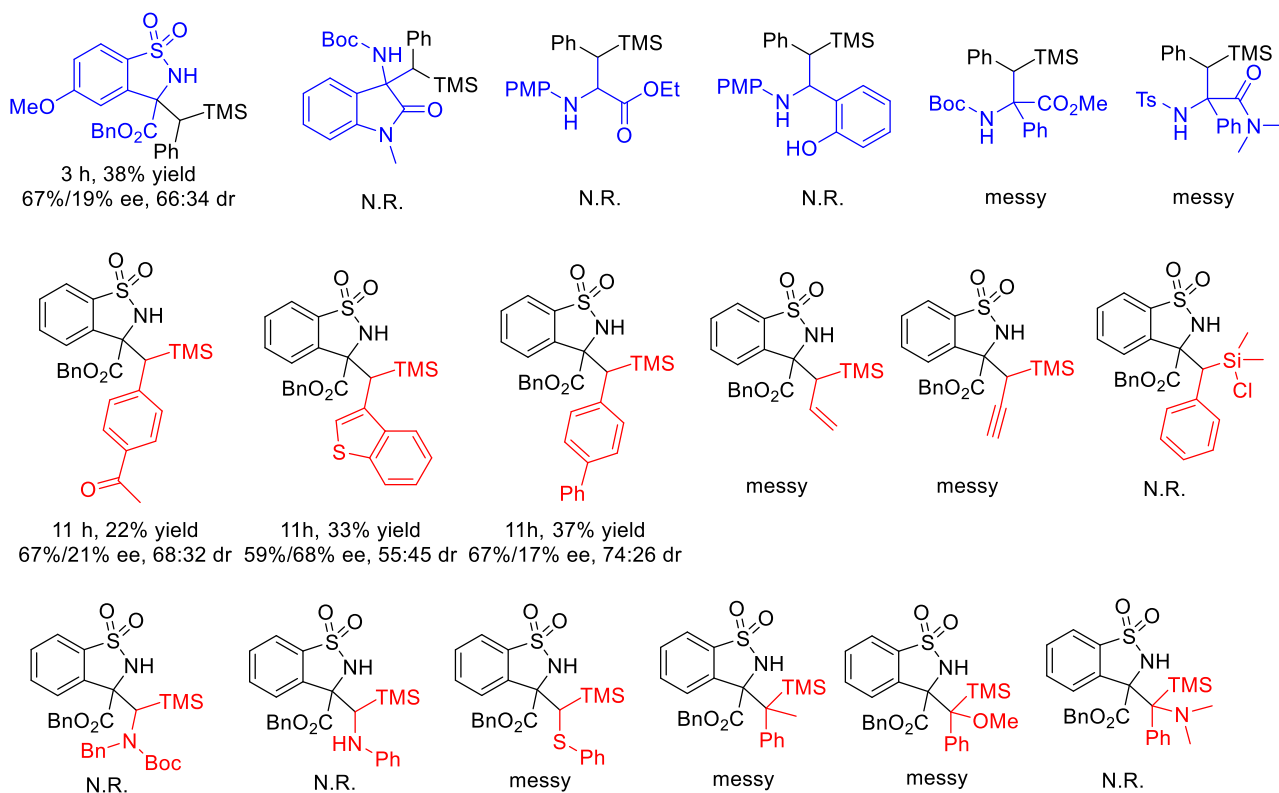

## 7. Control experiments

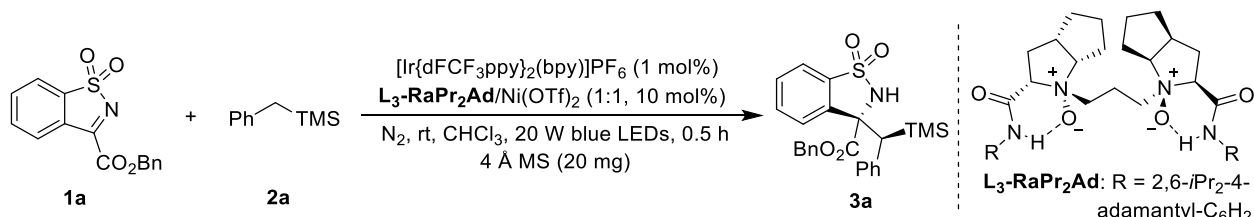

| Entry <sup>a</sup> | variation of conditions                                             | yield/% <sup>b</sup> | ee/% <sup>c</sup> | d.r. <sup>c</sup> |
|--------------------|---------------------------------------------------------------------|----------------------|-------------------|-------------------|
| 1                  | none                                                                | 95                   | 95                | 86:14             |
| 2                  | without light                                                       | 0                    | /                 | /                 |
| 3                  | without Ir                                                          | 0                    | /                 | /                 |
| 4                  | without $\text{L}_3\text{-RaPr}_2\text{Ad}/\text{Ni}(\text{OTf})_2$ | 48                   | /                 | 52:48             |
| 5                  | without $\text{L}_3\text{-RaPr}_2\text{Ad}$                         | 28                   | /                 | 47:53             |
| 6                  | without $\text{Ni}(\text{OTf})_2$                                   | 48                   | /                 | 51:49             |
| 7                  | in air                                                              | 0                    | /                 | /                 |

<sup>a</sup>All the reactions were performed with  $\text{Ni}(\text{OTf})_2$  (10 mol%),  $\text{L}_3\text{-RaPr}_2\text{Ad}$  (10 mol%), **1a** (0.12 mmol), **2a** (0.10 mmol) and  $[\text{Ir}\{\text{dFCF}_3\text{ppy}\}_2(\text{bpy})]\text{PF}_6$  (1 mol%) in  $\text{CHCl}_3$  (1.0 mL) at rt under the irradiation of 20 W blue LEDs for 0.5 h. <sup>b</sup>Yield of isolated product. <sup>c</sup>The ee and dr values were determined by UPC<sup>2</sup> analysis.

## 8. Mechanistic investigations

### 8.1 Catalytic reaction interfered with a radical quencher

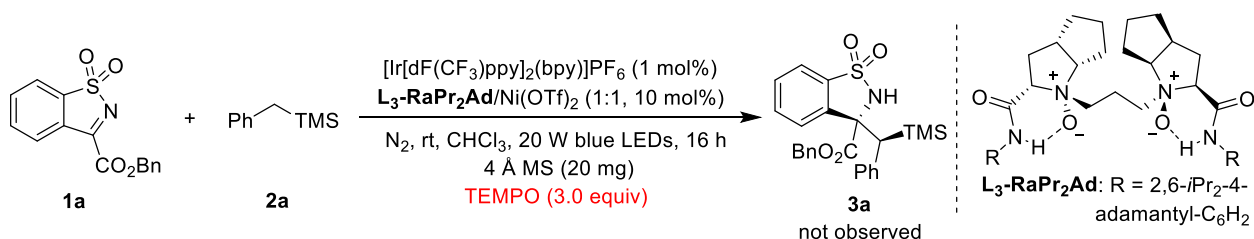

The reaction was performed with  $\text{Ni}(\text{OTf})_2$  (10 mol%),  $\text{L}_3\text{-RaPr}_2\text{Ad}$  (10 mol%), **1a** (0.12 mmol), **2a** (0.10 mmol),  $[\text{Ir}\{\text{dFCF}_3\text{ppy}\}_2(\text{bpy})]\text{PF}_6$  (1 mol%), 4 Å MS (20 mg) and TEMPO (3 equiv) in  $\text{CHCl}_3$  (1.0 mL) at rt under the irradiation of 20 W blue LEDs for 16 h. No desired product **3a** was observed.

### 8.2 Detection of the homocoupling product 4a

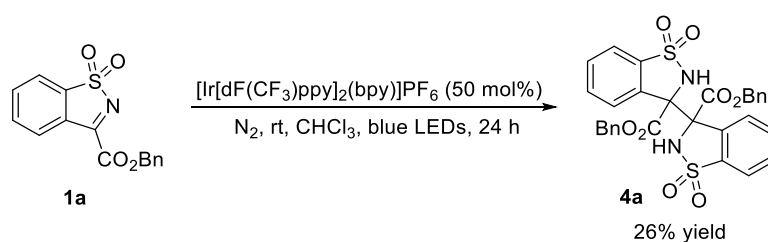

The reaction was performed with **1a** (0.10 mmol) and  $[\text{Ir}\{\text{dFCF}_3\text{ppy}\}_2(\text{bpy})]\text{PF}_6$  (50 mol%) in  $\text{CHCl}_3$  (1.0 mL) at rt under the irradiation of 20 W blue LEDs for 24 h. Then the reaction mixture was concentrated and purified by flash chromatography on silica gel (eluted with PE:EtOAc = 4:1 to 2:1) to afford product **4a** as a white solid (15.8 mg, 26% yield).

### 8.3 EPR studies

The reactions were performed with  $\text{Ni}(\text{OTf})_2$  (10 mol%), **L3-RaPr<sub>2</sub>Ad** (10 mol%), **1a** (0.12 mmol), **2a** (0.10 mmol),  $[\text{Ir}\{\text{dF}(\text{CF}_3)\text{ppy}\}_2(\text{bpy})]\text{PF}_6$  (1 mol%), 4 Å MS (20 mg) in  $\text{CHCl}_3$  (1.0 mL) under the irradiation of 20 W blue LEDs. After being stirred at rt for 15 min, DMPO (5,5-dimethyl-1-pyrroline *N*-oxide, 11.3 mg, 0.10 mmol) was added. The reaction mixture was analyzed by electron paramagnetic resonance (EPR). The existence of radical **6** was further established by HRMS.

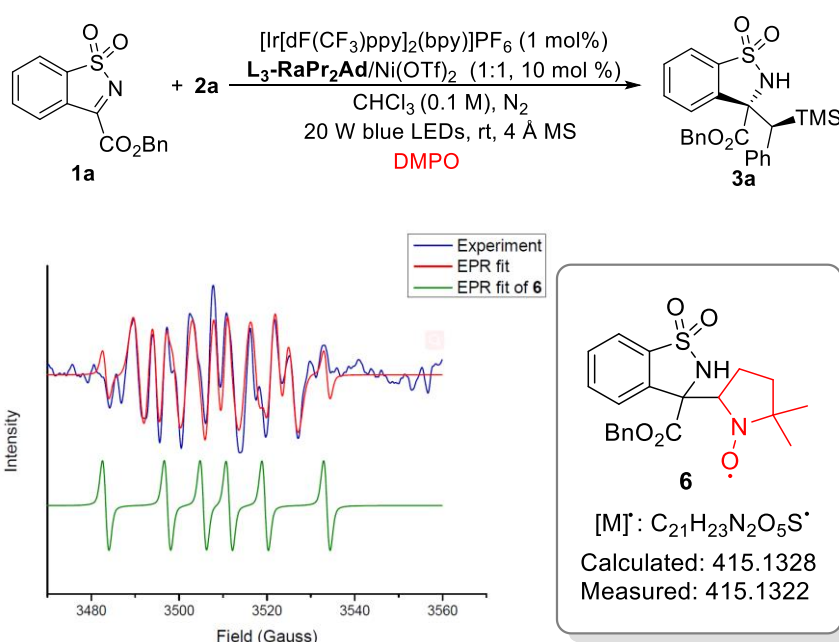

Figure S2. EPR spectra of the reaction mixture and **6**

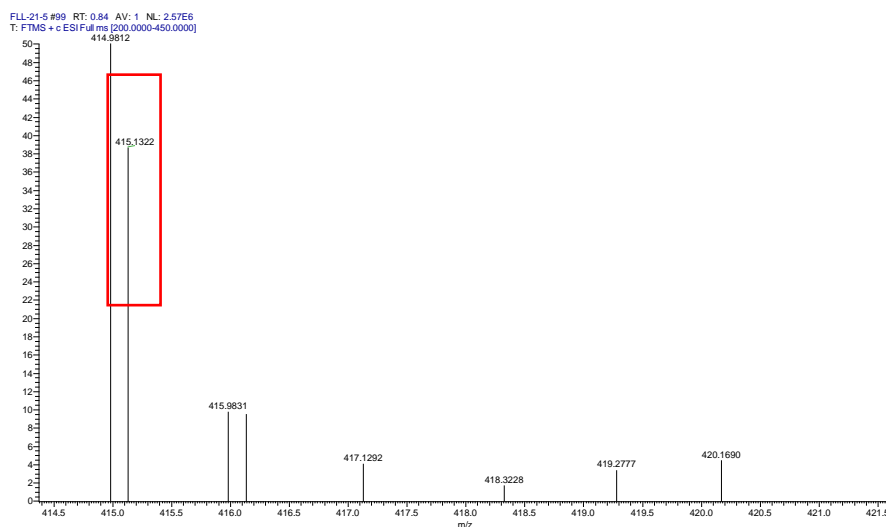

Figure S3. HRMS spectra of **6**

#### 8.4 Stern-Volmer emission quenching experiments

All  $[\text{Ir}\{\text{dFCF}_3\text{ppy}\}_2(\text{bpy})]\text{PF}_6$  solutions were excited at 370 nm and the emission intensity was collected at 420-600 nm. Stern-Volmer quenching experiments were carried out using a 0.1 mM solution of  $[\text{Ir}\{\text{dFCF}_3\text{ppy}\}_2(\text{bpy})]\text{PF}_6$  and variable concentrations (1, 2, 4, 6, 8 mM) of imine **1a** or benzyltrimethylsilane **2a**. The samples were prepared in 2 mL quartz cuvettes. The intensity of the emission peak at 468 nm ( $\lambda_{\text{ex}} = 370$  nm) for  $[\text{Ir}\{\text{dFCF}_3\text{ppy}\}_2(\text{bpy})]\text{PF}_6$  expressed as the ratio  $I_0/I$ , where  $I_0$  is the emission intensity of  $[\text{Ir}\{\text{dFCF}_3\text{ppy}\}_2(\text{bpy})]\text{PF}_6$  at 468 nm in the absence of a quencher and  $I$  is the observed intensity, as a function of the quencher concentration was measured.

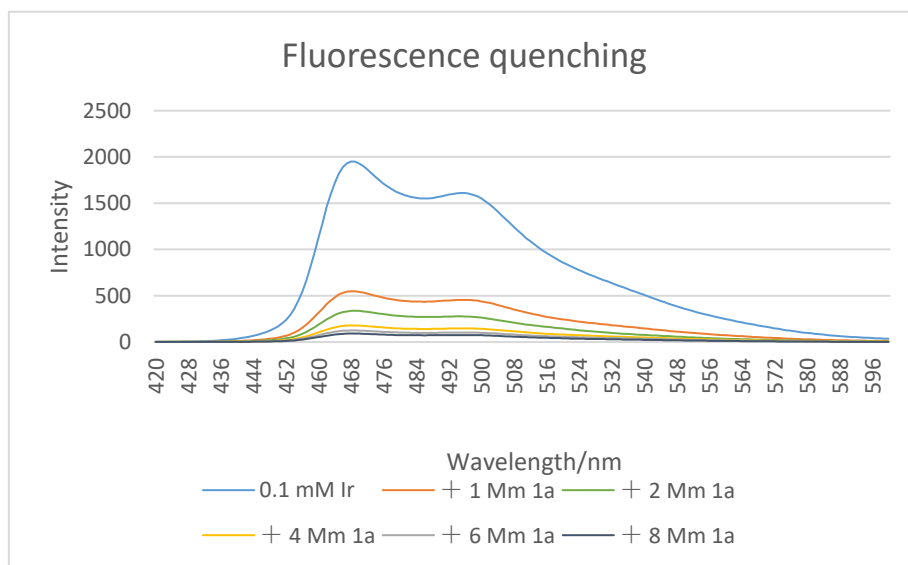

Figure S4. Fluorescence quenching spectra of **1a**

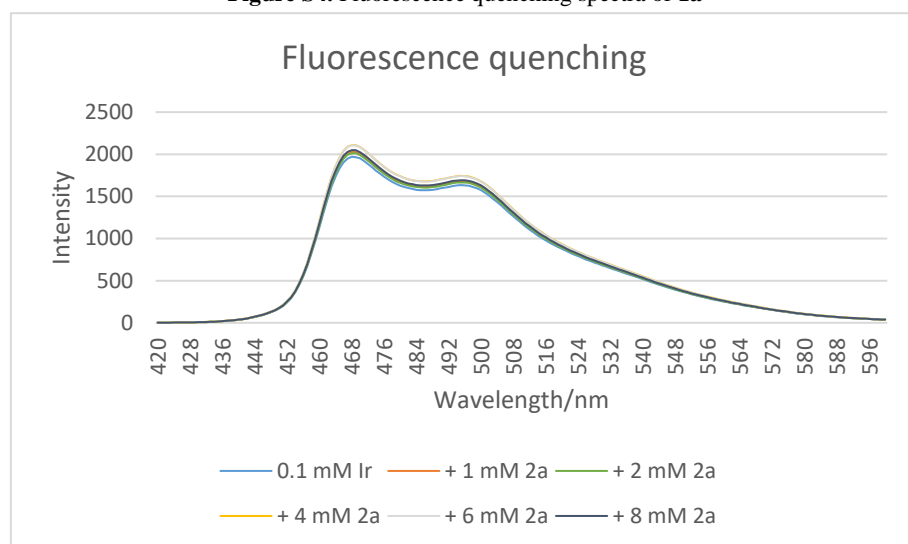

Figure S5. Fluorescence quenching spectra of **2a**

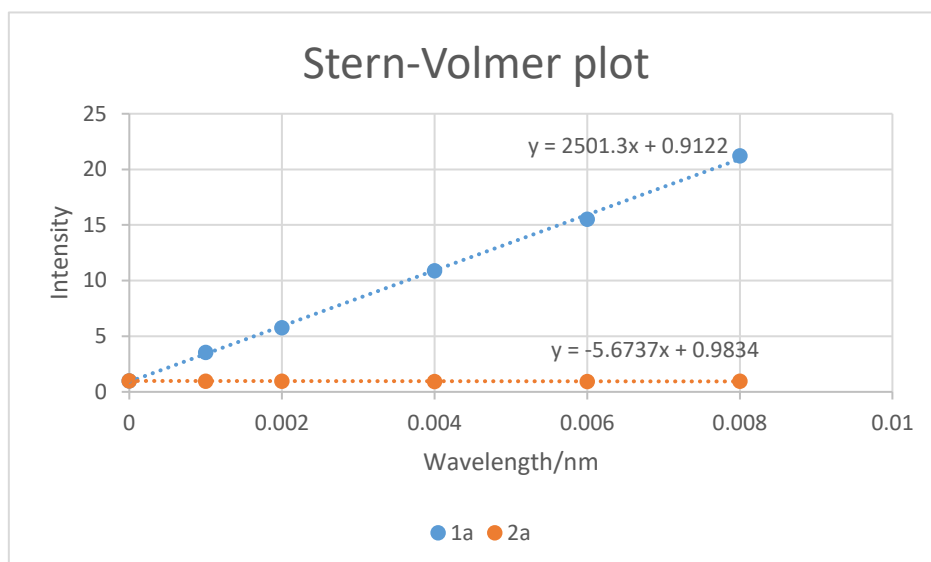

**Figure S6.** Stern-Volmer quenching study of **1a** and **2a**

All  $[\text{Ir}\{\text{dFCF}_3\text{ppy}\}_2(\text{bpy})]\text{PF}_6$  solutions were excited at 370 nm and the emission intensity was collected at 420-600 nm. Stern-Volmer quenching experiments were carried out using a 0.1 mM solution of  $[\text{Ir}\{\text{dFCF}_3\text{ppy}\}_2(\text{bpy})]\text{PF}_6$  and variable concentrations (0.5, 1.0, 1.5, 2.0 mM) of imine **1a** or **1a**/ $\text{Ni}(\text{OTf})_2/\text{L}_3\text{-RaPr}_2\text{Ad}$ . The samples were prepared in 2 mL quartz cuvettes. The intensity of the emission peak at 470 nm ( $\lambda_{\text{ex}} = 370$  nm) for  $[\text{Ir}\{\text{dFCF}_3\text{ppy}\}_2(\text{bpy})]\text{PF}_6$  expressed as the ratio  $I_0/I$ , where  $I_0$  is the emission intensity of  $[\text{Ir}\{\text{dFCF}_3\text{ppy}\}_2(\text{bpy})]\text{PF}_6$  at 470 nm in the absence of a quencher and  $I$  is the observed intensity, as a function of the quencher concentration was measured.

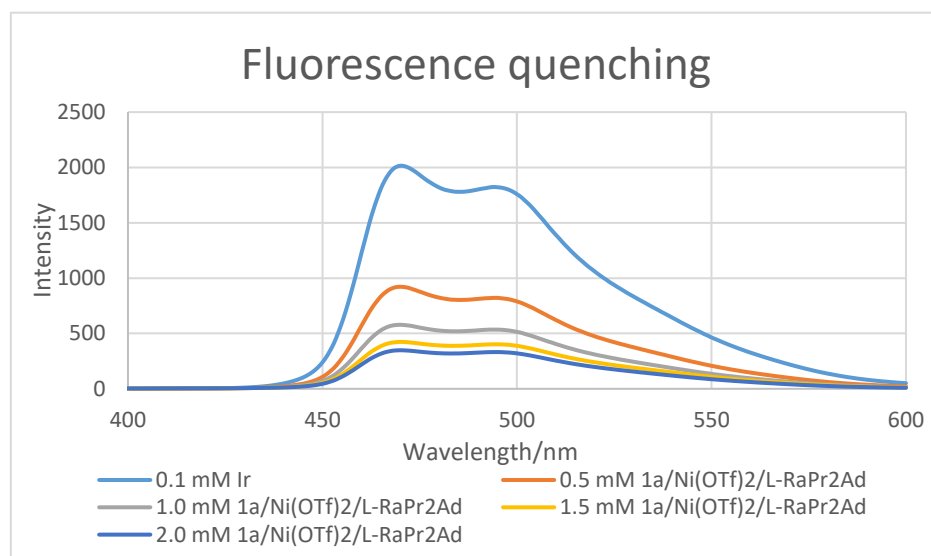

**Figure S7.** Fluorescence quenching spectra of **1a**/ $\text{Ni}(\text{OTf})_2/\text{L-RaPr}_2\text{Ad}$

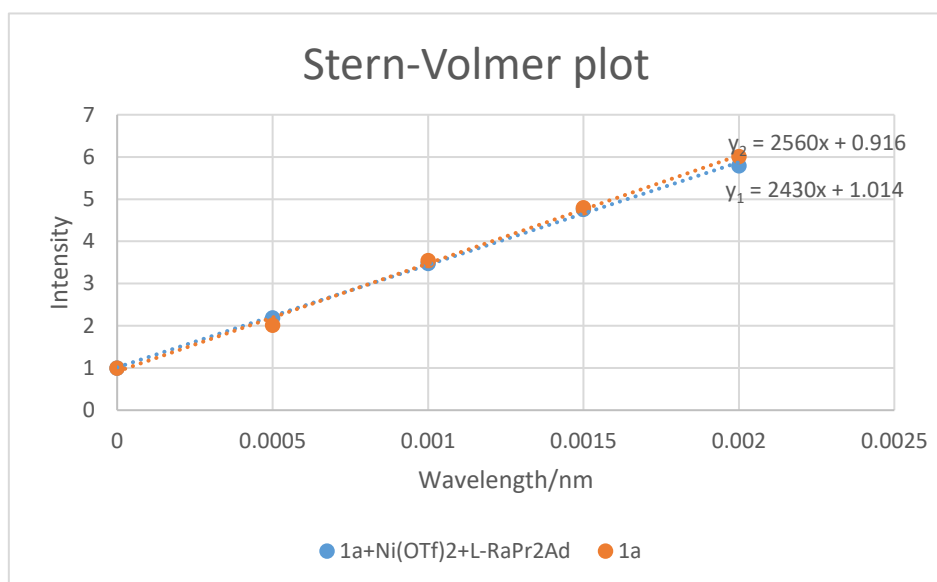

**Figure S8.** Stern-Volmer quenching study of **1a** and **1a/Ni(OTf)<sub>2</sub>/L<sub>3</sub>-RaPr<sub>2</sub>Ad**

### 8.5 Deuterium experiment

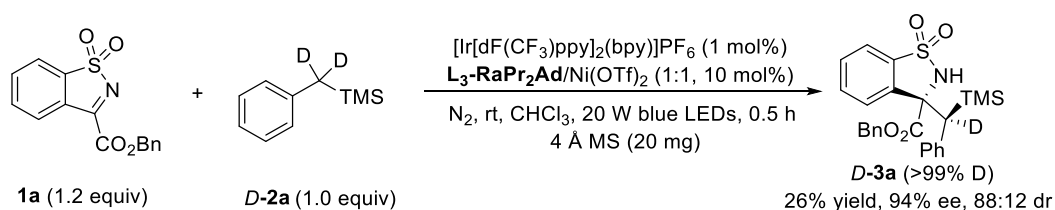

The reaction was performed according to the typical procedure by using deuterated benzyl trimethyl silicon **D-2a**. The deuterated ratio was determined by <sup>1</sup>H NMR spectrum after chromatography with silica gel column. The peak of H at 3.31 ppm is not observed, which indicates full deuteration of H.

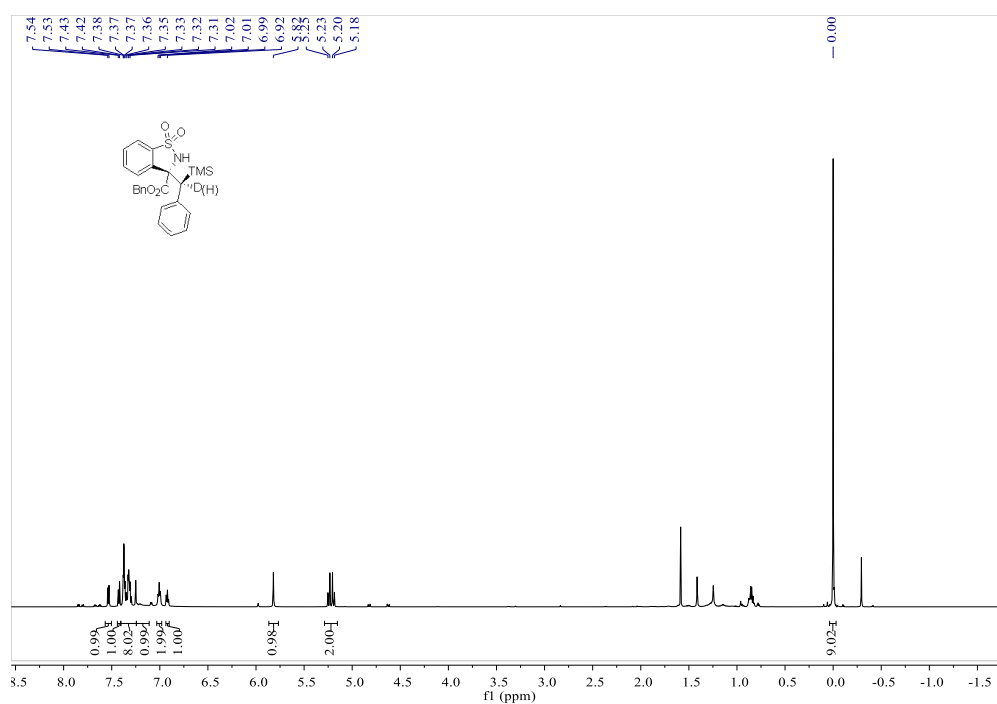

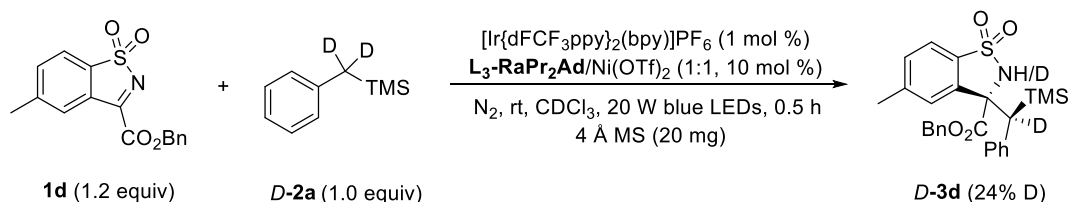

The reaction was performed according to the typical procedure by using deuterated benzyl trimethyl silicon **D-2a**. The deuterated ratio was determined by  $^1\text{H}$  NMR spectrum after filtration under nitrogen atmosphere. The peak integral at 5.78 is 0.76 and the deuteration rate is 0.24, suggesting the N-H comes from **D-2a**.

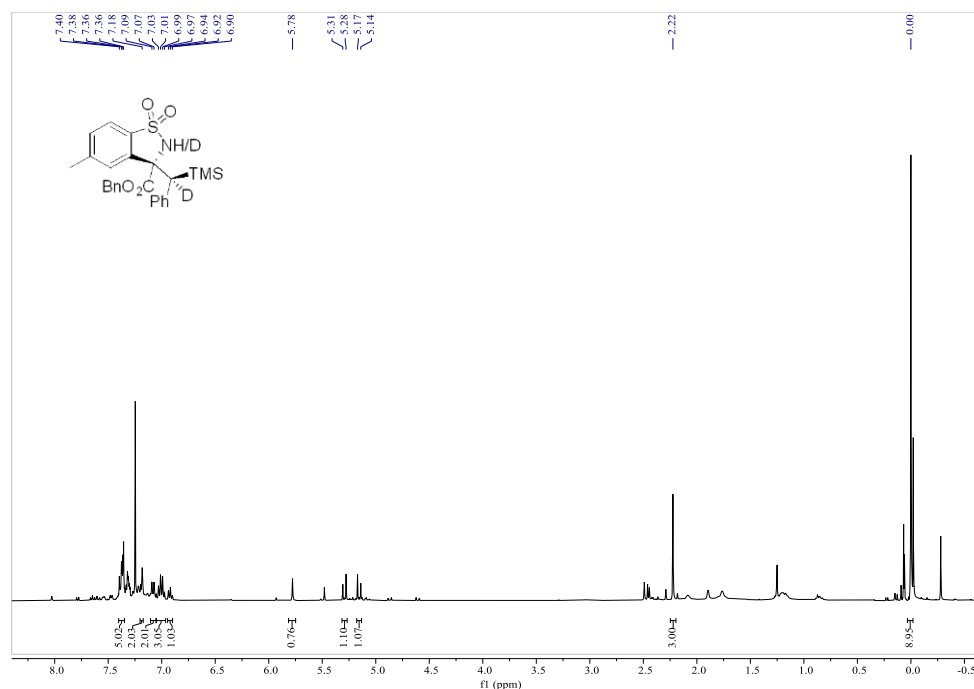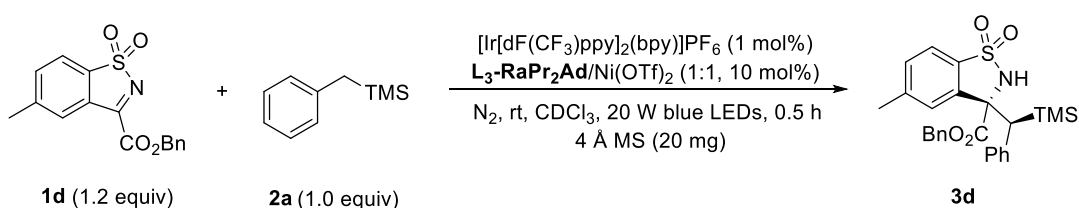

The deuterated ratio was determined by  $^1\text{H}$  NMR spectrum after filtration under nitrogen atmosphere. The peak integral at 5.80 is 1.00.



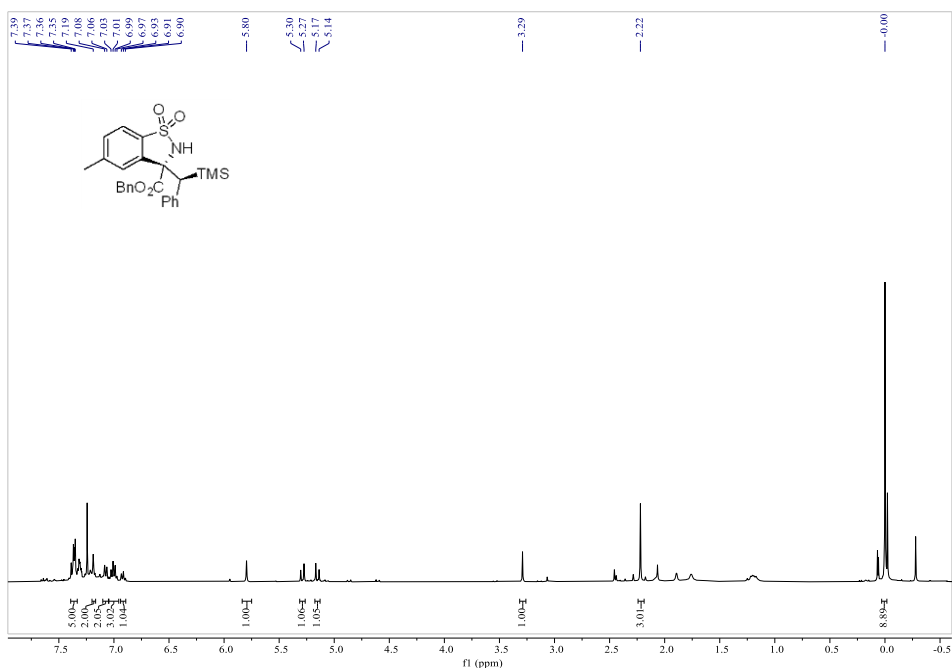

## 8.6 KIE experiment

### Competitive KIE experiments

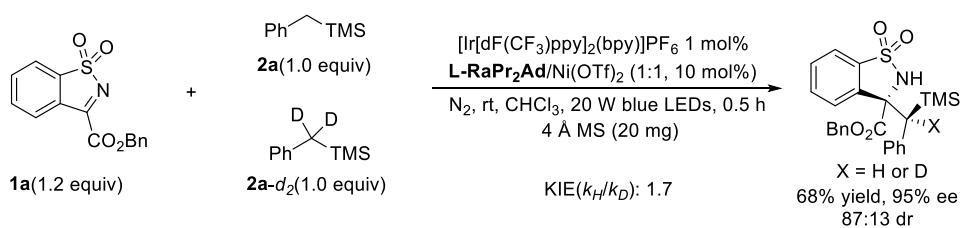

The reaction was performed according to the typical procedure by using a mixture of **2a** (0.10 mmol) and deuterated borane adduct *D-2a* (0.10 mmol). The deuterated ratio was determined by  $^1\text{H}$  NMR spectrum after chromatography with silica gel column.

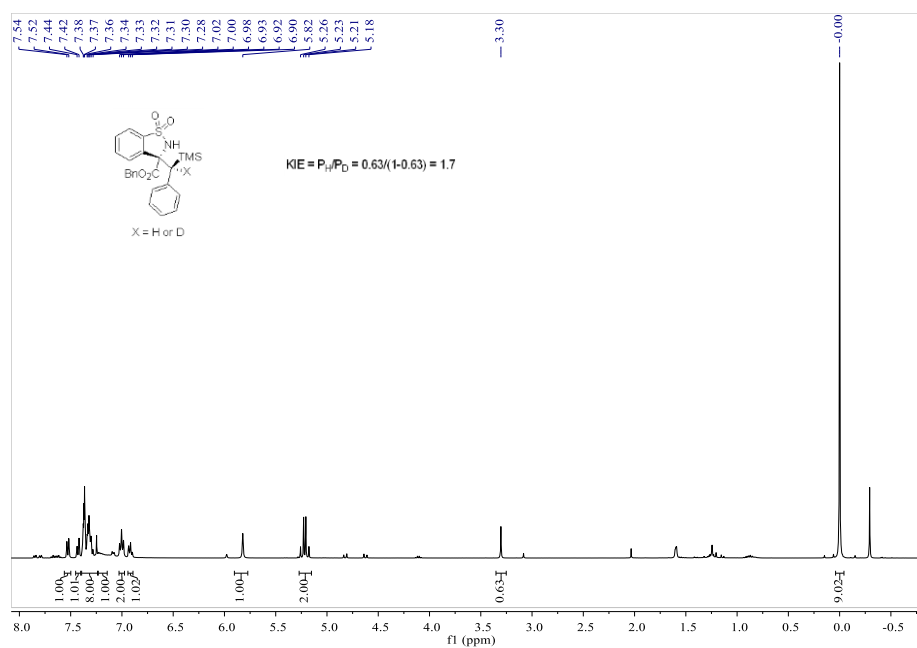

## Parallel KIE experiments

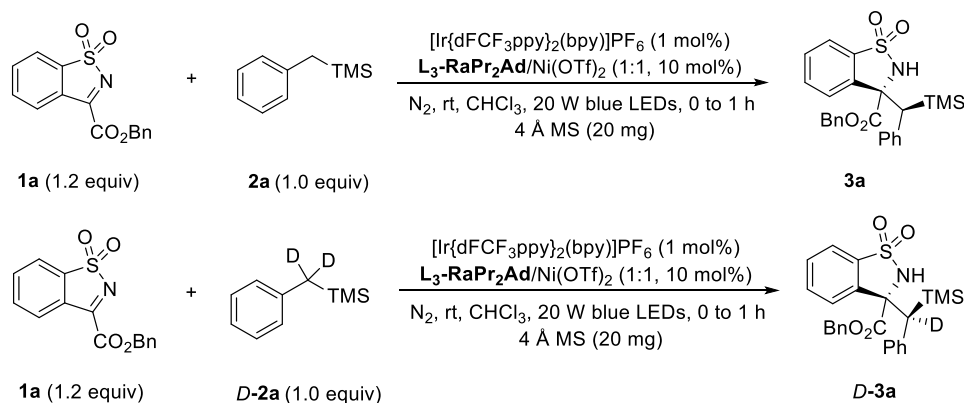

The reaction progress of benzyltrimethylsilane **2a** and *D*-benzyltrimethylsilane **2a** with benzosultam **1a** was monitored in parallel at six distinct periods (10 min, 20 min, 30 min, 40 min, 50 min and 1 h).  $[\text{Ir}\{\text{dFCF}_3\text{ppy}\}_2(\text{bpy})]\text{PF}_6$  (1 mol%),  $\text{Ni}(\text{OTf})_2/\text{L}_3\text{-RaPr}_2\text{Ad}$  (1:1, 10 mol%), **1a** (0.12 mmol), **2a** or *D-2a* (0.10 mmol), and 4 Å MS (20 mg) in  $\text{CHCl}_3$  (1.0 mL) at rt under the irradiation of 20 W blue LEDs for 0–1 h. After the reaction was completed, the suspension was filtered through a sand core funnel, and the filtrate was concentrated under vacuum. The residue was detected by  $^1\text{H}$  NMR analysis ( $\text{CH}_2\text{Br}_2$  as the internal standard). The KIE of the reaction, which was calculated by dividing the rate constant of the reaction of benzyltrimethylsilane ( $Y1:k_{\text{H}} = 1.47$ ) by that of *D*-benzyltrimethylsilane ( $Y2:k_{\text{D}} = 1.01$ ), was determined to be 1.46.

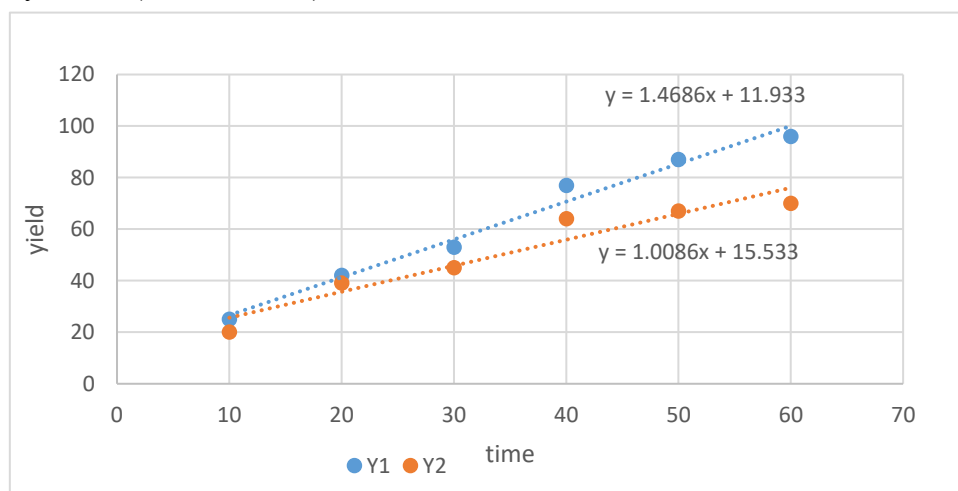

Figure S9. Parallel KIE experiments

## 8.7 Cyclic voltammetry analysis

Cyclic voltammograms for mechanistic analysis were carried out with a  $\mu\text{Stat-i 400s}$  potentiostat by a three-electrode cell with a glassy carbon working electrode, a platinum mesh counter electrode, and an  $\text{Ag}/\text{AgNO}_3$  reference electrode at room temperature in  $\text{CH}_3\text{CN}$ .  $n\text{-Bu}_4\text{NPF}_6$  (0.1 M) was used as the supporting electrolyte, and a Glass Carbon electrode was used as the working electrode. The scan rate was  $100 \text{ mV s}^{-1}$ . The experimental setup was calibrated using ferrocene ( $\text{Fc}/\text{Fc}^+$ ) prior to each experiment. Samples were prepared with 0.3 mmol substrate in 10 mL  $n\text{-Bu}_4\text{NPF}_6$  electrolyte

(0.03 M in CH<sub>3</sub>CN) and degassed by sparging with nitrogen gas for 10 min prior to use. The potential ( $E_{p/2}$ ) was determined and converted to SCE as described by Nicewicz<sup>10</sup>.

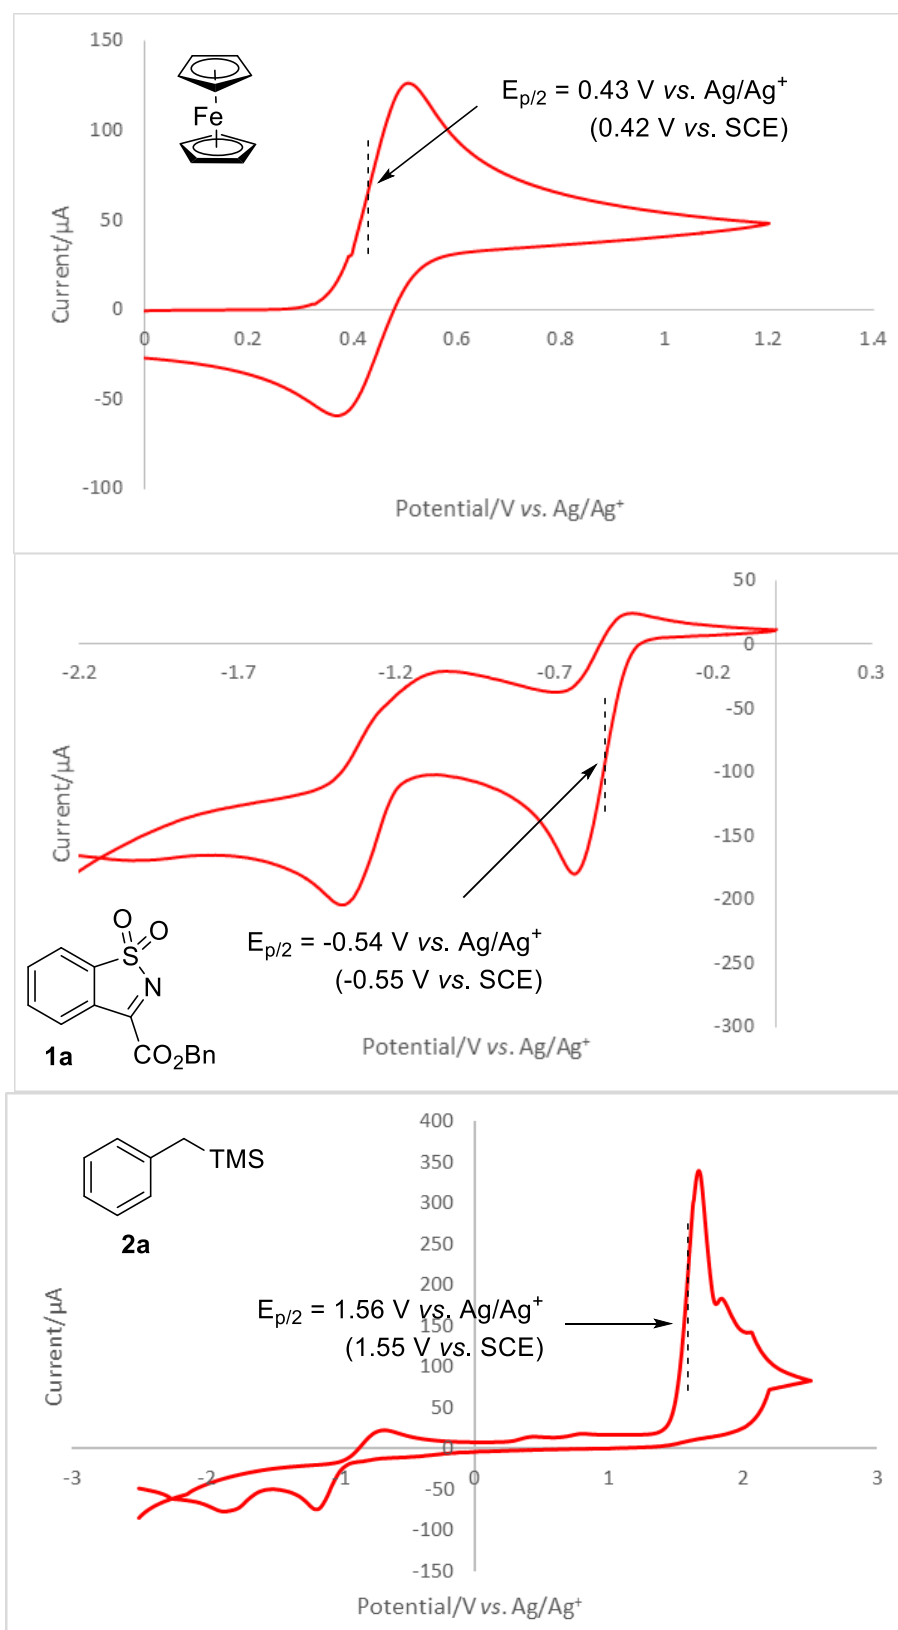

Figure S10. Cyclic voltammogram of **1a** and **2a**

## 8.8 Quantum yield measurement

### General Protocol to assess the photon flux of LED:

The photon flux set by the LED ( $\lambda = 420$  nm, 20 W) was determined using the standard potassium ferric oxalate photometric method, following a modified literature procedure<sup>11</sup>.

A 0.018 M potassium ferric oxalate solution was prepared by dissolving 178 mg of potassium ferric oxalate trihydrate and 84  $\mu$ L of H<sub>2</sub>SO<sub>4</sub> (95–98%) in 20 mL of water. This solution was kept in an amber bottle in the dark. Then a buffer solution was prepared by dissolving 2.5 g of sodium acetate and 0.50 mL of H<sub>2</sub>SO<sub>4</sub> (95–98%) in 50 mL of water.

1.0 mL of the 0.018 M potassium ferric oxalate solution was added to a flask containing a stirring bar. Then, the solution was irradiated for 0 s, 30 s, 60 s. Immediately after irradiation, 100  $\mu$ L of the solution was transferred to a foil-covered 10 mL volumetric flask in which containing 15 mg of 1,10-phenanthroline dissolved in 3.0 mL of the buffer solution. Then add water to the flask to bring the total volume to 10 mL. The flask was shaken to ensure efficient mixing and the solution was stored in the dark for approximately 20 min. 2.0 mL of the solution was transferred to a quartz cuvette (1.0 mL path length) and the absorbance at  $\lambda = 510$  nm was measured by UV/Vis spectroscopy (**Figure S11**). This process was repeated for 30 s, 60 s, and the absorbance of a unirradiated sample was also measured.

**Caution: minimizing exposure to background light!**

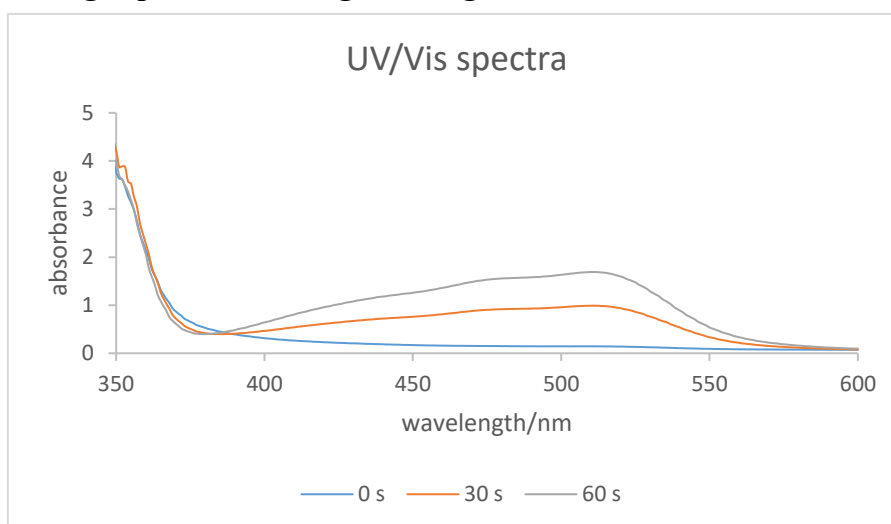

**Figure S11.** UV/Vis spectra of potassium ferric oxalate/1,10-phenanthroline solutions

The number of moles of Fe<sup>2+</sup> produced by light irradiation was calculated using:

$$\text{mol Fe}^{2+} = \frac{V_1 V_3 \Delta A (510 \text{ nm})}{V_2 l \varepsilon (510 \text{ nm})}$$

Where

$V_1$  = the volume of potassium ferric oxalate solution irradiated ( $1.0 \times 10^{-3}$  L).

$V_2$  = the volume of the solution taken for measurement of the Fe<sup>2+</sup> ions ( $1.0 \times 10^{-4}$  L).

$V_3$  = the final volume of solution after complexation with 1,10-phenanthroline ( $1.0 \times 10^{-2}$  L).

$\Delta A (510 \text{ nm})$  = the absorbance difference at  $\lambda = 510$  nm between the irradiated solution and the solution kept in dark.

$l$  = the optical path length of the cuvette (1.0 cm).

$\epsilon$  (510 nm) = the molar absorption coefficient of the  $\text{Fe}(\text{phen})_3^{2+}$  complex at  $\lambda = 510 \text{ nm}$  ( $1.11 \times 10^4 \text{ L mol}^{-1} \text{ cm}^{-1}$ ).

The moles of  $\text{Fe}^{2+}$  were plotted as a function of time (**Figure. S12**)

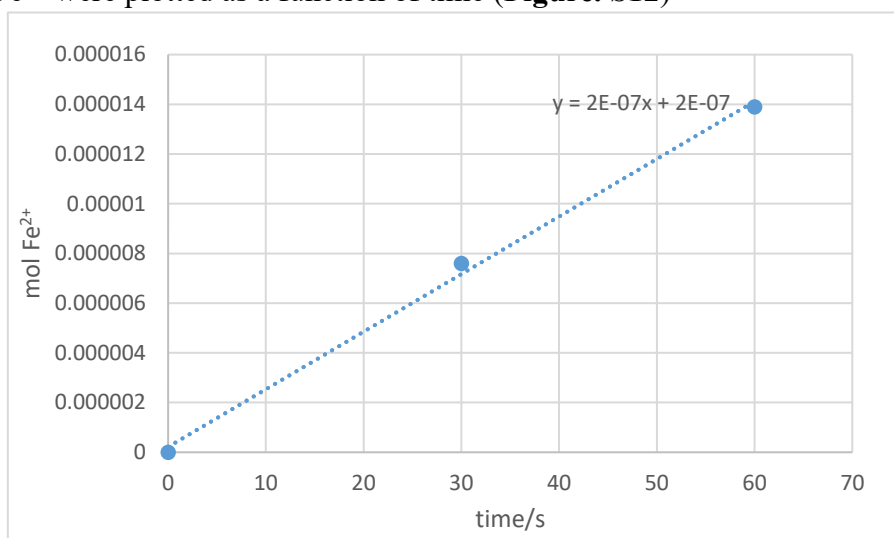

**Figure S12.** The molar number of  $\text{Fe}^{2+}$  as a function of time

The photon flux was then calculated using:

$$\text{photon flux} = \frac{\text{mol Fe}^{2+}}{\Phi t (1 - 10^{-A})}$$

Where

$\Phi$  = the quantum yield of the potassium ferric oxalate in room temperature at 420 nm is 1.13.<sup>12</sup>

$t$  = the irradiated time(s).

$A$  = the potassium ferric oxalate absorbance at 420 nm, which was measured placing 1 mL of the solution in a cuvette which path length is 1 cm by UV/Vis spectrophotometry. We obtained an absorbance value of 1.706.

$$\text{photon flux} = \frac{2.0 \times 10^{-7}}{1.13 \times (1 - 10^{-1.706})} = 1.81 \times 10^{-7}$$

### Quantum yield of radical reaction:

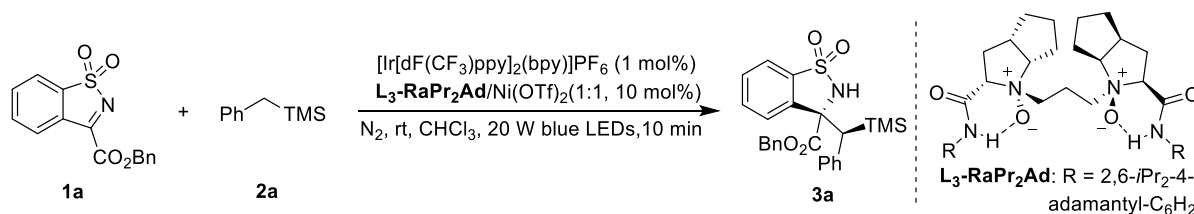

An oven-dried reaction tube was charged with *N*-sulfonyl cyclic ketimines **1a** (0.12 mmol), alkyl silanes **2a** (0.10 mmol),  $[\text{Ir}\{\text{dFCF}_3\text{ppy}\}_2(\text{bpy})]\text{PF}_6$  (1 mol%),  $\text{L}_3\text{-RaPr}_2\text{Ad}$  (10 mol%),  $\text{Ni}(\text{OTf})_2$  (10 mol%), 4 Å MS (20 mg) and  $\text{CHCl}_3$  (1.0 mL). The mixture was stirred under 420 nm 20 W blue LED irradiation at room temperature. After 10 minutes, the yield of **3a** was determined by  $^1\text{H}$ NMR, using

dibromomethane as an internal standard. And  $2.5 \times 10^{-5}$  mol **3a** was produced. The quantum yield ( $\phi$ ) of this reaction was calculated using the following equation:

$$\phi = \frac{\text{mol product}}{\text{photon flux} \times t \times (1 - 10^{-A})}$$

Where

$\Phi$  = the quantum yield of the catalytic reaction in room temperature at 420 nm.

t = the reaction time(s).

A = the catalytic reaction absorbance at 420 nm, which was measured placing 1 mL of the solution in a cuvette which path length is 1 cm by UV/Vis spectrophotometry. We obtained an absorbance value of 1.954

$$\phi = \frac{2.5 \times 10^{-5}}{1.81 \times 10^{-7} \times 600 \times (1 - 10^{-1.954})} = 2.30 \times 10^{-1}$$

## 8.9 Catalytic cycle

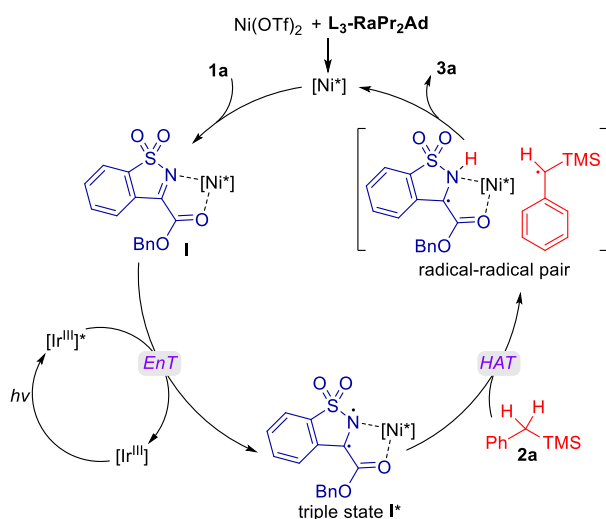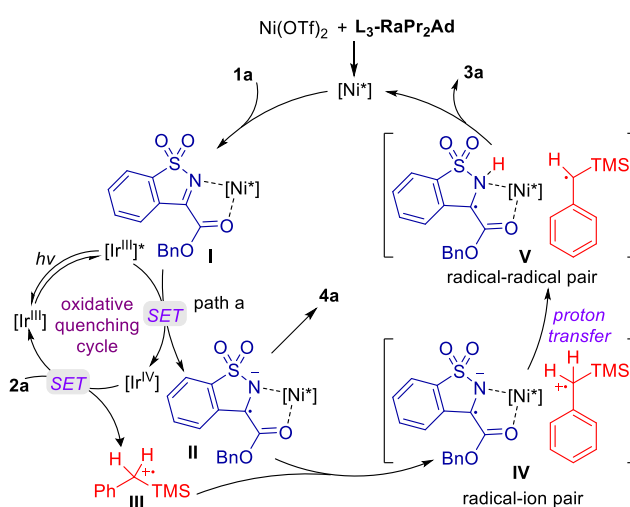

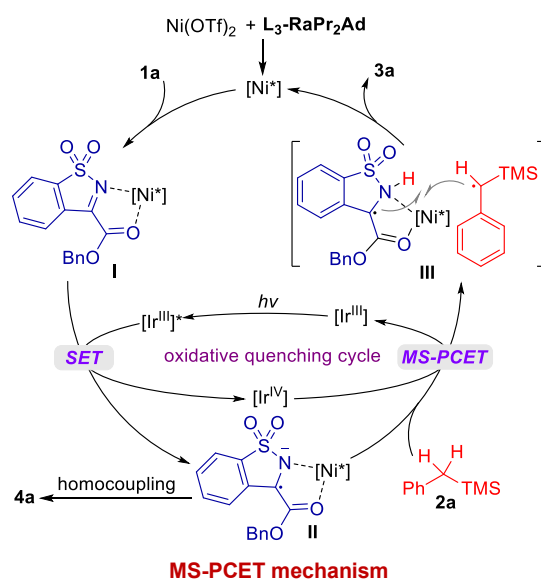

Figure S12. Three possible cycle of reaction

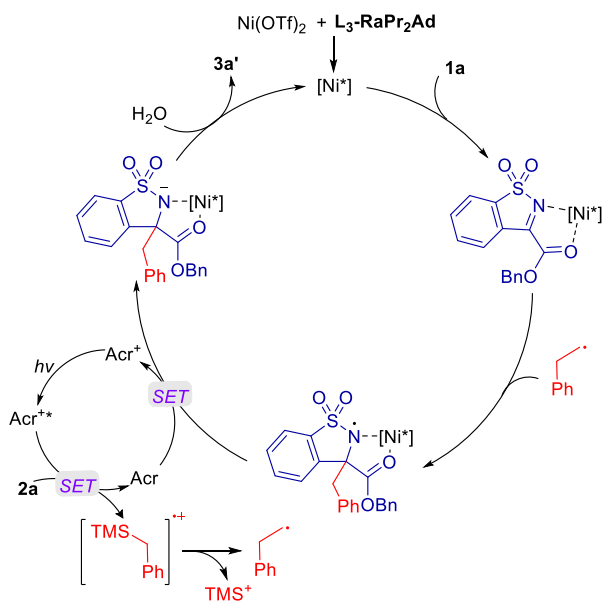

## 9. Product derivation

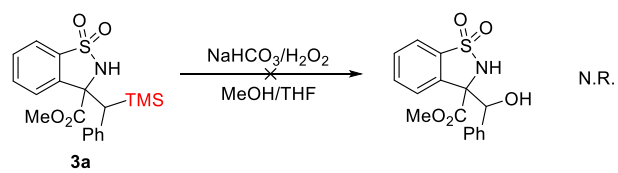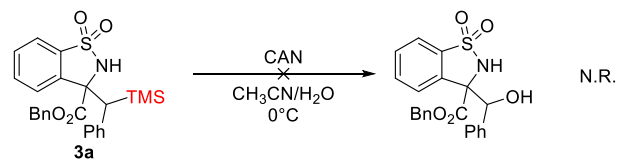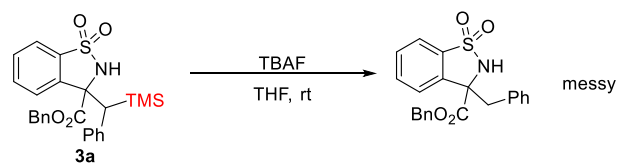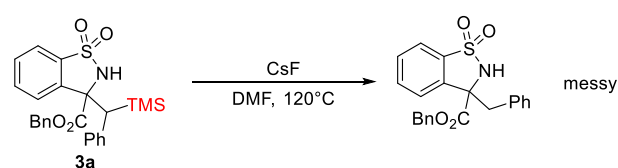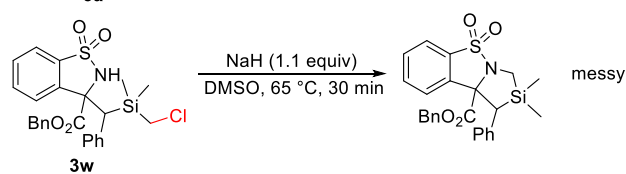



## 10. Single-crystal data

### Crystallographic Data for C<sub>38</sub>H<sub>46</sub>N<sub>2</sub>O<sub>8</sub>S<sub>2</sub>Si<sub>2</sub>

|                                                   |                                                                                                  |
|---------------------------------------------------|--------------------------------------------------------------------------------------------------|
| Formula                                           | 2(C <sub>38</sub> H <sub>46</sub> N <sub>2</sub> O <sub>8</sub> S <sub>2</sub> Si <sub>2</sub> ) |
| Formula mass (amu)                                | 779.07                                                                                           |
| Space group                                       | P 21 21 21                                                                                       |
| <i>a</i> (Å)                                      | 11.6468(8)                                                                                       |
| <i>b</i> (Å)                                      | 16.5589(12)                                                                                      |
| <i>c</i> (Å)                                      | 21.0550(17)                                                                                      |
| <i>α</i> (deg)                                    | 90                                                                                               |
| <i>β</i> (deg)                                    | 90                                                                                               |
| <i>γ</i> (deg)                                    | 90                                                                                               |
| <i>V</i> (Å <sup>3</sup> )                        | 4060.6(5)                                                                                        |
| <i>Z</i>                                          | 4                                                                                                |
| <i>λ</i> (Å)                                      | 0.71073                                                                                          |
| <i>T</i> (K)                                      | 173 K                                                                                            |
| $\rho_{\text{calcd}}$ (g cm <sup>-3</sup> )       | 1.274                                                                                            |
| $\mu$ (mm <sup>-1</sup> )                         | 0.241                                                                                            |
| Transmission factors                              | 0.878,0.981                                                                                      |
| $\theta_{\text{max}}$ (deg)                       | 25.368                                                                                           |
| No. of unique data, including $F_o^2 < 0$         | 7419                                                                                             |
| No. of unique data, with $F_o^2 > 2\sigma(F_o^2)$ | 7187                                                                                             |
| No. of variables                                  | 485                                                                                              |
| $R(F)$ for $F_o^2 > 2\sigma(F_o^2)$ <sup>a</sup>  | 0.0328                                                                                           |
| $R_w(F_o^2)$ <sup>b</sup>                         | 0.0759                                                                                           |
| Goodness of fit                                   | 1.103                                                                                            |

$$^a R(F) = \sum ||F_o| - |F_c|| / \sum |F_o|.$$

$$^b R_w(F_o^2) = [\sum [w(F_o^2 - F_c^2)^2] / \sum wF_o^4]^{1/2}; w^{-1} = [\sigma^2(F_o^2) + (Ap)^2 + Bp], \text{ where } p = [\max(F_o^2, 0) + 2F_c^2] / 3.$$

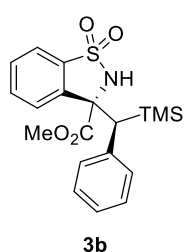

≡

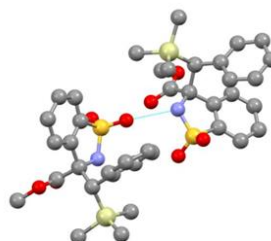

## 11. References

- [1] Y. H. Wen, X. Huang, J. L. Huang, Y. Xiong, B. Qin, X. M. Feng, *Synlett* 2005, **16**, 2445.
- [2] X. H. Liu, L. L. Lin, X. M. Feng, *Acc. Chem. Res.* 2011, **44**, 574.
- [3] X. H. Liu, L. L. Lin, X. M. Feng, *Org. Chem. Front.* 2014, **1**, 298.
- [4] S. Zhang, L. Li, Y. Hu, *Org. Lett.* 2015, **17**, 1050.
- [5] Z. P. Zhang, Z. Y. Han, G. X. Gu, X. Q. Dong, X. M. Zhang, *Adv. Synth. Catal.* 2017, **359**, 2585.
- [6] N. D'Alessandro, A. Albin, P. S. Mariano, *Org. Chem.* 1993, **58**, 937.
- [7] Y. Wu, S. Bouvet, S. Izquierdo, *Angew. Chem. Int. Ed.* 2019, **58**, 2617.
- [8] H. Bock, H. Alt, H. Seidl, *J. Am. Chem. Soc.* 1969, **91**, 355.
- [9] M. Silvi, M. Paolo, *Nat. Chem.* 2017, **9**, 868.
- [10] H. G. Roth, N. A. Romero, D. A. Nicewicz, *Synlett* 2016, **27**, 714.
- [11] A. Tlahuext-Aca, F. Glorius, *Org. Lett.* 2018, **20**, 1546.
- [12] Ernst E. Wegner, Adamson, W. Arthur, *J. Am. Chem. Soc.* 1966, **88**, 394.

## 12. Characterization of typical substrates 1a-1h

### benzyl benzo[*d*]isothiazole-3-carboxylate 1,1-dioxide(1a)

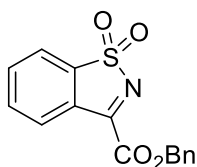

White solid, m.p. 130 – 131 °C; <sup>1</sup>H NMR (400 MHz, CDCl<sub>3</sub>) δ 8.26 (d, *J* = 8.0 Hz, 1H), 7.92 (d, *J* = 4.0 Hz, 1H), 7.79-7.72 (m, 2H), 7.49-7.47 (m, 2H), 7.44-7.37 (m, 3H), 5.49 (s, 2H).; <sup>13</sup>C NMR (101 MHz, CDCl<sub>3</sub>) δ 160.3, 156.0, 140.2, 134.3, 134.2, 133.8, 129.1, 128.8, 128.2, 127.6, 123.0, 69.2.

HRMS (ESI<sup>+</sup>) *m/z* calcd for C<sub>15</sub>H<sub>11</sub>NNaO<sub>4</sub>S<sup>+</sup> ([M+Na<sup>+</sup>]) = 324.0301, Found 324.0299.

IR (film, cm<sup>-1</sup>) : 3035, 1736, 1348, 1202, 1178, 1028, 763, 700, 579, 532.

### benzyl 5-methylbenzo[*d*]isothiazole-3-carboxylate 1,1-dioxide(1b)

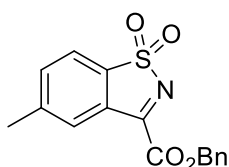

White solid, m.p. 106 – 108 °C; <sup>1</sup>H NMR (400 MHz, CDCl<sub>3</sub>) δ 8.04 (s, 1H), 7.80 (d, *J* = 8.0 Hz, 1H), 7.56 (d, *J* = 8.0 Hz, 1H), 7.50-7.47 (m, 2H), 7.44 – 7.37 (m, 3H), 5.49 (s, 2H), 2.51 (s, 3H).; <sup>13</sup>C NMR (101 MHz, CDCl<sub>3</sub>) δ 160.4, 160.1, 145.7, 137.4, 134.6, 133.9, 129.1, 128.8, 128.7, 127.9, 122.8, 69.1, 21.8.

HRMS (ESI<sup>+</sup>) *m/z* calcd for C<sub>16</sub>H<sub>13</sub>NNaO<sub>4</sub>S<sup>+</sup> ([M+Na<sup>+</sup>]) = 338.0458, Found 338.0457.

IR (film, cm<sup>-1</sup>) : 3270, 1743, 1310, 1238, 1186, 1147, 1102, 896, 822, 736, 699, 572.

### benzyl 6-methylbenzo[*d*]isothiazole-3-carboxylate 1,1-dioxide(1c)

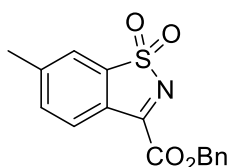

White solid, m.p. 107 – 108 °C; <sup>1</sup>H NMR (400 MHz, CDCl<sub>3</sub>) δ 8.04 (d, *J* = 8.0 Hz, 1H), 7.66 (s, 1H), 7.46 – 7.40 (m, 3H), 7.36-7.29 (m, 3H), 5.41 (s, 2H), 2.46 (s, 3H).; <sup>13</sup>C NMR (101 MHz, CDCl<sub>3</sub>) δ 160.4, 160.0, 146.3, 140.7, 134.9, 133.9, 129.1, 128.8, 127.23, 125.9, 123.7, 69.1, 21.8.

HRMS (ESI<sup>+</sup>) *m/z* calcd for C<sub>16</sub>H<sub>13</sub>NNaO<sub>4</sub>S<sup>+</sup> ([M+Na<sup>+</sup>]) = 338.0458, Found 338.0454.

IR (film, cm<sup>-1</sup>) : 2963, 1735, 1345, 1206, 1170, 1022, 837, 804, 698, 572.

### benzyl 7-chlorobenzo[*d*]isothiazole-3-carboxylate 1,1-dioxide(1d)

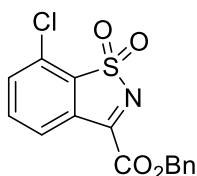

White solid, m.p. 129 – 130 °C; <sup>1</sup>H NMR (400 MHz, CDCl<sub>3</sub>) δ 8.14 – 8.09 (m, 1H), 7.63 – 7.59 (m, 2H), 7.42 – 7.40 (m, 2H), 7.38 – 7.33 (m, 3H), 5.42 (s, 2H).; <sup>13</sup>C NMR (101 MHz, CDCl<sub>3</sub>) δ 160.0, 158.6, 137.6, 135.78, 134.8, 133.6, 131.2, 130.3, 129.2, 128.9, 125.7, 69.3.

HRMS (ESI<sup>+</sup>) *m/z* calcd for C<sub>15</sub>H<sub>10</sub><sup>35</sup>ClNNaO<sub>4</sub>S<sup>+</sup> ([M+Na<sup>+</sup>]) = 357.9912, Found 357.9911.

HRMS (ESI<sup>+</sup>) *m/z* calcd for C<sub>15</sub>H<sub>10</sub><sup>37</sup>ClNNaO<sub>4</sub>S<sup>+</sup> ([M+Na<sup>+</sup>]) = 359.9882, Found 359.9884.

IR (film, cm<sup>-1</sup>) : 2963, 1736, 1356, 1179, 1060, 794, 699, 580.

### benzyl 7-(trifluoromethyl)benzo[*d*]isothiazole-3-carboxylate 1,1-dioxide(1e)

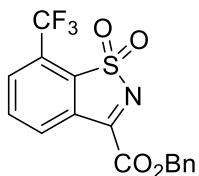

White solid, m.p. 101 – 102 °C; <sup>1</sup>H NMR (600 MHz, CDCl<sub>3</sub>) δ 8.55 (d, *J* = 6.0 Hz, 1H), 7.99 (d, *J* = 12.0 Hz, 1H), 7.92 (t, *J* = 6.0 Hz, 1H), 7.49 (d, *J* = 6.4 Hz, 2H), 7.50 – 7.48(m, 3H), 5.51 (s, 2H).; <sup>13</sup>C NMR (151 MHz, CDCl<sub>3</sub>) δ 160.0, 158.4, 137.9, 135.3, 133.6, 131.1 (q, *J* = 3.7 Hz), 130.8, 129.5, 129.3, 128.9, 128.9, 127.8 (q, *J* = 36.9 Hz), 122.8, 121.0, 69.5; <sup>19</sup>F NMR (565 MHz, CDCl<sub>3</sub>) δ -60.0. (s, 3F).

**HRMS** (ESI<sup>+</sup>) *m/z* calcd for C<sub>16</sub>H<sub>10</sub>F<sub>3</sub>NNaO<sub>4</sub>S<sup>+</sup> ([M+Na<sup>+</sup>]) = 392.0175, Found 392.0180.

**IR** (film, cm<sup>-1</sup>) : 3093, 1739, 1365, 1321, 1180, 1140, 825, 806, 702, 574.

### benzyl 7-fluorobenzo[*d*]isothiazole-3-carboxylate 1,1-dioxide(1f)

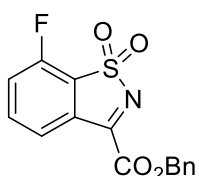

White solid, m.p. 123 – 124 °C; <sup>1</sup>H NMR (400 MHz, CDCl<sub>3</sub>) δ 8.08 (d, *J* = 8.0 Hz, 1H), 7.78 – 7.73 (m, 1H), 7.48 – 7.40 (m, 6H), 5.49 (s, 2H).; <sup>13</sup>C NMR (101 MHz, CDCl<sub>3</sub>) δ 159.9, 158.8, 157.2 (d, *J* = 262.2 Hz), 137.5 (d, *J* = 6.9 Hz), 133.7, 130.9, 129.2, 128.9, 128.9, 126.3 (d, *J* = 21.0 Hz), 123.5 (d, *J* = 3.4 Hz), 122.2 (d, *J* = 19.6 Hz), 69.4; <sup>19</sup>F NMR (377 MHz, CDCl<sub>3</sub>) δ -111.0. (s, 1F)

**HRMS** (ESI<sup>+</sup>) *m/z* calcd for C<sub>15</sub>H<sub>10</sub>FNNaO<sub>4</sub>S<sup>+</sup> ([M+Na<sup>+</sup>]) = 342.0207, Found 342.0207.

**IR** (film, cm<sup>-1</sup>) : 3087, 1737, 1498, 1358, 1261, 1222, 1180, 1108, 841, 755, 700, 522.

### benzyl naphtho[2,3-*d*]isothiazole-3-carboxylate 1,1-dioxide(1g)

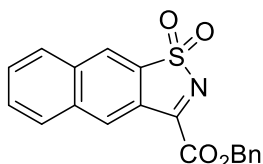

White solid, m.p. 207 – 208 °C; <sup>1</sup>H NMR (400 MHz, CDCl<sub>3</sub>) δ 8.78 (s, 1H), 8.39 (s, 1H), 8.05 (t, *J* = 8.0 Hz, 2H), 7.82 – 7.74 (m, 2H), 7.54 – 7.51 (m, 2H), 7.45 – 7.40 (m, 3H), 5.54 (s, 2H).; <sup>13</sup>C NMR (151 MHz, CDCl<sub>3</sub>) δ 160.5, 160.0, 134.8, 134.6, 134.1, 133.9, 131.2, 131.0, 123.0, 129.9, 129.8, 129.1, 128.9, 125.0, 124.5, 69.1.

**HRMS** (FTMS+*c* ESI, *m/z*) calcd for C<sub>19</sub>H<sub>13</sub>NNaO<sub>4</sub>S<sup>+</sup> ([M+Na<sup>+</sup>]) = 374.0458, Found 374.0455.

**IR** (neat): (cm<sup>-1</sup>) 3066, 1740, 1340, 1171, 754, 602, 471.

## 12. Characterization of the products

### benzyl 3-(phenyl(trimethylsilyl)methyl)-2,3-dihydrobenzo[*d*]isothiazole-3-carboxylate 1,1-dioxide(3a)

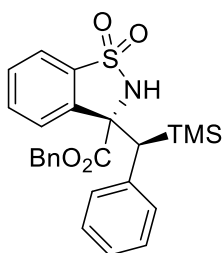

White amorphous solid, 44.2 mg, 95% yield, 95% ee, 88:12 dr, m.p. 150–152 °C.  $[\alpha]_D^{20} = -57.5$  ( $c = 0.74$ ,  $\text{CH}_2\text{Cl}_2$ ); SFC Chiralcel OX-3,  $\text{CO}_2/\text{MeOH} = 90/10$ , 1.5 mL/min,  $\lambda = 220$  nm,  $t_1 = 9.11$  min,  $t_2 = 10.70$  min,  $t_3 = 13.06$  min,  $t_4 = 15.62$  min;

$^1\text{H NMR}$  (600 MHz,  $\text{CDCl}_3$ )  $\delta$  7.52 (d,  $J = 6.0$  Hz, 1H), 7.43 (d,  $J = 6.0$  Hz, 1H), 7.38 – 7.35 (m, 3H), 7.34 – 7.30 (m, 3H), 7.29 – 7.27 (m, 3H), 7.24 – 7.23 (m, 1H), 7.20 – 7.16 (m, 1H),

7.00 (t,  $J = 6.0$  Hz, 2H), 6.91 (t,  $J = 6.0$  Hz, 1H), 5.83 (s, 1H), 5.22 (dd,  $J_1 = 12.0$ ,  $J_2 = 30.0$  Hz, 2H), 3.31 (s, 1H), 0.00 (s, 9H).

$^{13}\text{C NMR}$  (151 MHz,  $\text{CDCl}_3$ )  $\delta$  170.9, 166.6, 164.0, 140.1, 140.0, 136.8, 133.9, 130.7, 129.3, 129.0, 128.9, 128.2, 126.3, 123.4, 123.3, 118.3, 118.1, 113.4, 113.2, 72.0, 70.0, 44.7, 0.9.

IR (film,  $\text{cm}^{-1}$ ) : 3280, 2956, 1734, 1307, 1249, 1220, 1169, 845, 754, 703;

HRMS (ESI<sup>+</sup>)  $m/z$  calcd for  $\text{C}_{25}\text{H}_{27}\text{NNaO}_4\text{SSi}^+$  ( $[\text{M}] + \text{Na}^+$ ) = 488.1323, found 488.1324.

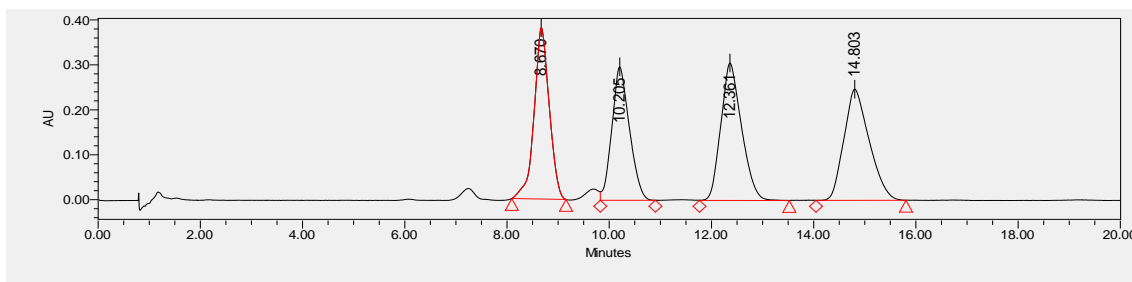

|   | Retention Time | Area    | % Area |
|---|----------------|---------|--------|
| 1 | 8.670          | 7105578 | 22.73  |
| 2 | 10.205         | 7076041 | 22.63  |
| 3 | 12.361         | 8585482 | 27.46  |
| 4 | 14.803         | 8500149 | 27.19  |

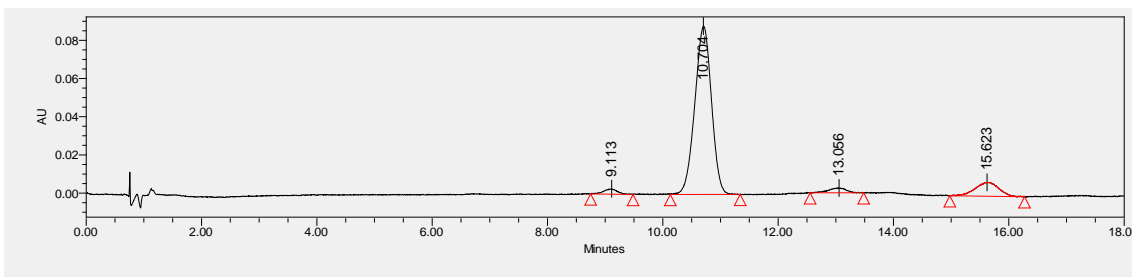

|   | Retention Time | Area    | % Area |
|---|----------------|---------|--------|
| 1 | 9.113          | 45460   | 2.19   |
| 2 | 10.704         | 1767611 | 85.16  |
| 3 | 13.056         | 54764   | 2.64   |
| 4 | 15.623         | 207921  | 10.02  |

**methyl 3-(phenyl(trimethylsilyl)methyl)-2,3-dihydrobenzo[*d*]isothiazole-3-carboxylate 1,1-dioxide(3b)**

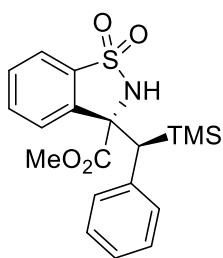

White amorphous solid, 38.1 mg, 98% yield, 96% ee, 83:17 dr, m.p. 181–183 °C.  $[\alpha]_D^{20} = -$

27.6 ( $c = 0.56$ ,  $\text{CH}_2\text{Cl}_2$ ); SFC Chiralcel OXH,  $\text{CO}_2/\text{MeOH} = 90/10$ , 1.0 mL/min,  $\lambda = 220$  nm,

$t_1 = 20.59$  min,  $t_2 = 26.98$  min,  $t_3 = 27.92$  min,  $t_4 = 39.92$  min;

$^1\text{H NMR}$  (400 MHz,  $\text{CDCl}_3$ )  $\delta$  7.48 (d,  $J = 8.0$  Hz, 2H), 7.38 (t,  $J = 8.0$  Hz, 1H), 7.29 – 7.24 (m, 2H), 7.18 – 7.14 (m, 1H), 6.98 (t,  $J = 8.0$  Hz, 2H), 6.89 (t,  $J = 8.0$  Hz, 1H), 5.79 (s, 1H),

3.82 (s, 3H), 3.27 (s, 1H), 0.00 (s, 9H).

$^{13}\text{C NMR}$  (101 MHz,  $\text{CDCl}_3$ )  $\delta$  172.0, 137.0, 136.6, 134.2, 133.0, 129.9, 127.9, 126.1, 125.9, 120.9, 72.2, 54.3, 44.5, -1.1.

IR (film,  $\text{cm}^{-1}$ ): 3276, 2956, 1736, 1306, 1246, 1206, 1169, 845, 756, 707;

HRMS (ESI<sup>+</sup>)  $m/z$  calcd for  $\text{C}_{19}\text{H}_{23}\text{NNaO}_4\text{SSi}^+$  ( $[\text{M}] + \text{Na}^+$ ) = 412.1010, found 412.1010.

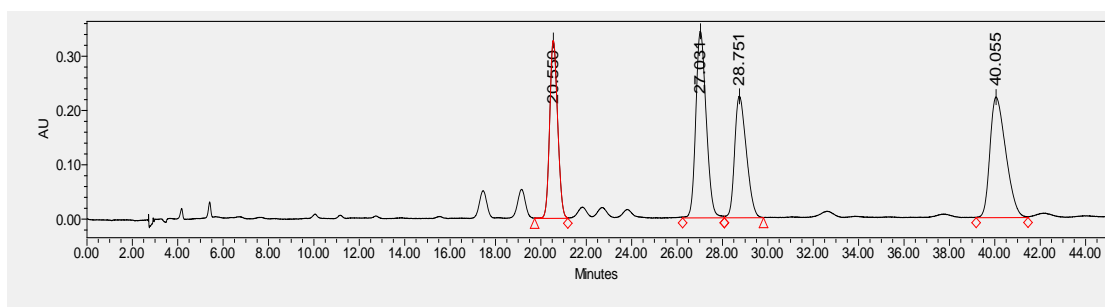

|   | Retention Time | Area     | % Area |
|---|----------------|----------|--------|
| 1 | 20.550         | 7962780  | 21.16  |
| 2 | 27.031         | 10912453 | 29.00  |
| 3 | 28.751         | 7982324  | 21.22  |
| 4 | 40.055         | 10767036 | 28.62  |

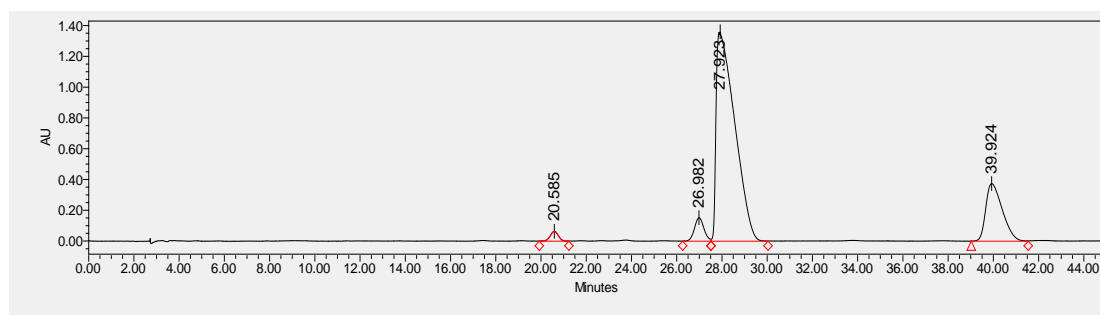

|   | Retention Time | Area     | % Area |
|---|----------------|----------|--------|
| 1 | 20.585         | 1628302  | 1.59   |
| 2 | 26.982         | 4454558  | 4.35   |
| 3 | 27.923         | 77398824 | 75.50  |
| 4 | 39.924         | 19038359 | 18.57  |

**ethyl 3-(phenyl(trimethylsilyl)methyl)-2,3-dihydrobenzo[d]isothiazole-3-carboxylate 1,1-dioxide(3c)**

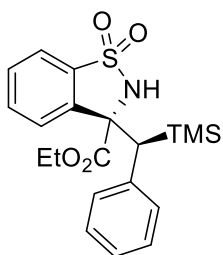

Colorless oil, 39.1 mg, 97% yield, 90% ee, 86:14 dr,  $[\alpha]_D^{20} = -18.5$  ( $c = 0.60$ ,  $\text{CH}_2\text{Cl}_2$ ); **SFC**

Chiralcel ID-3,  $\text{CO}_2/\text{MeOH} = 90/10$ , 1.5 mL/min,  $\lambda = 220$  nm,  $t_1 = 5.05$  min,  $t_2 = 5.41$  min,

$t_3 = 6.57$  min,  $t_4 = 7.23$  min;

**$^1\text{H NMR}$**  (400 MHz,  $\text{CDCl}_3$ )  $\delta$  7.45 (dd,  $J_1 = 4.0$  Hz,  $J_2 = 8.0$  Hz, 2H), 7.37 (t,  $J = 8.0$  Hz,

1H), 7.26 (t,  $J = 8.0$  Hz, 1H), 7.21 (s, 1H), 7.17 – 7.14 (m, 1H), 6.97 (t,  $J = 8.0$  Hz, 2H), 6.88

(t,  $J = 8.0$  Hz, 1H), 5.79 (s, 1H), 4.31 – 4.18 (m, 2H), 3.27 (s, 1H), 3.06 (s, 0H), 1.29 (t,  $J = 8.0$  Hz, 3H), 0.00 (s, 9H).

**$^{13}\text{C NMR}$**  (101 MHz,  $\text{CDCl}_3$ )  $\delta$  171.4, 137.1, 136.9, 134.3, 132.9, 129.8, 127.8, 126.1, 125.9, 120.9, 72.2, 63.8,

44.5, 13.9, -1.0.

**IR** (film,  $\text{cm}^{-1}$ ): 3275, 2959, 1730, 1306, 1240, 1206, 1169, 844, 756, 707;

**HRMS** (ESI<sup>+</sup>)  $m/z$  calcd for  $\text{C}_{20}\text{H}_{25}\text{NNaO}_4\text{SSi}^+$  ( $[\text{M}] + \text{Na}^+$ ) = 426.1166, found 426.1162.

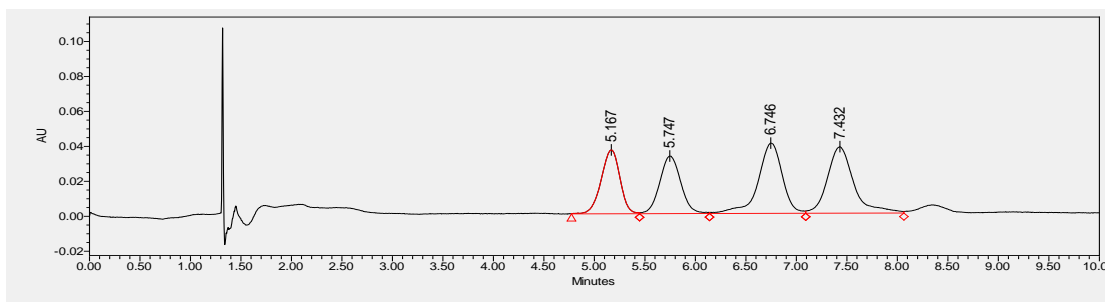

|   | Retention Time | Area   | % Area |
|---|----------------|--------|--------|
| 1 | 5.167          | 471587 | 20.49  |
| 2 | 5.747          | 476634 | 20.71  |
| 3 | 6.746          | 667927 | 29.02  |
| 4 | 7.432          | 685445 | 29.78  |

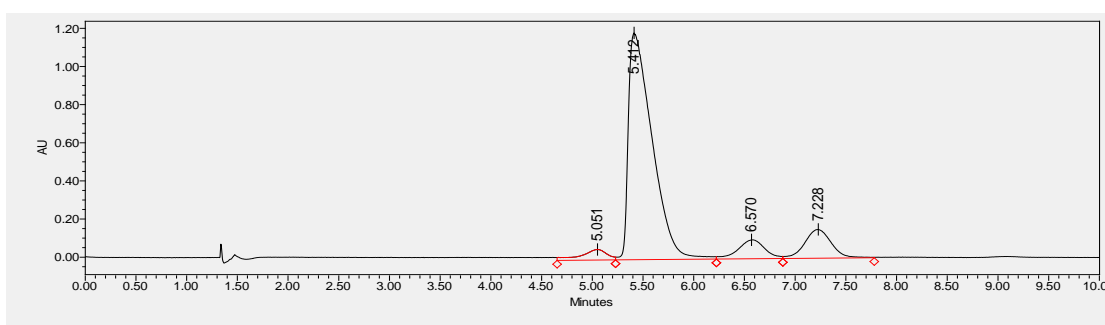

|   | Retention Time | Area     | % Area |
|---|----------------|----------|--------|
| 1 | 5.051          | 987860   | 3.96   |
| 2 | 5.412          | 19367332 | 77.67  |
| 3 | 6.570          | 1818022  | 7.29   |
| 4 | 7.228          | 2761707  | 11.08  |

**benzyl**      **5-methyl-3-(phenyl(trimethylsilyl)methyl)-2,3-dihydrobenzo[d]isothiazole-3-carboxylate 1,1-dioxide(3d)**

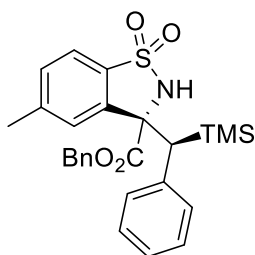

Colorless oil, 44.5mg, 93% yield, 88% ee, 88:12 dr,  $[\alpha]_D^{20} = -66.9$  ( $c = 0.73$ ,  $\text{CH}_2\text{Cl}_2$ );

SFC Chiralcel OX-3,  $\text{CO}_2/\text{MeOH} = 90/10$ , 1.5 mL/min,  $\lambda = 220$  nm,  $t_1 = 10.31$  min,  $t_2 = 12.32$  min,  $t_3 = 15.67$  min,  $t_4 = 17.98$  min;

$^1\text{H NMR}$  (400 MHz,  $\text{CDCl}_3$ )  $\delta$  7.42 – 7.40 (m, 1H), 7.38 – 7.34 (m, 3H), 7.32 – 7.30 (m, 2H), 7.23 – 7.19 (m, 2H), 7.09 (d,  $J = 8.0$  Hz, 2H), 7.01 (t,  $J = 8.0$  Hz, 2H), 6.92 (t,  $J = 8.0$

Hz, 1H), 5.79 (s, 1H), 5.23 (dd,  $J_1 = 12.0$  Hz,  $J_2 = 16.0$  Hz, 2H), 3.29 (s, 1H), 2.23 (s, 3H), 0.00 (s, 9H).

$^{13}\text{C NMR}$  (101 MHz,  $\text{CDCl}_3$ )  $\delta$  171.4, 143.8, 137.1, 136.9, 134.0, 131.7, 130.8, 128.9, 128.7, 128.6, 127.8, 126.3, 125.8, 120.6, 72.0, 69.3, 44.3, 21.6, -1.1.

IR (film,  $\text{cm}^{-1}$ ) : 3282, 2956, 1734, 1306, 1240, 1222, 1186, 1143, 843, 753, 701;

HRMS (ESI<sup>+</sup>)  $m/z$  calcd for  $\text{C}_{26}\text{H}_{29}\text{NNaO}_4\text{SSi}^+$  ( $[\text{M}] + \text{Na}^+$ ) = 502.1479, found 502.1479.

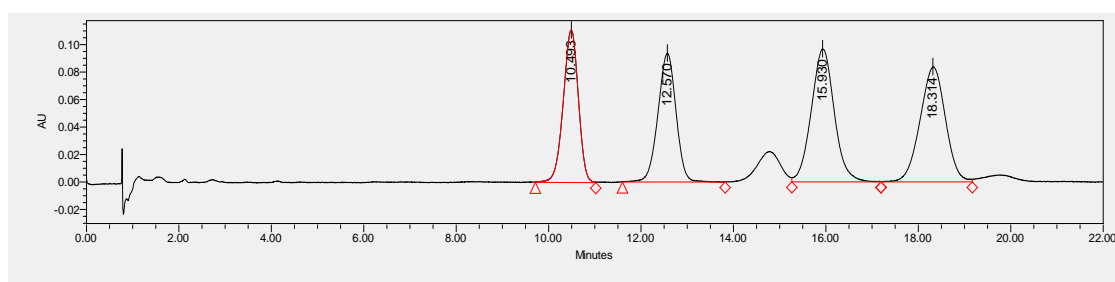

|   | Retention Time | Area    | % Area |
|---|----------------|---------|--------|
| 1 | 10.493         | 2511445 | 21.68  |
| 2 | 12.570         | 2537643 | 21.91  |
| 3 | 15.930         | 3345712 | 28.88  |
| 4 | 18.314         | 3188898 | 27.53  |

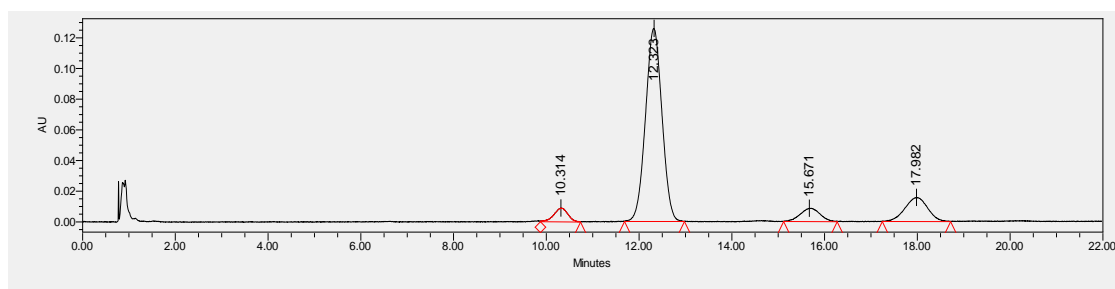

|   | Retention Time | Area    | % Area |
|---|----------------|---------|--------|
| 1 | 10.314         | 190461  | 4.66   |
| 2 | 12.323         | 3104158 | 75.87  |
| 3 | 15.671         | 257505  | 6.29   |
| 4 | 17.982         | 539352  | 13.18  |



**benzyl 6-methyl-3-(phenyl(trimethylsilyl)methyl)-2,3-dihydrobenzo[d]isothiazole-3-carboxylate 1,1-dioxide(3e)**

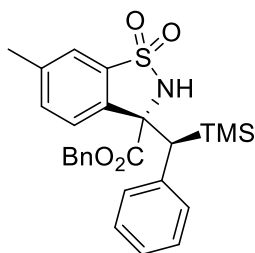

White amorphous solid, 27.8 mg, 58% yield, 84% ee, 80:20 dr, m.p. 75–78 °C.  $[\alpha]_D^{20} = -72.9$  ( $c = 0.14$ ,  $\text{CH}_2\text{Cl}_2$ ); **SFC** Chiralcel ODH,  $\text{CO}_2/\text{MeOH} = 93/7$ , 1.0 mL/min,  $\lambda = 220$  nm,  $t_1 = 19.40$  min,  $t_2 = 20.54$  min,  $t_3 = 23.07$  min,  $t_4 = 24.90$  min;

**$^1\text{H}$  NMR** (400 MHz,  $\text{CDCl}_3$ )  $\delta$  7.40 – 7.38 (m, 2H), 7.35 – 7.32 (m, 4H), 7.30 (s, 1H), 7.17 (d,  $J = 8.0$  Hz, 2H), 7.10 – 7.08 (m, 1H), 7.03 (t,  $J = 8.0$  Hz, 2H), 6.94 (t,  $J = 8.0$  Hz, 1H),

5.80 (s, 1H), 5.21 (dd,  $J_1 = 12.0$  Hz,  $J_2 = 20.0$  Hz, 2H), 3.29 (s, 1H), 2.27 (s, 3H), 0.00 (s, 9H).

**$^{13}\text{C}$  NMR** (101 MHz,  $\text{CDCl}_3$ )  $\delta$  171.5, 140.6, 137.2, 134.4, 134.1, 133.8, 128.9, 128.8, 128.6, 127.9, 125.9, 125.8, 120.8, 72.1, 69.4, 44.2, 21.1, -1.0.

**IR** (film,  $\text{cm}^{-1}$ ): 3279, 2955, 1735, 1307, 1250, 1223, 1161, 1143, 844, 750, 703;

**HRMS** (ESI<sup>+</sup>)  $m/z$  calcd for  $\text{C}_{26}\text{H}_{29}\text{NNaO}_4\text{SSi}^+$  ( $[\text{M}] + \text{Na}^+$ ) = 502.1479, found 502.1476.

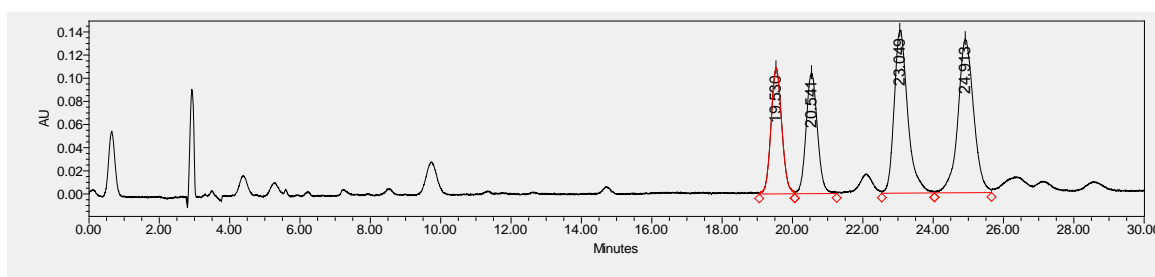

|   | Retention Time | Area    | % Area |
|---|----------------|---------|--------|
| 1 | 19.530         | 2317628 | 18.51  |
| 2 | 20.541         | 2324535 | 18.57  |
| 3 | 23.049         | 3768440 | 30.10  |
| 4 | 24.913         | 4109191 | 32.82  |

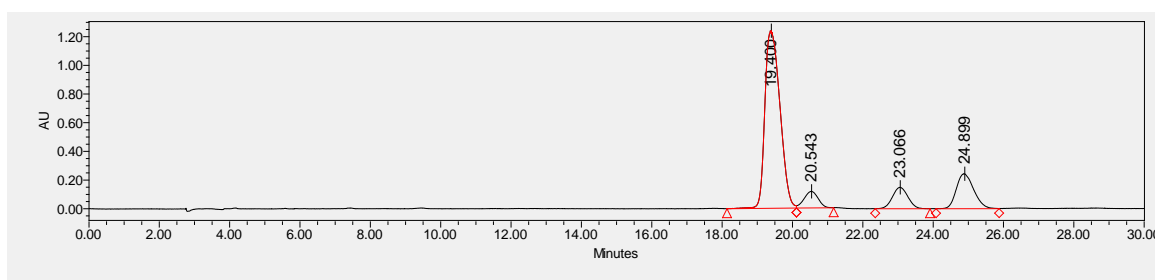

|   | Retention Time | Area     | % Area |
|---|----------------|----------|--------|
| 1 | 19.400         | 36810085 | 69.48  |
| 2 | 20.543         | 3206524  | 6.05   |
| 3 | 23.066         | 4591198  | 8.67   |
| 4 | 24.899         | 8369467  | 15.80  |

**methyl (S)-5-fluoro-3-((S)-phenyl(trimethylsilyl)methyl)-2,3-dihydrobenzo[d]isothiazole-3-carboxylate 1,1-dioxide(3f)**

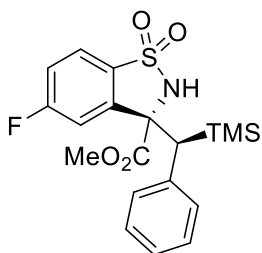

White amorphous solid, 26.8 mg, 66% yield, 96% ee, 94:6 dr, m.p. 186–188 °C [ $\alpha$ ]<sub>D</sub><sup>20</sup> =

-35.1 (*c* = 0.51, CH<sub>2</sub>Cl<sub>2</sub>); **HPLC** Daicel chiralcel IA, *n*-hexane/*i*-PrOH 95/5, 1.0 mL/min,

$\lambda$  = 220 nm, *t*<sub>1</sub> = 17.56 min, *t*<sub>2</sub> = 23.14 min, *t*<sub>3</sub> = 52.82 min, *t*<sub>4</sub> = 57.37 min;

**<sup>1</sup>H NMR** (400 MHz, CDCl<sub>3</sub>)  $\delta$  7.47 (dd, *J*<sub>1</sub> = 4.0 Hz, *J*<sub>2</sub> = 8.0 Hz, 1H), 7.31 – 7.23 (m, 1H), 7.15 (dd, *J*<sub>1</sub> = 2.2 Hz, *J*<sub>2</sub> = 8.0 Hz, 1H), 7.04 – 6.92 (m, 5H), 5.84 (s, 1H), 3.85 (s,

3H), 3.17 (s, 1H), -0.00 (s, 9H).

**<sup>13</sup>C NMR** (101 MHz, CDCl<sub>3</sub>)  $\delta$  171.4, 165.3 (d, *J* = 254.0 Hz), 140.0 (d, *J* = 10.0 Hz), 136.6, 130.4 (d, *J* = 2.0 Hz), 128.1, 126.2, 123.2 (d, *J* = 10.0 Hz), 118.1 (d, *J* = 24.0 Hz), 113.2 (d, *J* = 24.0 Hz), 71.7, 54.5, 44.8, -1.1.

**<sup>19</sup>F NMR** (377 MHz, CDCl<sub>3</sub>)  $\delta$  -103.8. (s, 1F).

**IR** (film, cm<sup>-1</sup>) : 3279, 2954, 1739, 1302, 1245, 1203, 1173, 851, 754, 710;

**HRMS** (ESI<sup>+</sup>) *m/z* calcd for C<sub>19</sub>H<sub>22</sub>FNNaO<sub>4</sub>SSi<sup>+</sup> ([M]<sup>+</sup>+Na<sup>+</sup>) = 430.0916, found 430.0918.

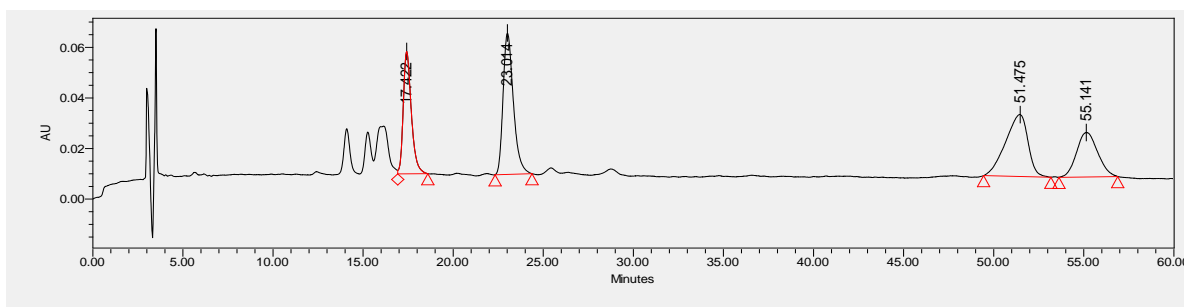

|   | Retention Time | Area    | % Area |
|---|----------------|---------|--------|
| 1 | 17.422         | 1508518 | 20.71  |
| 2 | 23.014         | 2216745 | 30.43  |
| 3 | 51.475         | 2123246 | 29.15  |
| 4 | 55.141         | 1435188 | 19.70  |

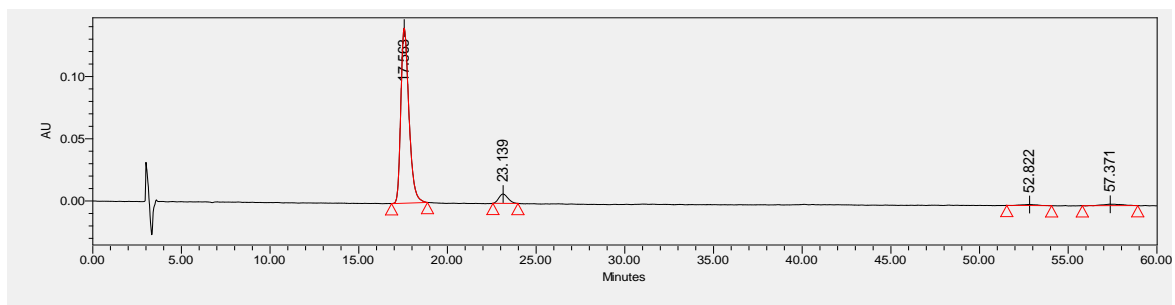

|   | Retention Time | Area    | % Area |
|---|----------------|---------|--------|
| 1 | 17.563         | 4477207 | 91.52  |
| 2 | 23.139         | 272720  | 5.57   |
| 3 | 52.822         | 52248   | 1.07   |
| 4 | 57.371         | 89841   | 1.84   |

**benzyl 7-fluoro-3-(phenyl(trimethylsilyl)methyl)-2,3-dihydrobenzo[d]isothiazole-3-carboxylate 1,1-dioxide(3g)**

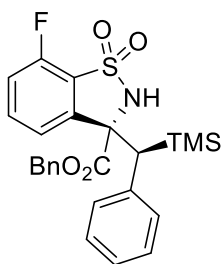

Colorless oil, 37.1 mg, 77% yield, 96% ee, 81:19 dr,  $[\alpha]_D^{20} = -50.0$  ( $c = 0.55$ ,  $\text{CH}_2\text{Cl}_2$ ); **HPLC**

Daicel chiralcel ADH, *n*-hexane/*i*-PrOH 95/5, 1.0 mL/min,  $\lambda = 220$  nm,  $t_1 = 19.14$  min,  $t_2 =$

$21.54$  min,  $t_3 = 23.36$  min,  $t_4 = 33.57$  min;

**$^1\text{H}$  NMR** (400 MHz,  $\text{CDCl}_3$ )  $\delta$  7.39 – 7.37 (m, 3H), 7.35 – 7.32 (m, 3H), 7.21 (d,  $J = 8.0$  Hz, 2H), 7.09 (d,  $J = 8.0$  Hz, 1H), 7.04 (t,  $J = 8.0$  Hz, 2H), 6.97 – 6.92 (m, 2H), 5.92 (s, 1H), 5.24

(dd,  $J_1 = 12.0$  Hz,  $J_2 = 24.0$  Hz, 2H), 3.29 (s, 1H), 0.00 (s, 9H).

**$^{13}\text{C}$  NMR** (101 MHz,  $\text{CDCl}_3$ )  $\delta$  170.9, 155.8 (d,  $J = 259.0$  Hz), 139.7, 136.7, 135.1 (d,  $J = 7.2$  Hz), 133.8, 129.1, 128.8, 128.7, 128.0, 126.1, 122.7 (d,  $J = 19.0$  Hz), 121.9 (d,  $J = 3.9$  Hz), 116.5 (d,  $J = 18.3$  Hz), 72.5, 69.8, 44.5, -1.1.

**$^{19}\text{F}$  NMR** (377 MHz,  $\text{CDCl}_3$ )  $\delta$  -115.3. (s, 1F)

**IR** (film,  $\text{cm}^{-1}$ ): 3272, 2957, 1736, 1317, 1253, 1219, 1176, 1143, 844, 755, 701;

**HRMS** (ESI<sup>+</sup>)  $m/z$  calcd for  $\text{C}_{25}\text{H}_{26}\text{NNaO}_4\text{SSi}^+$  ( $[\text{M}] + \text{Na}^+$ ) = 506.1229, found 506.1227.

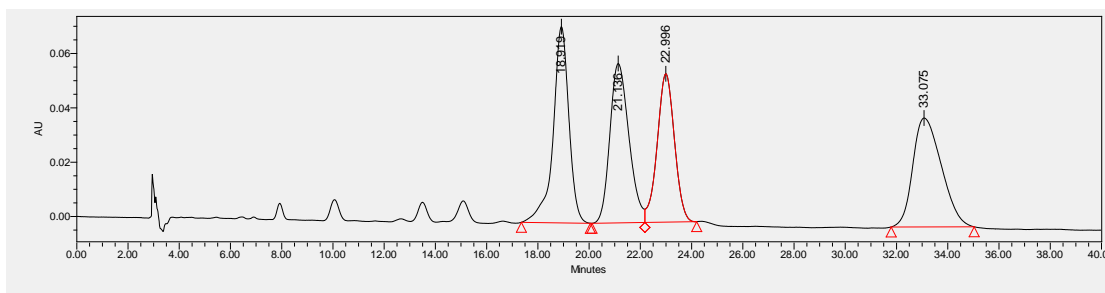

|   | Retention Time | Area    | % Area |
|---|----------------|---------|--------|
| 1 | 18.919         | 2578566 | 22.95  |
| 2 | 21.136         | 3022449 | 26.91  |
| 3 | 22.996         | 2531615 | 22.54  |
| 4 | 33.075         | 3100860 | 27.60  |

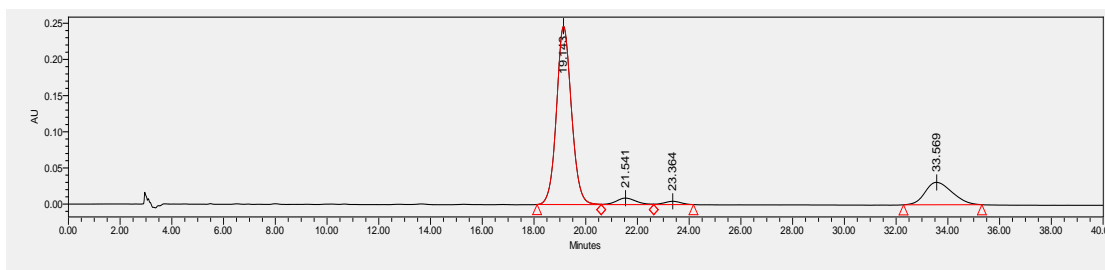

|   | Retention Time | Area    | % Area |
|---|----------------|---------|--------|
| 1 | 19.143         | 9906889 | 77.16  |
| 2 | 21.541         | 470026  | 3.66   |
| 3 | 23.364         | 203815  | 1.59   |
| 4 | 33.569         | 2258964 | 17.59  |

**benzyl 7-chloro-3-(phenyl(trimethylsilyl)methyl)-2,3-dihydrobenzo[d]isothiazole-3-carboxylate 1,1-dioxide(3h)**

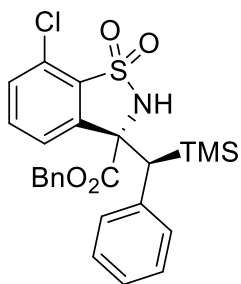

Colorless oil, 41.2 mg, 82% yield, 96% ee, 80:20 dr,  $[\alpha]_D^{20} = -34.7$  ( $c = 0.64$ ,  $\text{CH}_2\text{Cl}_2$ );

**SFC** Chiralcel IH-3,  $\text{CO}_2/\text{MeOH} = 96/4$ , 1.0 mL/min,  $\lambda = 220$  nm,  $t_1 = 18.31$  min,  $t_2 =$

20.63 min,  $t_3 = 23.42$  min,  $t_2 = 26.54$  min;

**$^1\text{H}$  NMR** (400 MHz,  $\text{CDCl}_3$ )  $\delta$  7.39 – 7.37 (m, 3H), 7.35 – 7.31 (m, 3H), 7.28 (t,  $J = 8.0$  Hz, 1H), 7.23 (dd,  $J_1 = 4.0$  Hz,  $J_2 = 8.0$  Hz, 2H), 7.10 – 7.06 (m, 1H), 7.04 (t,  $J = 8.0$  Hz,

2H), 6.95 (t,  $J = 8.0$  Hz, 1H), 5.92 (s, 1H), 5.22 (dd,  $J_1 = 12.0$  Hz,  $J_2 = 24.0$  Hz, 2H), 3.29 (s, 1H), 0.00 (s, 9H).

**$^{13}\text{C}$  NMR** (101 MHz,  $\text{CDCl}_3$ )  $\delta$  171.0, 139.0, 136.7, 133.8, 133.8, 132.4, 130.6, 129.1, 128.8, 128.7, 128.0, 126.1, 124.5, 71.4, 69.8, 44.2, -1.1.

**IR** (film,  $\text{cm}^{-1}$ ): 3273, 2957, 1735, 1317, 1250, 1218, 1170, 1143, 847, 754, 701;

**HRMS** ( $\text{ESI}^+$ )  $m/z$  calcd for  $\text{C}_{25}\text{H}_{26}^{35}\text{ClNNaO}_4\text{SSi}^+$  ( $[\text{M}]+\text{Na}^+$ ) = 522.0933, found 522.0930.

**HRMS** ( $\text{ESI}^+$ )  $m/z$  calcd for  $\text{C}_{25}\text{H}_{26}^{37}\text{ClNNaO}_4\text{SSi}^+$  ( $[\text{M}]+\text{Na}^+$ ) = 524.0904, found 524.0904.

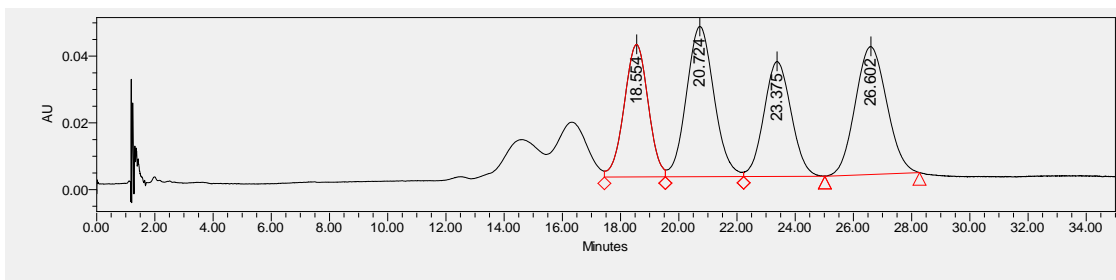

|   | Retention Time | Area    | % Area |
|---|----------------|---------|--------|
| 1 | 18.554         | 2261164 | 21.62  |
| 2 | 20.724         | 2964948 | 28.34  |
| 3 | 23.375         | 2233061 | 21.35  |
| 4 | 26.602         | 3001791 | 28.70  |

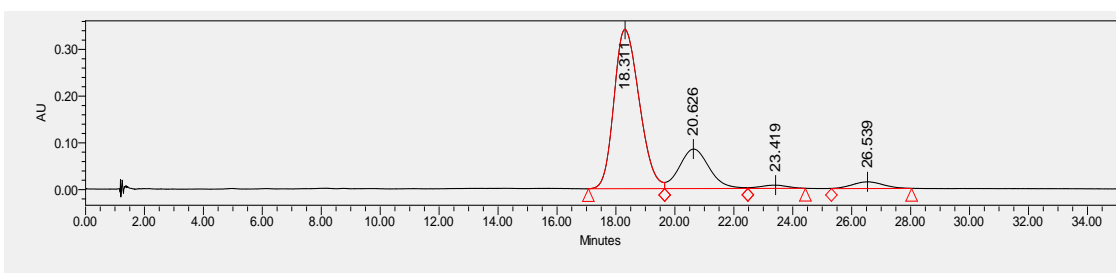

|   | Retention Time | Area     | % Area |
|---|----------------|----------|--------|
| 1 | 18.311         | 20320916 | 73.25  |
| 2 | 20.626         | 5932726  | 21.38  |
| 3 | 23.419         | 443677   | 1.60   |
| 4 | 26.539         | 1045813  | 3.77   |

**benzyl 3-(phenyl(trimethylsilyl)methyl)-7-(trifluoromethyl)-2,3-dihydrobenzo[d]isothiazole-3-carboxylate 1,1-dioxide(3i)**

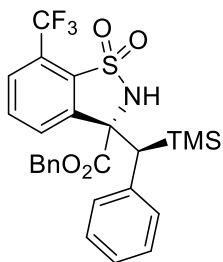

Colorless oil, 40.9 mg, 77% yield, 99% ee, 83:17 dr,  $[\alpha]_D^{20} = -43.3$  ( $c = 0.45$ ,  $\text{CH}_2\text{Cl}_2$ ); **HPLC**

Daicel chiralcel IC, *n*-hexane/*i*-PrOH 90/10, 1.0 mL/min,  $\lambda = 220$  nm,  $t_1 = 12.27$  min,  $t_2 =$

17.66 min,  $t_3 = 23.46$  min,  $t_4 = 40.59$  min;

**$^1\text{H}$  NMR** (400 MHz,  $\text{CDCl}_3$ )  $\delta$  7.63 (d,  $J = 8.0$  Hz, 1H), 7.54 (d,  $J = 8.0$  Hz, 1H), 7.45 (t,  $J =$

8.0 Hz, 1H), 7.38 – 7.36 (m, 3H), 7.33 – 7.31 (m, 2H), 7.23-7.21 (m, 1H), 7.08 (d,  $J = 8.0$  Hz,

1H), 7.02 (t,  $J = 8.0$  Hz, 2H), 6.93 (t,  $J = 8.0$  Hz, 1H), 5.96 (s, 1H), 5.23 (dd,  $J_1 = 12.0$  Hz,  $J_2 = 16.0$  Hz, 2H), 3.32

(s, 1H), 0.00 (s, 9H).

**$^{13}\text{C}$  NMR** (101 MHz,  $\text{CDCl}_3$ )  $\delta$  170.9, 138.9, 136.7, 133.7, 132.9, 130.2, 129.1, 128.8, 128.7, 128.1, 127.8 (d,  $J =$

4.8 Hz), 126.1, 71.7, 69.9, 44.6, -1.1.

**$^{19}\text{F}$  NMR** (377 MHz,  $\text{CDCl}_3$ )  $\delta$  -59.6. (s, 3F)

**IR** (film,  $\text{cm}^{-1}$ ): 3269, 2958, 1736, 1322, 1251, 1219, 1175, 1142, 842, 754, 703;

**HRMS** (ESI<sup>+</sup>)  $m/z$  calcd for  $\text{C}_{26}\text{H}_{26}\text{F}_3\text{NNaO}_4\text{SSi}^+$  ( $[\text{M}] + \text{Na}^+$ ) = 556.1197, found 556.1197.

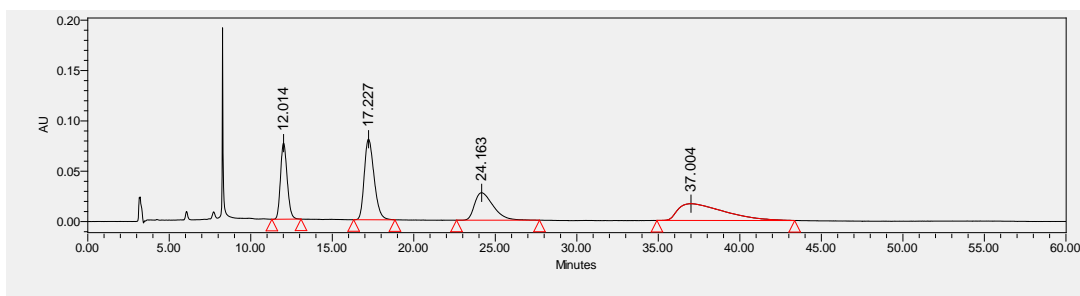

|   | Retention Time | Area    | % Area |
|---|----------------|---------|--------|
| 1 | 12.014         | 2157086 | 19.71  |
| 2 | 17.227         | 3344408 | 30.56  |
| 3 | 24.163         | 2169981 | 19.83  |
| 4 | 37.004         | 3270850 | 29.89  |

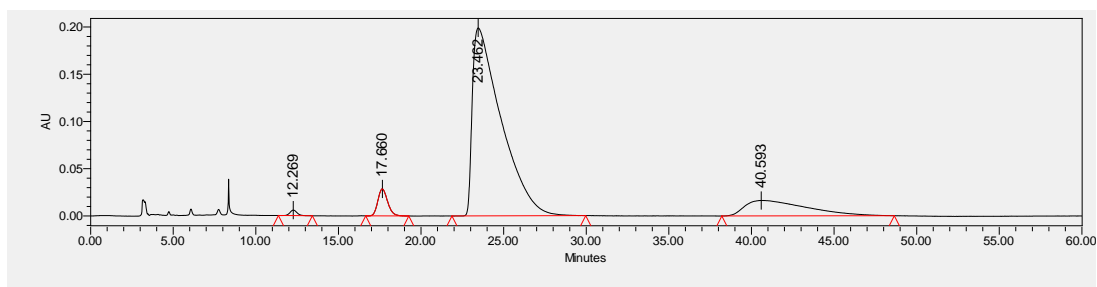

|   | Retention Time | Area     | % Area |
|---|----------------|----------|--------|
| 1 | 12.269         | 174298   | 0.59   |
| 2 | 17.660         | 1169531  | 3.94   |
| 3 | 23.462         | 24098945 | 81.16  |
| 4 | 40.593         | 4249749  | 14.31  |

**benzyl 3-(phenyl(trimethylsilyl)methyl)-2,3-dihydro[2,3-*d*]isothiazole-3-carboxylate 1,1-dioxide(3j)**

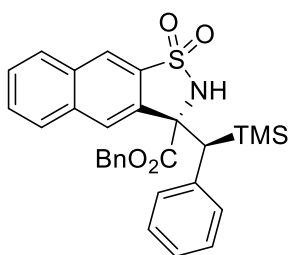

White amorphous solid, 15.4 mg, 30% yield, 82% ee, 80:20 dr, m.p. 79–83 °C.  $[\alpha]_D^{20} = -73.8$  ( $c = 0.20$ ,  $\text{CH}_2\text{Cl}_2$ ); **HPLC** Daicel chiralcel IG, *n*-hexane/*i*-PrOH 93/7, 1.0 mL/min,  $\lambda = 235$  nm,  $t_1 = 13.70$  min,  $t_2 = 16.12$  min,  $t_3 = 17.40$  min,  $t_4 = 18.85$  min;

**$^1\text{H}$  NMR** (400 MHz,  $\text{CDCl}_3$ )  $\delta$  8.05 (s, 1H), 7.86 (s, 1H), 7.80 (d,  $J = 8.0$  Hz, 1H), 7.69 (d,  $J = 8.0$  Hz, 1H), 7.52 – 7.45 (m, 2H), 7.31 – 7.26 (m, 5H), 7.19 – 7.16 (m, 1H), 7.05

(d,  $J = 8.0$  Hz, 1H), 6.91 (t,  $J = 8.0$  Hz, 2H), 6.79 (t,  $J = 8.0$  Hz, 1H), 5.83 (s, 1H), 5.19 (dd,  $J_1 = 12.0$  Hz,  $J_2 = 44.0$  Hz, 2H), 3.41 (s, 1H), 0.00 (s, 9H).

**$^{13}\text{C}$  NMR** (101 MHz,  $\text{CDCl}_3$ )  $\delta$  171.6, 137.2, 135.0, 134.0, 132.8, 132.3, 132.2, 129.1, 128.9, 128.8, 128.7, 128.6, 128.3, 127.9, 127.7, 126.0, 125.8, 121.7, 72.3, 69.5, 45.0, -0.9.

**IR** (film,  $\text{cm}^{-1}$ ): 3278, 2957, 1735, 1308, 1249, 1219, 1170, 1152, 844, 752, 701;

**HRMS** ( $\text{ESI}^+$ )  $m/z$  calcd for  $\text{C}_{29}\text{H}_{29}\text{NNaO}_4\text{SSi}^+$  ( $[\text{M}] + \text{Na}^+$ ) = 538.1479, found 538.1480.

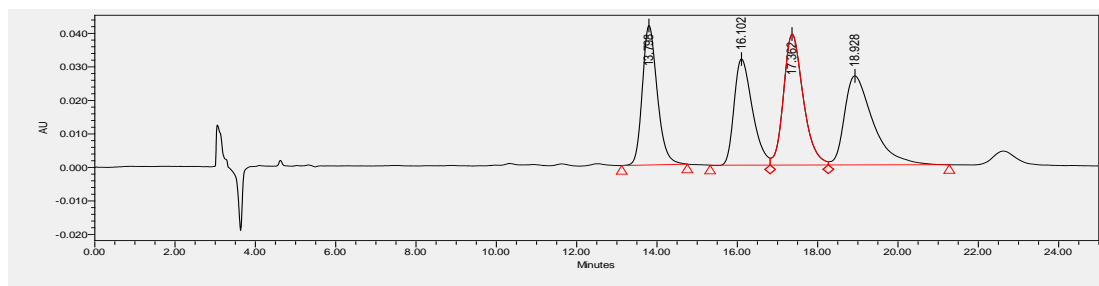

|   | Retention Time | Area    | % Area |
|---|----------------|---------|--------|
| 1 | 13.798         | 1009260 | 21.70  |
| 2 | 16.102         | 1002391 | 21.55  |
| 3 | 17.362         | 1328568 | 28.56  |
| 4 | 18.928         | 1311009 | 28.19  |

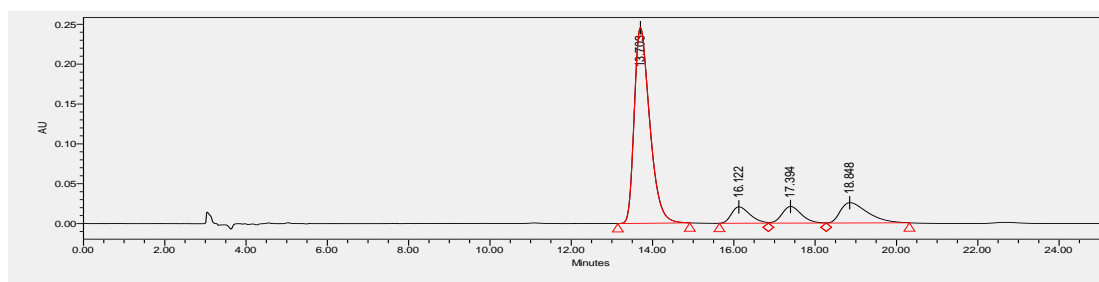

|   | Retention Time | Area    | % Area |
|---|----------------|---------|--------|
| 1 | 13.703         | 6485840 | 72.01  |
| 2 | 16.122         | 648127  | 7.20   |
| 3 | 17.394         | 687998  | 7.64   |
| 4 | 18.848         | 1184836 | 13.15  |

**benzyl 3-(m-tolyl(trimethylsilyl)methyl)-2,3-dihydrobenzo[*d*]isothiazole-3-carboxylate 1,1-dioxide (3k)**

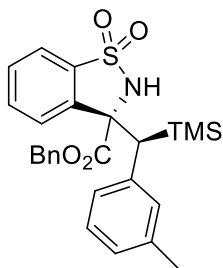

Colorless oil, 34.7 mg, 72% yield, 95% ee, 87:13 dr,  $[\alpha]_D^{20} = -53.5$  ( $c = 0.52$ ,  $\text{CH}_2\text{Cl}_2$ ); **SFC**

Chiralcel OX-3,  $\text{CO}_2/\text{MeOH} = 90/10$ , 1.5 mL/min,  $\lambda = 220$  nm,  $t_1 = 8.02$  min,  $t_2 = 8.67$  min,  $t_3 = 11.37$  min,  $t_4 = 12.86$  min;

**$^1\text{H NMR}$**  (400 MHz,  $\text{CDCl}_3$ )  $\delta$  7.53 (d,  $J = 4.0$  Hz, 1H), 7.43 (d,  $J = 8.0$  Hz, 1H), 7.38 – 7.36 (m, 3H), 7.34 – 7.28 (m, 4H), 7.25 (s, 2H), 6.87 (t,  $J = 8.0$  Hz, 1H), 6.72 (d,  $J = 8.0$  Hz, 1H),

5.82 (s, 1H), 5.21 (dd,  $J_1 = 12.0$ ,  $J_2 = 20.0$  Hz, 2H), 3.25 (s, 1H), 2.13 (s, 3H), 0.00 (s, 9H).

**$^{13}\text{C NMR}$**  (101 MHz,  $\text{CDCl}_3$ )  $\delta$  171.4, 136.8, 136.6, 134.4, 134.0, 132.8, 129.8, 128.9, 128.8, 128.6, 127.6, 126.6, 126.2, 120.9, 72.3, 69.5, 44.2, 21.2, -1.0.

**IR** (film,  $\text{cm}^{-1}$ ): 3280, 2955, 1734, 1307, 1249, 1219, 1170, 842, 754, 701;

**HRMS** (ESI<sup>+</sup>)  $m/z$  calcd for  $\text{C}_{26}\text{H}_{29}\text{NNaO}_4\text{SSi}^+$  ( $[\text{M}] + \text{Na}^+$ ) = 502.1479, found 502.1478.

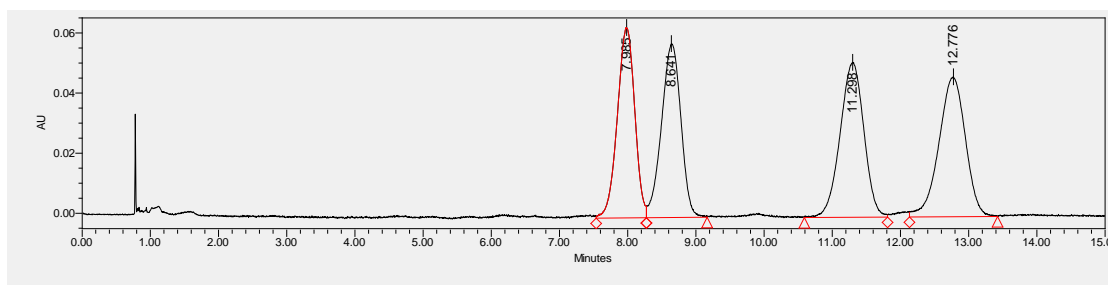

|   | Retention Time | Area    | % Area |
|---|----------------|---------|--------|
| 1 | 7.985          | 1120200 | 23.46  |
| 2 | 8.641          | 1145218 | 23.99  |
| 3 | 11.298         | 1251204 | 26.21  |
| 4 | 12.776         | 1257959 | 26.35  |

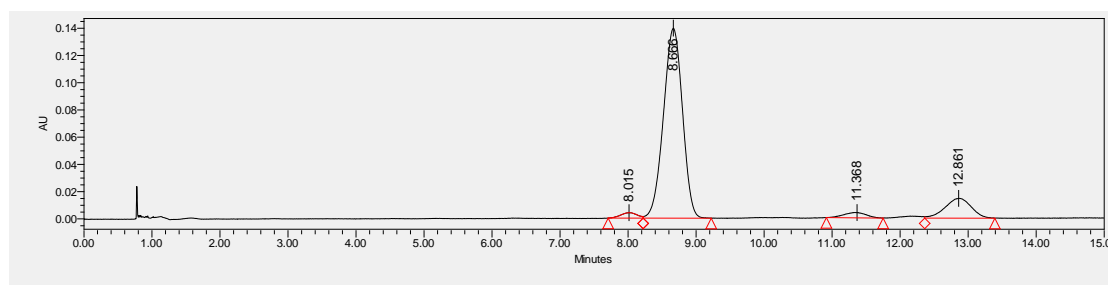

|   | Retention Time | Area    | % Area |
|---|----------------|---------|--------|
| 1 | 8.015          | 67402   | 2.07   |
| 2 | 8.666          | 2709466 | 83.16  |
| 3 | 11.368         | 90023   | 2.76   |
| 4 | 12.861         | 391063  | 12.00  |

**benzyl 3-(p-tolyl(trimethylsilyl)methyl)-2,3-dihydrobenzo[*d*]isothiazole-3-carboxylate 1,1-dioxide (31)**

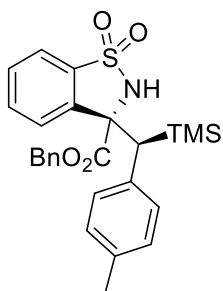

Colorless oil, 30.2 mg, 63% yield, 93% ee, 87:13 dr,  $[\alpha]_D^{20} = -50.0$  ( $c = 0.46$ ,  $\text{CH}_2\text{Cl}_2$ ); **SFC** Chiralcel ODH,  $\text{CO}_2/\text{MeOH} = 90/10$ , 1.0 mL/min,  $\lambda = 220$  nm,  $t_1 = 14.02$  min,  $t_2 = 15.47$  min,  $t_3 = 16.59$  min,  $t_4 = 18.19$  min;

**$^1\text{H}$  NMR** (600 MHz,  $\text{CDCl}_3$ )  $\delta$  7.55 (d,  $J = 6.0$  Hz, 1H), 7.46 (d,  $J = 6.0$  Hz, 1H), 7.40 – 7.38 (m, 4H), 7.33 – 7.32 (m, 4H), 7.05 (d,  $J = 6.0$  Hz, 1H), 6.82 (d,  $J = 6.0$  Hz, 2H), 5.81 (s, 1H), 5.22 (dd,  $J_1 = 12.0$ ,  $J_2 = 30.0$  Hz, 2H), 3.26 (s, 1H), 2.10 (s, 3H), 0.00 (s, 9H).

**$^{13}\text{C}$  NMR** (101 MHz,  $\text{CDCl}_3$ )  $\delta$  171.4, 136.7, 135.3, 134.3, 133.7, 132.9, 129.8, 128.9, 128.8, 128.6, 126.1, 121.0, 72.4, 69.5, 43.8, 20.8, -1.0.

**IR** (film,  $\text{cm}^{-1}$ ): 3282, 2955, 1735, 1308, 1250, 1220, 1169, 848, 754, 698;

**HRMS** (ESI<sup>+</sup>)  $m/z$  calcd for  $\text{C}_{26}\text{H}_{29}\text{NNaO}_4\text{SSi}^+$  ( $[\text{M}] + \text{Na}^+$ ) = 502.1479, found 502.1480.

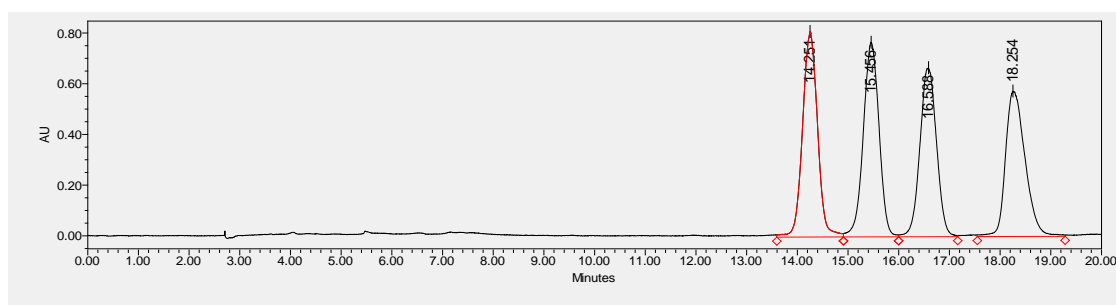

|   | Retention Time | Area     | % Area |
|---|----------------|----------|--------|
| 1 | 14.251         | 16641400 | 26.10  |
| 2 | 15.456         | 16544271 | 25.95  |
| 3 | 16.588         | 15152490 | 23.76  |
| 4 | 18.254         | 15423329 | 24.19  |

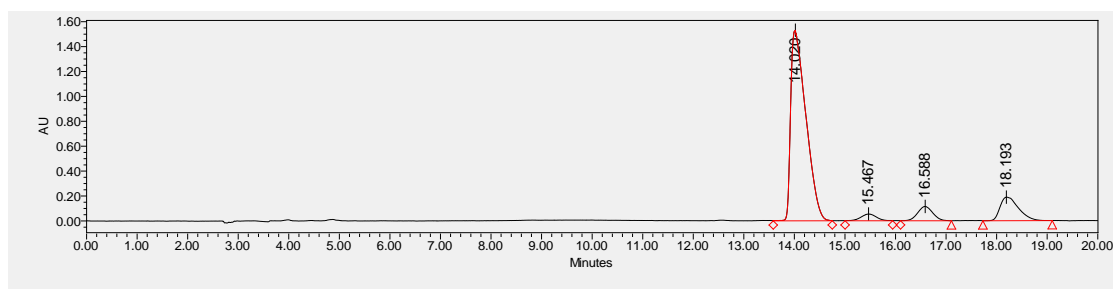

|   | Retention Time | Area     | % Area |
|---|----------------|----------|--------|
| 1 | 14.020         | 31793044 | 79.15  |
| 2 | 15.467         | 1167989  | 2.91   |
| 3 | 16.588         | 2402958  | 5.98   |
| 4 | 18.193         | 4803895  | 11.96  |



**benzyl 3-((4-methoxyphenyl)(trimethylsilyl)methyl)-2,3-dihydrobenzo[d]isothiazole-3-carboxylate 1,1-dioxide(3m)**

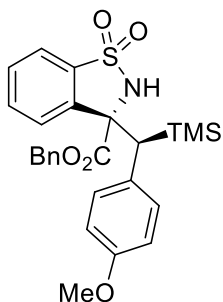

Colorless oil, 10.6 mg, 21% yield, 87% ee, 86:14 dr,  $[\alpha]_D^{20} = -40.4$  ( $c = 0.39$ ,  $\text{CH}_2\text{Cl}_2$ ); **SFC**

Chiralcel OX-3,  $\text{CO}_2/\text{MeOH} = 90/10$ , 1.5 mL/min,  $\lambda = 220$  nm,  $t_1 = 10.64$  min,  $t_2 = 14.58$  min,  $t_3 = 17.59$  min,  $t_4 = 24.38$  min;

**$^1\text{H}$  NMR** (400 MHz,  $\text{CDCl}_3$ )  $\delta$  7.55 (d,  $J = 8.0$  Hz, 1H), 7.45 – 7.44 (m, 1H), 7.41 – 7.36 (m, 4H), 7.36 – 7.30 (m, 4H), 7.11 (d,  $J = 8.0$  Hz, 1H), 6.56 (d,  $J = 8.0$  Hz, 2H), 5.80 (s, 1H), 5.22 (dd,  $J_1 = 12.0$ ,  $J_2 = 24.0$  Hz, 2H), 3.63 (s, 3H), 3.24 (s, 1H), 0.00 (s, 9H).

**$^{13}\text{C}$  NMR** (101 MHz,  $\text{CDCl}_3$ )  $\delta$  171.4, 157.6, 136.7, 134.4, 134.0, 132.9, 129.9, 128.9, 128.8, 128.6, 126.2, 121.0, 113.2, 72.5, 69.5, 54.9, 43.4, -1.0.

**IR** (film,  $\text{cm}^{-1}$ ): 3279, 2956, 1735, 1306, 1248, 1221, 1173, 848, 755, 698;

**HRMS** (ESI<sup>+</sup>)  $m/z$  calcd for  $\text{C}_{26}\text{H}_{29}\text{NNaO}_5\text{SSi}^+$  ( $[\text{M}] + \text{Na}^+$ ) = 518.1428, found 518.1430.

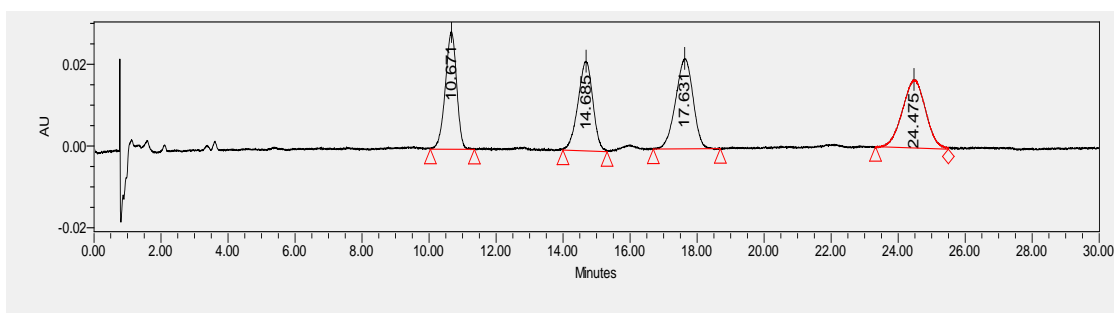

|   | Retention Time | Area   | % Area |
|---|----------------|--------|--------|
| 1 | 10.671         | 676406 | 22.94  |
| 2 | 14.685         | 677179 | 22.96  |
| 3 | 17.631         | 796829 | 27.02  |
| 4 | 24.475         | 798419 | 27.08  |

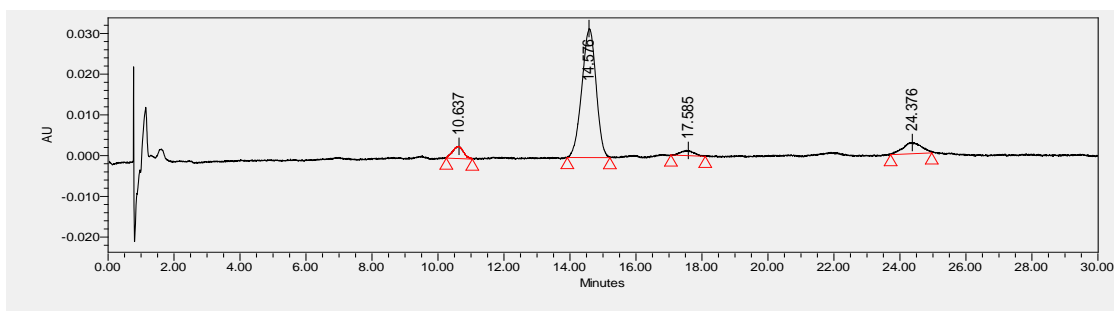

|   | Retention Time | Area   | % Area |
|---|----------------|--------|--------|
| 1 | 10.637         | 68254  | 5.88   |
| 2 | 14.576         | 949378 | 81.81  |
| 3 | 17.585         | 34601  | 2.98   |
| 4 | 24.376         | 108267 | 9.33   |

**benzyl 3-((4-fluorophenyl)(trimethylsilyl)methyl)-2,3-dihydrobenzo[d]isothiazole-3-carboxylate 1,1-dioxide(3n)**

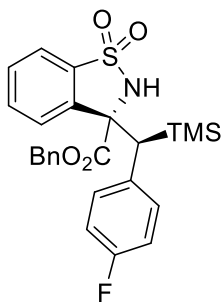

Colorless oil, 44.9 mg, 93% yield, 96% ee, 86:14 dr,  $[\alpha]_D^{20} = -56.7$  ( $c = 0.60$ ,  $\text{CH}_2\text{Cl}_2$ ); **SFC**

Chiralcel OX-3,  $\text{CO}_2/\text{MeOH} = 90/10$ , 1.5 mL/min,  $\lambda = 220$  nm,  $t_1 = 6.14$  min,  $t_2 = 7.29$  min,

$t_3 = 11.51$  min,  $t_4 = 13.34$  min;

**$^1\text{H}$  NMR** (400 MHz,  $\text{CDCl}_3$ )  $\delta$  7.60 – 7.55 (m, 1H), 7.52 (t,  $J = 8.0$  Hz, 2H), 7.40 – 7.35 (m, 4H), 7.33 – 7.30 (m, 3H), 7.14 – 7.08 (m, 1H), 6.87 – 6.82 (m, 1H), 6.77 – 6.72 (m, 1H), 5.85 (s, 1H), 5.23 (dd,  $J_1 = 12.0$ ,  $J_2 = 20.0$  Hz, 2H), 3.89 (s, 1H), 0.00 (s, 9H).

**$^{13}\text{C}$  NMR** (101 MHz,  $\text{CDCl}_3$ )  $\delta$  171.1, 161.1 (d,  $J = 244.5$  Hz), 139.7, 139.7, 136.3, 134.4, 133.8, 133.0, 132.8 (d,  $J = 3.3$  Hz), 130.1, 129.0, 128.8, 128.7, 126.0, 121.1, 115.2 (d,  $J = 21.3$  Hz), 72.0, 69.7, 44.3, -1.1.

**$^{19}\text{F}$  NMR** (565 MHz,  $\text{CDCl}_3$ )  $\delta$  -116.8. (s, 1F)

**IR** (film,  $\text{cm}^{-1}$ ): 3279, 2957, 1735, 1307, 1222, 1220, 1166, 849, 755, 698;

**HRMS** (ESI<sup>+</sup>)  $m/z$  calcd for  $\text{C}_{25}\text{H}_{26}\text{FNNaO}_4\text{SSi}^+$  ( $[\text{M}] + \text{Na}^+$ ) = 506.1229, found 506.1230.

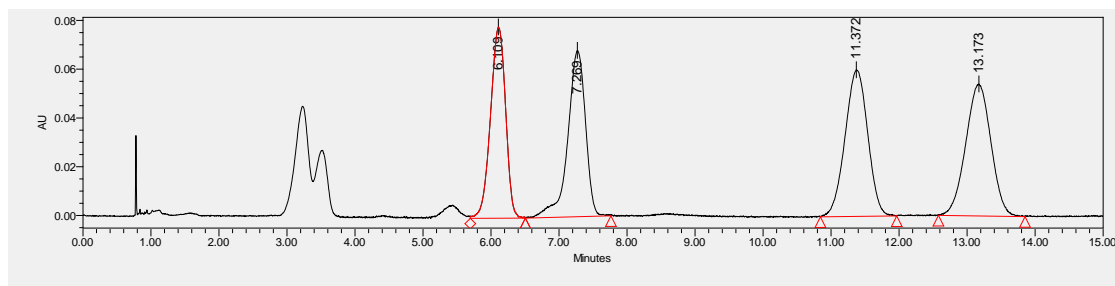

|   | Retention Time | Area    | % Area |
|---|----------------|---------|--------|
| 1 | 6.109          | 1207385 | 23.06  |
| 2 | 7.269          | 1238600 | 23.66  |
| 3 | 11.372         | 1393905 | 26.62  |
| 4 | 13.173         | 1395782 | 26.66  |

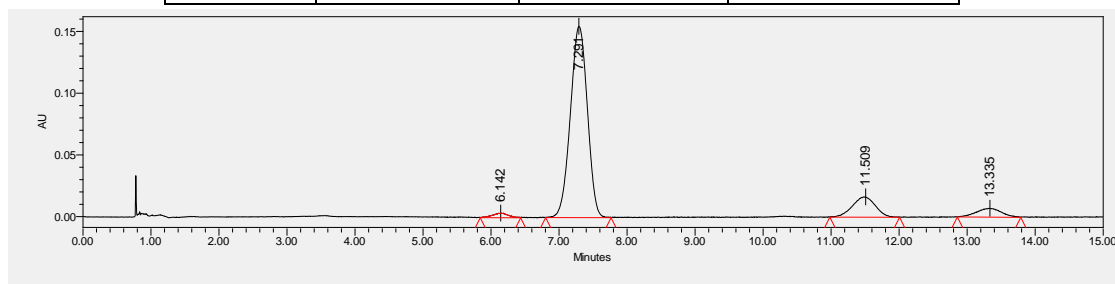

|   | Retention Time | Area    | % Area |
|---|----------------|---------|--------|
| 1 | 6.142          | 59619   | 1.80   |
| 2 | 7.291          | 2687164 | 80.94  |
| 3 | 11.509         | 387532  | 11.67  |
| 4 | 13.335         | 185580  | 5.59   |

**benzyl 3-((4-chlorophenyl)(trimethylsilyl)methyl)-2,3-dihydrobenzo[d]isothiazole-3-carboxylate 1,1-dioxide(3o)**

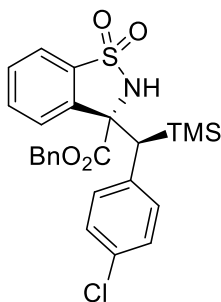

Colorless oil, 46.7 mg, 93% yield, 96% ee, 86:14 dr,  $[\alpha]_D^{20} = -55.6$  ( $c = 0.61$ ,  $\text{CH}_2\text{Cl}_2$ ); **SFC**

Chiralcel OX-3,  $\text{CO}_2/\text{MeOH} = 90/10$ , 1.5 mL/min,  $\lambda = 235$  nm,  $t_1 = 9.01$  min,  $t_2 = 11.17$  min,  $t_3 = 17.05$  min,  $t_4 = 20.64$  min;

**$^1\text{H}$  NMR** (400 MHz,  $\text{CDCl}_3$ )  $\delta$  7.56 (d,  $J = 8.0$  Hz, 1H), 7.43 – 7.40 (m, 3H), 7.38 – 7.35 (m, 3H), 7.33 – 7.30 (m, 3H), 7.21 – 7.11 (m, 1H), 6.99 (d,  $J = 8.0$  Hz, 2H), 5.83 (s, 1H), 5.22 (dd,  $J_1 = 12.0$ ,  $J_2 = 24.0$  Hz, 2H), 3.30 (s, 1H), 0.00 (s, 9H).

**$^{13}\text{C}$  NMR** (101 MHz,  $\text{CDCl}_3$ )  $\delta$  171.1, 136.3, 135.7, 134.3, 133.8, 133.1, 131.8, 130.1, 129.0, 128.8, 128.7, 128.1, 125.9, 121.2, 72.0, 69.7, 43.9, -1.1.

**IR** (film,  $\text{cm}^{-1}$ ): 3278, 2956, 1736, 1308, 1251, 1220, 1169, 848, 755, 698;

**HRMS** ( $\text{ESI}^+$ )  $m/z$  calcd for  $\text{C}_{25}\text{H}_{26}^{35}\text{ClNNaO}_4\text{SSi}^+$  ( $[\text{M}]+\text{Na}^+$ ) = 522.0933, found 522.0931.

**HRMS** ( $\text{ESI}^+$ )  $m/z$  calcd for  $\text{C}_{25}\text{H}_{26}^{37}\text{ClNNaO}_4\text{SSi}^+$  ( $[\text{M}]+\text{Na}^+$ ) = 524.0904, found 524.0900

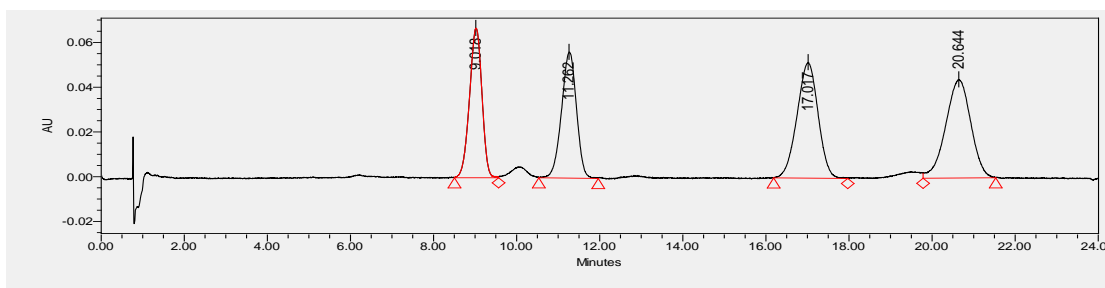

|   | Retention Time | Area    | % Area |
|---|----------------|---------|--------|
| 1 | 9.018          | 1386664 | 21.47  |
| 2 | 11.262         | 1408641 | 21.81  |
| 3 | 17.017         | 1817129 | 28.14  |
| 4 | 20.644         | 1845628 | 28.58  |

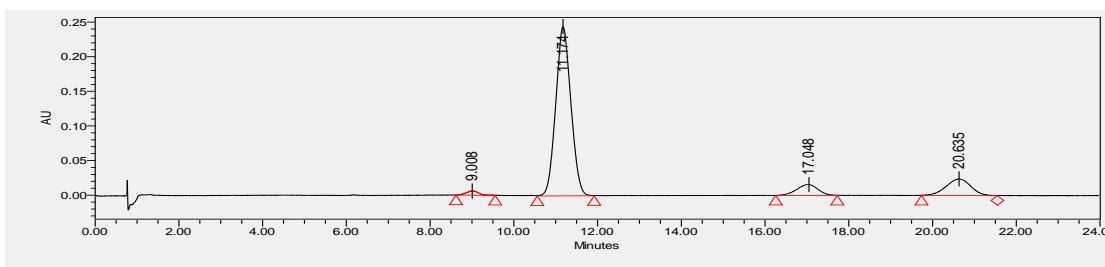

|   | Retention Time | Area    | % Area |
|---|----------------|---------|--------|
| 1 | 9.008          | 131729  | 1.69   |
| 2 | 11.174         | 6132089 | 78.55  |
| 3 | 17.048         | 556076  | 7.12   |
| 4 | 20.635         | 986582  | 12.64  |

**benzyl 3-((4-bromophenyl)(trimethylsilyl)methyl)-2,3-dihydrobenzo[d]isothiazole-3-carboxylate 1,1-dioxide(3p)**

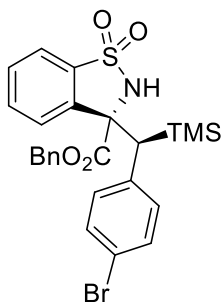

Colorless oil, 47.1 mg, 86% yield, 96% ee, 84:16 dr,  $[\alpha]_D^{20} = -51.1$  ( $c = 0.70$ ,  $\text{CH}_2\text{Cl}_2$ ); SFC

Chiralcel AD-3,  $\text{CO}_2/\text{MeOH} = 90/10$ , 1.5 mL/min,  $\lambda = 240$  nm,  $t_1 = 4.53$  min,  $t_2 = 5.25$  min,

$t_3 = 6.03$  min,  $t_4 = 8.54$  min;

$^1\text{H NMR}$  (600 MHz,  $\text{CDCl}_3$ )  $\delta$  7.56 (d,  $J = 6.0$  Hz, 1H), 7.43 – 7.40 (m, 2H), 7.38 – 7.35 (m, 4H), 7.32 (s, 3H), 7.14 (d,  $J = 6.0$  Hz, 2H), 7.08 (d,  $J = 6.0$  Hz, 1H), 5.85 (s, 1H), 5.23 (dd,  $J_1 = 12.0$ ,  $J_2 = 36.0$  Hz, 2H) 3.29 (s, 1H), 0.00 (s, 9H).

$^{13}\text{C NMR}$  (101 MHz,  $\text{CDCl}_3$ )  $\delta$  172.2, 137.4, 137.4, 135.5, 135.0, 134.3, 132.1, 131.3, 130.2, 123.0, 129.8, 127.1, 122.3, 121.1, 73.1, 70.8, 45.0, 0.0.

IR (film,  $\text{cm}^{-1}$ ): 3276, 2956, 1735, 1307, 1250, 1218, 1169, 847, 755, 698;

HRMS (ESI<sup>+</sup>)  $m/z$  calcd for  $\text{C}_{25}\text{H}_{26}^{79}\text{BrNNaO}_4\text{SSi}^+$  ( $[\text{M}]+\text{Na}^+$ ) = 566.0428, found 566.0428.

HRMS (ESI<sup>+</sup>)  $m/z$  calcd for  $\text{C}_{25}\text{H}_{26}^{81}\text{BrNNaO}_4\text{SSi}^+$  ( $[\text{M}]+\text{Na}^+$ ) = 568.0407, found 568.0399.

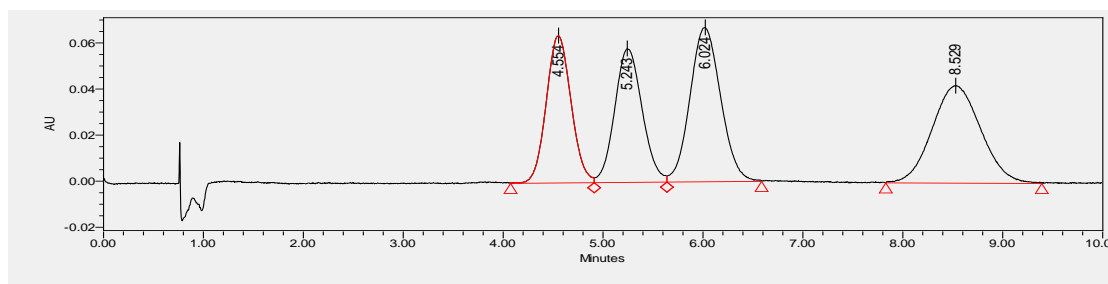

|   | Retention Time | Area    | % Area |
|---|----------------|---------|--------|
| 1 | 4.554          | 1101684 | 21.70  |
| 2 | 5.243          | 1107601 | 21.82  |
| 3 | 6.024          | 1432255 | 28.21  |
| 4 | 8.529          | 1434678 | 28.26  |

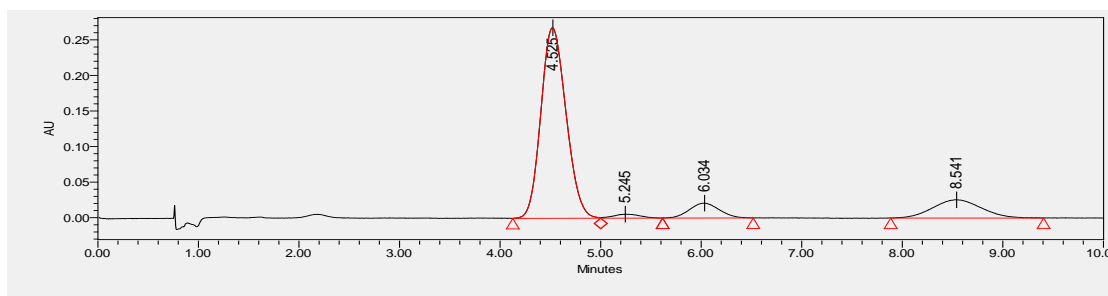

|   | Retention Time | Area    | % Area |
|---|----------------|---------|--------|
| 1 | 4.525          | 4655471 | 76.68  |
| 2 | 5.245          | 104778  | 1.73   |
| 3 | 6.034          | 437560  | 7.21   |
| 4 | 8.541          | 873695  | 14.39  |

**benzyl 3-((2-fluorophenyl)(trimethylsilyl)methyl)-2,3-dihydrobenzo[d]isothiazole-3-carboxylate 1,1-dioxide(3q)**

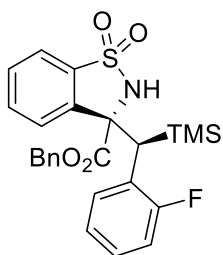

Colorless oil, 22.1 mg, 46% yield, 86% ee, 83:17 dr,  $[\alpha]_D^{20} = -42.4$  ( $c = 0.29$ ,  $\text{CH}_2\text{Cl}_2$ ); **SFC**

Chiralcel OX-3,  $\text{CO}_2/\text{MeOH} = 90/10$ , 1.5 mL/min,  $\lambda = 220$  nm,  $t_1 = 5.81$  min,  $t_2 = 7.10$  min,

$t_3 = 9.08$  min,  $t_4 = 11.21$  min;

**$^1\text{H NMR}$**  (400 MHz,  $\text{CDCl}_3$ )  $\delta$  7.60 – 7.55 (m, 1H), 7.52 (t,  $J = 8.0$  Hz, 2H), 7.41 – 7.34 (m, 4H), 7.33 – 7.30 (m, 3H), 7.14 – 7.08 (m, 1H), 6.86 – 6.82 (m, 1H), 6.77 – 6.72 (m, 1H), 5.85

(s, 1H), 5.23 (dd,  $J_1 = 12.0$ ,  $J_2 = 20.0$  Hz, 2H), 3.89 (s, 1H), 0.00 (s, 9H).

**$^{13}\text{C NMR}$**  (101 MHz,  $\text{CDCl}_3$ )  $\delta$  171.1, 139.7 (d,  $J = 7.4$  Hz), 135.3 (d,  $J = 191.2$  Hz), 133.8, 133.1, 130.1, 129.0, 128.8, 128.7, 125.9, 121.1, 112.9 (d,  $J = 20.6$  Hz), 72.0, 69.7, 44.3, -1.1.

**$^{19}\text{F NMR}$**  (377 MHz,  $\text{CDCl}_3$ )  $\delta$  -117.3. (s, 1F)

**IR** (film,  $\text{cm}^{-1}$ ): 3281, 2958, 1736, 1308, 1262, 1222, 1166, 844, 734, 700;

**HRMS** (ESI<sup>+</sup>)  $m/z$  calcd for  $\text{C}_{25}\text{H}_{26}\text{FNNaO}_4\text{SSi}^+$  ( $[\text{M}] + \text{Na}^+$ ) = 506.1229, found 506.1229.

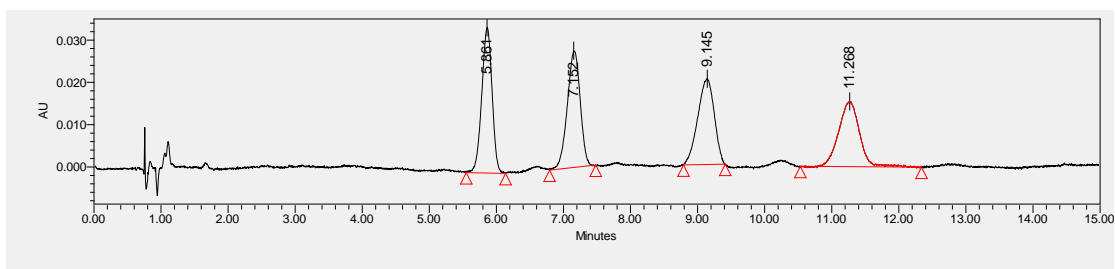

|   | Retention Time | Area   | % Area |
|---|----------------|--------|--------|
| 1 | 5.861          | 369595 | 26.03  |
| 2 | 7.152          | 369302 | 26.01  |
| 3 | 9.145          | 346008 | 24.37  |
| 4 | 11.268         | 334968 | 23.59  |

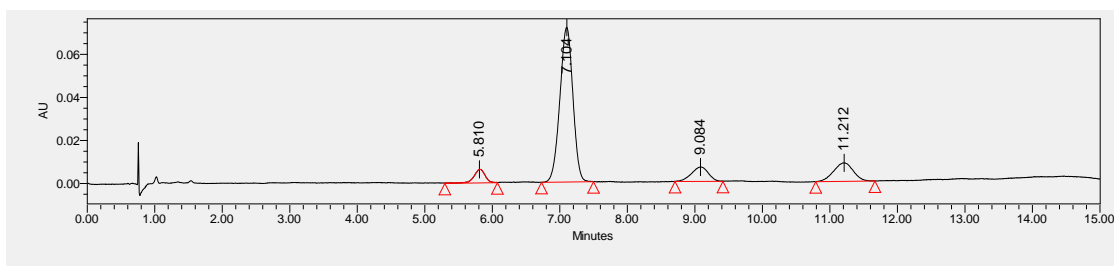

|   | Retention Time | Area   | % Area |
|---|----------------|--------|--------|
| 1 | 5.810          | 73028  | 5.51   |
| 2 | 7.104          | 963238 | 72.63  |
| 3 | 9.084          | 115520 | 8.71   |
| 4 | 11.212         | 174458 | 13.15  |

**benzyl 3-((3-fluorophenyl)(trimethylsilyl)methyl)-2,3-dihydrobenzo[d]isothiazole-3-carboxylate 1,1-dioxide(3r)**

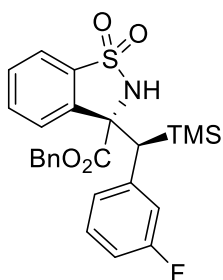

Colorless oil, 33.1 mg, 68% yield, 89% ee, 82:18 dr,  $[\alpha]_D^{20} = -23.4$  ( $c = 0.53$ ,  $\text{CH}_2\text{Cl}_2$ ); **SFC**

Chiralcel AD-3,  $\text{CO}_2/\text{MeOH} = 92/8$ , 1.5 mL/min,  $\lambda = 220$  nm,  $t_1 = 3.50$  min,  $t_2 = 4.12$  min,  $t_3$

$= 4.87$  min,  $t_4 = 6.85$  min;

**$^1\text{H}$  NMR** (400 MHz,  $\text{CDCl}_3$ )  $\delta$  7.55 (d,  $J = 8.0$  Hz, 1H), 7.43-7.38 (m, 2H), 7.37 – 7.35 (m, 3H), 7.33 – 7.31 (m, 3H), 7.11 – 7.09 (m, 1H), 6.99 – 6.86 (m, 2H), 6.64 – 6.60 (m, 1H), 5.83

(s, 1H), 5.21 (dd,  $J_1 = 12.0$ ,  $J_2 = 24.0$  Hz, 2H), 3.29 (s, 1H), 0.00 (s, 9H);

**$^{13}\text{C}$  NMR** (101 MHz,  $\text{CDCl}_3$ )  $\delta$  171.0, 137.9 (d,  $J = 336.8$  Hz), 133.8, 133.1, 130.1, 129.1, 128.8, 128.7, 125.9, 121.2, 72.0, 69.7, 44.3, -1.10;

**$^{19}\text{F}$  NMR** (565 MHz,  $\text{CDCl}_3$ )  $\delta$  -112.2. (s, 1F)

**IR** (film,  $\text{cm}^{-1}$ ): 3278, 2957, 1735, 1308, 1250, 1220, 1170, 823, 755, 701;

**HRMS** ( $\text{ESI}^+$ )  $m/z$  calcd for  $\text{C}_{25}\text{H}_{26}\text{FNNaO}_4\text{SSi}^+$  ( $[\text{M}] + \text{Na}^+$ ) = 506.1229, found 506.1229.

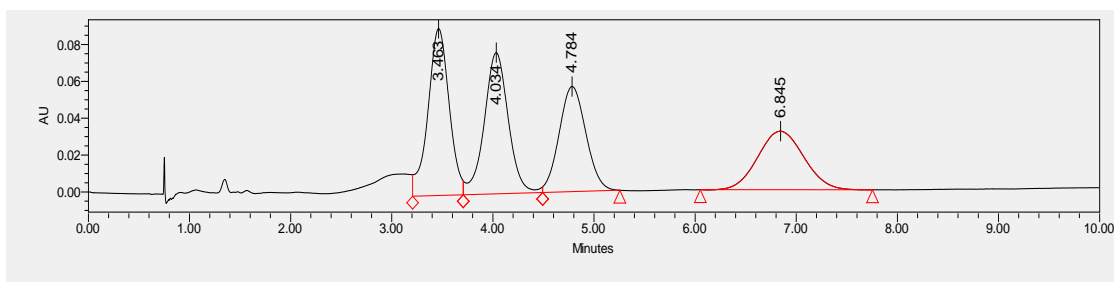

|   | Retention Time | Area    | % Area |
|---|----------------|---------|--------|
| 1 | 3.463          | 1311938 | 28.33  |
| 2 | 4.034          | 1267104 | 27.36  |
| 3 | 4.784          | 1047830 | 22.63  |
| 4 | 6.845          | 1004107 | 21.68  |

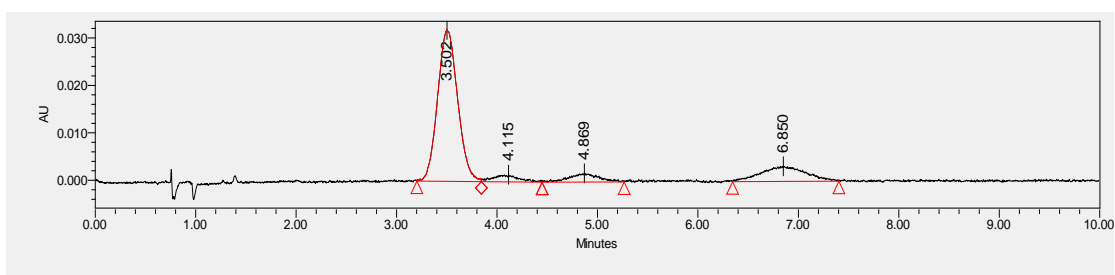

|   | Retention Time | Area   | % Area |
|---|----------------|--------|--------|
| 1 | 3.502          | 441524 | 73.31  |
| 2 | 4.115          | 25736  | 4.27   |
| 3 | 4.869          | 37461  | 6.22   |
| 4 | 6.850          | 97511  | 16.19  |

**benzyl 3-((3-bromophenyl)(trimethylsilyl)methyl)-2,3-dihydrobenzo[d]isothiazole-3-carboxylate 1,1-dioxide(3s)**

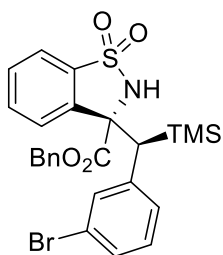

Colorless oil, 27.1 mg, 50% yield, 83% ee/32%, 78:22 dr,  $[\alpha]_D^{20} = -35.9$  ( $c = 0.42$ ,  $\text{CH}_2\text{Cl}_2$ );

**HPLC** Daicel chiralcel IF, *n*-hexane/*i*-PrOH 93/7, 1.0 mL/min,  $\lambda = 220$  nm,  $t_1 = 30.79$  min,

$t_2 = 35.09$  min,  $t_3 = 37.15$  min,  $t_4 = 43.12$  min;

**$^1\text{H}$  NMR** (400 MHz,  $\text{CDCl}_3$ )  $\delta$  7.55 (d,  $J = 8.0$  Hz, 1H), 7.42 – 7.41 (m, 2H), 7.38 – 7.34 (m, 5H), 7.32 – 7.29 (m, 3H), 7.06 (d,  $J = 8.0$  Hz, 1H), 6.88 (t,  $J = 8.0$  Hz, 1H), 5.83 (s, 1H), 5.21

(dd,  $J_1 = 12.0$ ,  $J_2 = 24.0$  Hz, 2H), 3.24 (s, 1H), 0.00 (s, 9H).

**$^{13}\text{C}$  NMR** (101 MHz,  $\text{CDCl}_3$ )  $\delta$  171.0, 139.6, 136.2, 133.8, 133.1, 130.1, 129.1, 128.8, 128.7, 125.9, 121.2, 72.0, 69.7, 44.3, -1.1.

**IR** (film,  $\text{cm}^{-1}$ ): 3276, 2956, 1735, 1308, 1251, 1221, 1169, 845, 755, 696;

**HRMS** (ESI<sup>+</sup>)  $m/z$  calcd for  $\text{C}_{25}\text{H}_{26}^{79}\text{BrNNaO}_4\text{SSi}^+$  ( $[\text{M}]+\text{Na}^+$ ) = 566.0428, found 566.0428.

**HRMS** (ESI<sup>+</sup>)  $m/z$  calcd for  $\text{C}_{25}\text{H}_{26}^{81}\text{BrNNaO}_4\text{SSi}^+$  ( $[\text{M}]+\text{Na}^+$ ) = 568.0407, found 568.0399.

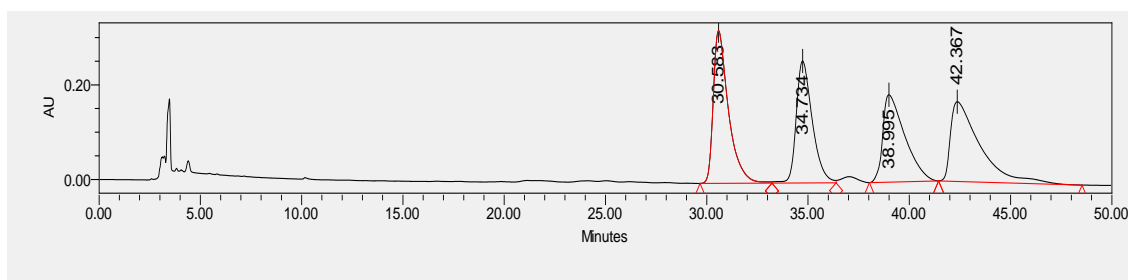

|   | Retention Time | Area     | % Area |
|---|----------------|----------|--------|
| 1 | 30.583         | 16802551 | 27.13  |
| 2 | 34.734         | 14199210 | 22.93  |
| 3 | 38.995         | 13954848 | 22.53  |
| 4 | 42.367         | 16975034 | 27.41  |

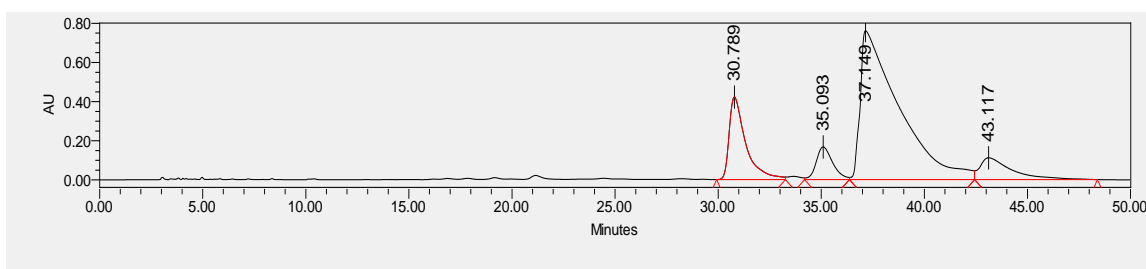

|   | Retention Time | Area     | % Area |
|---|----------------|----------|--------|
| 1 | 30.789         | 23631657 | 16.37  |
| 2 | 35.093         | 9315881  | 6.45   |
| 3 | 37.149         | 99340194 | 68.80  |
| 4 | 43.117         | 12093581 | 8.38   |

**benzyl 3-(naphthalen-2-yl(trimethylsilyl)methyl)-2,3-dihydrobenzo[d]isothiazole-3-carboxylate 1,1-dioxide(3t)**

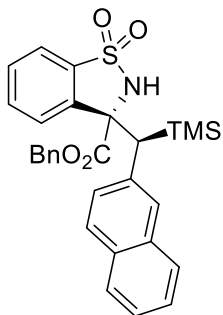

White amorphous solid, 26.3mg, 51% yield, 94% ee, 83:17 dr, m.p. 76–78 °C.  $[\alpha]_D^{20} = -44.6$

( $c = 0.66$ ,  $\text{CH}_2\text{Cl}_2$ ); **HPLC** Daicel chiralcel ADH, *n*-hexane/*i*-PrOH 95/5, 1.0 mL/min,  $\lambda = 220$  nm,  $t_1 = 25.49$  min,  $t_2 = 37.13$  min,  $t_3 = 43.81$  min,  $t_4 = 48.08$  min;

**$^1\text{H}$  NMR** (400 MHz,  $\text{CDCl}_3$ )  $\delta$  7.69 – 7.61 (m, 2H), 7.58 (d,  $J = 6.0$  Hz, 1H), 7.48 – 7.44 (m, 4H), 7.37 – 7.36 (m, 3H), 7.33 – 7.31 (m, 2H), 7.30 – 7.25 (m, 3H), 7.20 – 7.17 (m, 1H), 5.88 (s, 1H), 5.22 (dd,  $J_1 = 8.0$ ,  $J_2 = 16.0$  Hz, 2H), 3.48 (s, 1H), 0.00 (s, 9H).

**$^{13}\text{C}$  NMR** (101 MHz,  $\text{CDCl}_3$ )  $\delta$  171.4, 136.6, 134.9, 134.4, 134.0, 132.9, 131.7, 129.9, 129.0, 128.8, 128.6, 125.6, 125.1, 121.0, 72.4, 69.6, 44.4, -1.0.

**IR** (film,  $\text{cm}^{-1}$ ): 3279, 2956, 1735, 1308, 1250, 1221, 1169, 843, 752, 698;

**HRMS** (ESI<sup>+</sup>)  $m/z$  calcd for  $\text{C}_{29}\text{H}_{29}\text{NNaO}_4\text{SSi}^+$  ( $[\text{M}] + \text{Na}^+$ ) = 538.1479, found 538.1479.

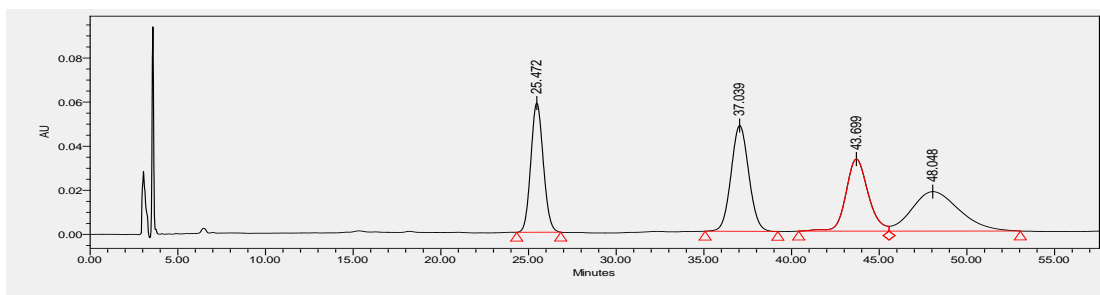

|   | Retention Time | Area    | % Area |
|---|----------------|---------|--------|
| 1 | 25.472         | 2893704 | 23.16  |
| 2 | 37.039         | 3369963 | 26.97  |
| 3 | 43.699         | 2870355 | 22.98  |
| 4 | 48.048         | 3358901 | 26.89  |

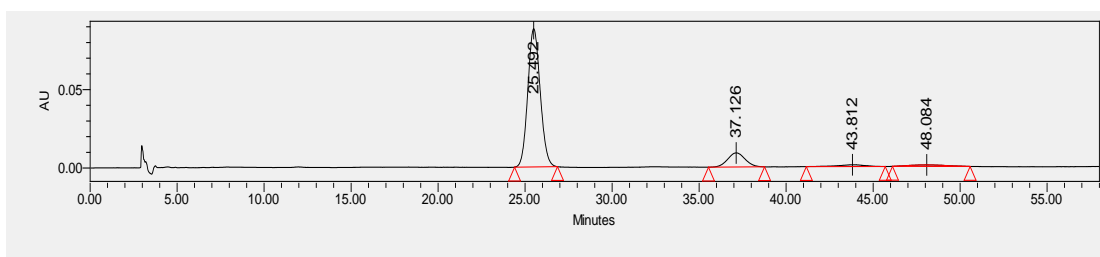

|   | Retention Time | Area    | % Area |
|---|----------------|---------|--------|
| 1 | 25.492         | 4361901 | 82.95  |
| 2 | 37.126         | 627637  | 11.94  |
| 3 | 43.812         | 125832  | 2.39   |
| 4 | 48.084         | 142976  | 2.72   |



benzyl 3-(naphthalen-2-ylmethyl)-2,3-dihydrobenzo[d]isothiazole-3-carboxylate 1,1-dioxide(3t')

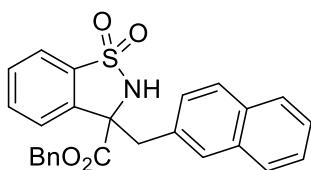

Colorless oil, 18.3 mg, 41% yield, 47% ee,  $[\alpha]_D^{20} = -9.2$  ( $c = 0.34$ ,  $\text{CH}_2\text{Cl}_2$ ); SFC Chiralcel IB-3,  $\text{CO}_2/\text{MeOH} = 90/10$ , 1.5 mL/min,  $\lambda = 220$  nm,  $t_1 = 10.85$  min,  $t_2 = 14.19$  min;

$^1\text{H NMR}$  (600 MHz,  $\text{CDCl}_3$ )  $\delta$  7.90 (d,  $J = 6.0$  Hz, 1H), 7.81 (d,  $J = 12.0$  Hz, 2H), 7.77 – 7.68 (m, 4H), 7.64 – 7.61 (m, 1H), 7.49 – 7.46 (m, 2H), 7.39 – 7.36 (m, 2H), 7.32 (t,  $J = 6.0$  Hz, 2H), 7.23 (d,  $J = 6.0$  Hz, 2H), 5.62 (s, 1H), 5.15 (q,  $J = 12.0$  Hz, 2H), 3.72 (d,  $J = 12.0$  Hz, 1H), 3.34 (d,  $J = 12.0$  Hz, 1H).

$^{13}\text{C NMR}$  (151 MHz,  $\text{CDCl}_3$ )  $\delta$  168.9, 138.0, 135.5, 133.9, 133.5, 133.2, 132.7, 131.8, 130.7, 129.4, 129.0, 128.8, 128.8, 128.28, 128.0, 127.8, 127.6, 126.1, 126.0, 125.1, 121.6, 69.8, 69.2, 46.3.

IR (film,  $\text{cm}^{-1}$ ): 3288, 2928, 1738, 1304, 1168, 1222, 1186, 898, 754, 698;

HRMS (ESI<sup>+</sup>)  $m/z$  calcd for  $\text{C}_{26}\text{H}_{21}\text{NNaO}_4\text{S}^+$  ( $[\text{M}] + \text{Na}^+$ ) = 466.1084, found 466.1077.

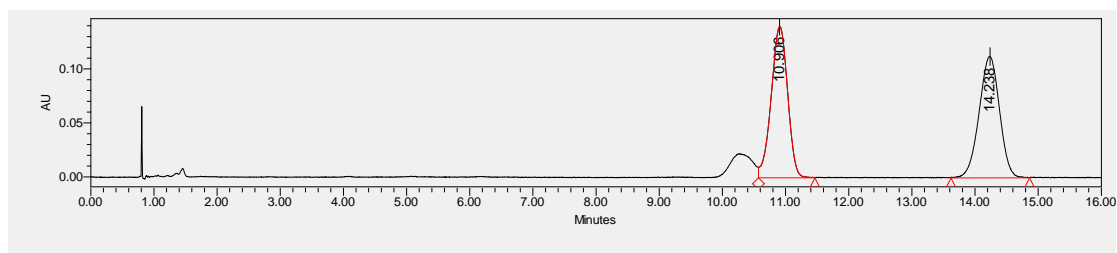

|   | Retention Time | Area    | % Area |
|---|----------------|---------|--------|
| 1 | 10.906         | 2534158 | 50.04  |
| 2 | 14.238         | 2530219 | 49.96  |

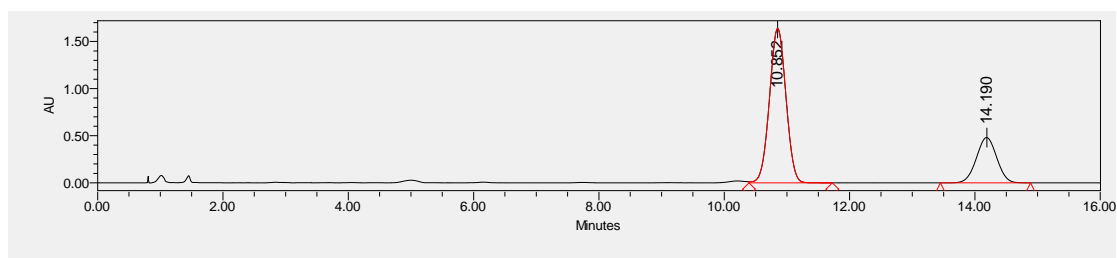

|   | Retention Time | Area     | % Area |
|---|----------------|----------|--------|
| 1 | 10.852         | 29962516 | 73.37  |
| 2 | 14.190         | 10873810 | 26.63  |

**benzyl 3-(phenyl(triethylsilyl)methyl)-2,3-dihydrobenzo[d]isothiazole-3-carboxylate 1,1-dioxide(3u)**

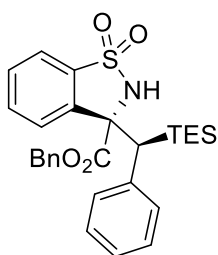

Colorless oil, 29.5 mg, 58% yield, 94% ee, 92:8 dr,  $[\alpha]_D^{20} = -31.5$  ( $c = 0.47$ ,  $\text{CH}_2\text{Cl}_2$ ); **SFC**

Chiralcel ID-3,  $\text{CO}_2/\text{MeOH} = 95/5$ , 1.5 mL/min,  $\lambda = 211$  nm,  $t_1 = 17.78$  min,  $t_2 = 18.87$  min,

$t_3 = 26.33$  min,  $t_4 = 32.58$  min;

**$^1\text{H NMR}$**  (600 MHz,  $\text{CDCl}_3$ )  $\delta$  7.53 (d,  $J = 6.0$  Hz, 1H), 7.42 (d,  $J = 12.0$  Hz, 1H), 7.39 – 7.36 (m, 4H), 7.35 – 7.29 (m, 4H), 7.23 – 7.19 (m, 1H), 7.00 (s, 2H), 6.93 – 6.90 (m, 1H), 5.79 (s,

1H), 5.23 (dd,  $J_1 = 12.0$ ,  $J_2 = 42.0$  Hz, 2H), 3.45 (s, 1H), 0.86 (t,  $J = 12.0$  Hz, 9H), 0.56 – 0.49 (m, 6H).

**$^{13}\text{C NMR}$**  (150 MHz,  $\text{CDCl}_3$ )  $\delta$  171.4, 137.2, 136.7, 134.4, 133.9, 132.8, 129.8, 129.0, 128.8, 128.7, 126.3, 125.8, 120.9, 72.3, 69.6, 41.6, 7.5, 3.3.

**IR** (film,  $\text{cm}^{-1}$ ): 3283, 3030, 2954, 2877, 1735, 1309, 1219, 1170, 809, 754, 705;

**HRMS** (ESI<sup>+</sup>)  $m/z$  calcd for  $\text{C}_{28}\text{H}_{33}\text{NNaO}_4\text{SSi}^+$  ( $[\text{M}] + \text{Na}^+$ ) = 530.1792, found 530.1792.

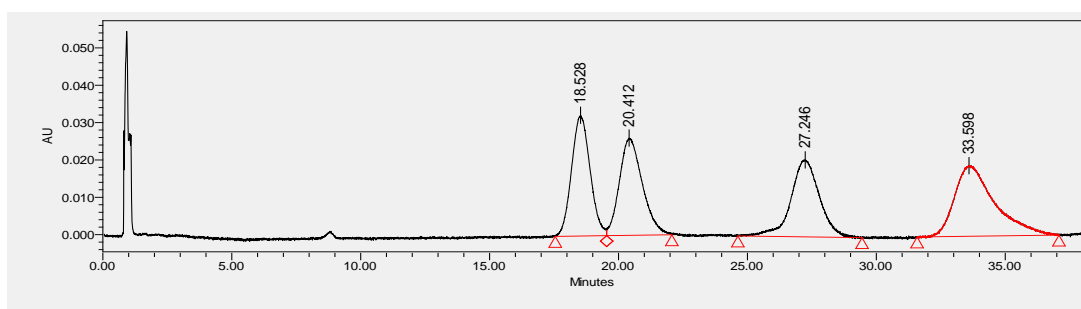

|   | Retention Time | Area    | % Area |
|---|----------------|---------|--------|
| 1 | 18.528         | 1567248 | 27.11  |
| 2 | 20.412         | 1561962 | 27.02  |
| 3 | 27.246         | 1321966 | 22.87  |
| 4 | 33.598         | 1328918 | 22.99  |

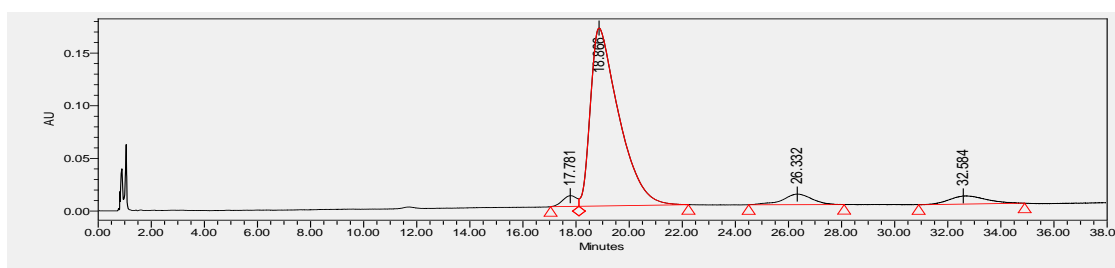

|   | Retention Time | Area     | % Area |
|---|----------------|----------|--------|
| 1 | 17.781         | 377085   | 2.62   |
| 2 | 18.866         | 12517996 | 86.81  |
| 3 | 26.332         | 771702   | 5.35   |
| 4 | 32.584         | 752424   | 5.22   |

**benzyl 3-((tert-butyldimethylsilyl)(phenyl)methyl)-2,3-dihydrobenzo[d]isothiazole-3-carboxylate 1,1-dioxide(3v)**

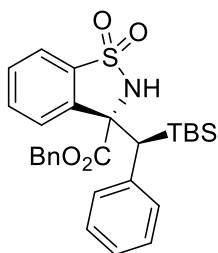

Colorless oil, 34.5 mg, 68% yield, 96% ee, 92:8 dr,  $[\alpha]_D^{20} = -73.5$  ( $c = 0.59$ ,  $\text{CH}_2\text{Cl}_2$ ); **SFC**

Chiralcel OZ-3,  $\text{CO}_2/\text{MeOH} = 95/5$ , 1.0 mL/min,  $\lambda = 220$  nm,  $t_1 = 23.69$  min,  $t_2 = 26.00$  min,

$t_3 = 30.04$  min,  $t_4 = 35.47$  min;

**$^1\text{H NMR}$**  (400 MHz,  $\text{CDCl}_3$ )  $\delta$  7.47 (d,  $J = 8.0$  Hz, 1H), 7.41 (d,  $J = 8.0$  Hz, 1H), 7.37 – 7.32 (m, 6H), 7.27 – 7.24 (m, 2H), 6.98 (s, 2H), 6.90 – 6.86 (m, 2H), 5.80 (s, 1H), 5.21 (s, 2H),

3.59 (s, 1H), 0.63 (s, 9H), 0.22 (s, 3H), 0.00 (s, 3H).

**$^{13}\text{C NMR}$**  (101 MHz,  $\text{CDCl}_3$ )  $\delta$  171.5, 137.4, 136.5, 134.4, 133.9, 132.7, 129.8, 129.0, 128.8, 128.7, 126.2, 126.1, 121.0, 73.3, 69.6, 40.4, 26.7, 17.7, -4.6, -4.8.

**IR** (film,  $\text{cm}^{-1}$ ): 3279, 3030, 2957, 2931, 2857, 1736, 1309, 1255, 1220, 1169, 828, 756, 705;

**HRMS** (ESI<sup>+</sup>)  $m/z$  calcd for  $\text{C}_{28}\text{H}_{33}\text{NNaO}_4\text{SSi}^+$  ( $[\text{M}] + \text{Na}^+$ ) = 530.1792, found 530.1792.

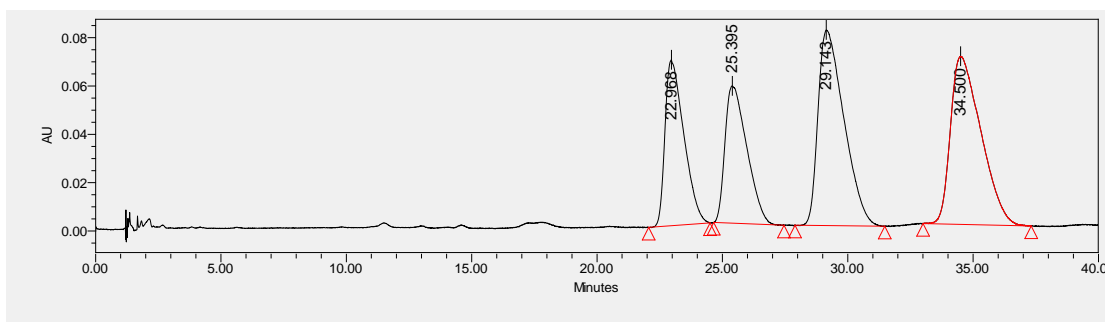

|   | Retention Time | Area    | % Area |
|---|----------------|---------|--------|
| 1 | 22.968         | 3579551 | 19.16  |
| 2 | 25.395         | 3438259 | 18.40  |
| 3 | 29.143         | 5794111 | 31.01  |
| 4 | 34.500         | 5874028 | 31.44  |

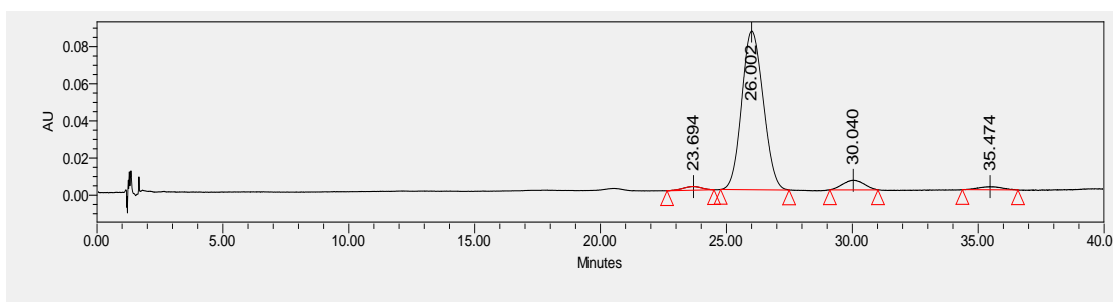

|   | Retention Time | Area    | % Area |
|---|----------------|---------|--------|
| 1 | 23.694         | 100544  | 1.77   |
| 2 | 26.002         | 5100039 | 89.99  |
| 3 | 30.040         | 348371  | 6.15   |
| 4 | 35.474         | 118129  | 2.08   |

benzyl

**(S)-3-((S)-((chloromethyl)dimethylsilyl)(phenyl)methyl)-2,3-dihydrobenzo[d]isothiazole-3-carboxylate 1,1-dioxide(3w)**

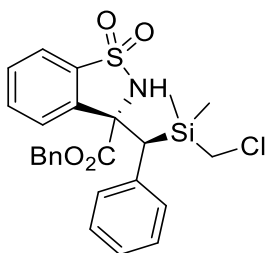

Colorless oil, 33.6 mg, 67% yield, 88% ee, 81:19 dr,  $[\alpha]_D^{20} = -36.2$  ( $c = 0.39$ ,  $\text{CH}_2\text{Cl}_2$ );

**SFC** Chiralcel IG-3,  $\text{CO}_2/\text{MeOH} = 93/7$ , 1.5 mL/min,  $\lambda = 220$  nm,  $t_1 = 14.74$  min,  $t_2 =$

17.19 min,  $t_3 = 18.85$  min,  $t_4 = 21.60$  min;

**$^1\text{H}$  NMR** (400 MHz,  $\text{CDCl}_3$ )  $\delta$  7.41 (dd,  $J_1 = 4.0$ ,  $J_2 = 8.0$  Hz, 1H), 7.27 – 7.17 (m, 9H),

7.11 – 7.08 (m, 1H), 6.90 – 6.87 (m, 2H), 6.81 (t,  $J = 4.0$  Hz, 1H), 5.83 (s, 1H), 5.11 (s,

2H), 3.46 (s, 1H), 2.47 (dd,  $J_1 = 12.0$ ,  $J_2 = 36.0$  Hz, 2H), 0.01 (d,  $J = 12.0$  Hz, 6H).

**$^{13}\text{C}$  NMR** (101 MHz,  $\text{CDCl}_3$ )  $\delta$  171.2, 136.2, 136.0, 134.5, 133.8, 133.0, 130.0, 129.0, 128.8, 128.7, 128.2, 126.4,

126.2, 121.0, 72.0, 69.8, 42.0, 29.6, -4.1.

**IR** (film,  $\text{cm}^{-1}$ ): 3276, 3032, 2956, 2932, 2854, 1735, 1311, 1255, 1222, 1170, 816, 749, 700;

**HRMS** ( $\text{ESI}^+$ )  $m/z$  calcd for  $\text{C}_{25}\text{H}_{26}^{35}\text{ClNNaO}_4\text{SSi}^+$  ( $[\text{M}] + \text{Na}^+$ ) = 522.0933, found 522.0935;

**HRMS** ( $\text{ESI}^+$ )  $m/z$  calcd for  $\text{C}_{25}\text{H}_{26}^{37}\text{ClNNaO}_4\text{SSi}^+$  ( $[\text{M}] + \text{Na}^+$ ) = 524.0904, found 524.0903.

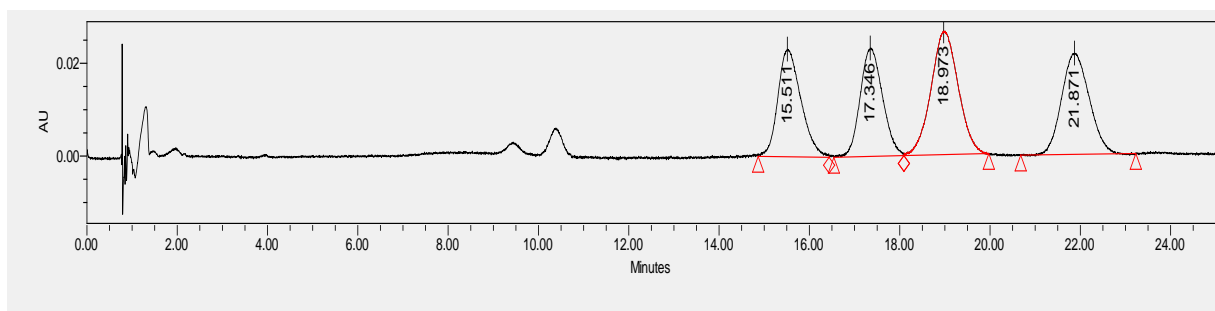

|   | Retention Time | Area   | % Area |
|---|----------------|--------|--------|
| 1 | 15.511         | 748493 | 22.36  |
| 2 | 17.346         | 736586 | 22.00  |
| 3 | 18.973         | 930335 | 27.79  |
| 4 | 21.871         | 932683 | 27.86  |

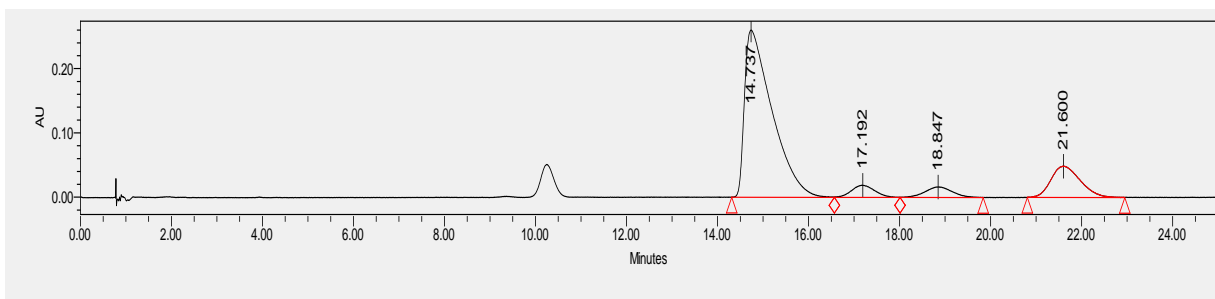

|   | Retention Time | Area     | % Area |
|---|----------------|----------|--------|
| 1 | 14.737         | 10914629 | 75.48  |
| 2 | 17.192         | 674325   | 4.66   |
| 3 | 18.847         | 693571   | 4.80   |
| 4 | 21.600         | 2178479  | 15.06  |

**benzyl (S)-3-((S)-(dimethylsilyl)(phenyl)methyl)-2,3-dihydrobenzo[d]isothiazole-3-carboxylate  
1,1-dioxide(3x)**

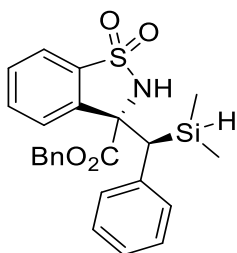

Colorless oil, 25.2 mg, 56% yield, 80%/43% ee, 73:27 dr,  $[\alpha]_D^{20} = -58.4$  ( $c = 0.25$ ,  $\text{CH}_2\text{Cl}_2$ );

**HPLC** Daicel chiralcel IC, *n*-hexane/*i*-PrOH 90/10, 1.0 mL/min,  $\lambda = 220$  nm,  $t_1 = 29.81$  min,  $t_2 = 33.91$  min,  $t_3 = 40.66$  min,  $t_4 = 44.80$  min;

**$^1\text{H}$  NMR** (400 MHz,  $\text{CDCl}_3$ )  $\delta$  7.54 (dd,  $J_1 = 7.8$ ,  $J_2 = 8.0$  Hz, 2H), 7.45 – 7.33 (m, 8H), 7.16 (d,  $J = 8.0$  Hz, 2H), 7.05 (t,  $J = 8.0$  Hz, 2H), 5.89 (s, 1H), 5.26 (dd,  $J_1 = 12.0$ ,  $J_2 = 16.0$

Hz, 2H), 4.06 – 4.02 (m, 1H), 3.30 (d,  $J = 4.0$  Hz, 1H), 0.07 (d,  $J = 4.0$  Hz, 3H), -0.00 (d,  $J = 4.0$  Hz, 3H).

**$^{13}\text{C}$  NMR** (101 MHz,  $\text{CDCl}_3$ )  $\delta$  170.8, 137.7, 136.2, 136.0, 134.6, 134.1, 133.6, 133.0, 130.0, 129.0, 129.0, 128.7, 128.1, 126.3, 125.9, 121.1, 72.3, 69.5, 42.8, -4.4, -4.7.

**IR** (film,  $\text{cm}^{-1}$ ): 3276, 3035, 2955, 2929, 2855, 1733, 1305, 1259, 1222, 1172, 829, 757, 706;

**HRMS** (ESI<sup>+</sup>)  $m/z$  calcd for  $\text{C}_{24}\text{H}_{25}\text{NNaO}_4\text{SSi}^+$  ( $[\text{M}] + \text{Na}^+$ ) = 474.1166, found 474.1164.

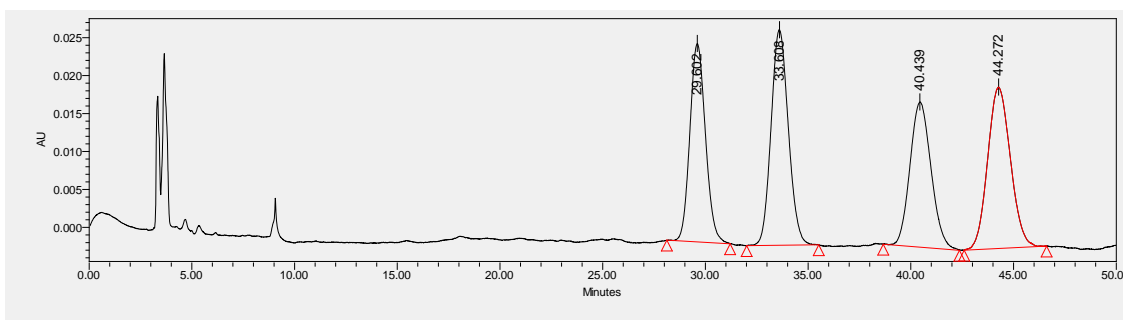

|   | Retention Time | Area    | % Area |
|---|----------------|---------|--------|
| 1 | 29.602         | 1378761 | 22.83  |
| 2 | 33.608         | 1659117 | 27.48  |
| 3 | 40.439         | 1364798 | 22.60  |
| 4 | 44.272         | 1635899 | 27.09  |

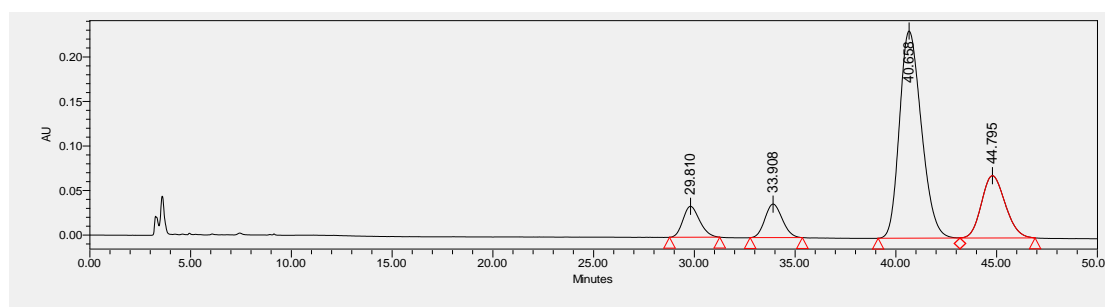

|   | Retention Time | Area     | % Area |
|---|----------------|----------|--------|
| 1 | 29.810         | 1993913  | 7.24   |
| 2 | 33.908         | 2251016  | 8.18   |
| 3 | 40.658         | 17555608 | 63.78  |
| 4 | 44.795         | 5726485  | 20.80  |

**dibenzyl [3,3'-bibenzo[d]isothiazole]-3,3'(2H,2'H)-dicarboxylate 1,1,1',1'-tetraoxide (4a)**

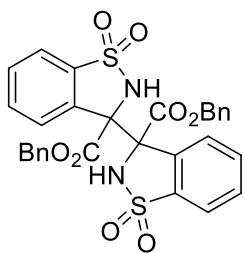

$^1\text{H NMR}$  (400 MHz,  $\text{DMSO-}d_6$ )  $\delta$  9.24 (s, 2H), 7.89 – 7.87 (m, 2H), 7.68 – 7.66 (m, 2H), 7.54 – 7.51 (m, 4H), 7.29 – 7.27 (m, 6H), 7.20 (dd,  $J_1 = 4.0$  Hz,  $J_2 = 8.0$  Hz, 4H), 5.14 – 5.08 (m, 4H).

$^{13}\text{C NMR}$  (101 MHz,  $\text{DMSO-}d_6$ )  $\delta$  168.1, 135.8, 135.2, 133.0, 131.8, 131.3, 128.8, 128.7, 128.6, 128.4, 128.2, 127.8, 121.2, 71.9, 68.5.

**HRMS** (ESI<sup>+</sup>)  $m/z$  calcd for  $\text{C}_{30}\text{H}_{24}\text{N}_2\text{NaO}_8\text{S}_2^+$  ( $[\text{M}] + \text{Na}^+$ ) = 627.0867, found 627.0866.

### 13. Copies of NMR spectra and CD spectra for the reaction substrates and products

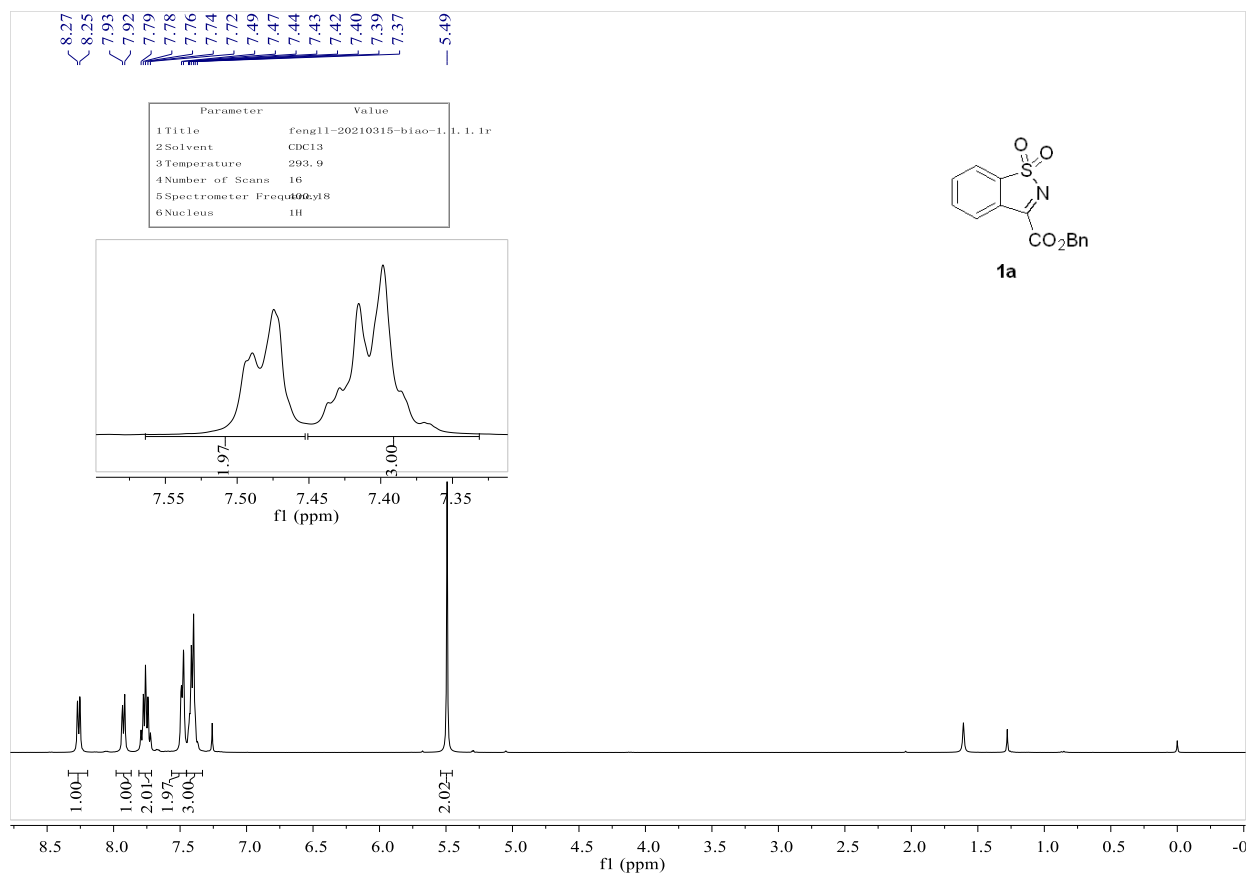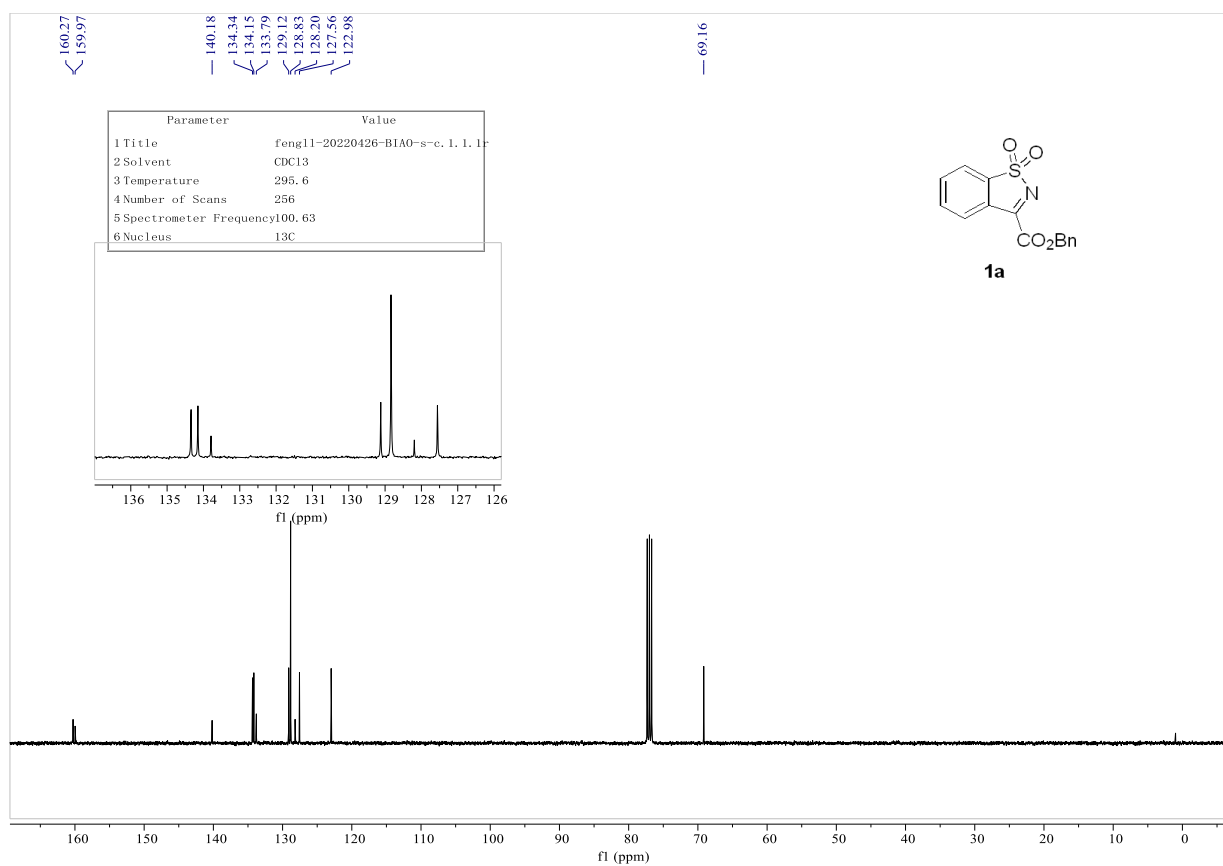

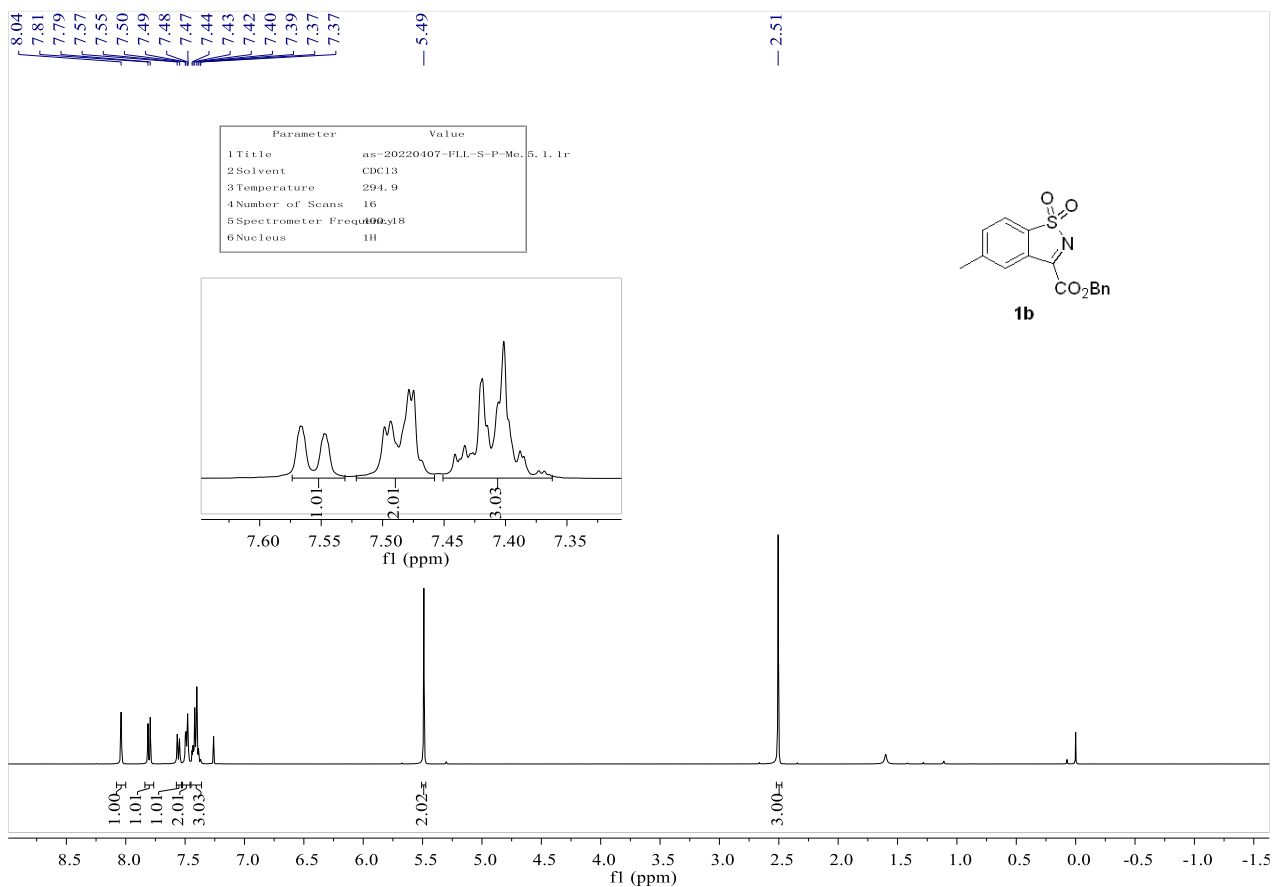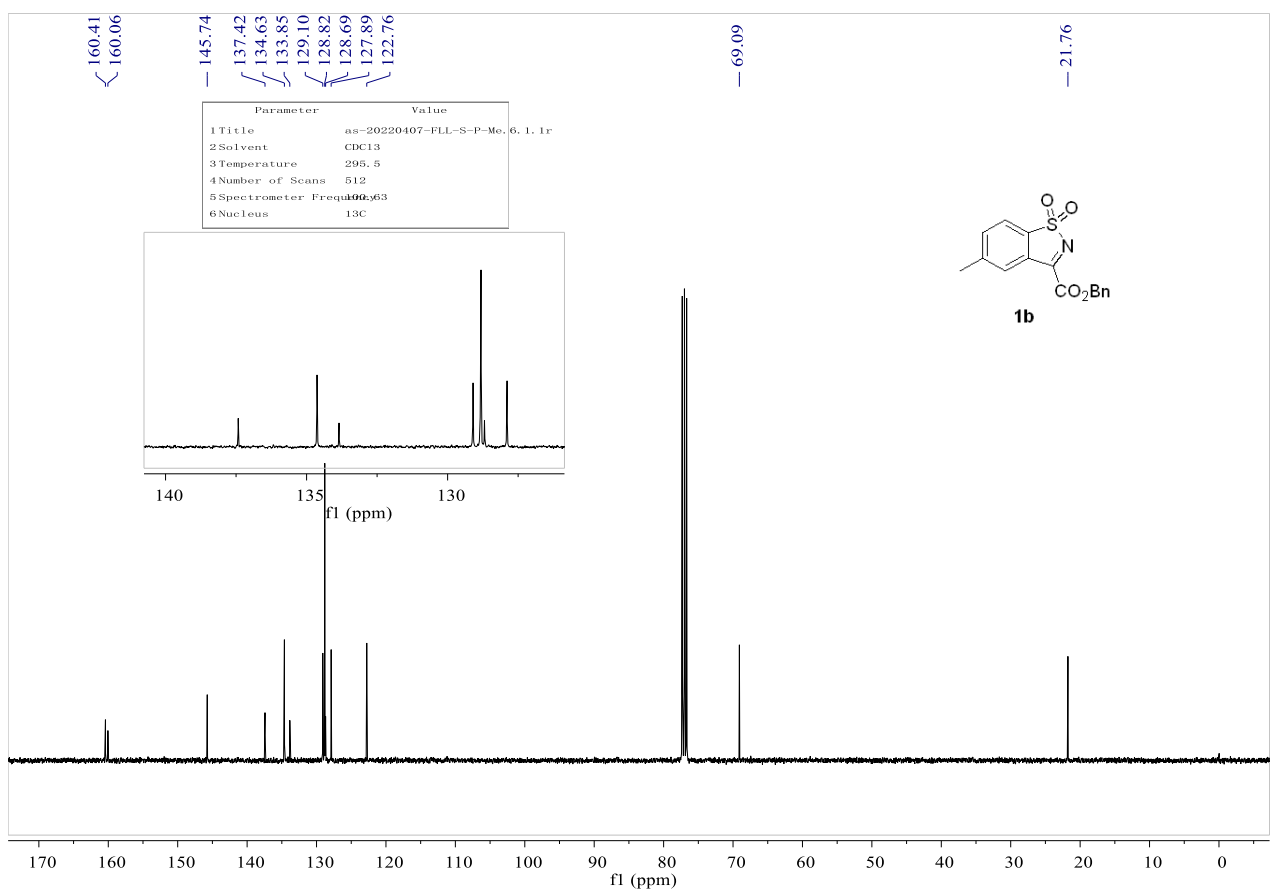



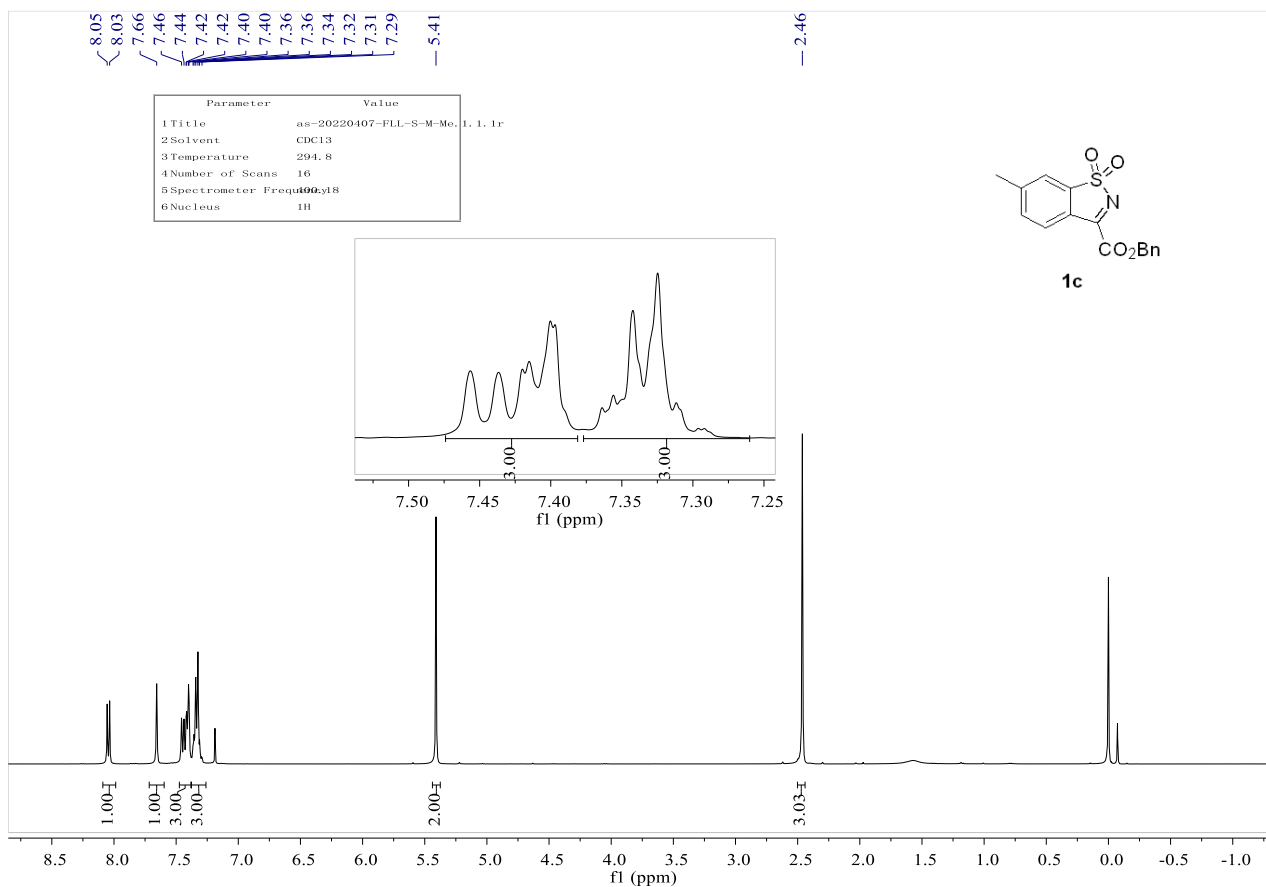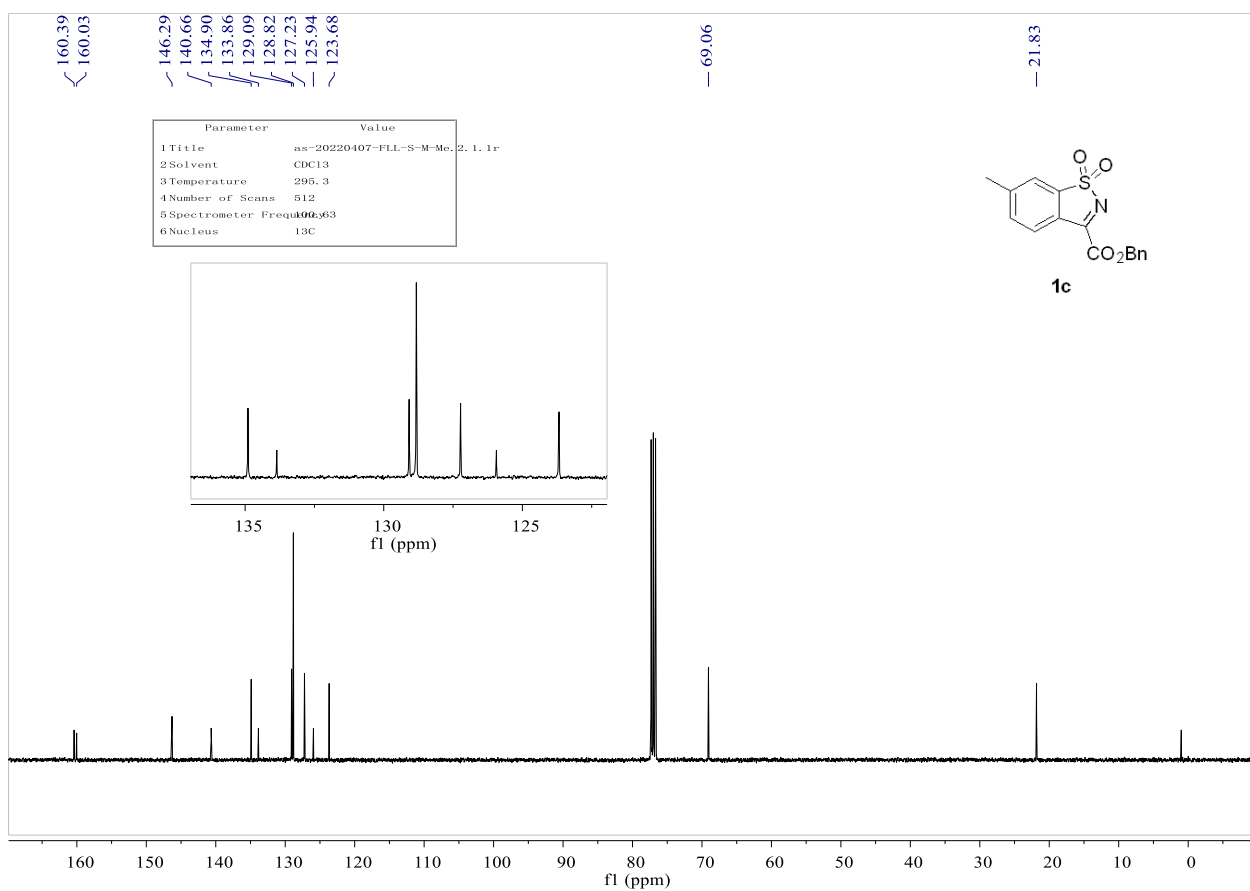

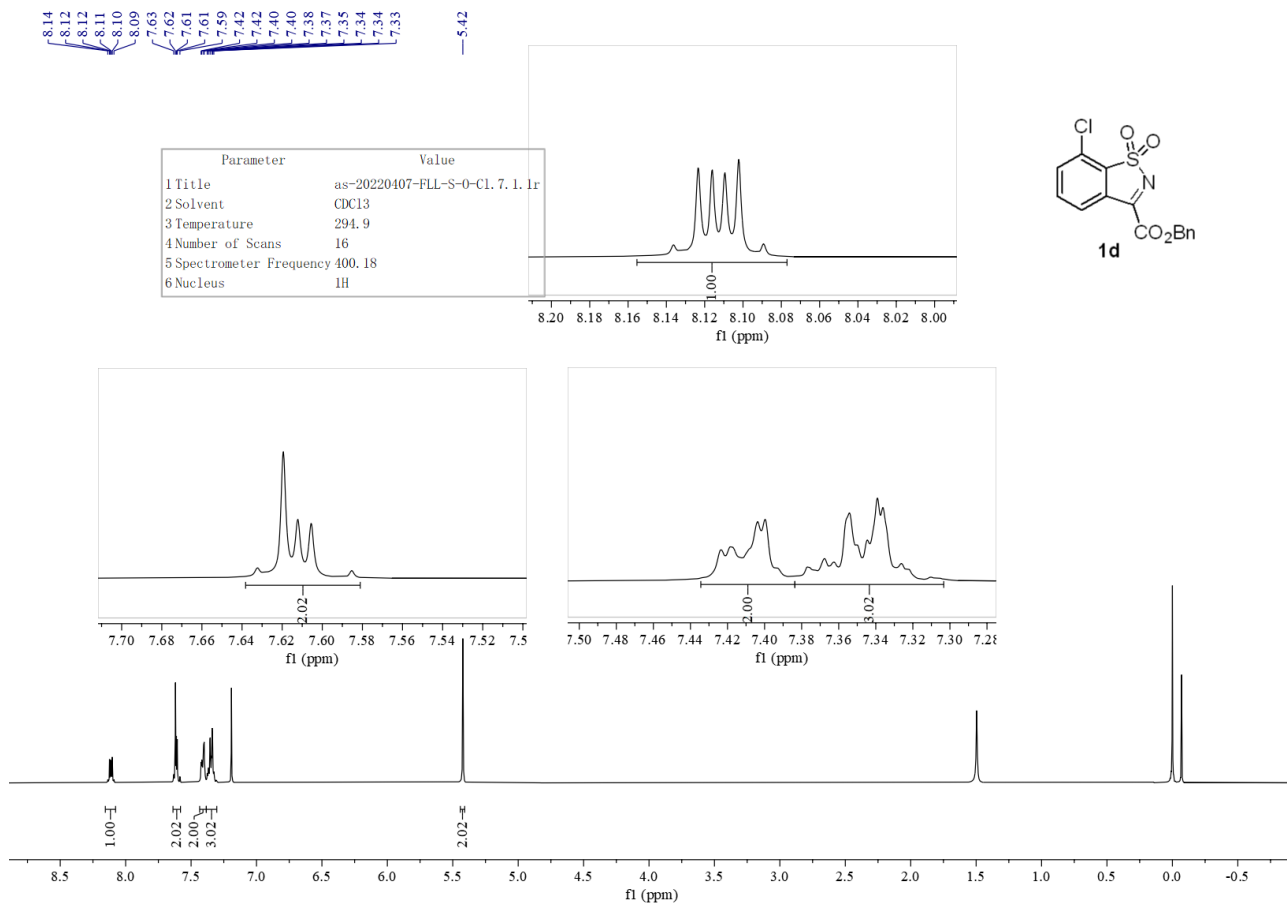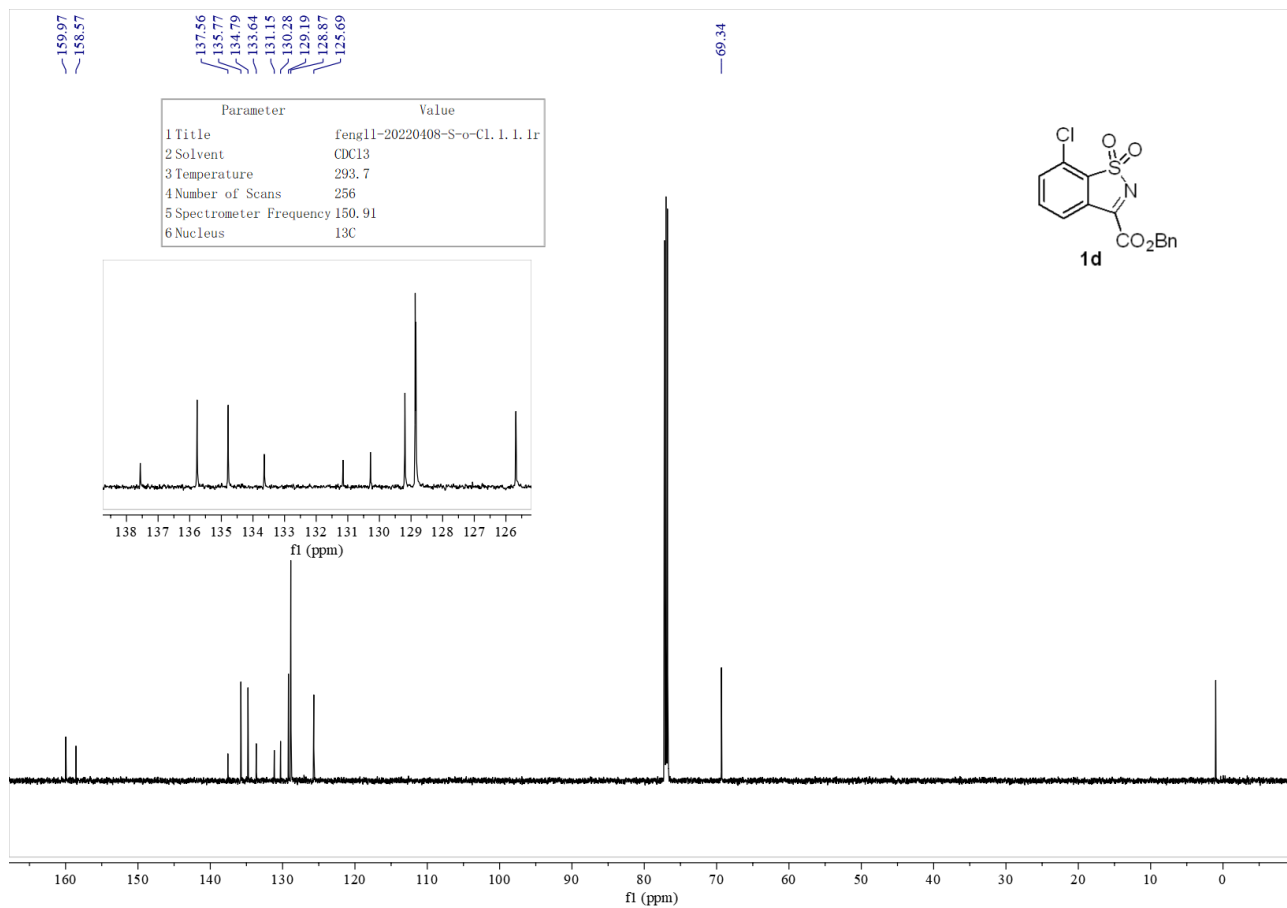

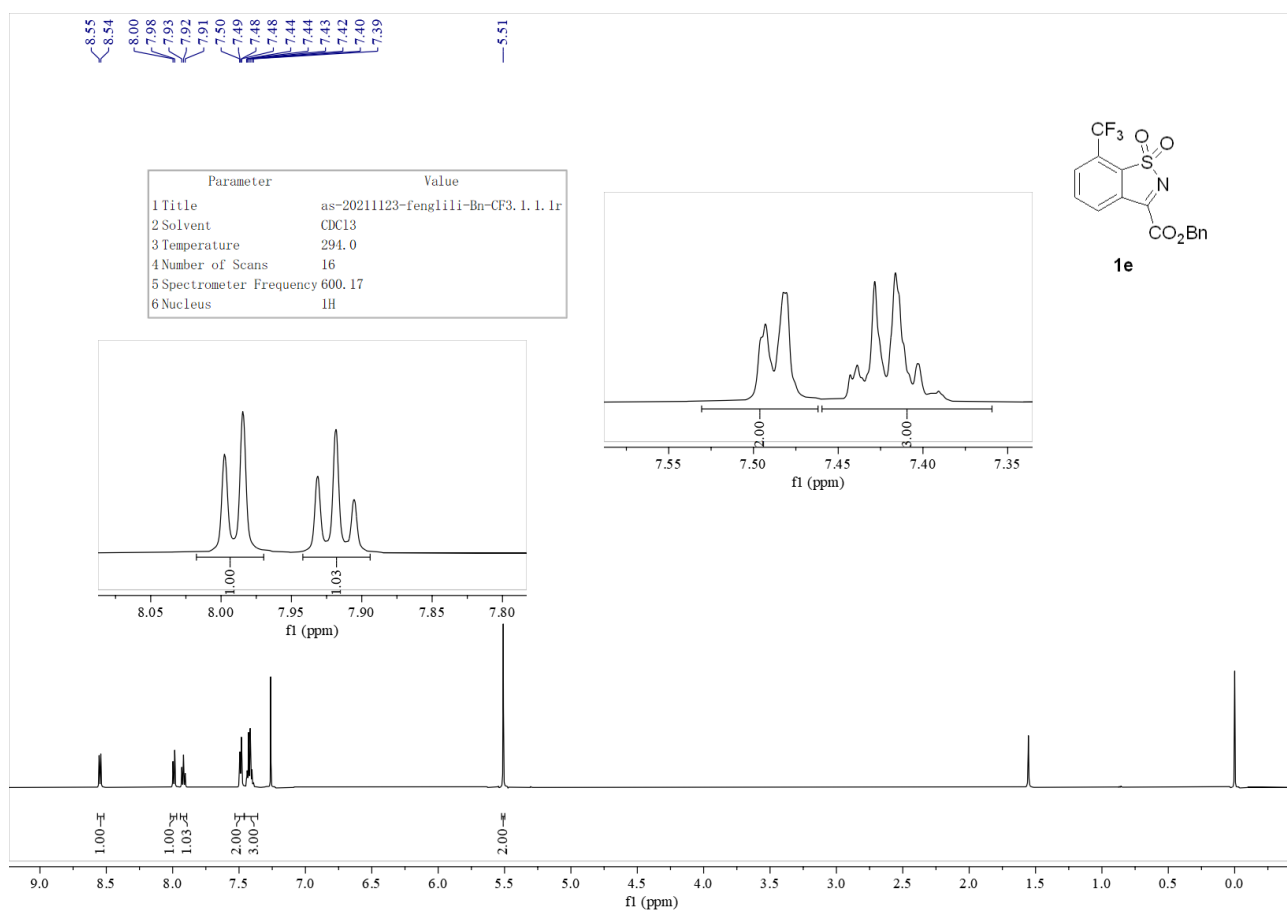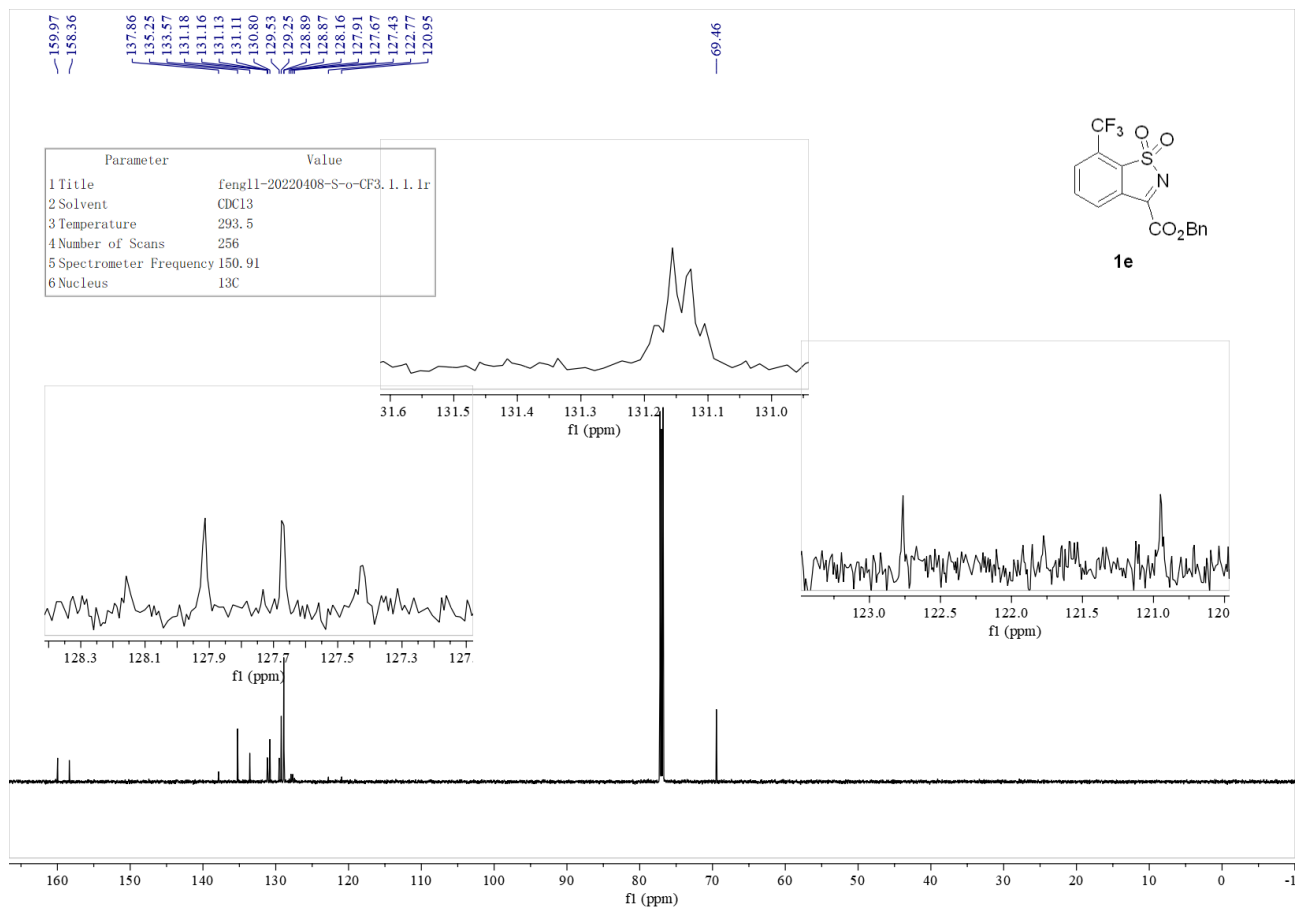

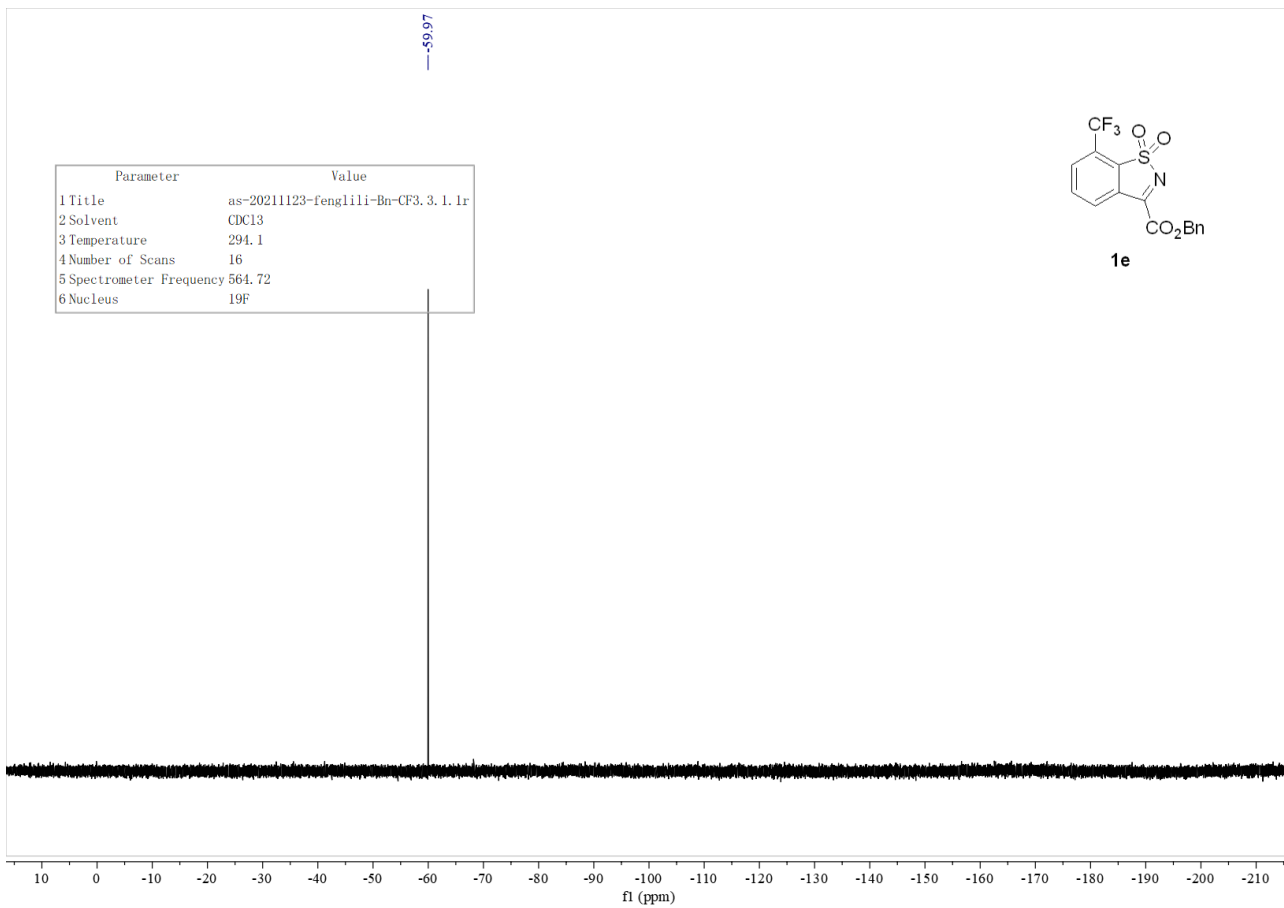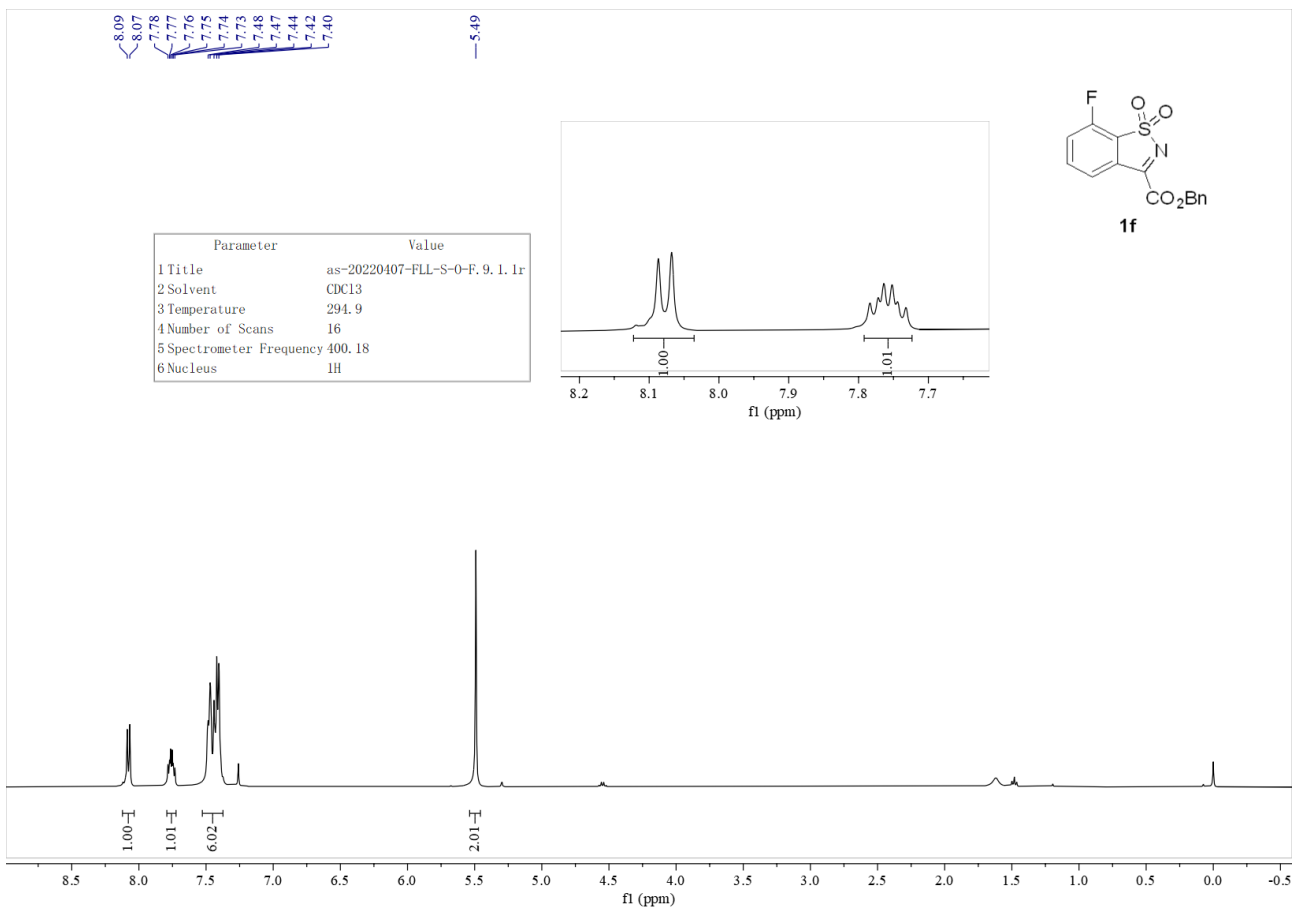

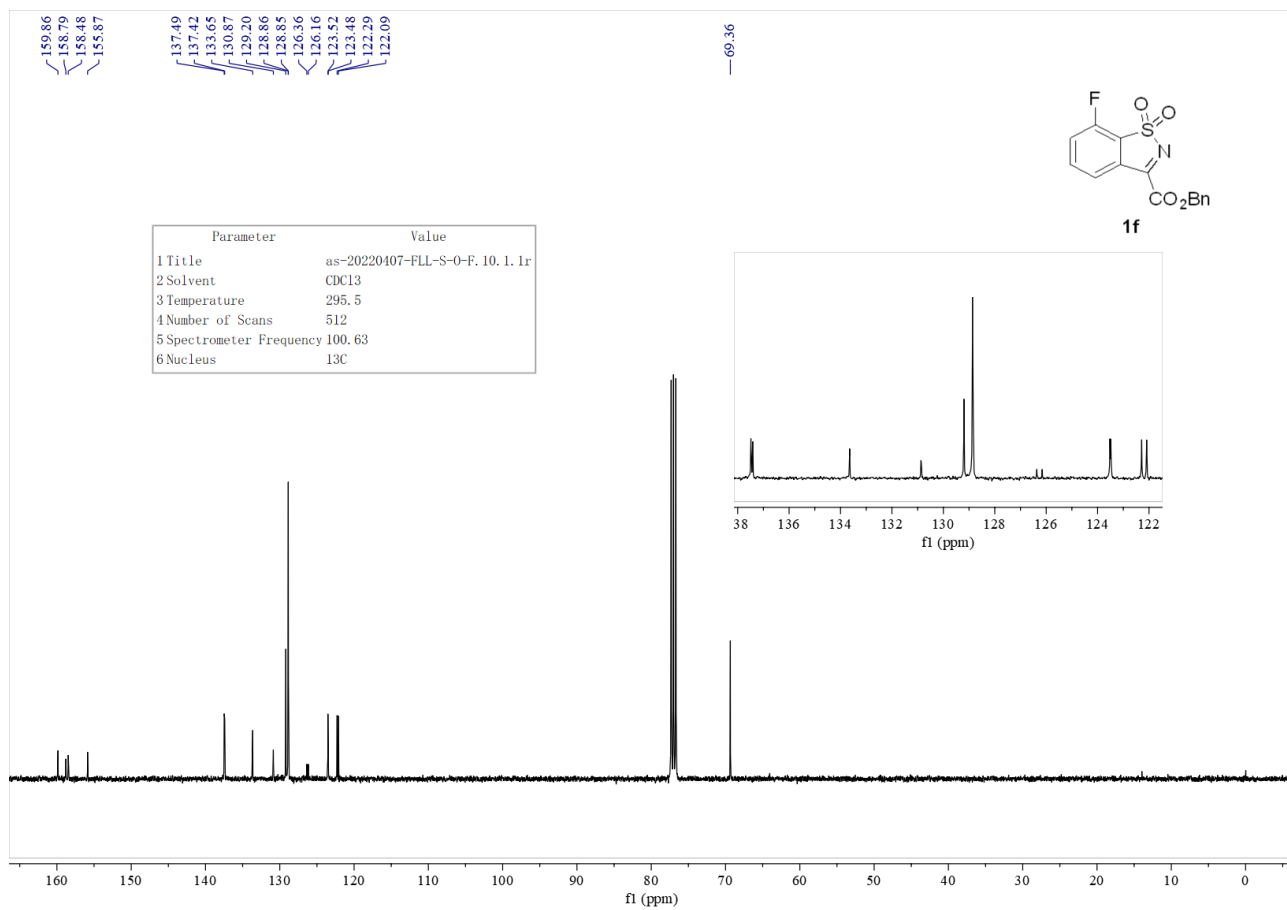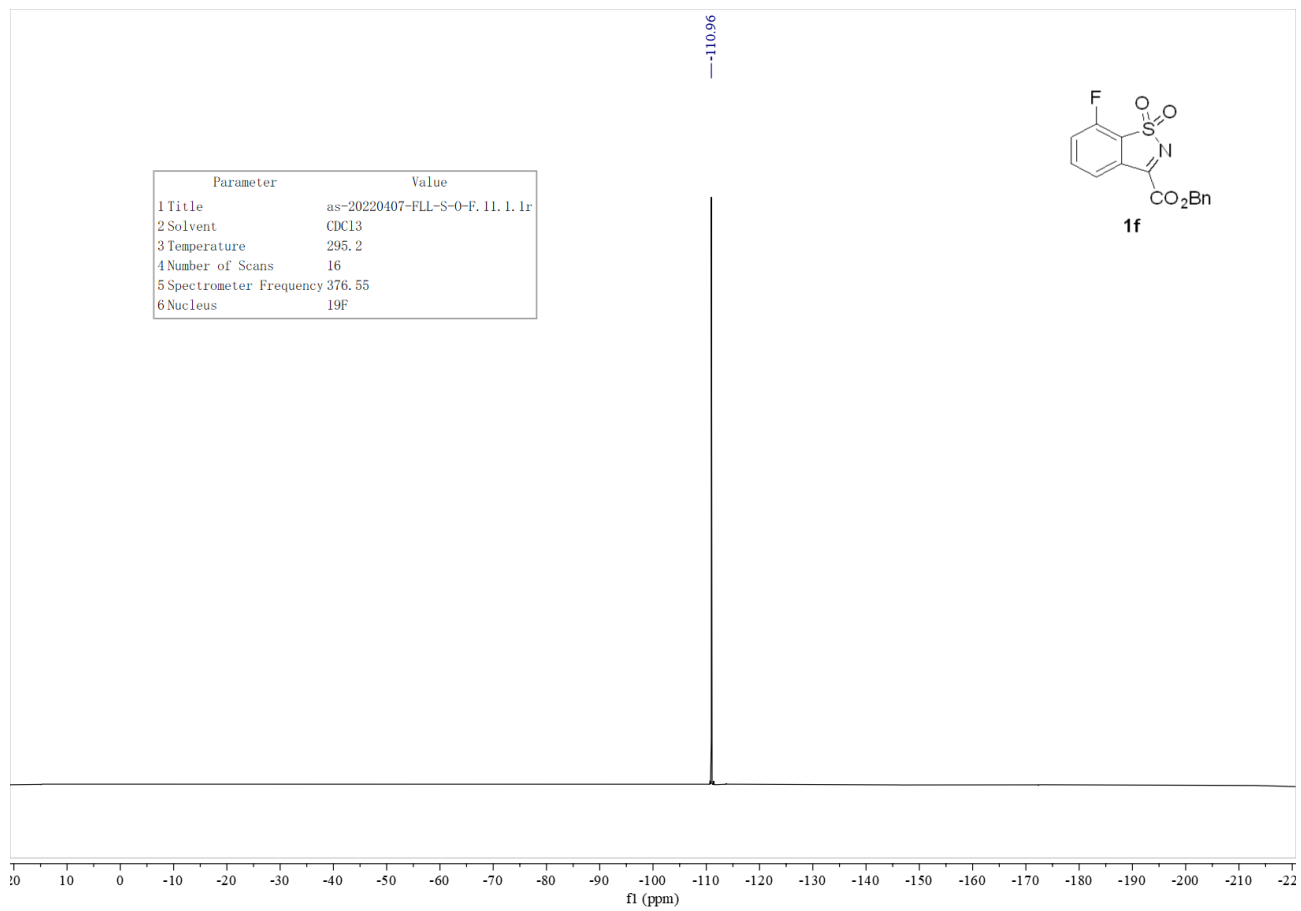

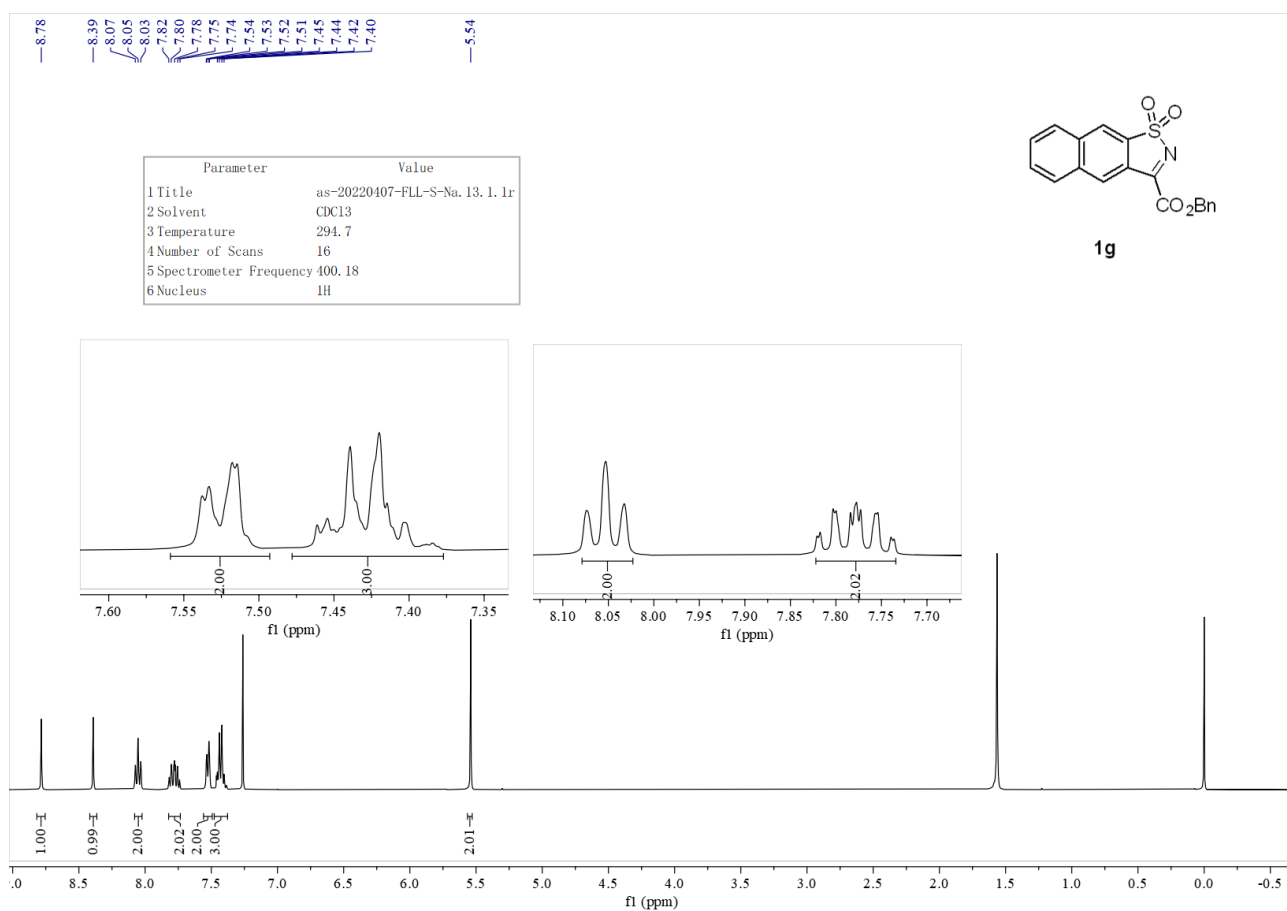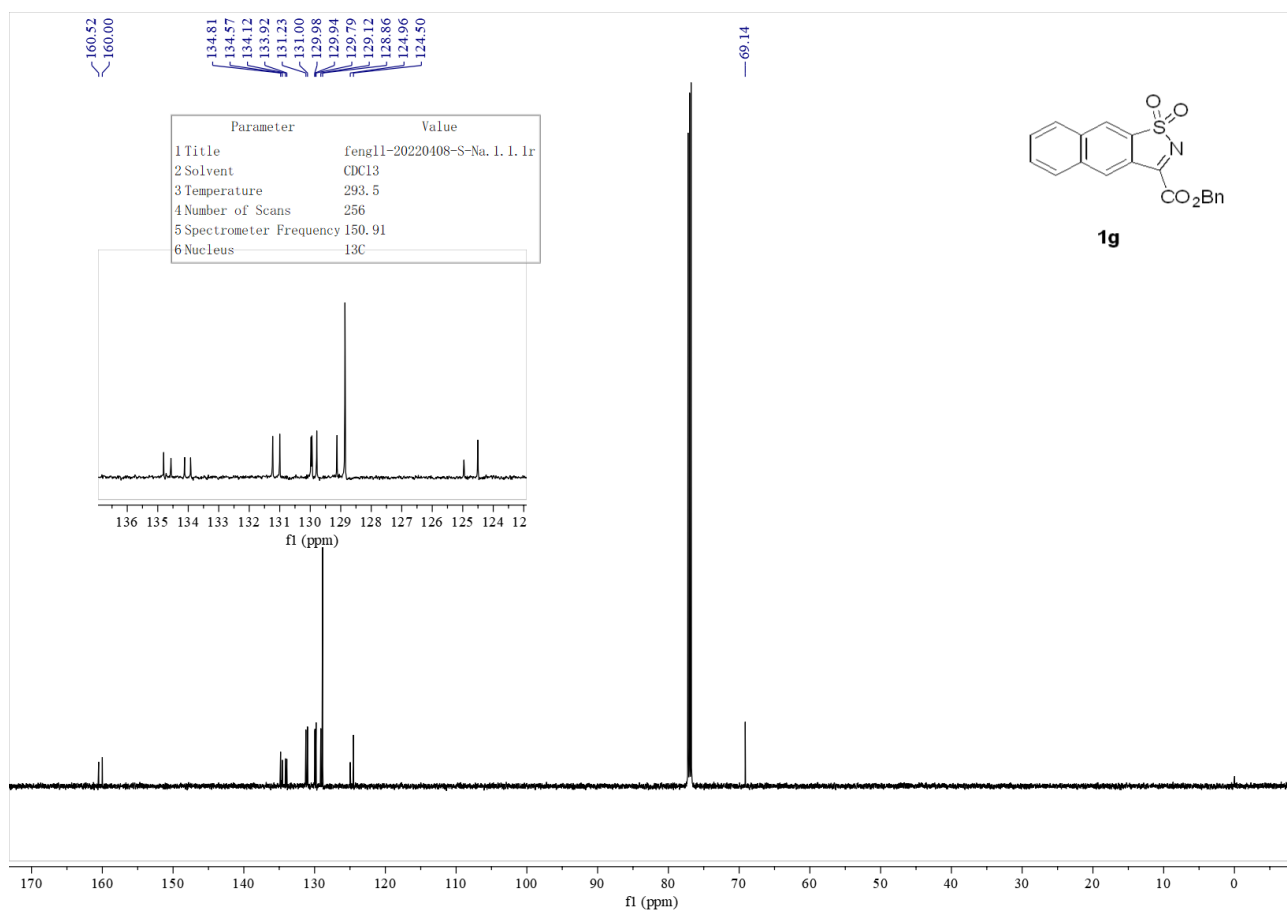

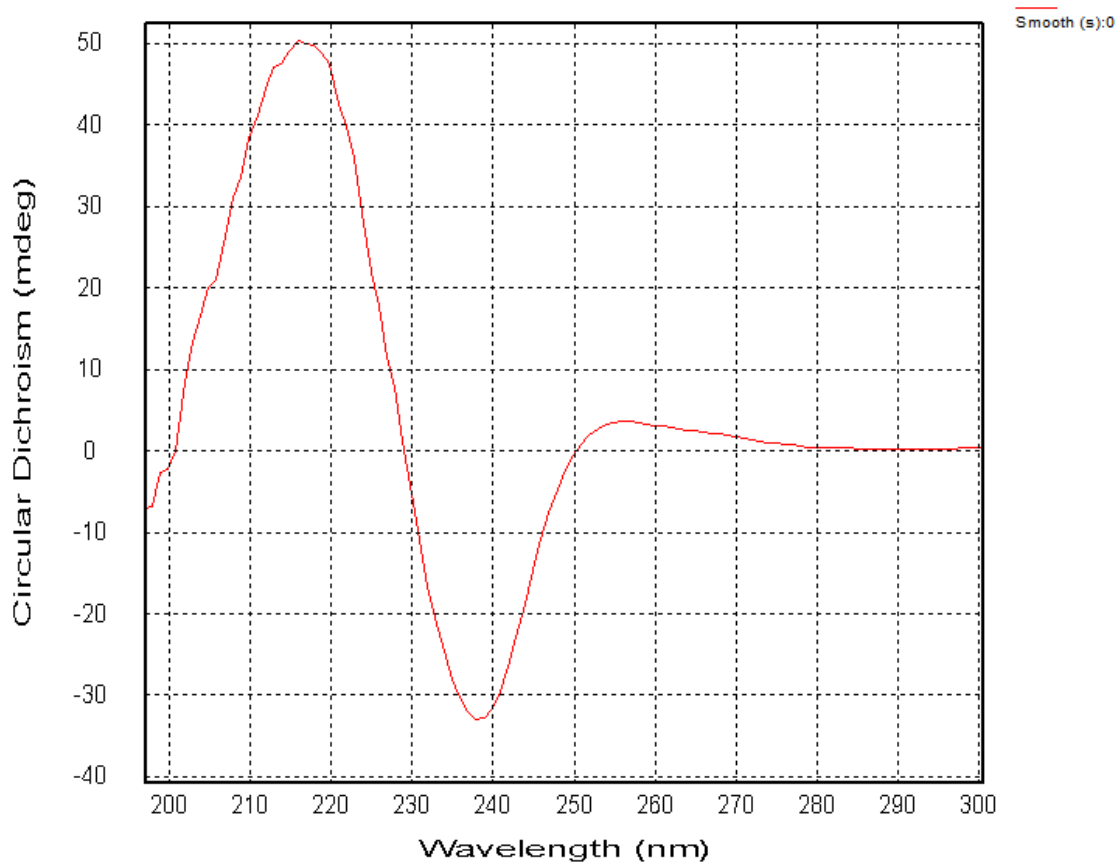

**3a**

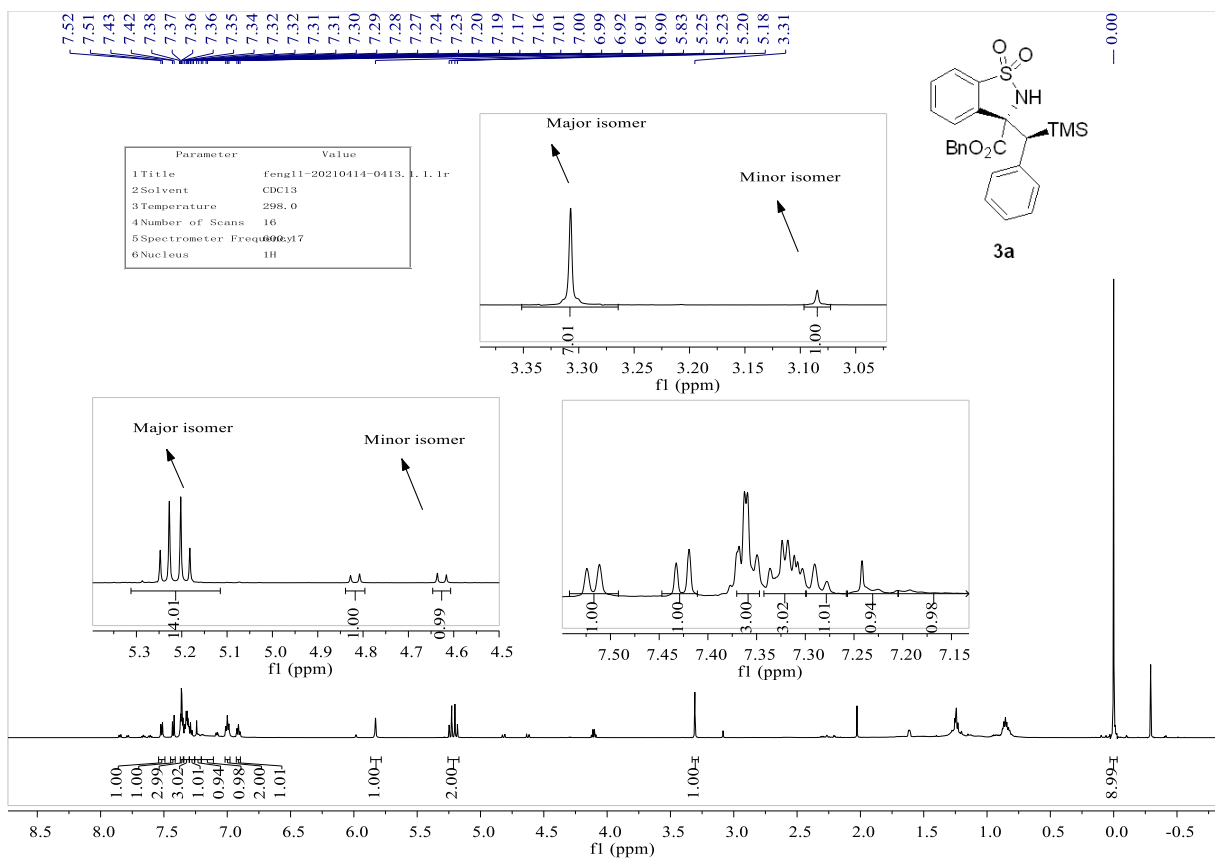

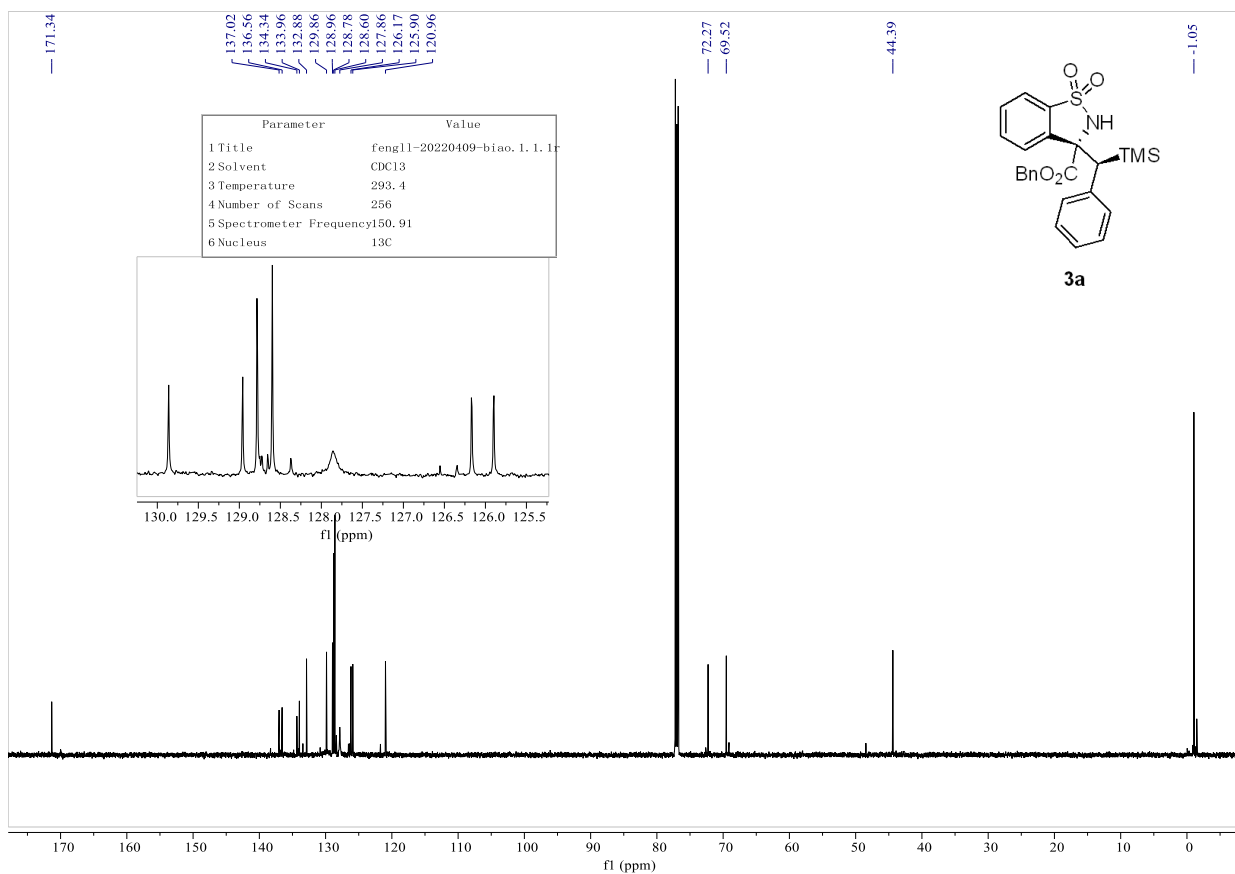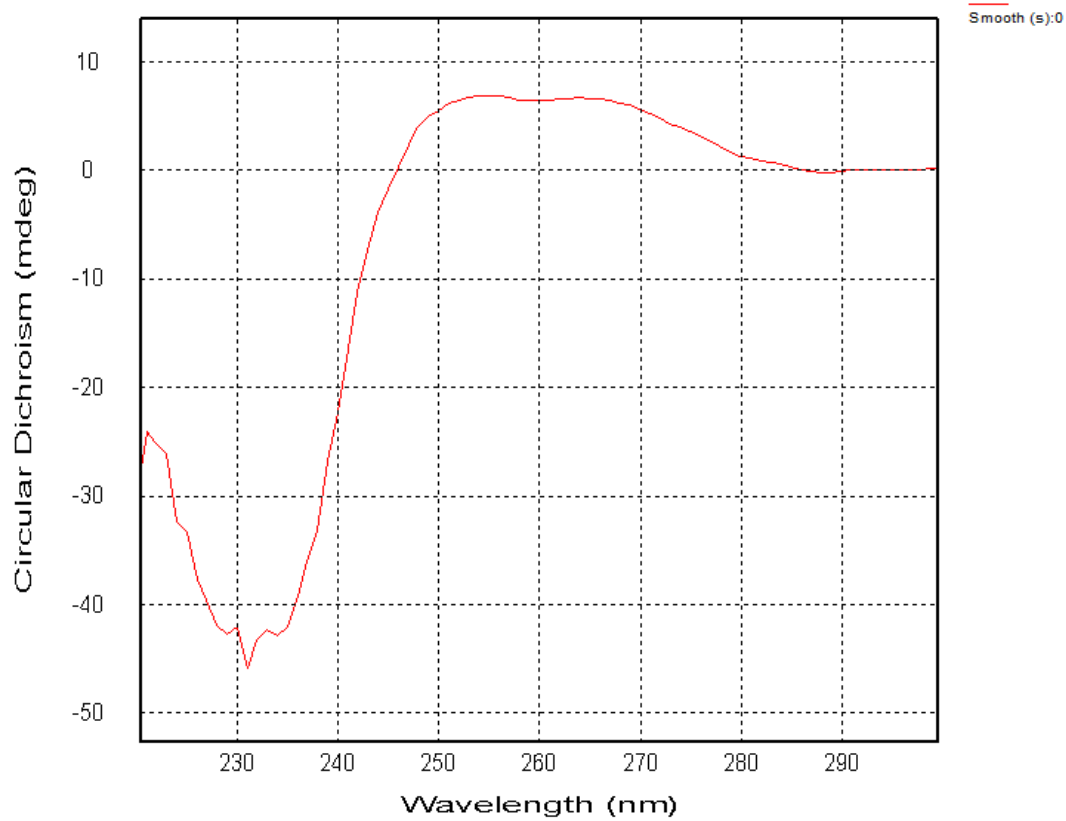

**3b**



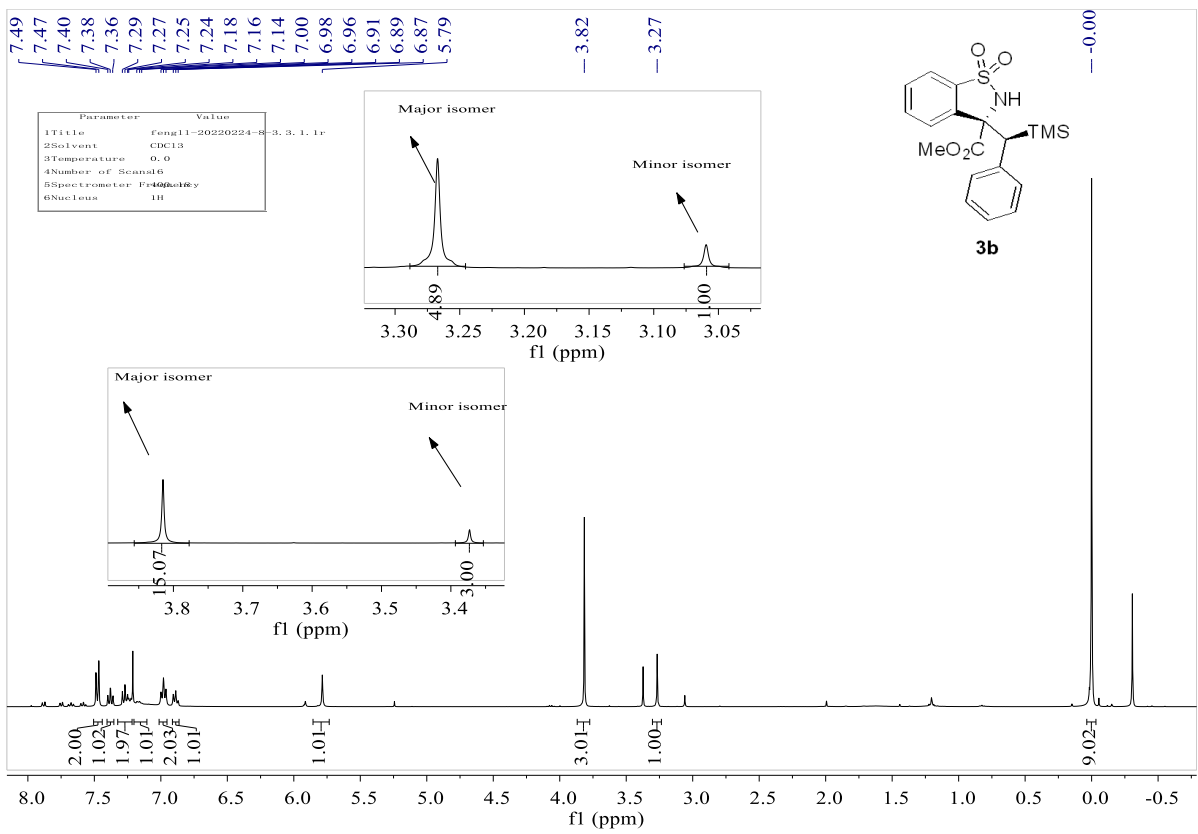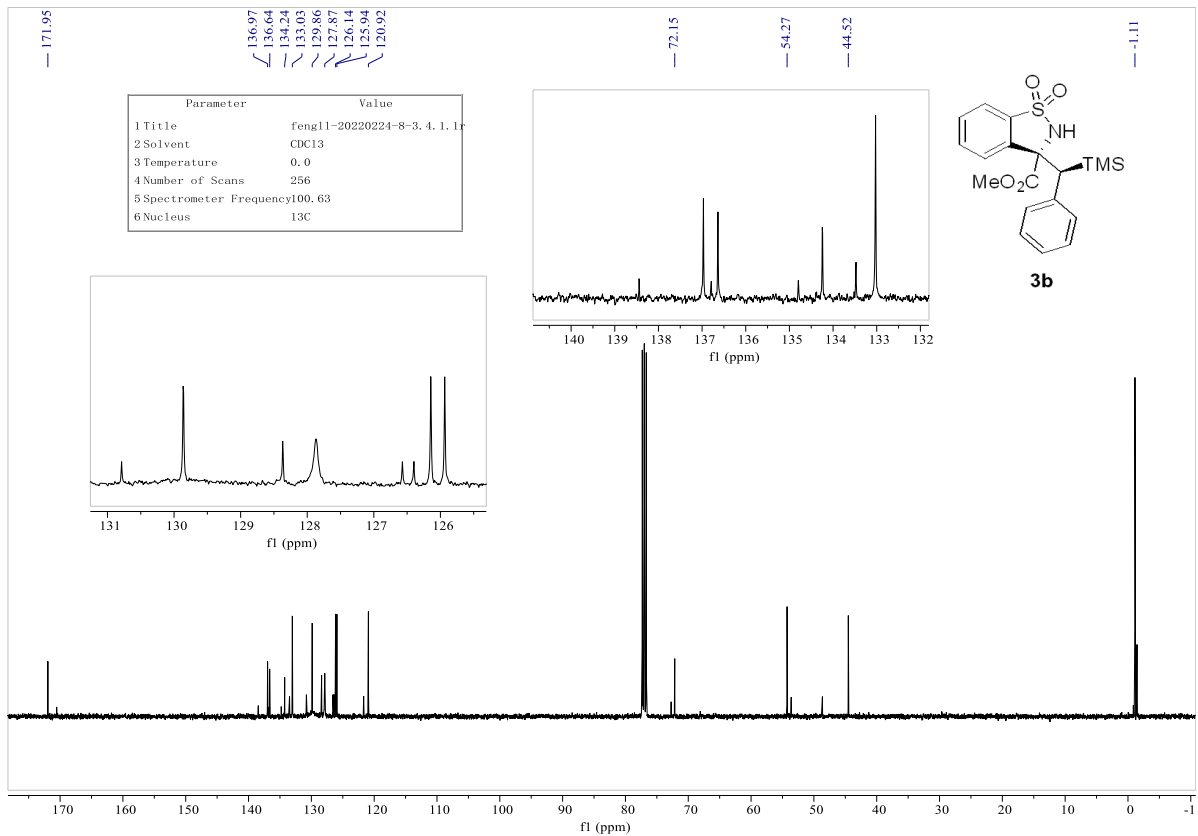

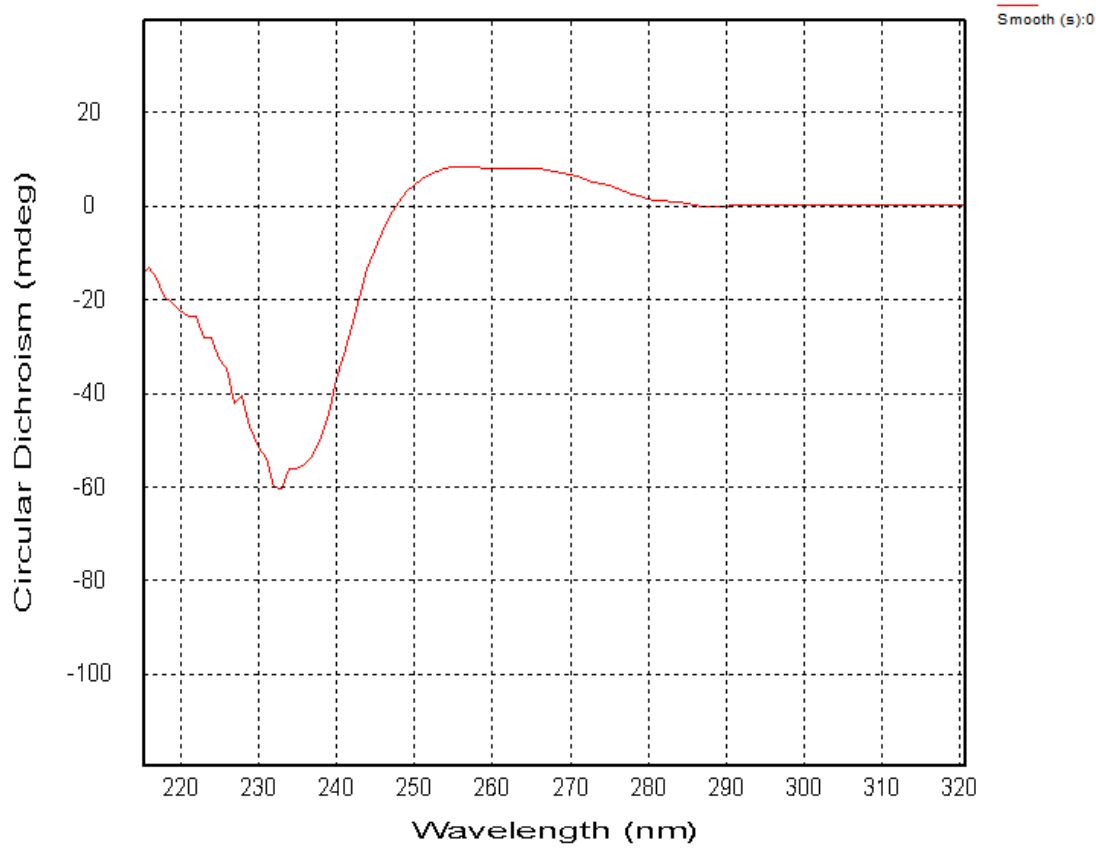

3c

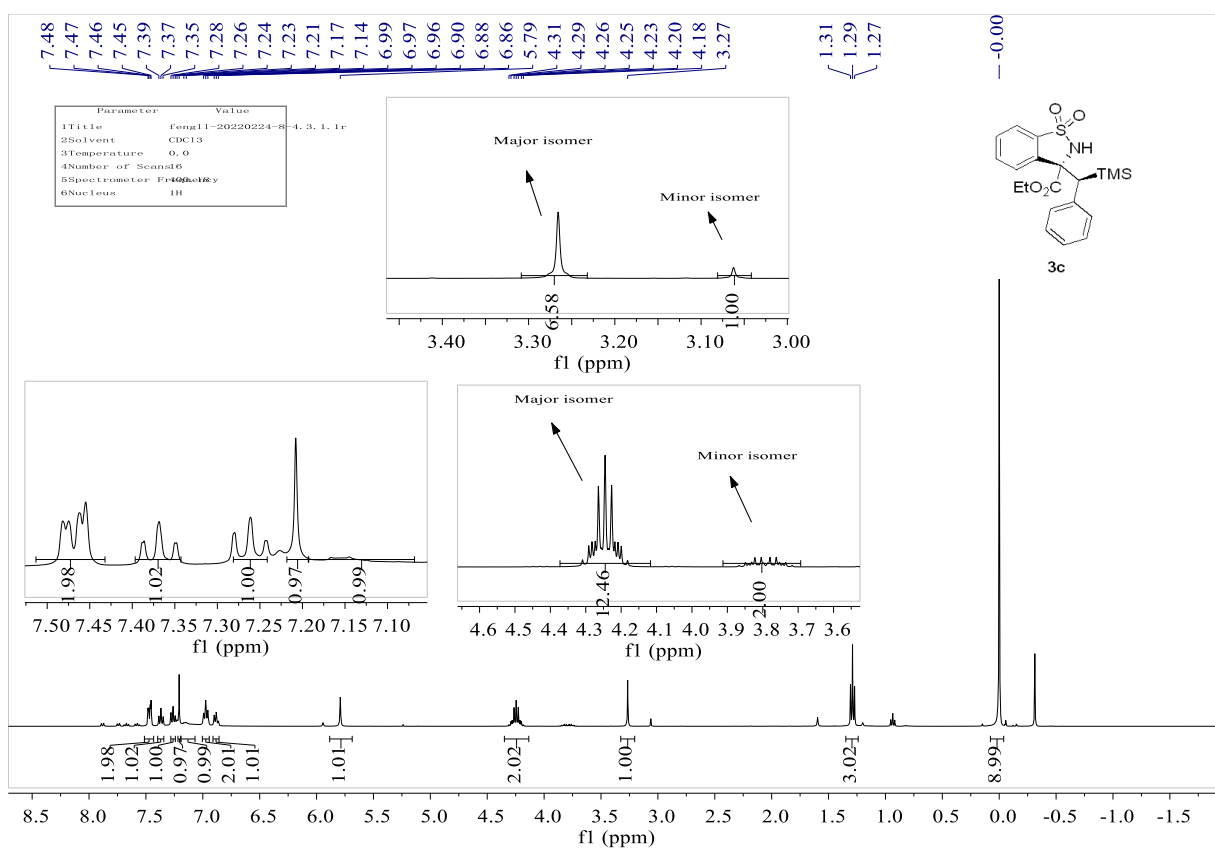

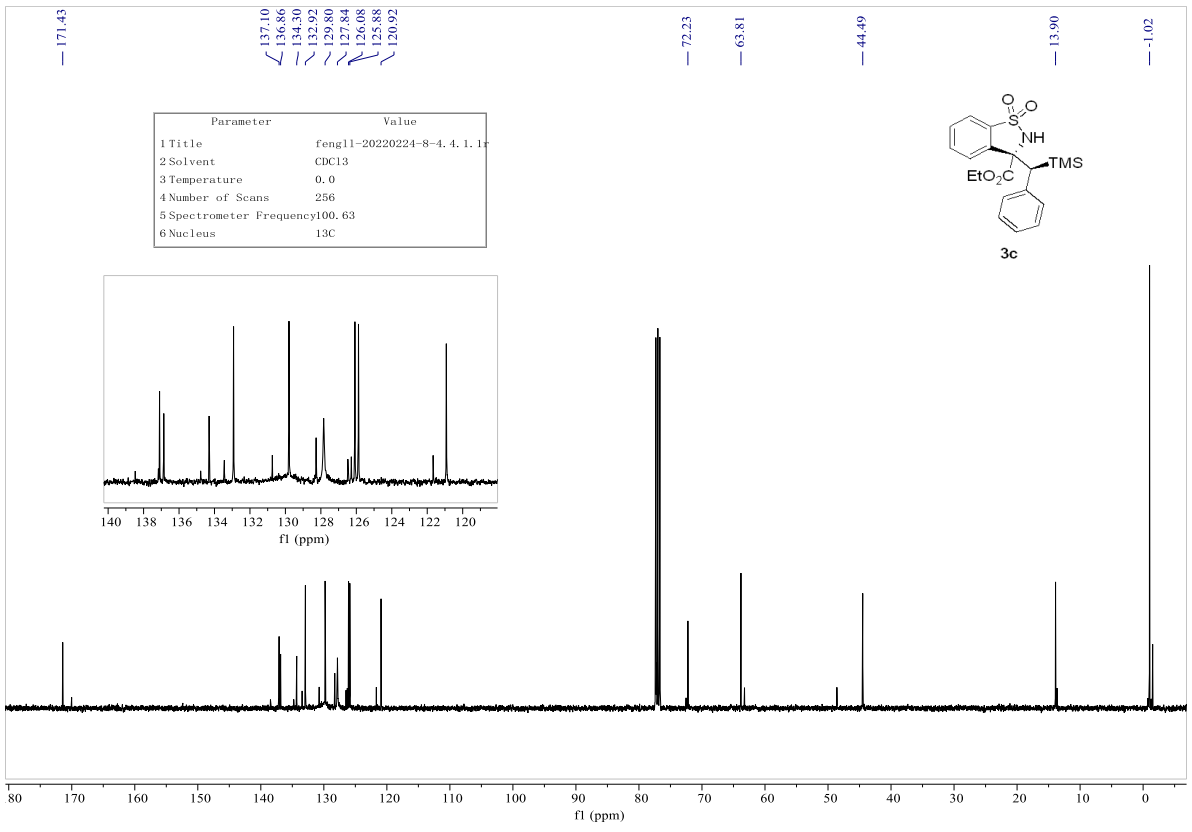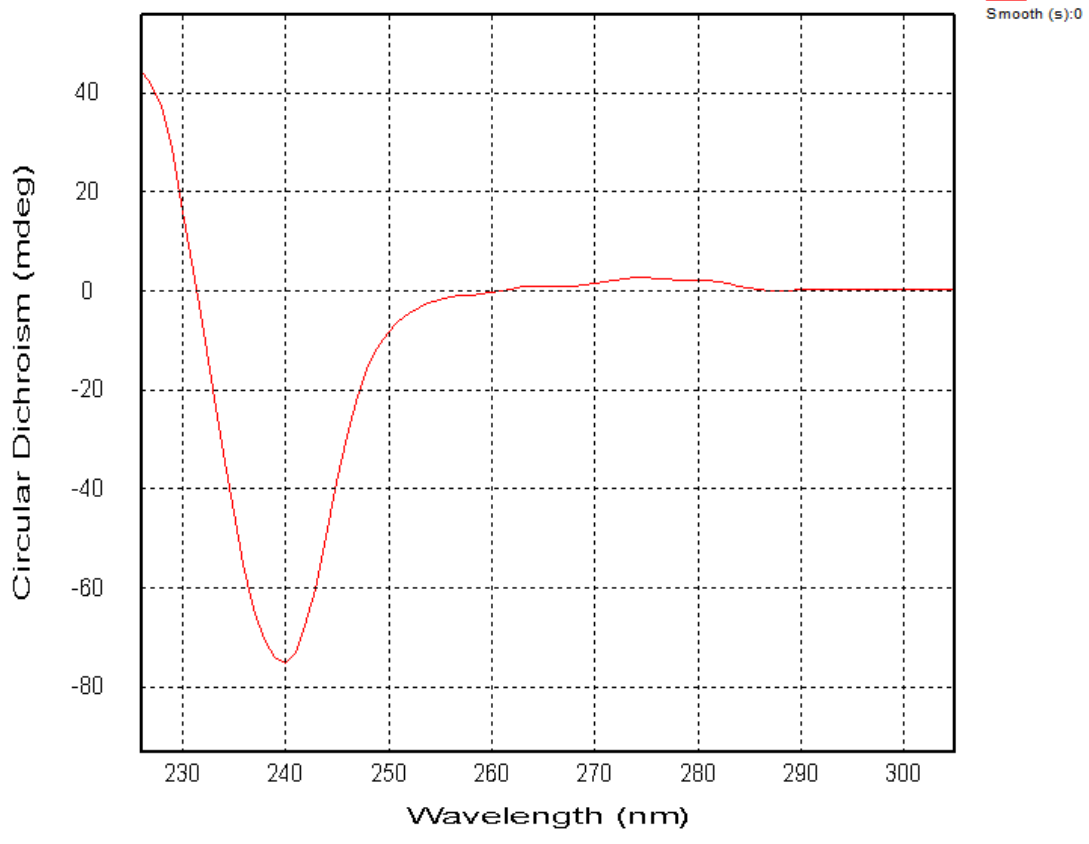

**3d**

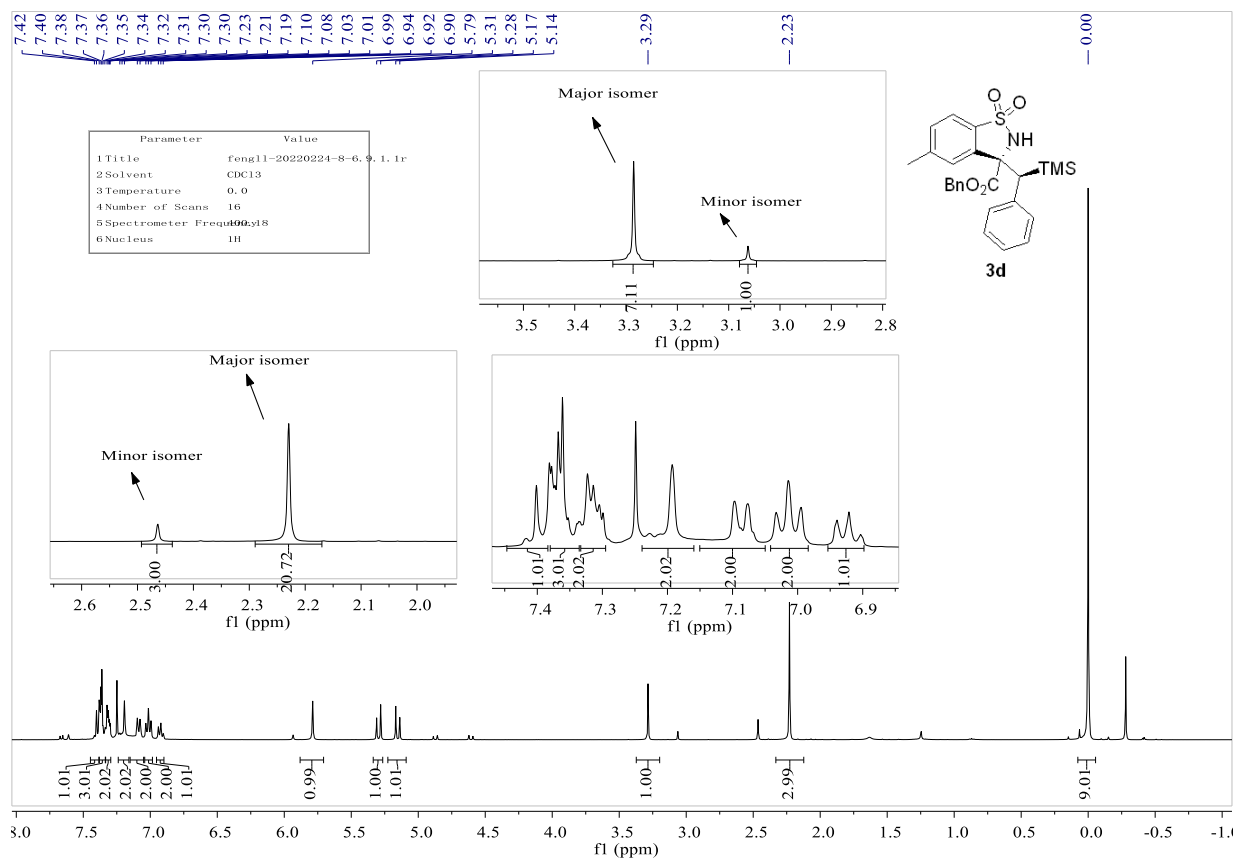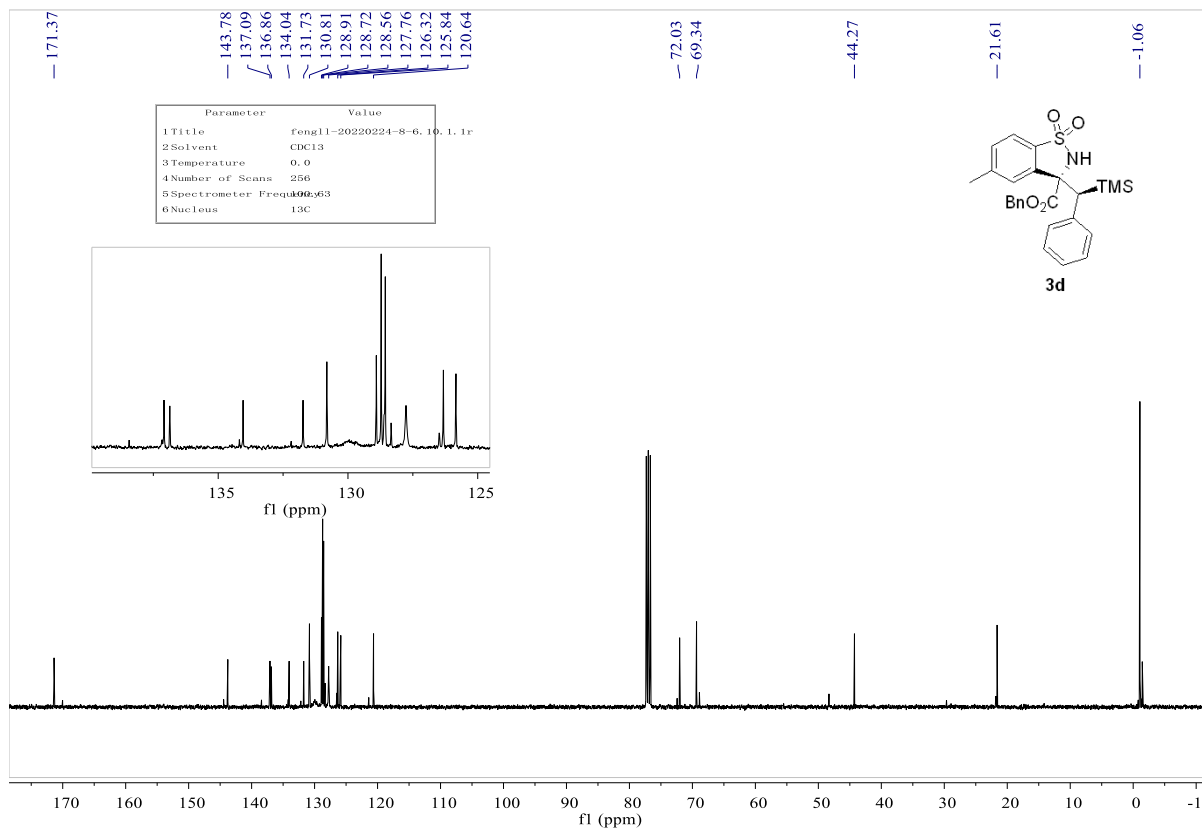

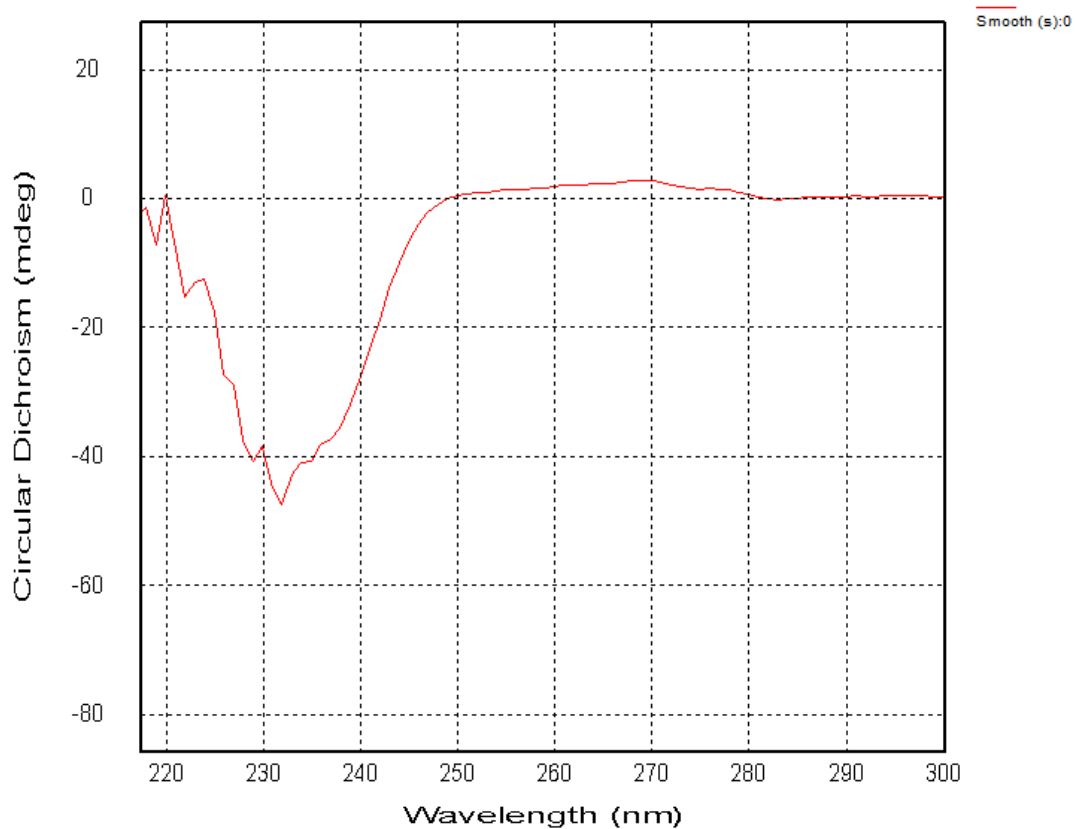

### 3e

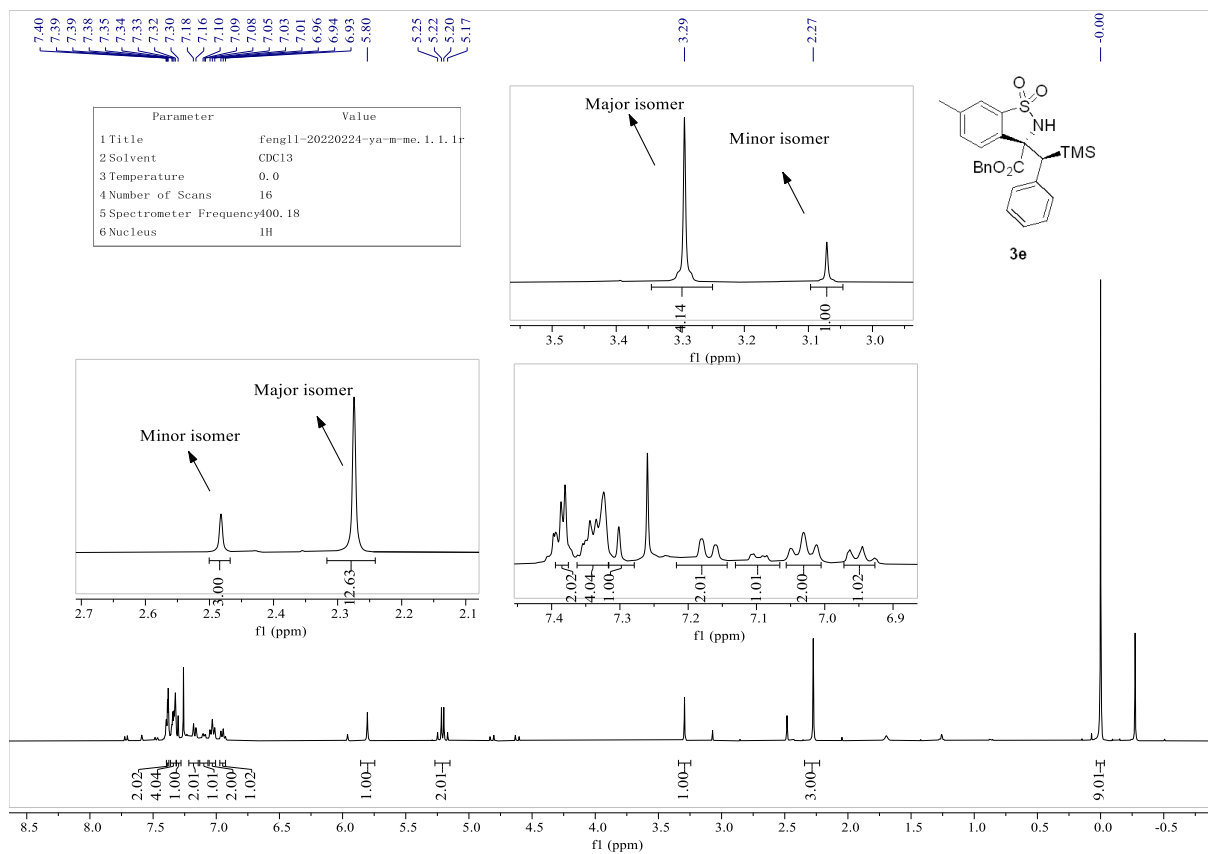

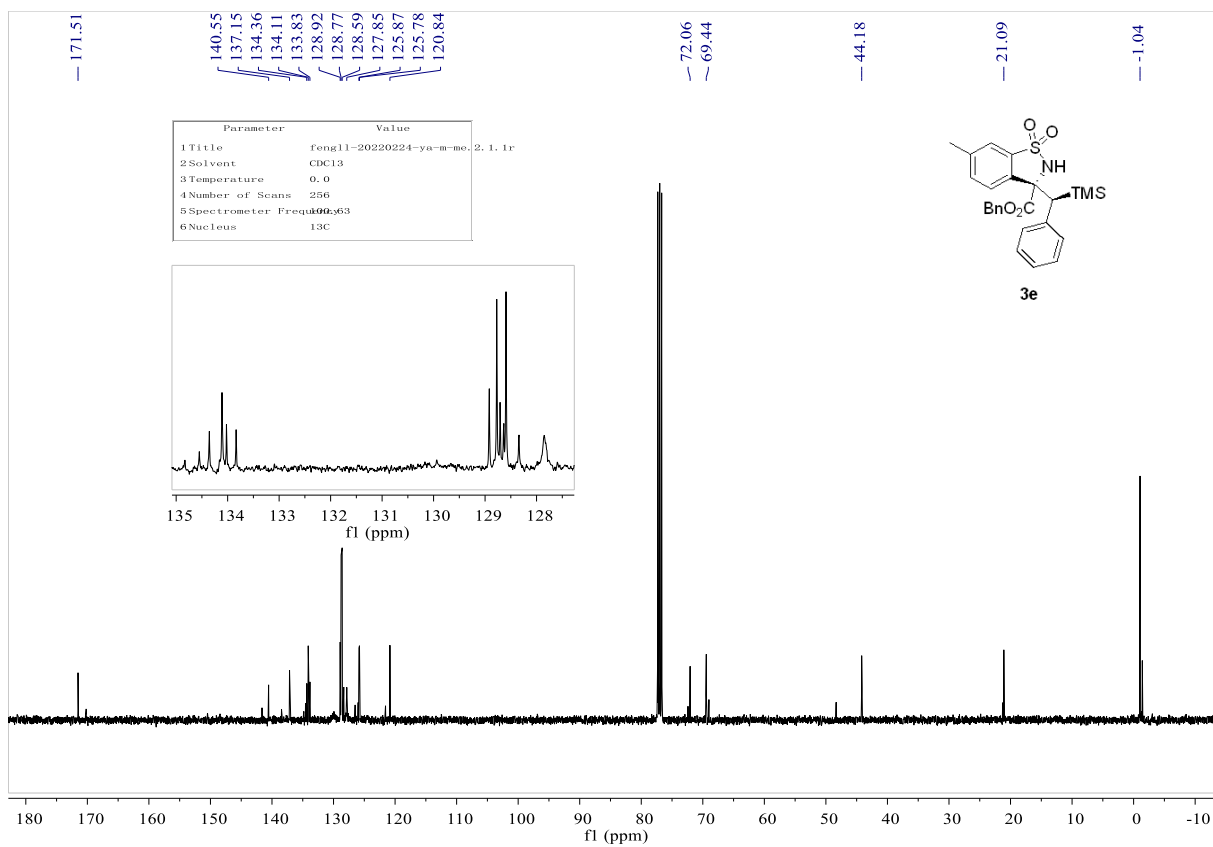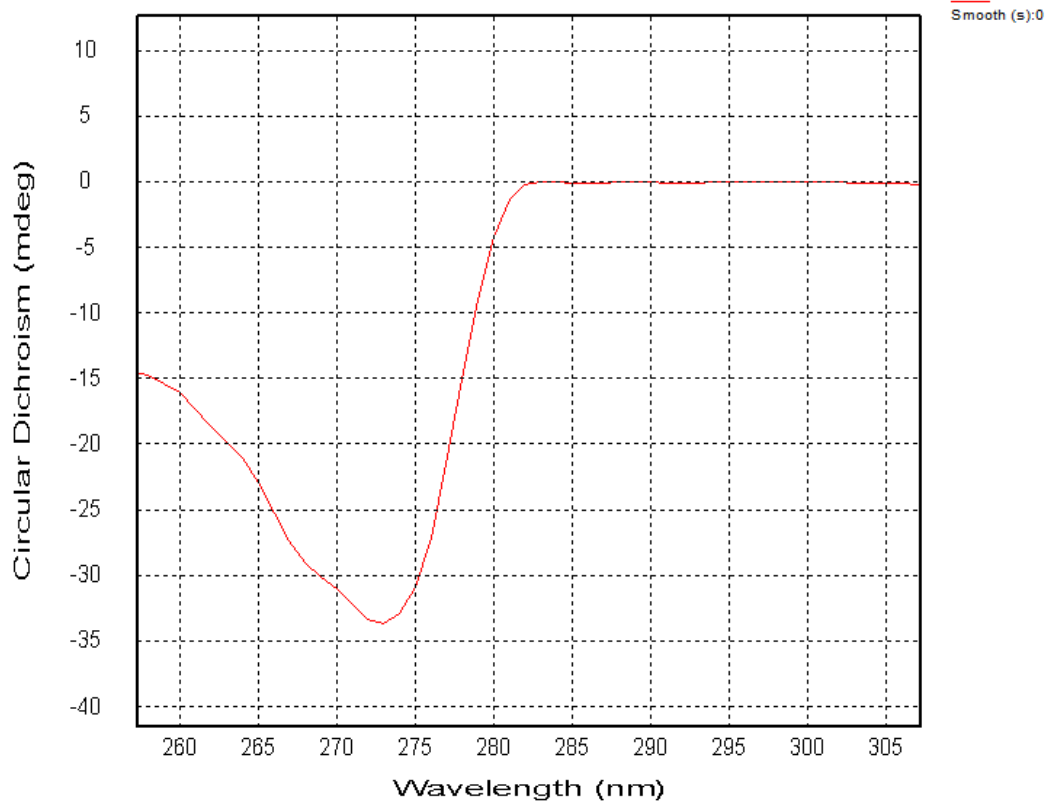

**3f**

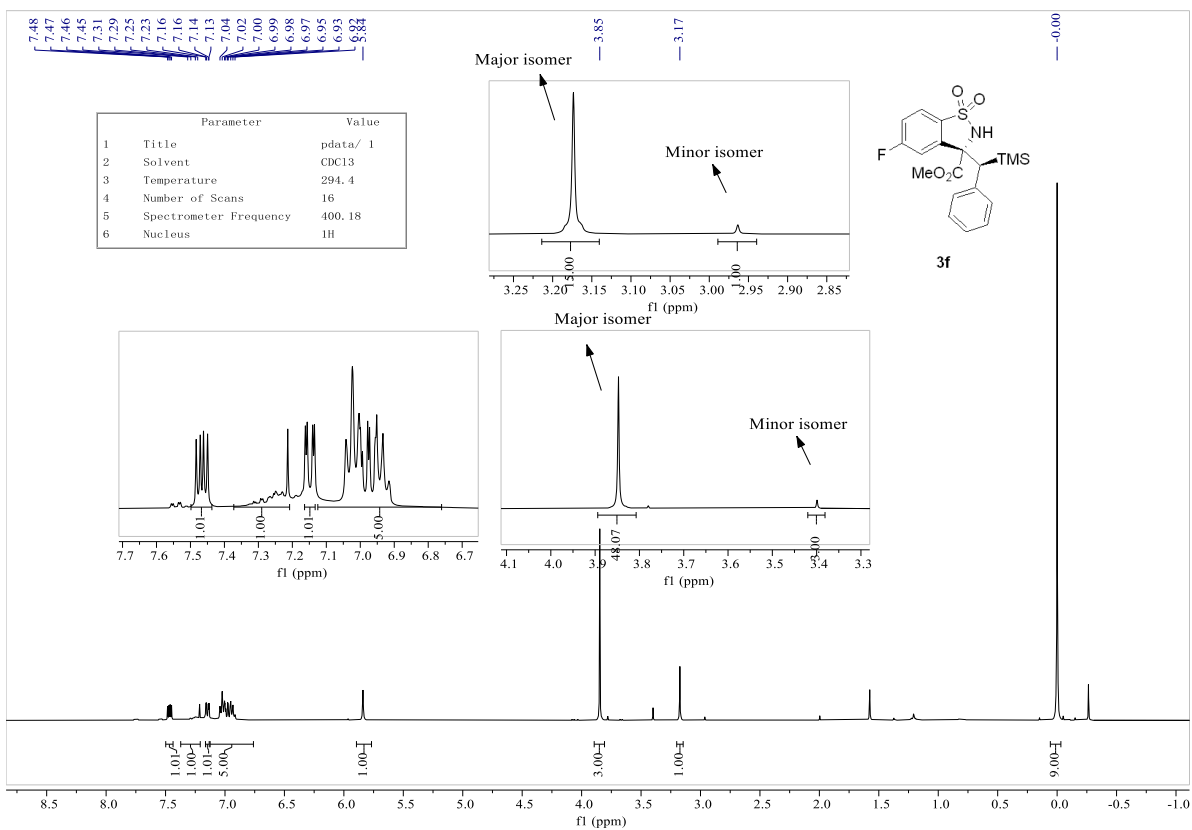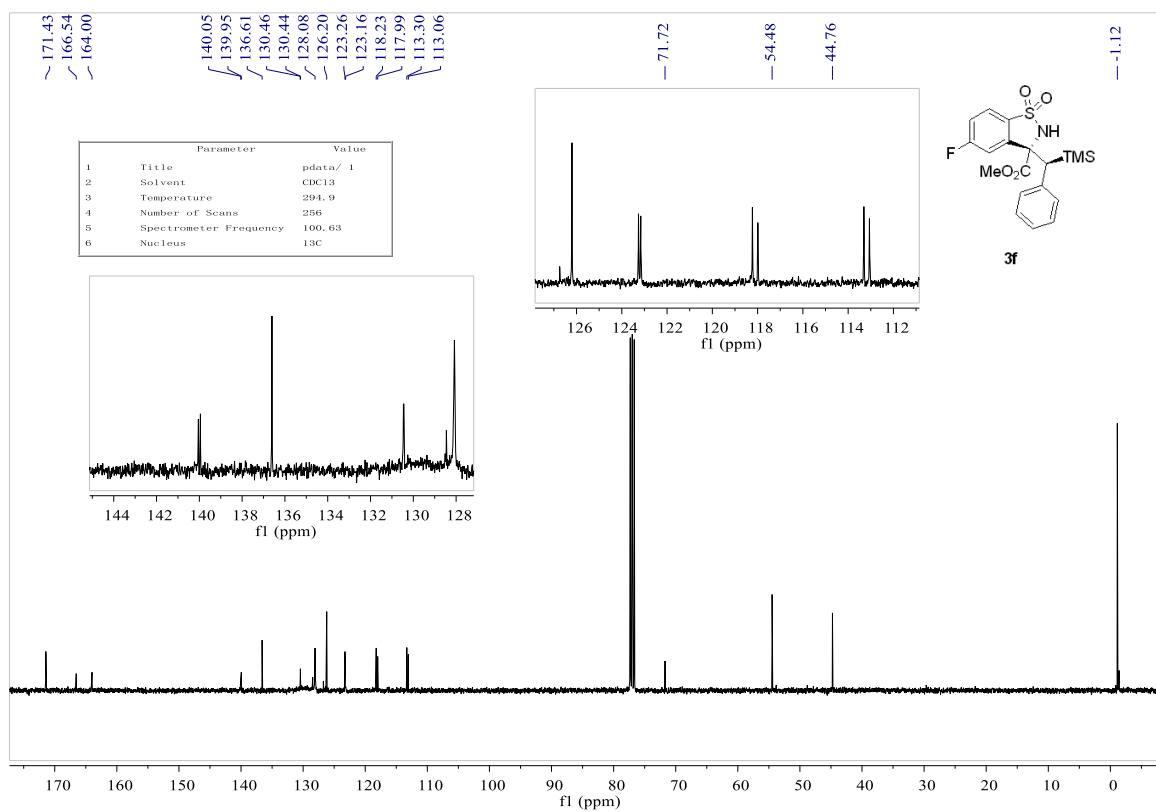

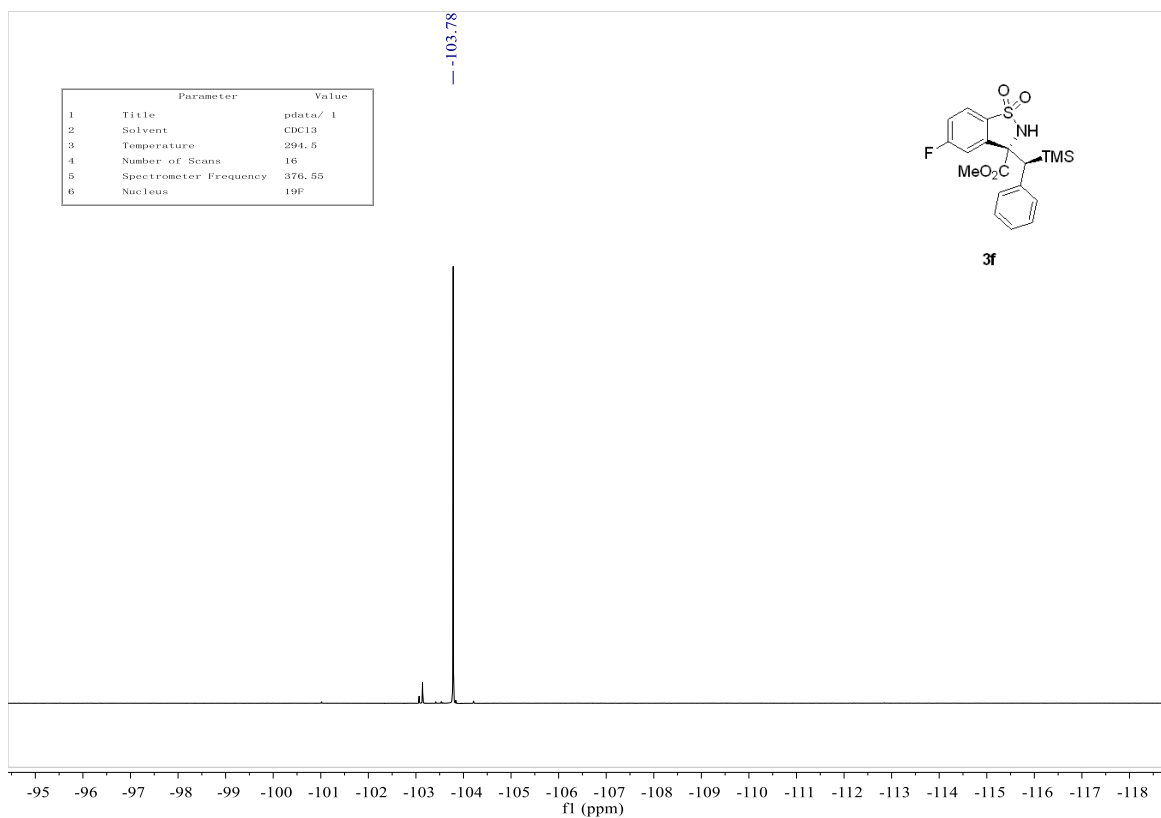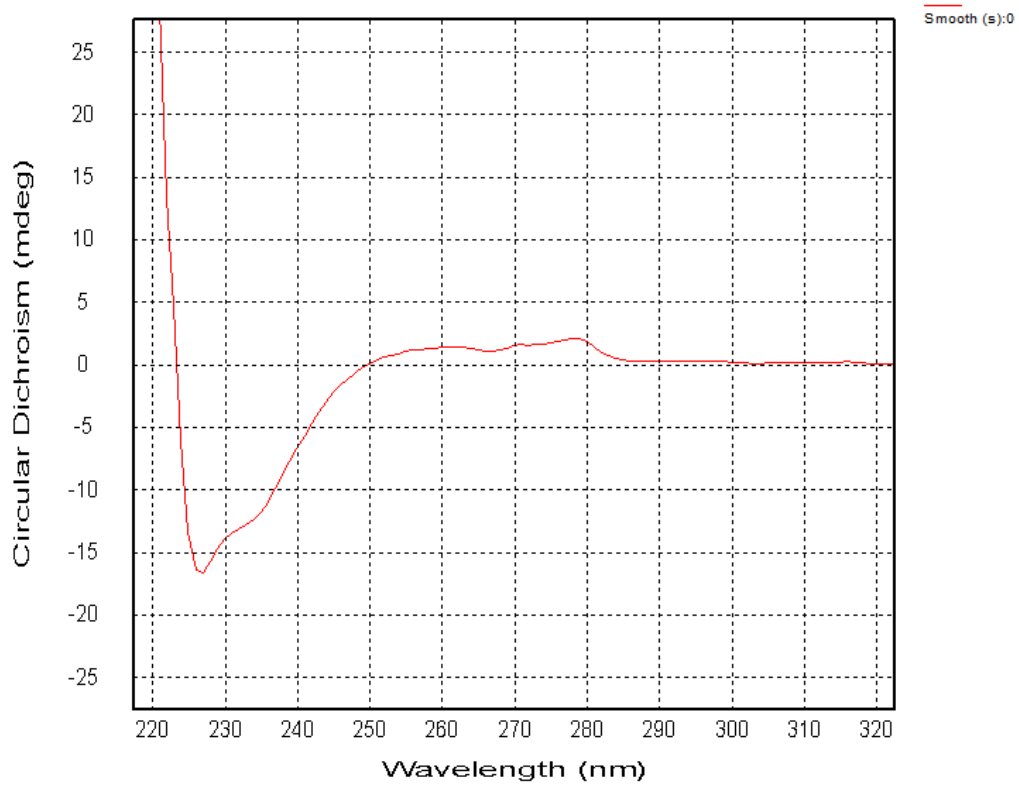



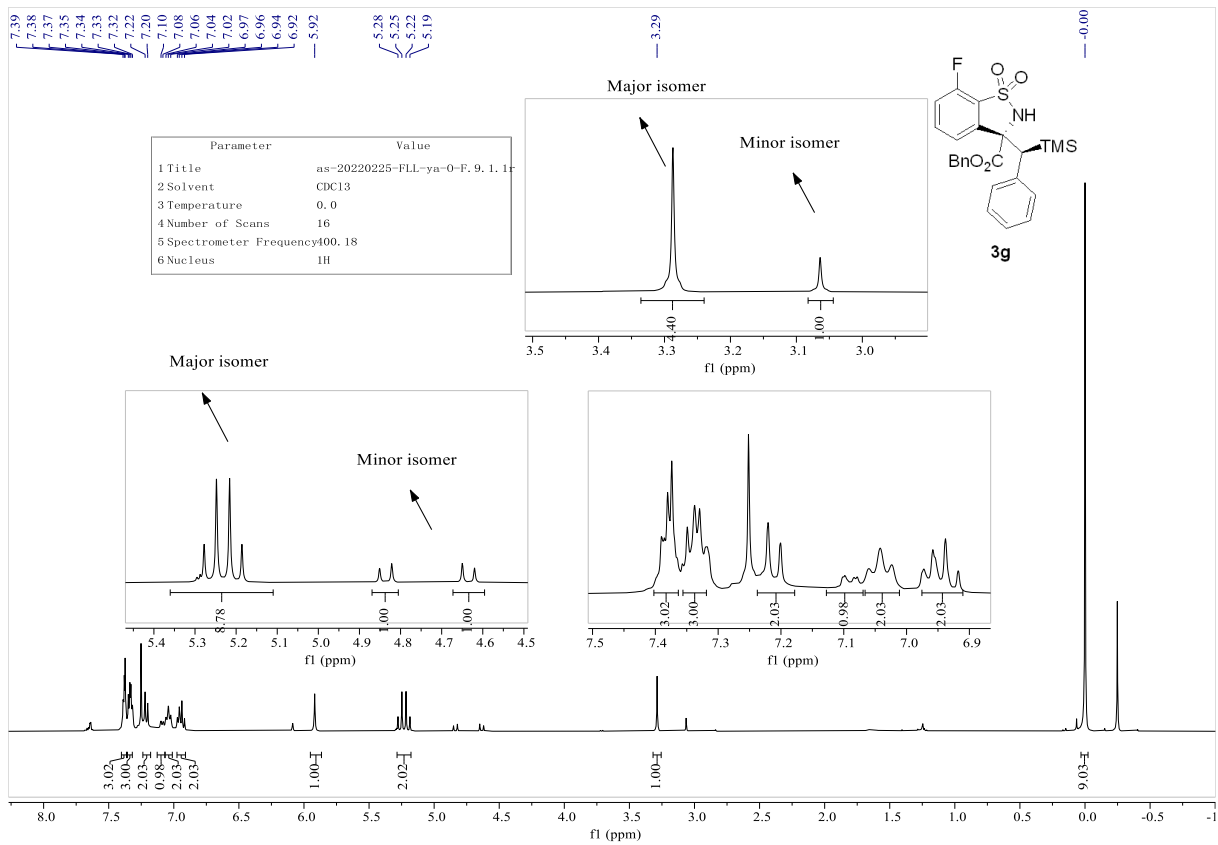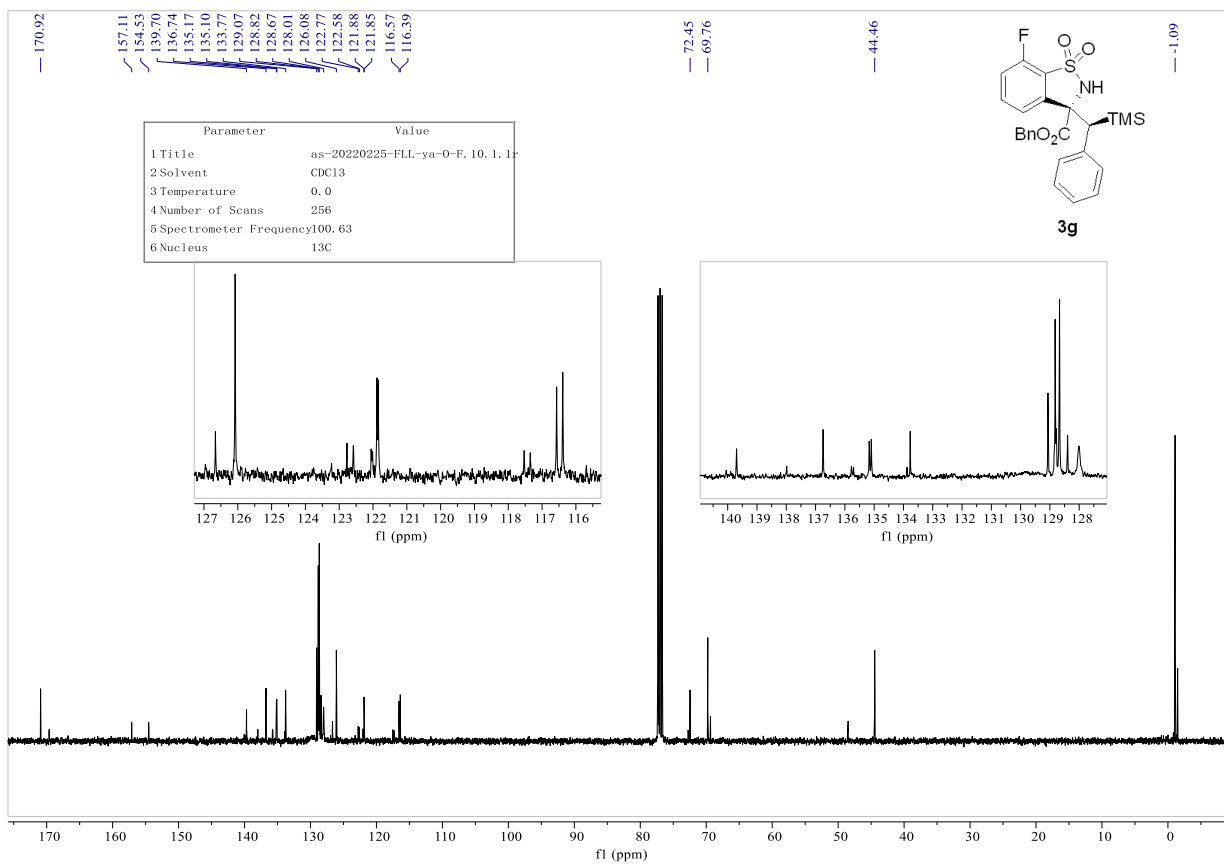

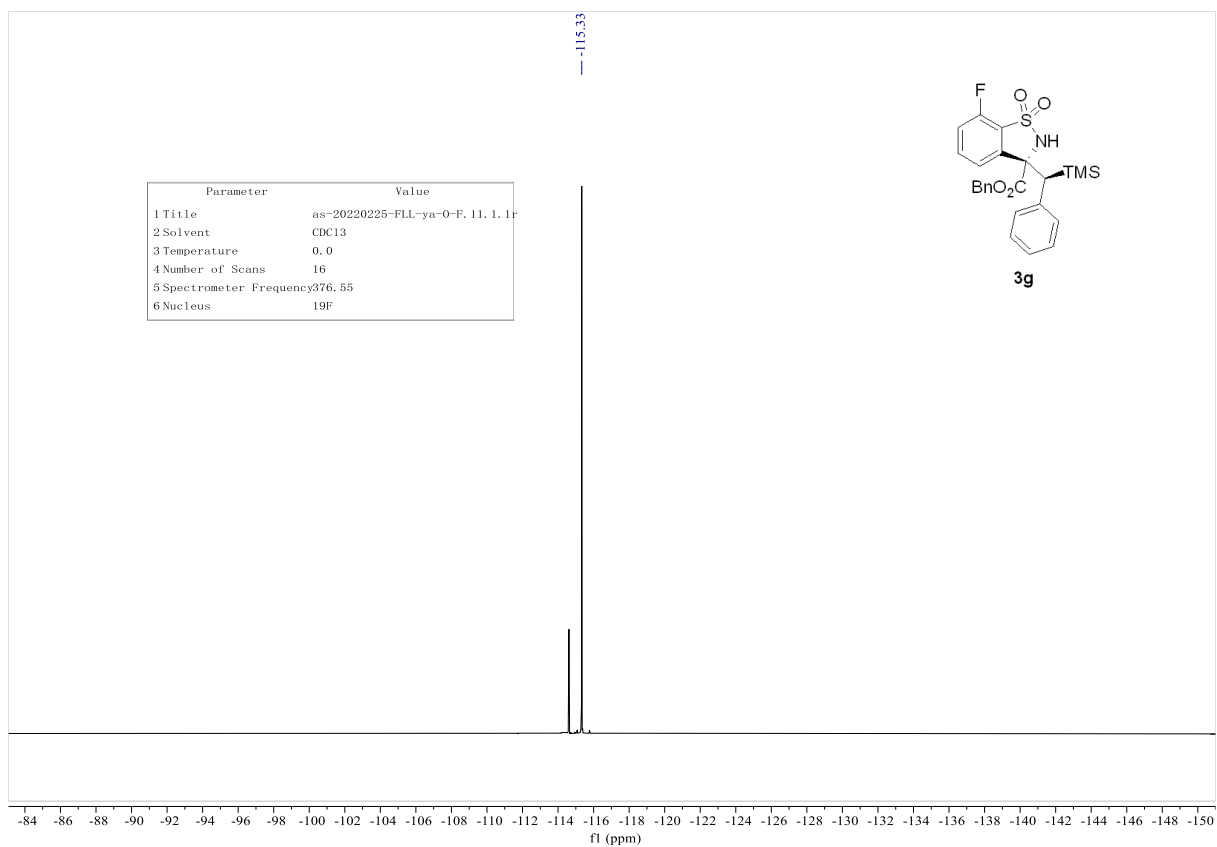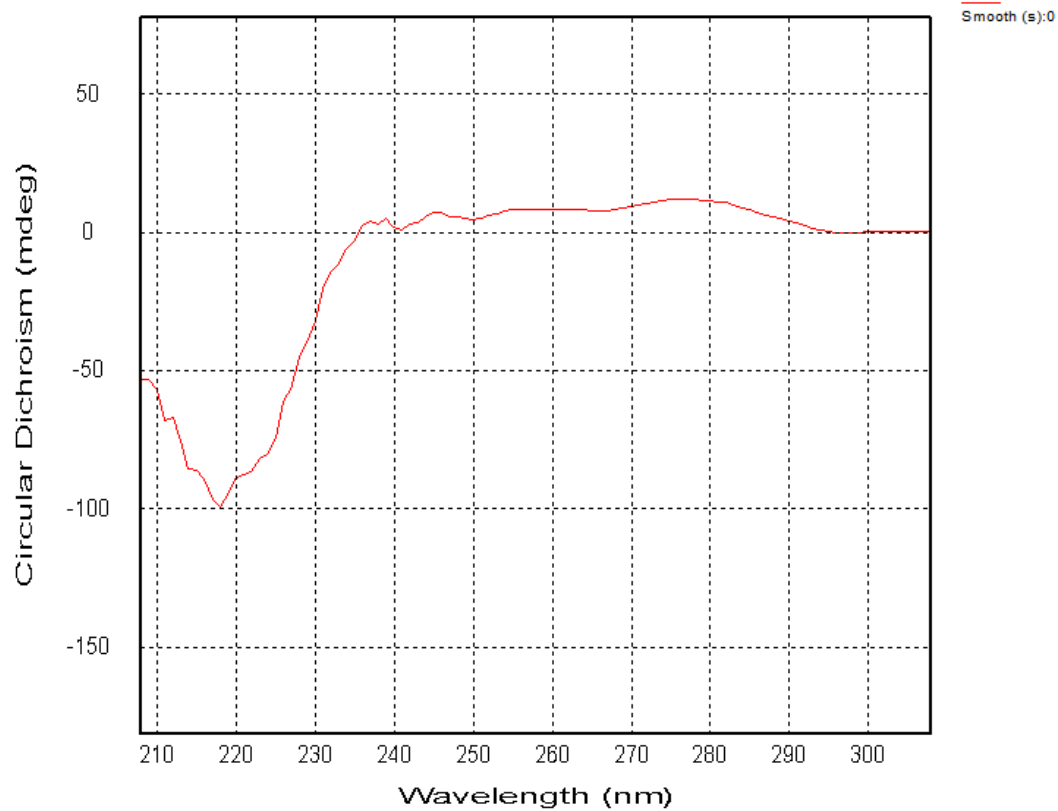

**3h**

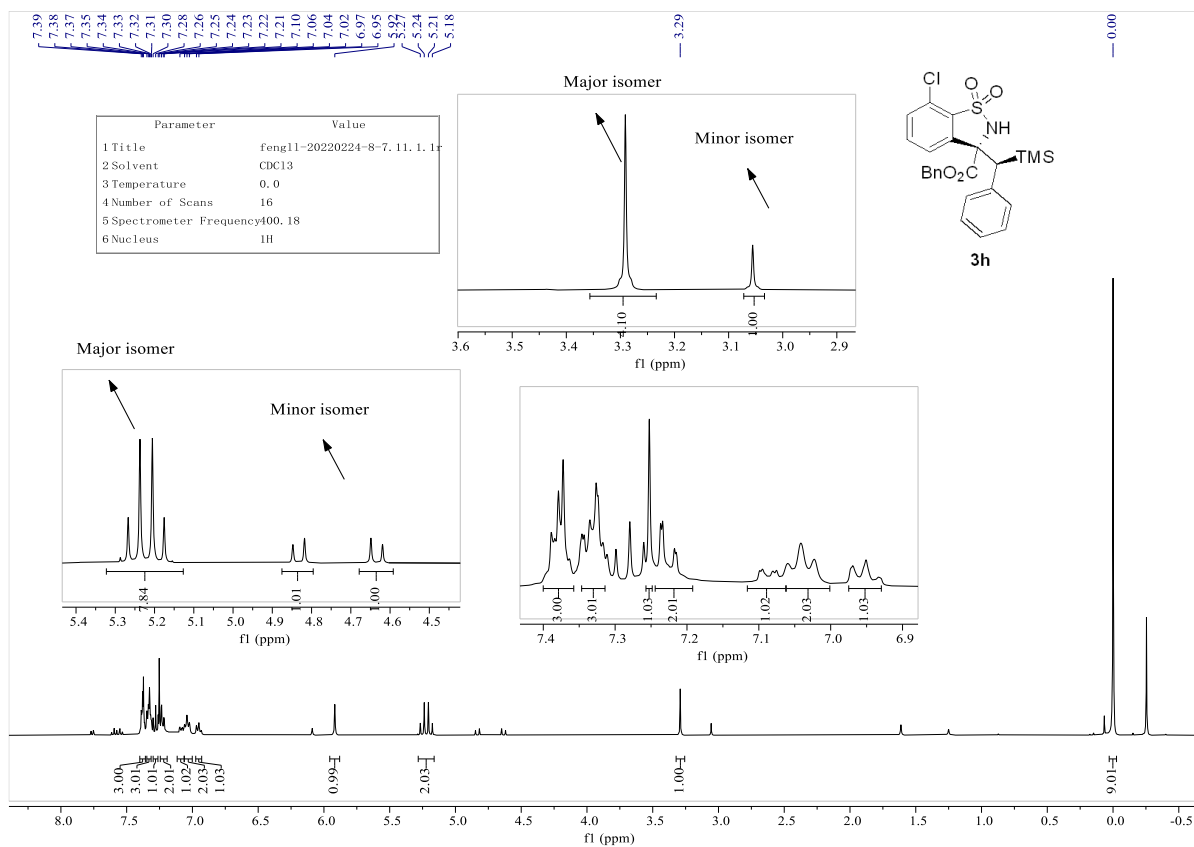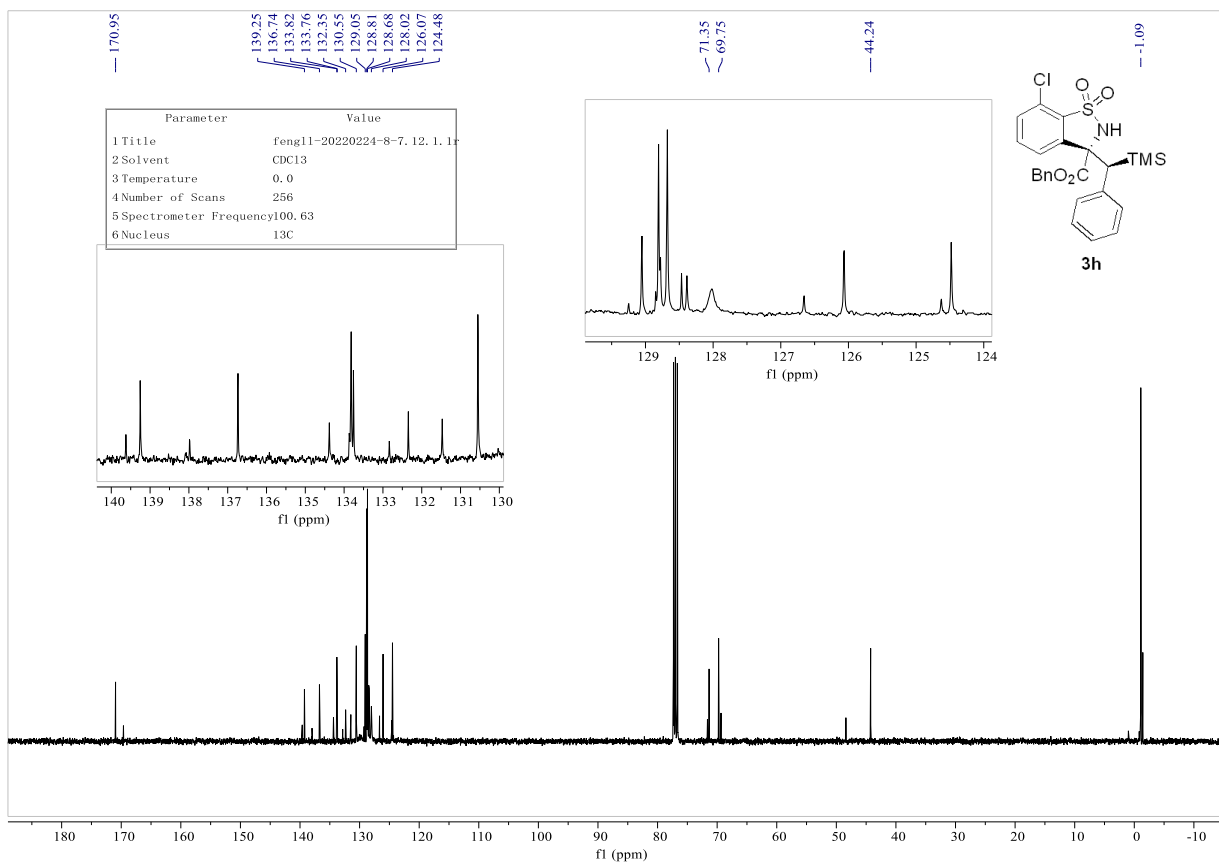

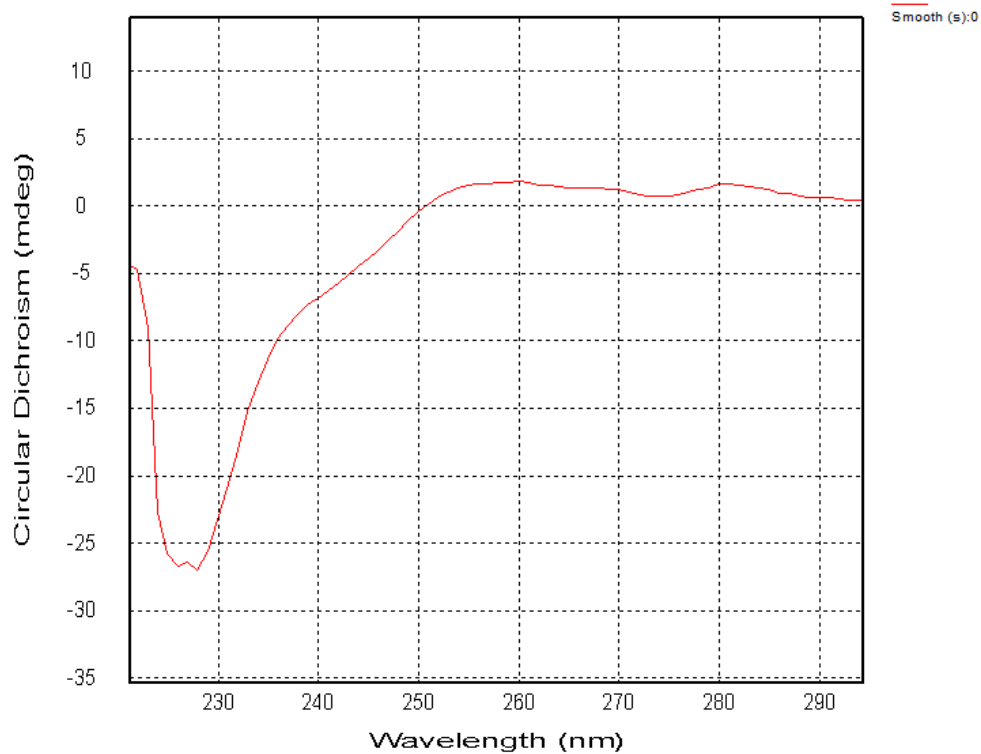

**3i**

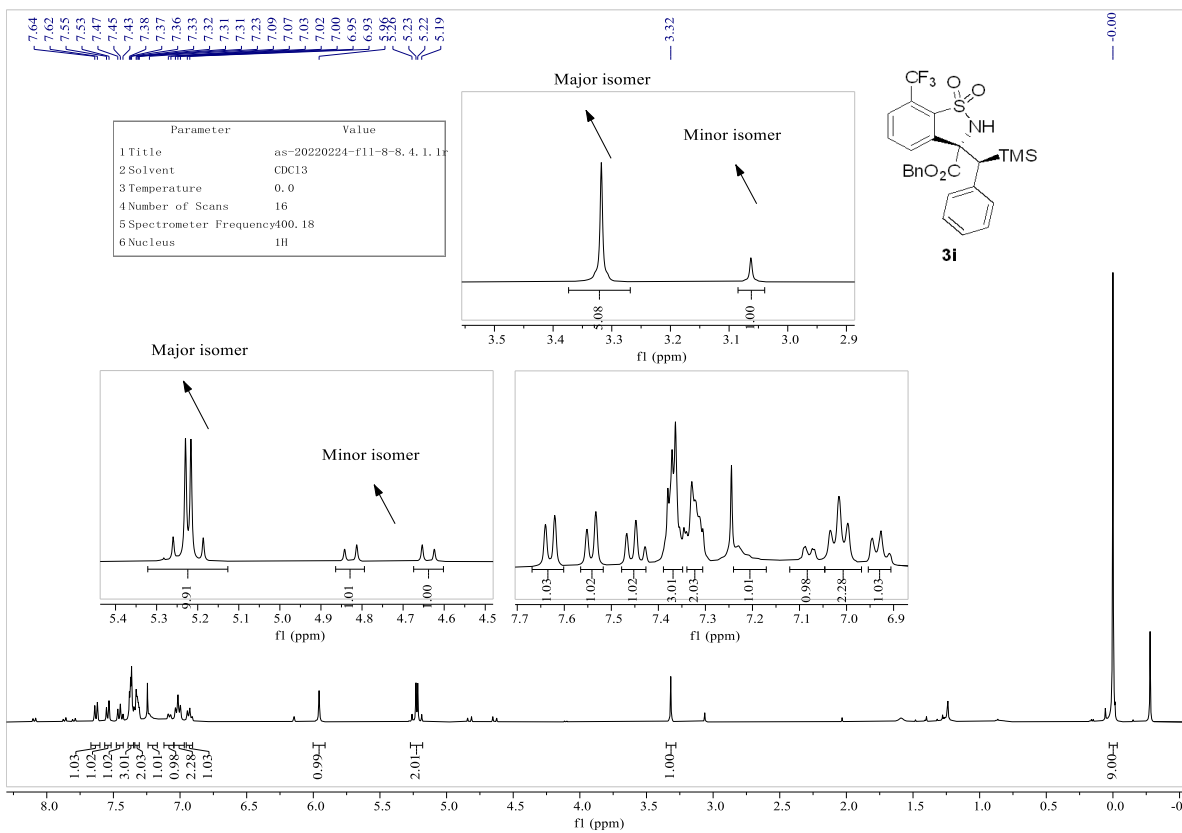

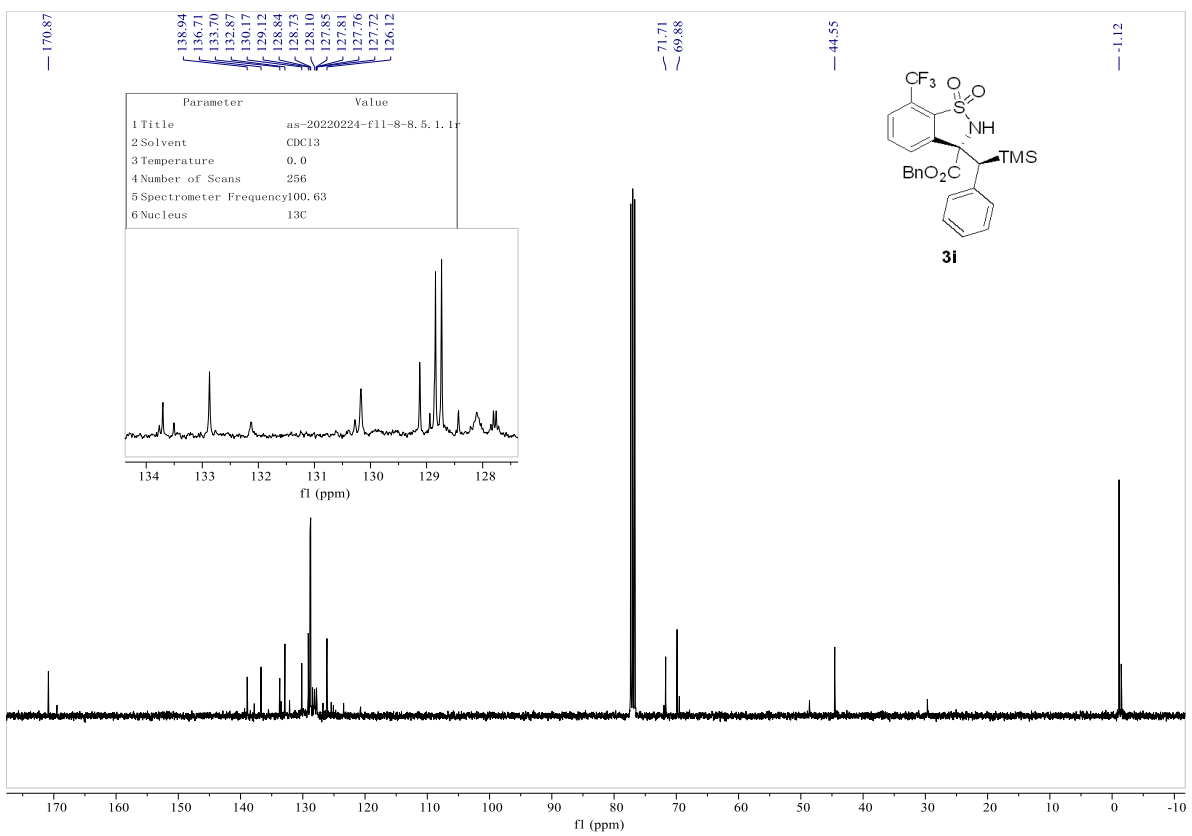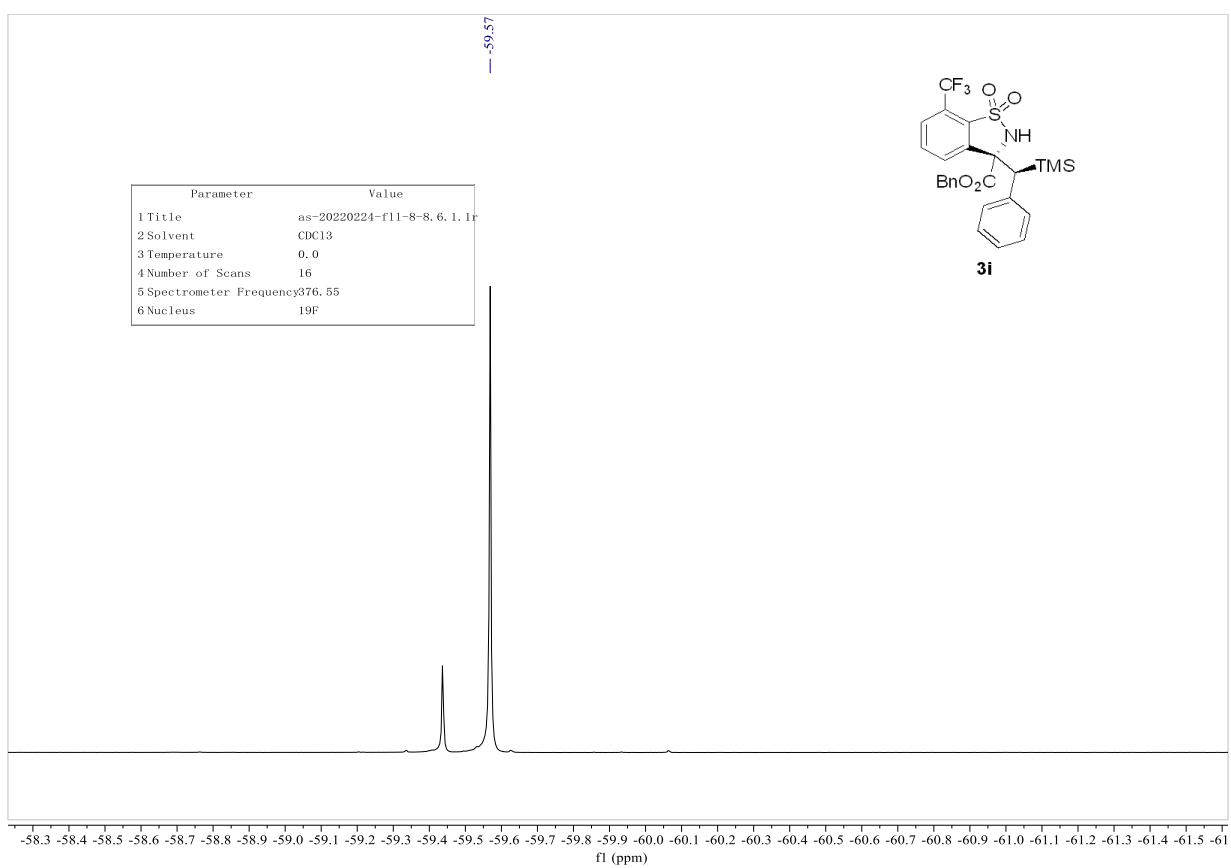

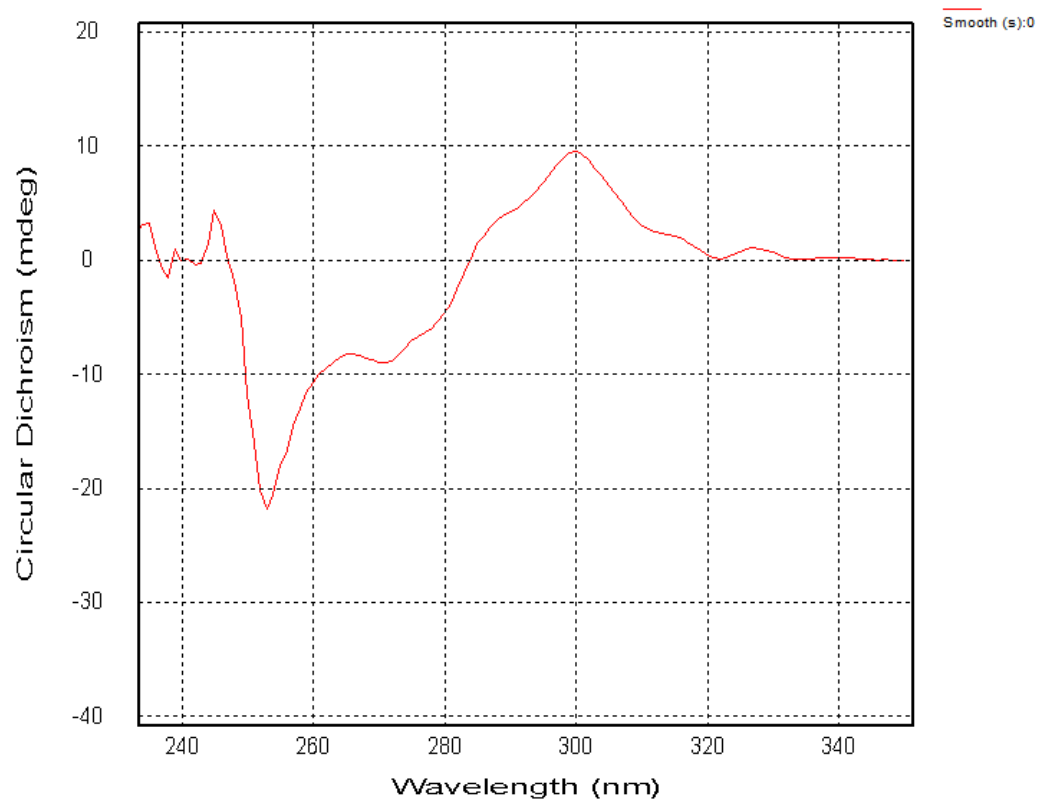

3j

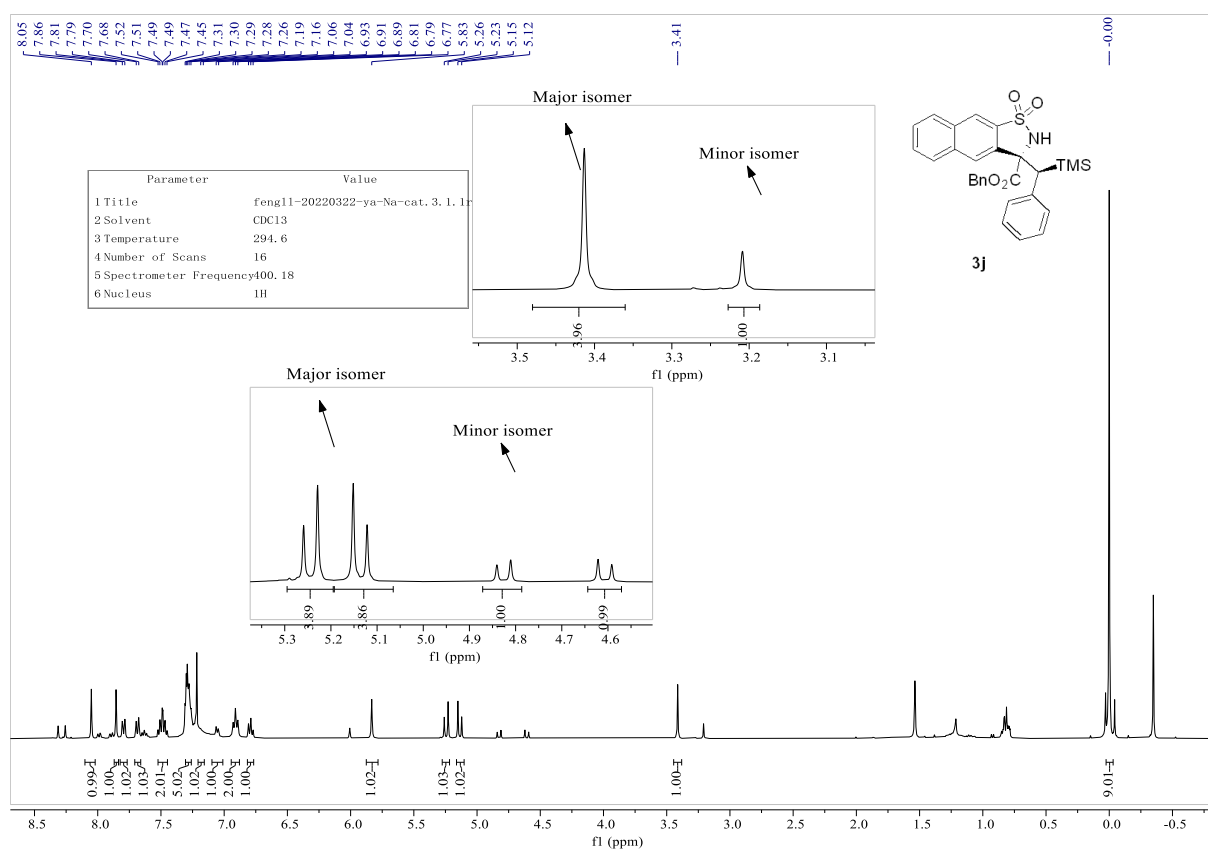

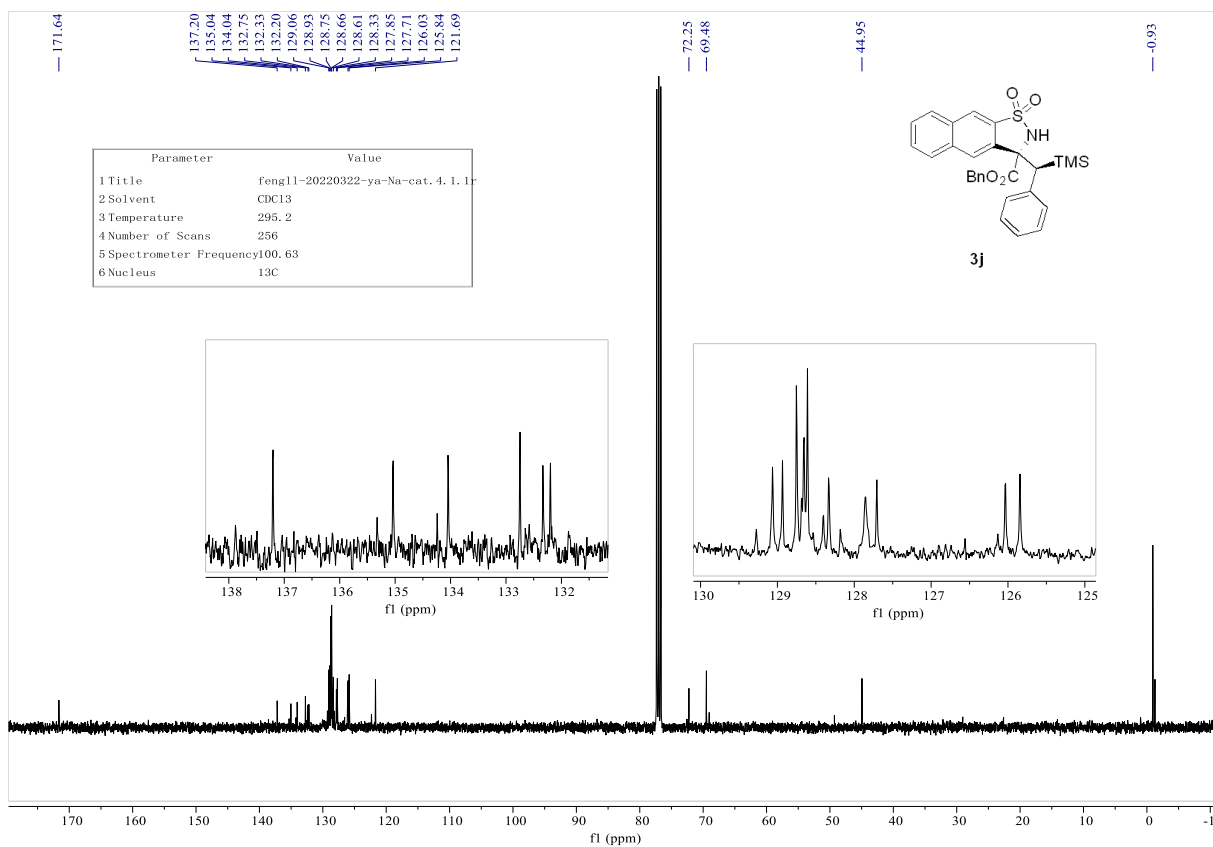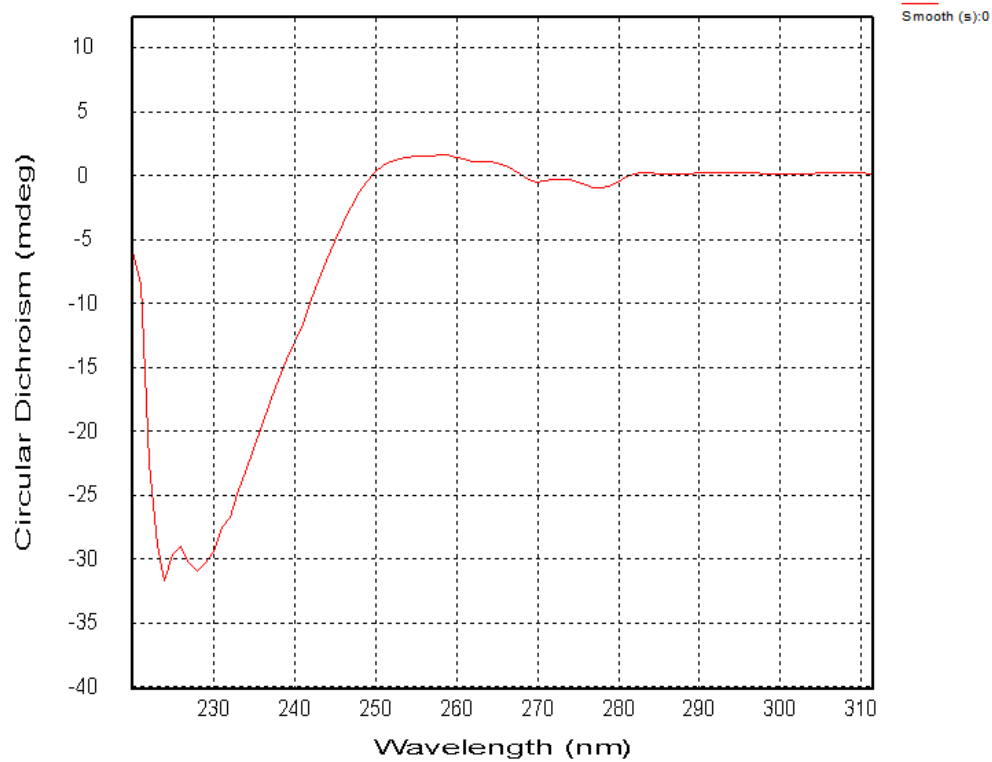

**3k**

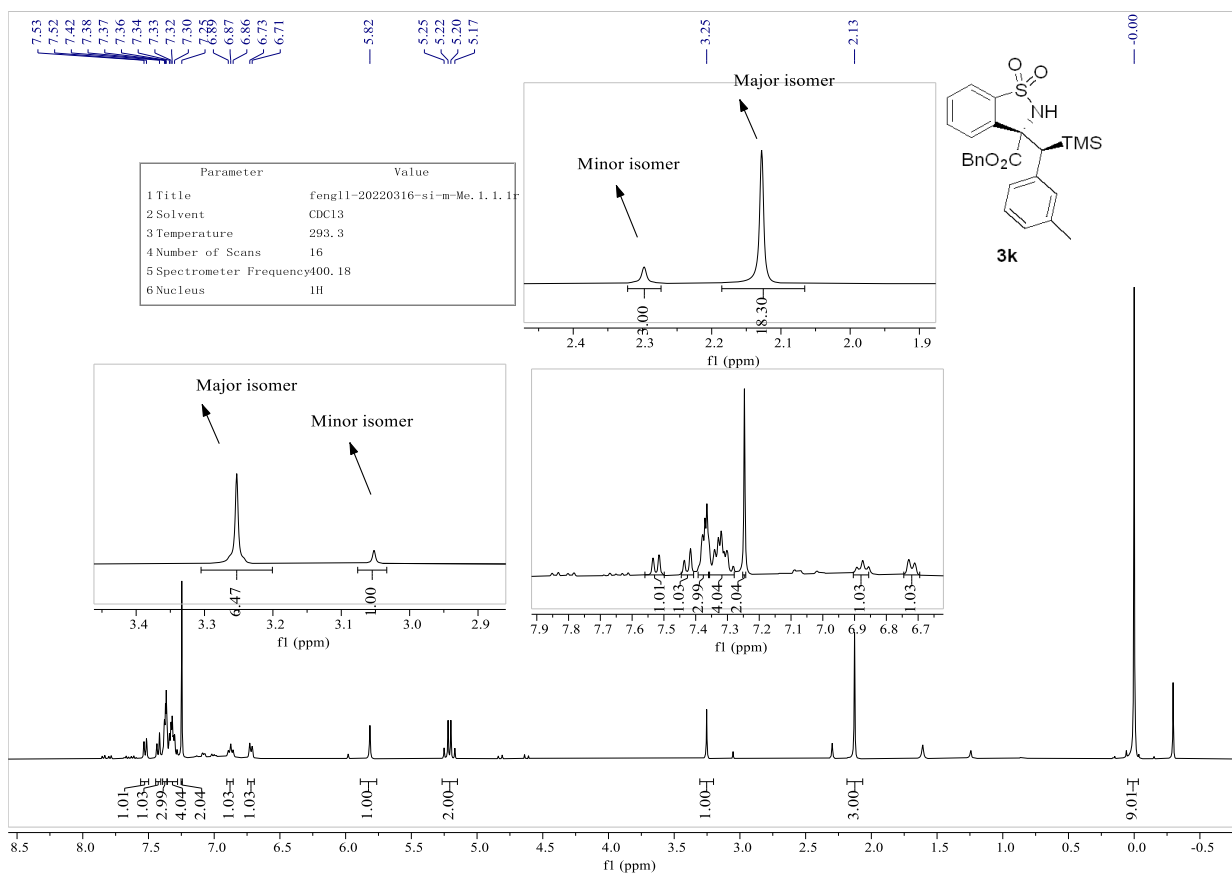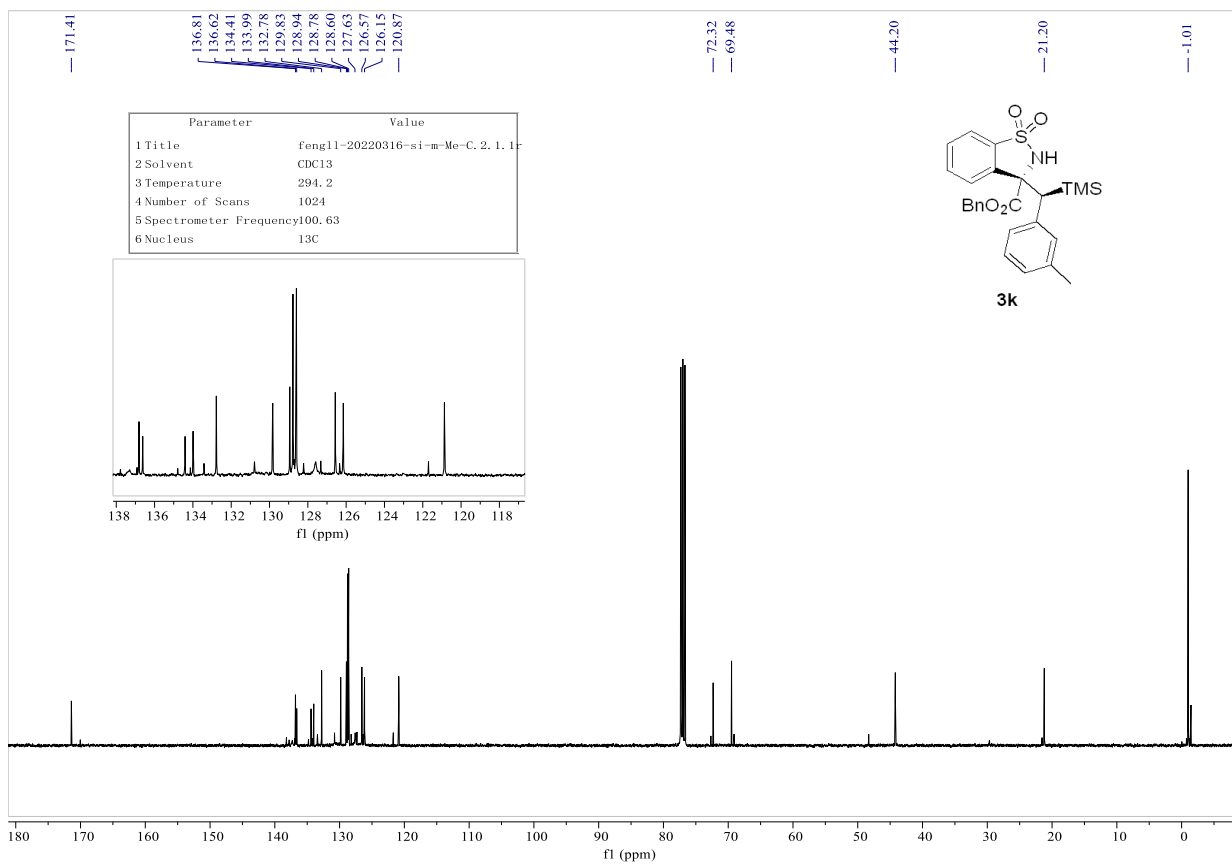



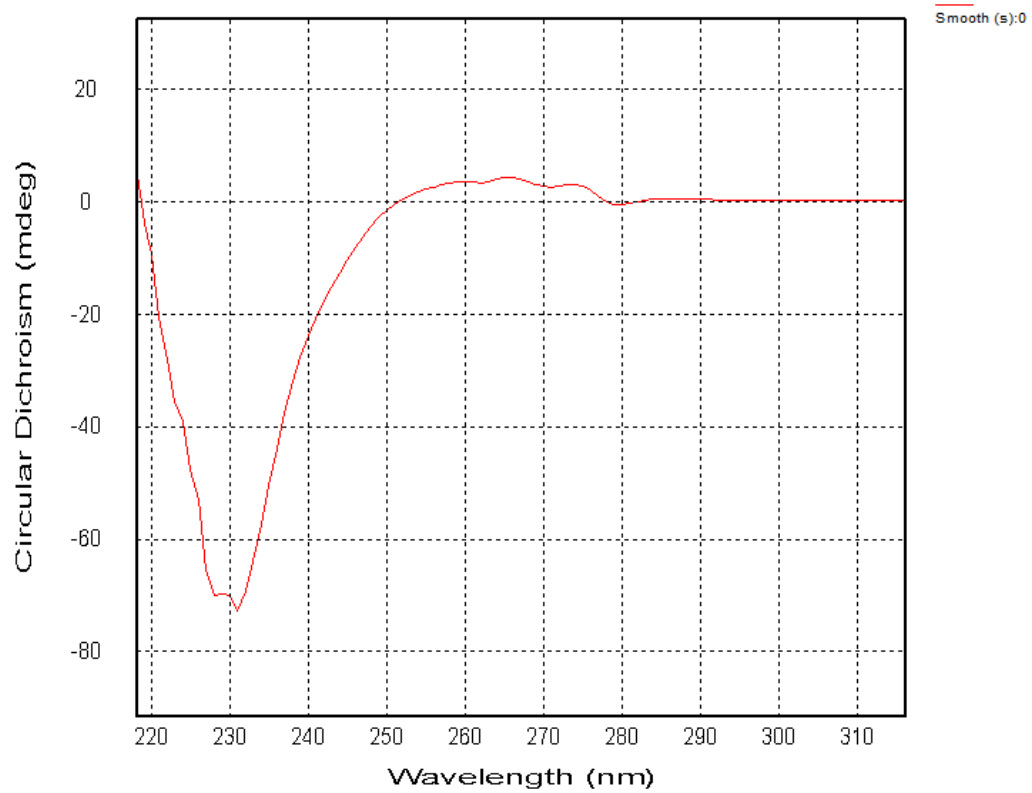

3I

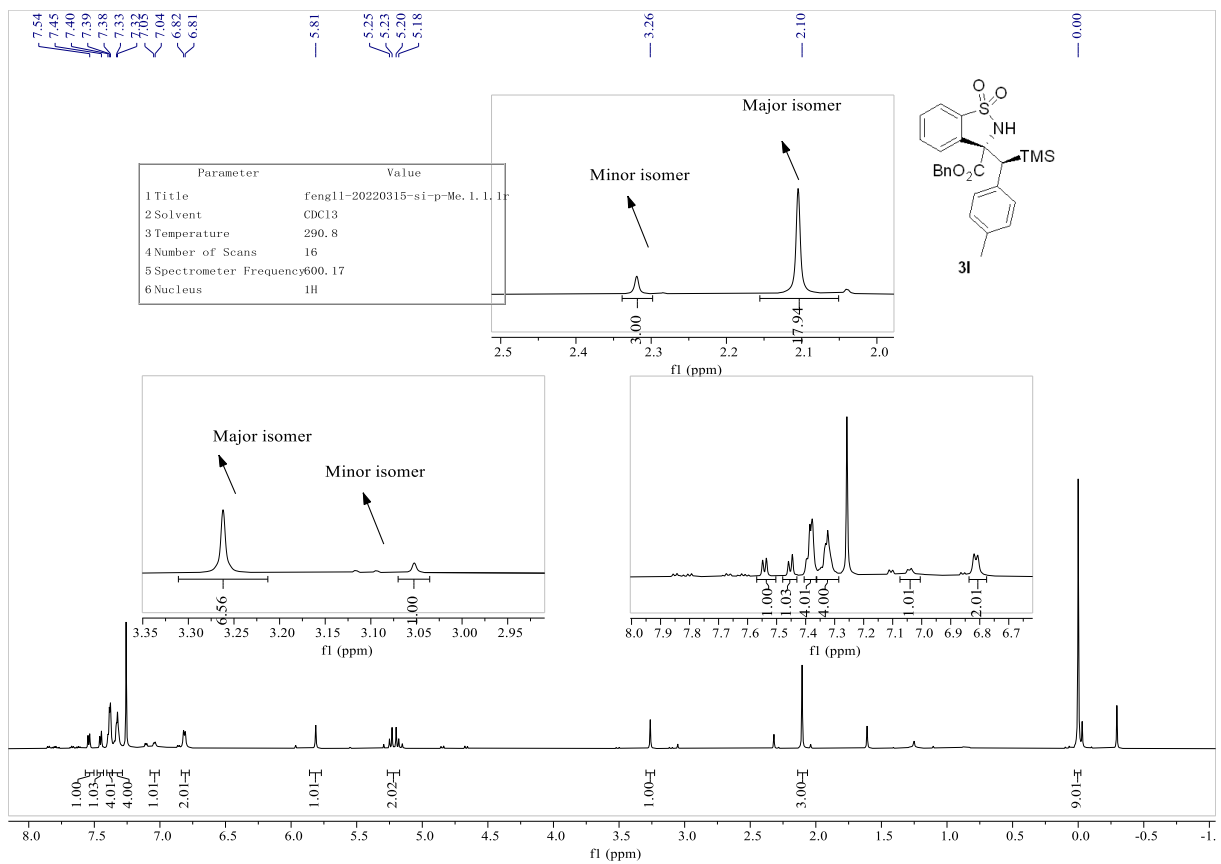

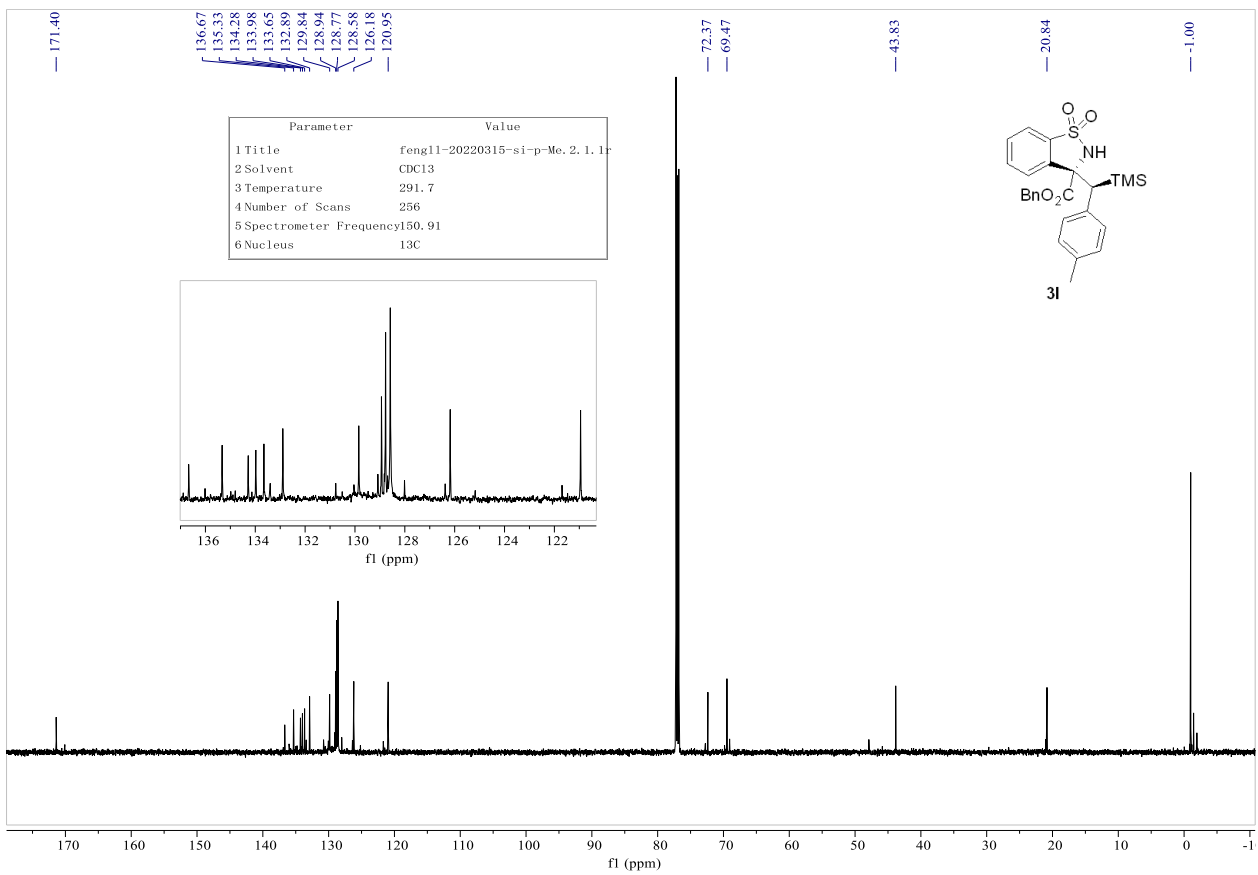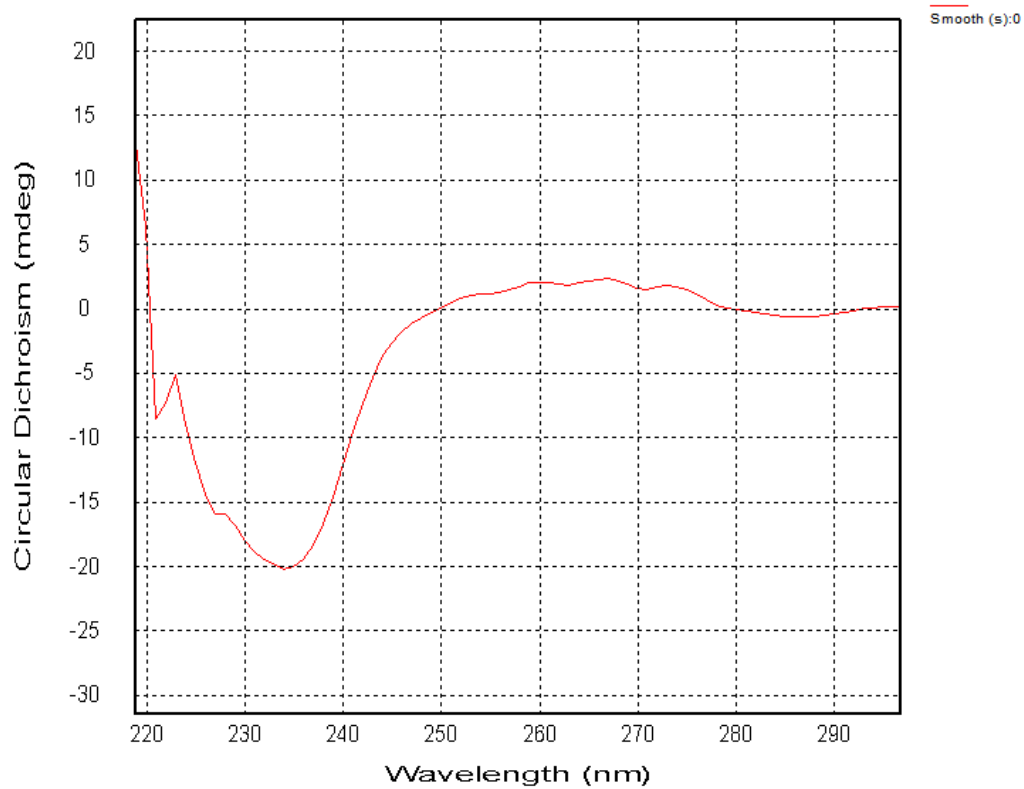

**3m**

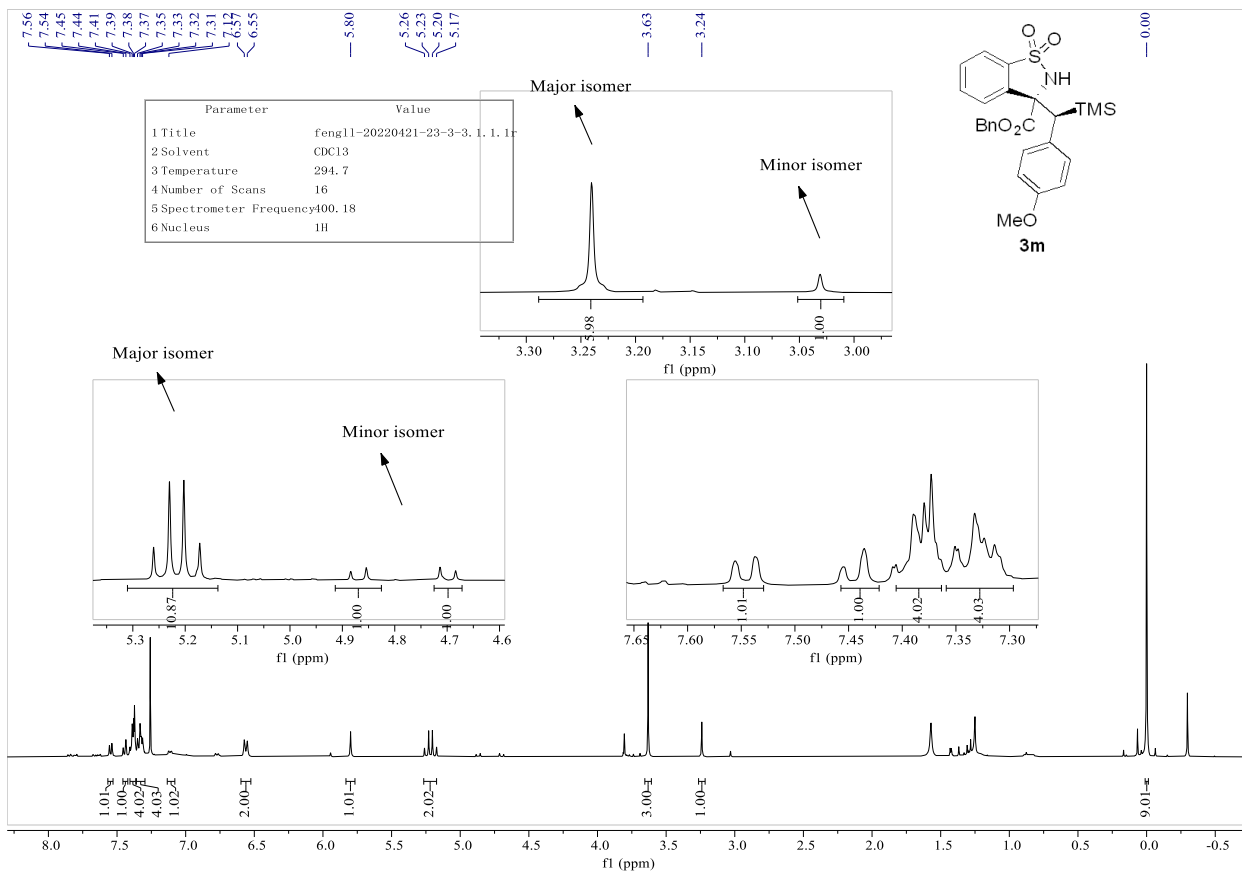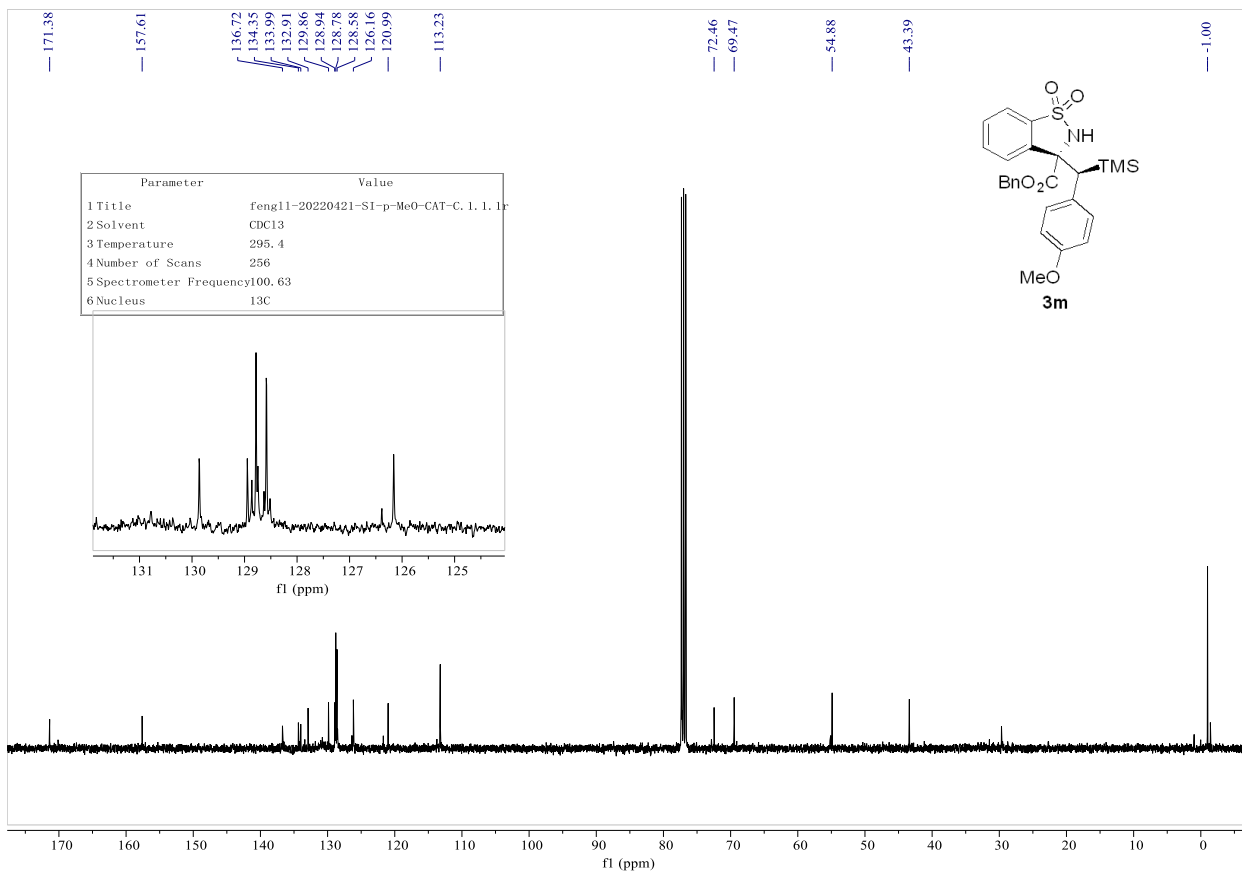

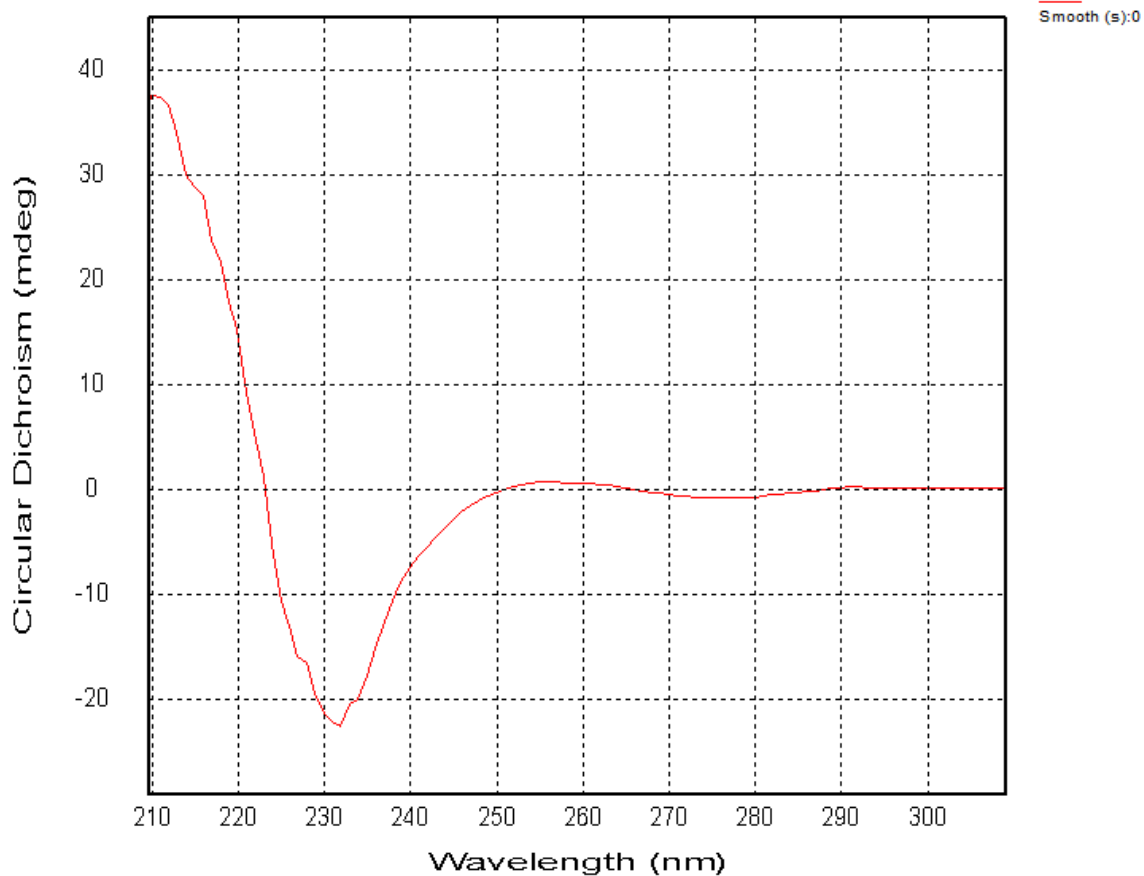

### 3n

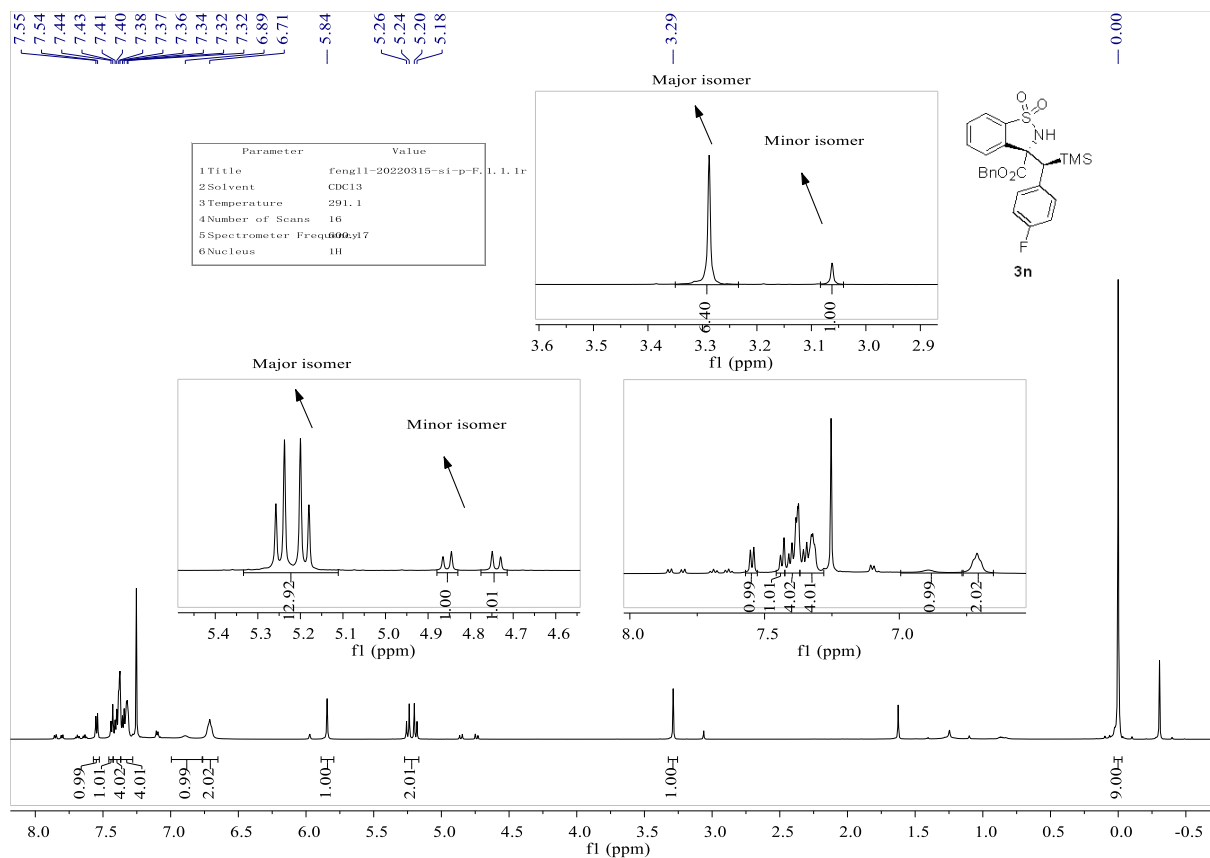

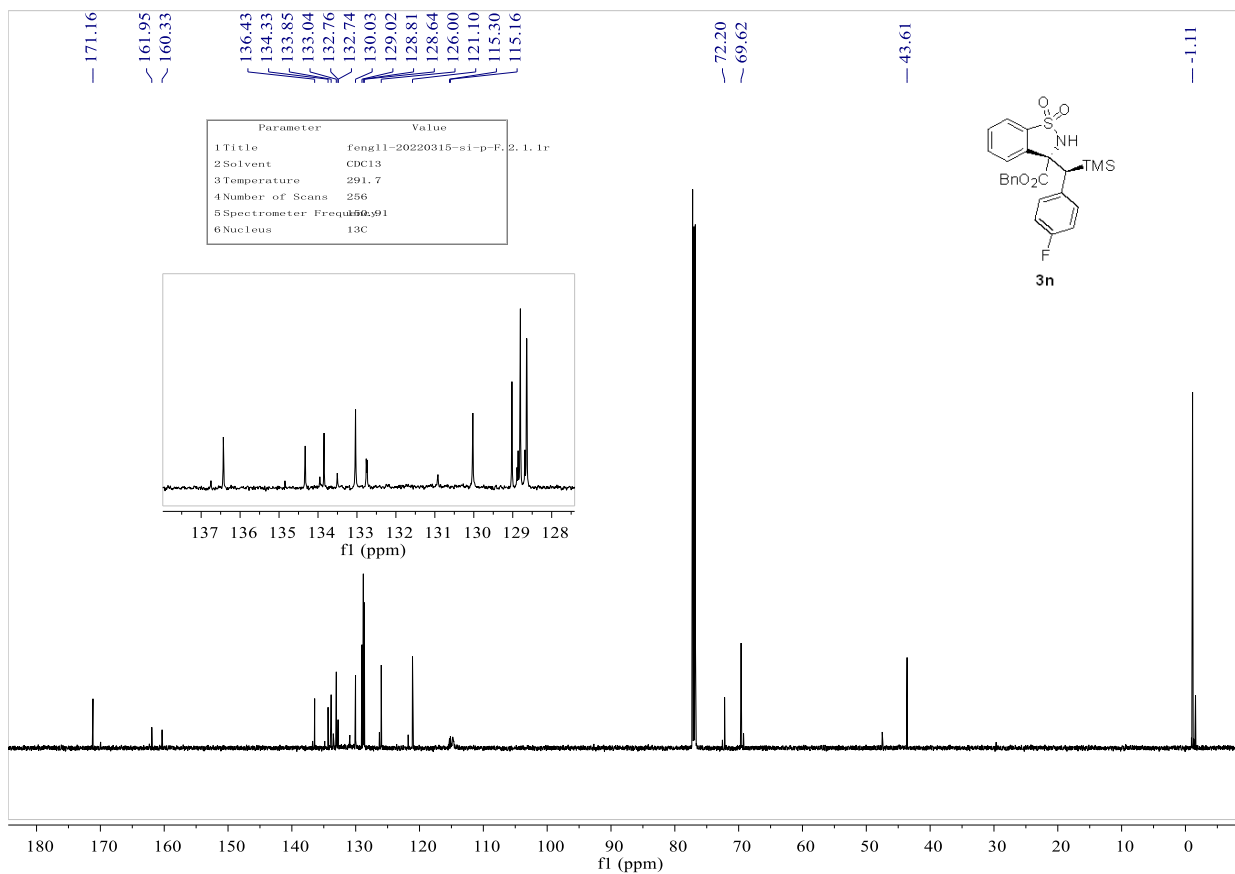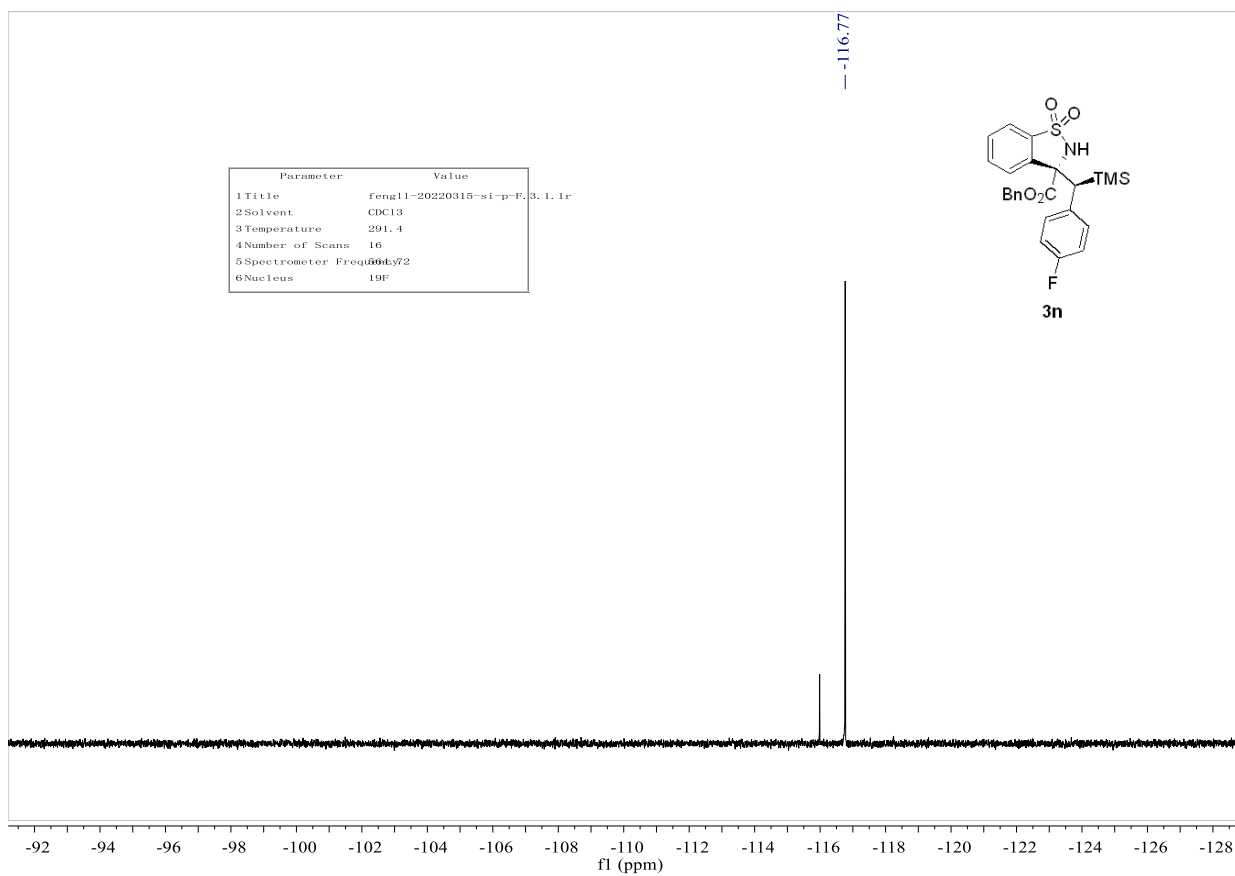

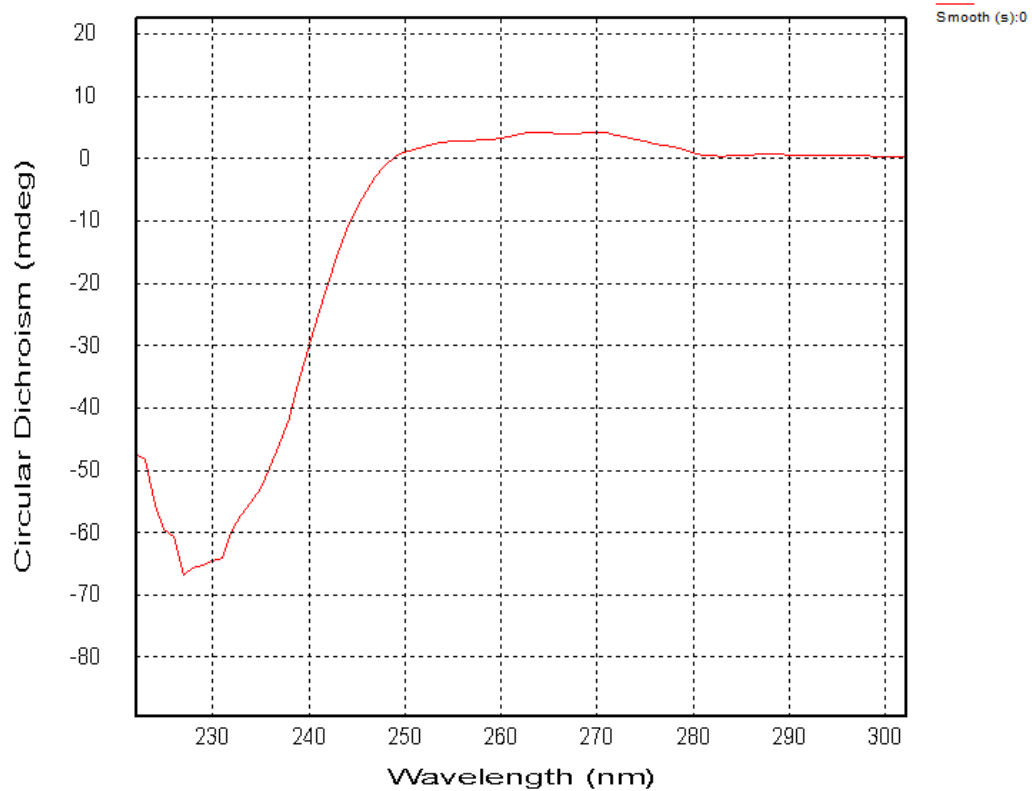

30

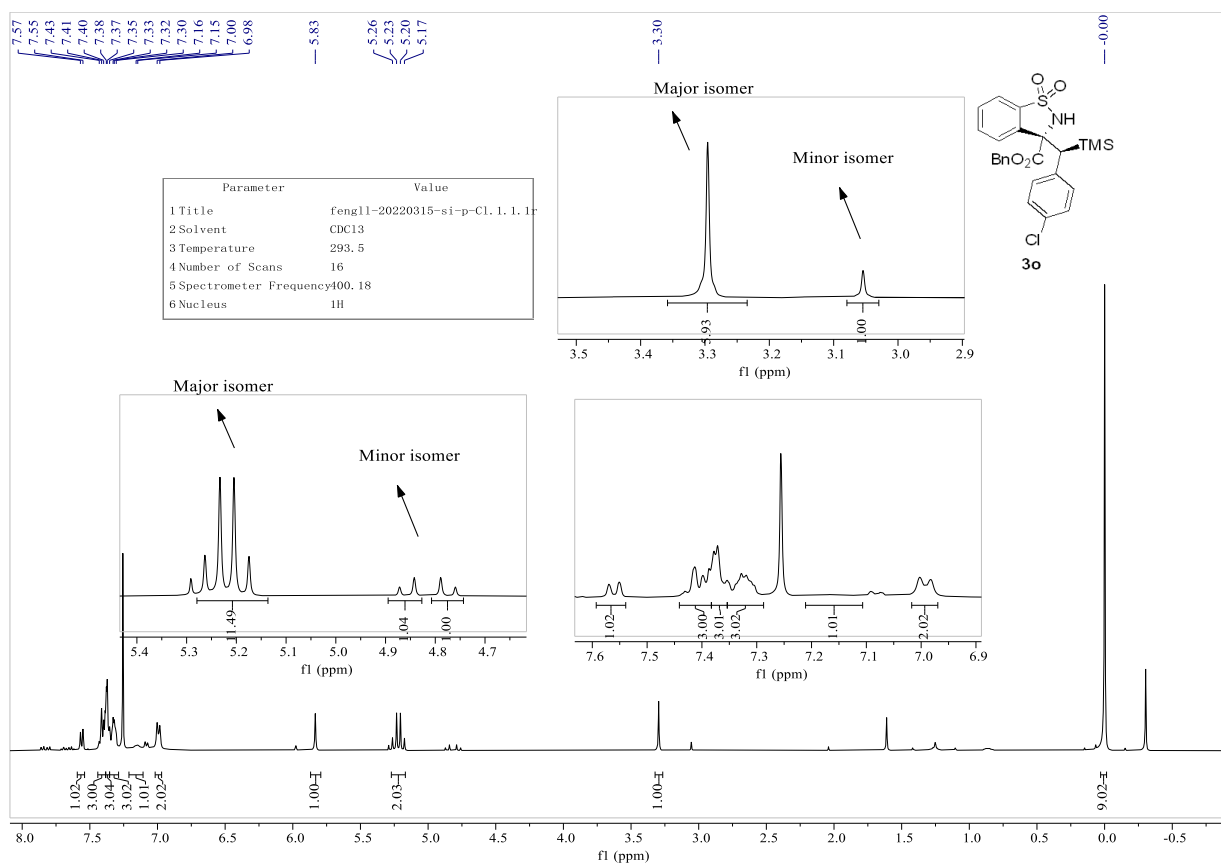

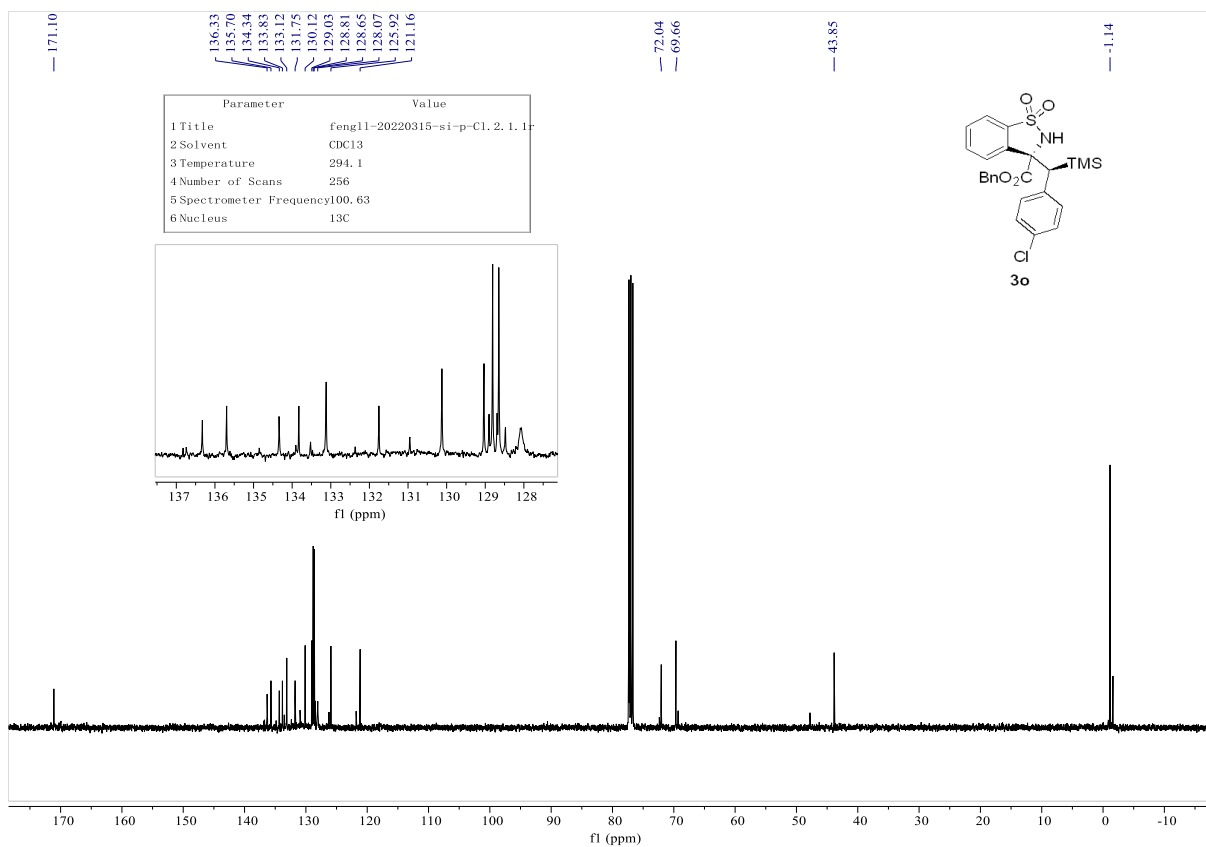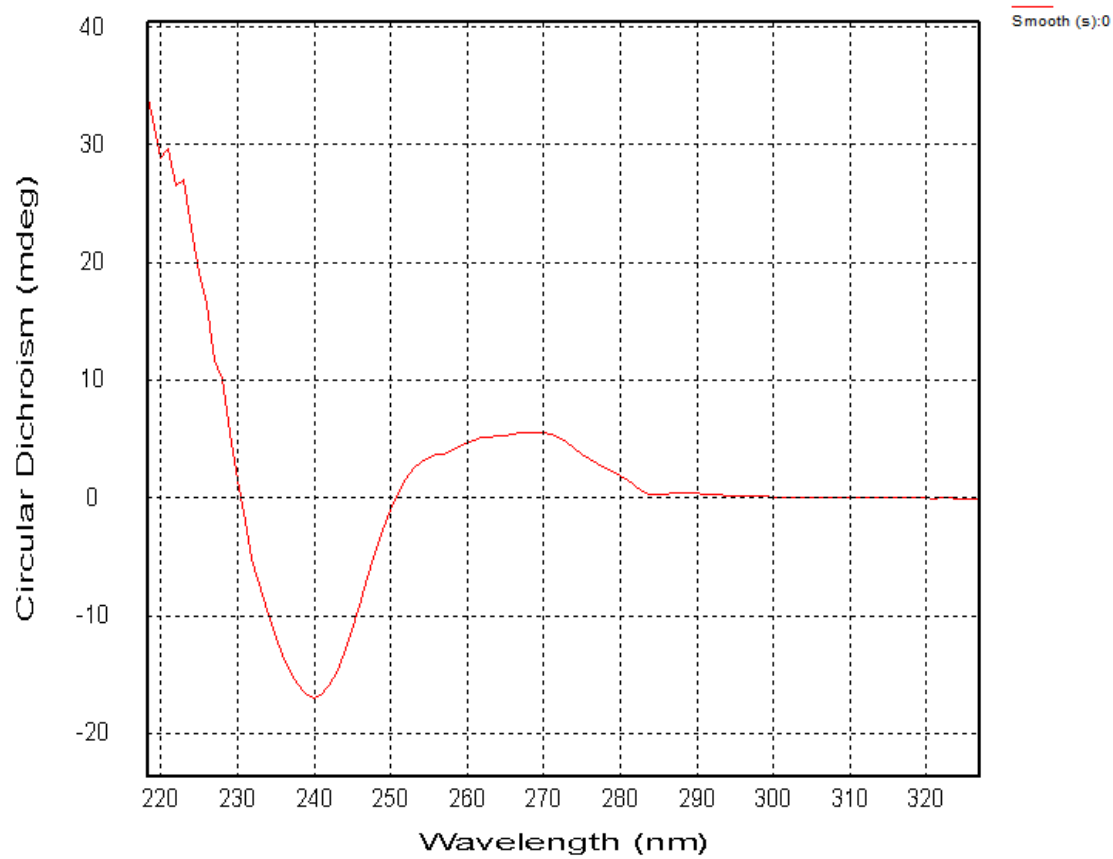

**3p**

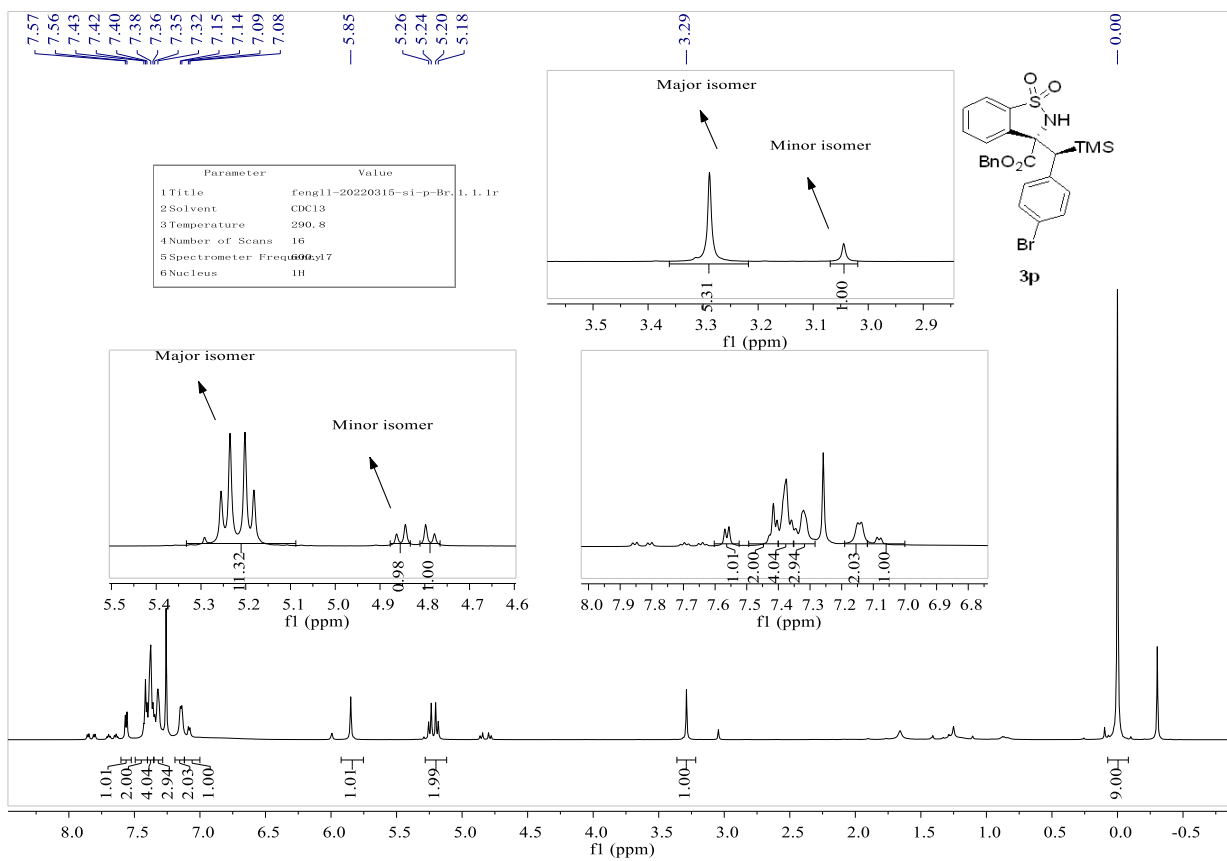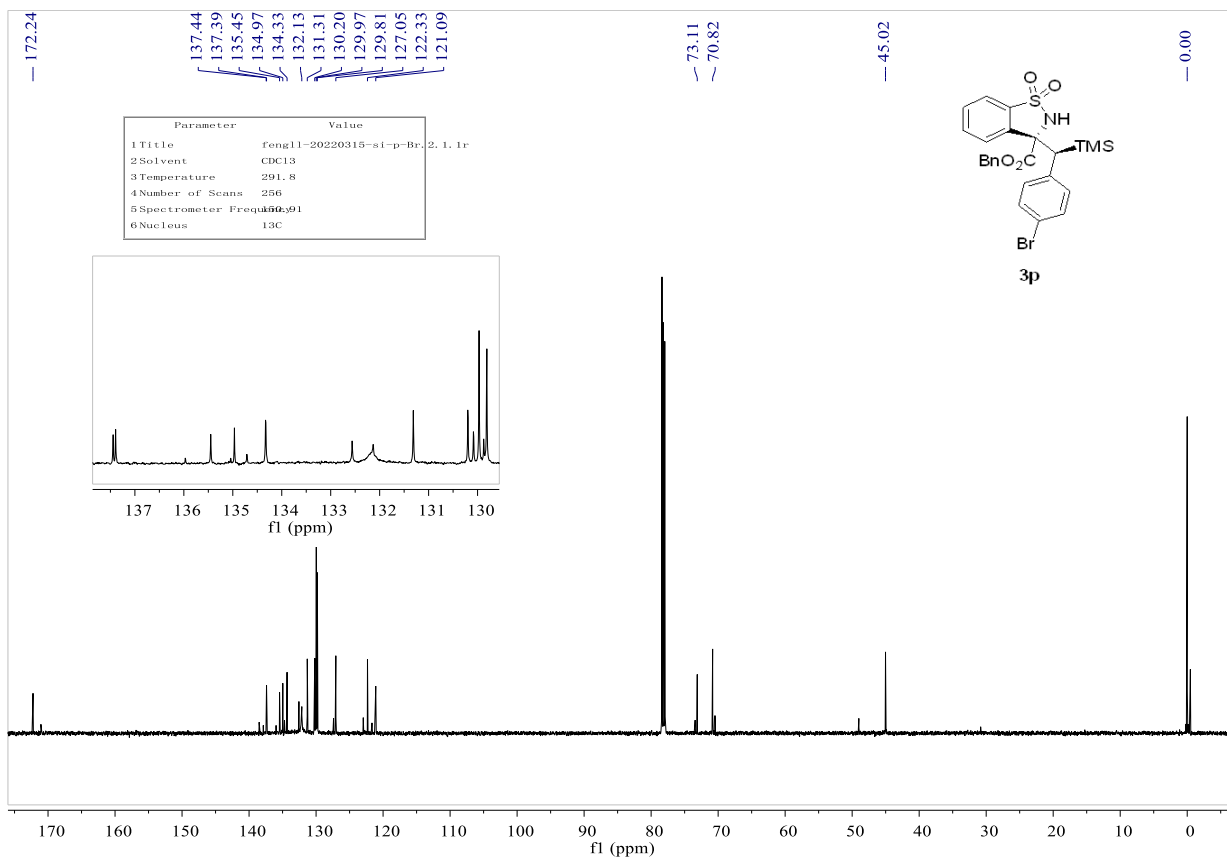



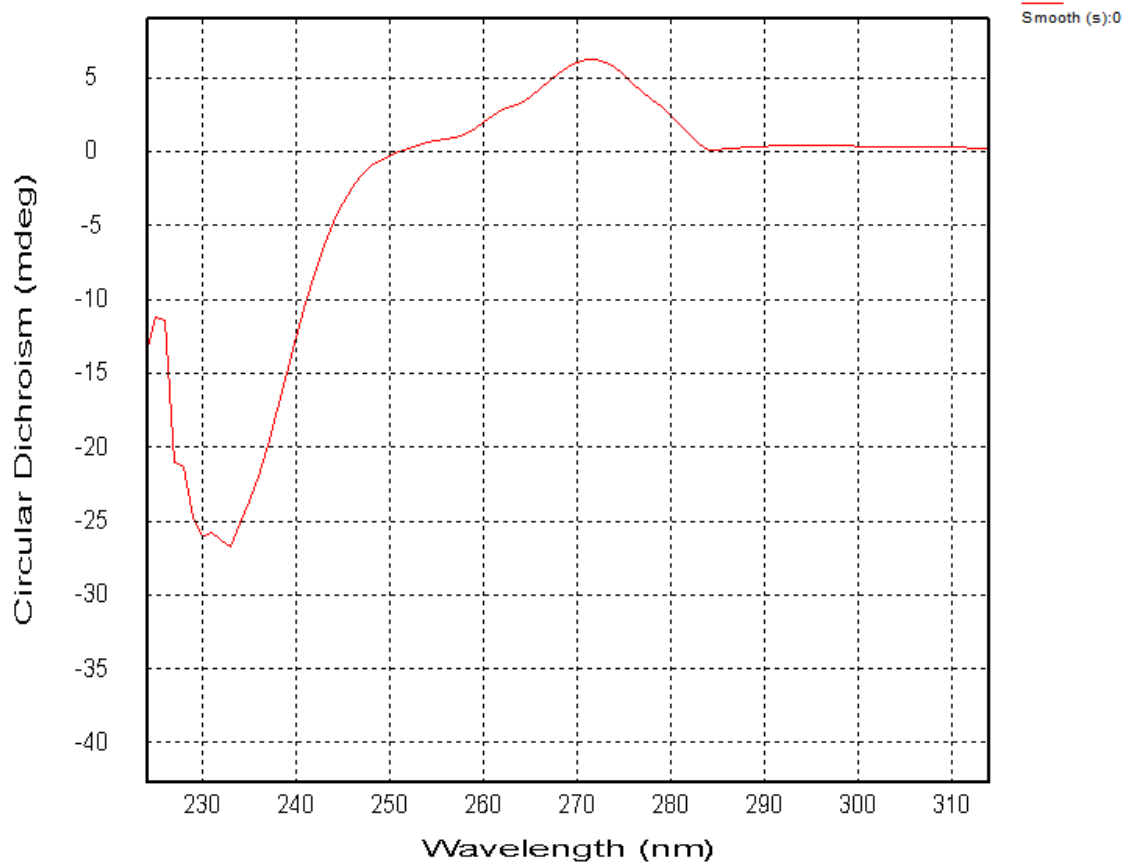

### 3q

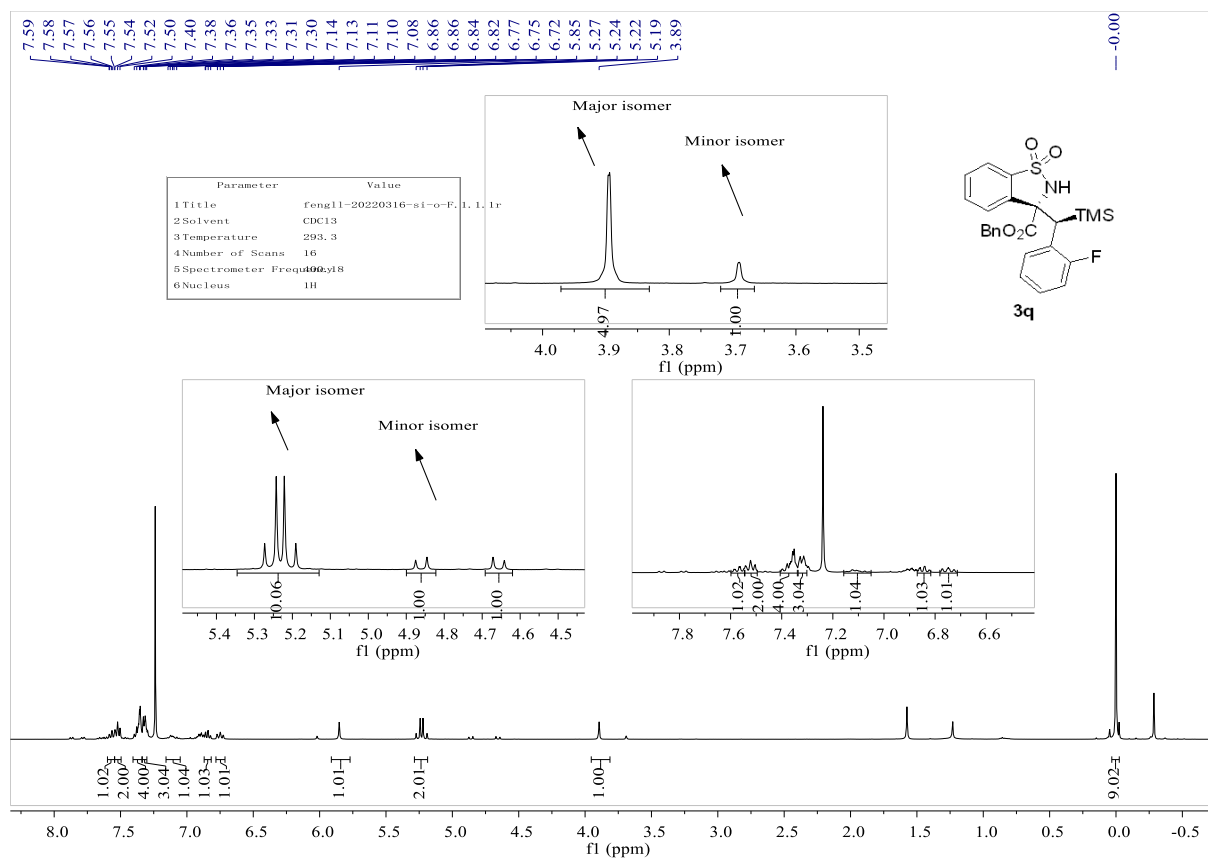

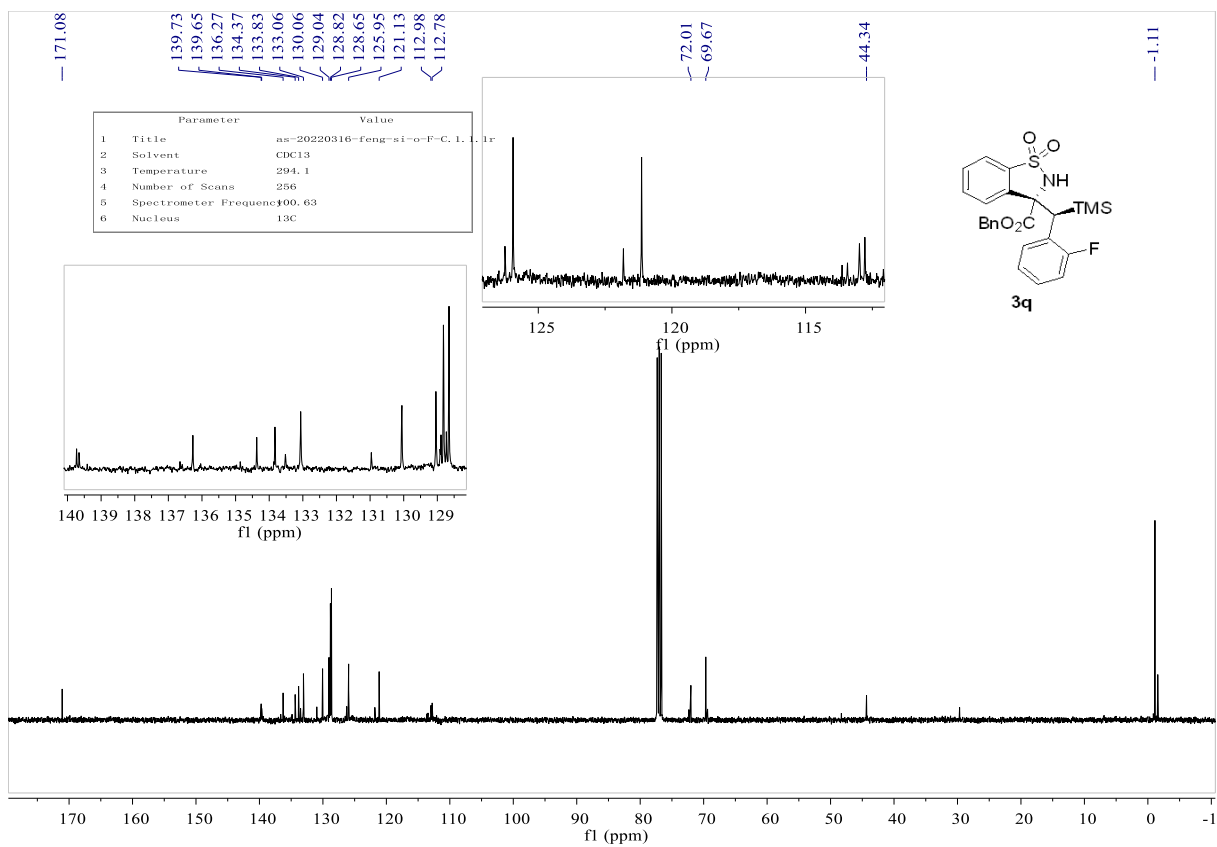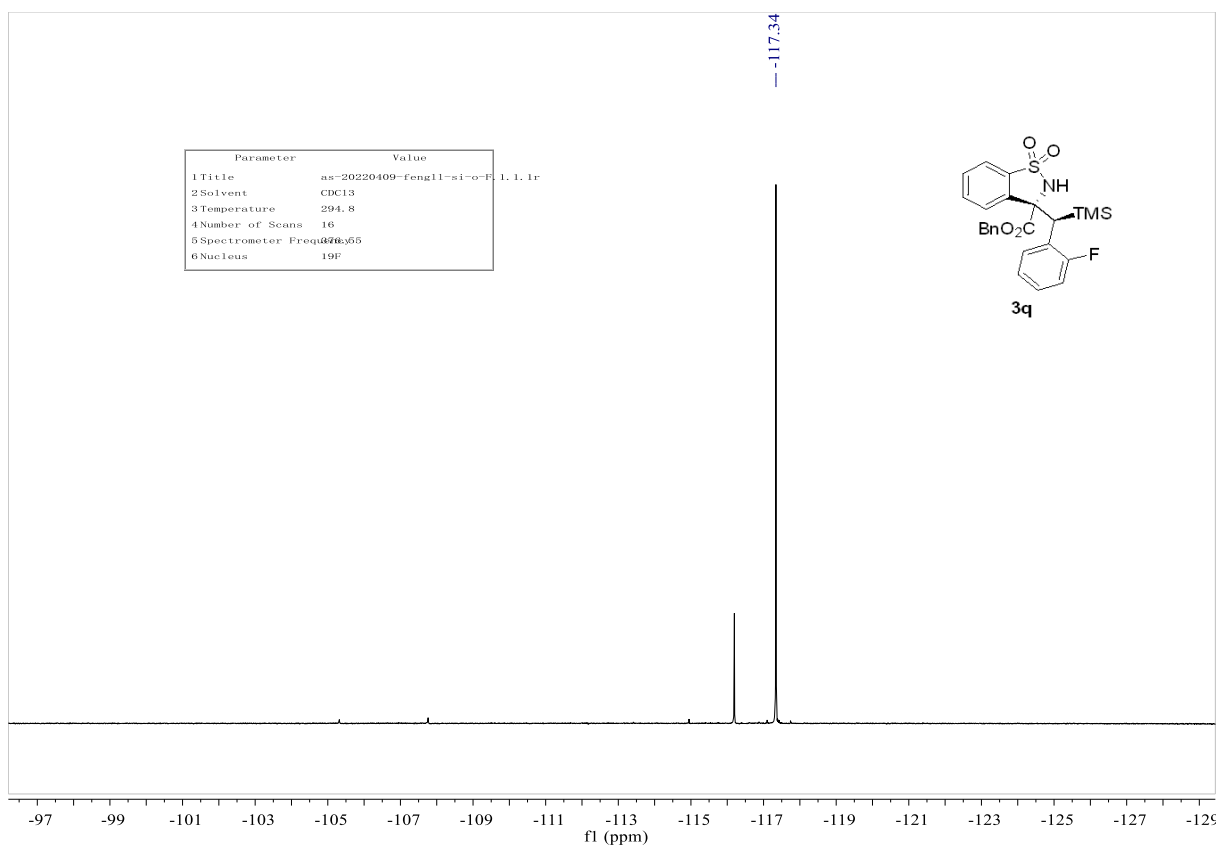

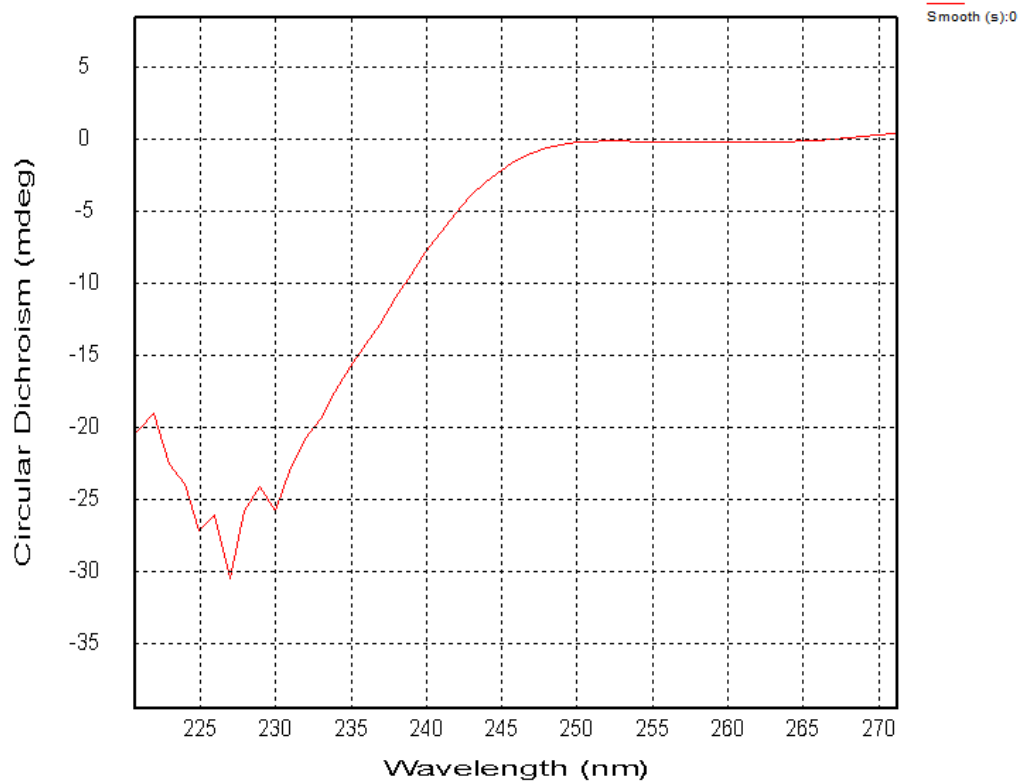

**3r**

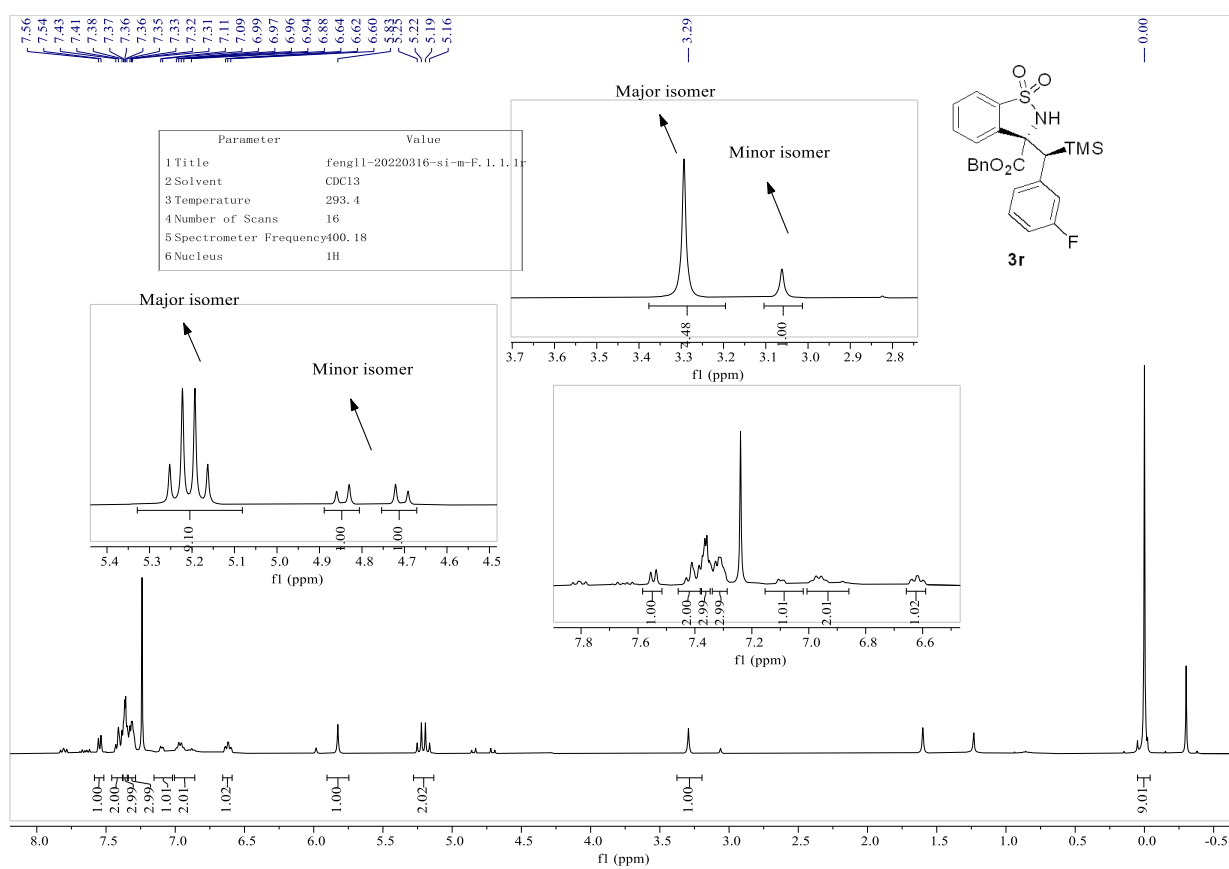

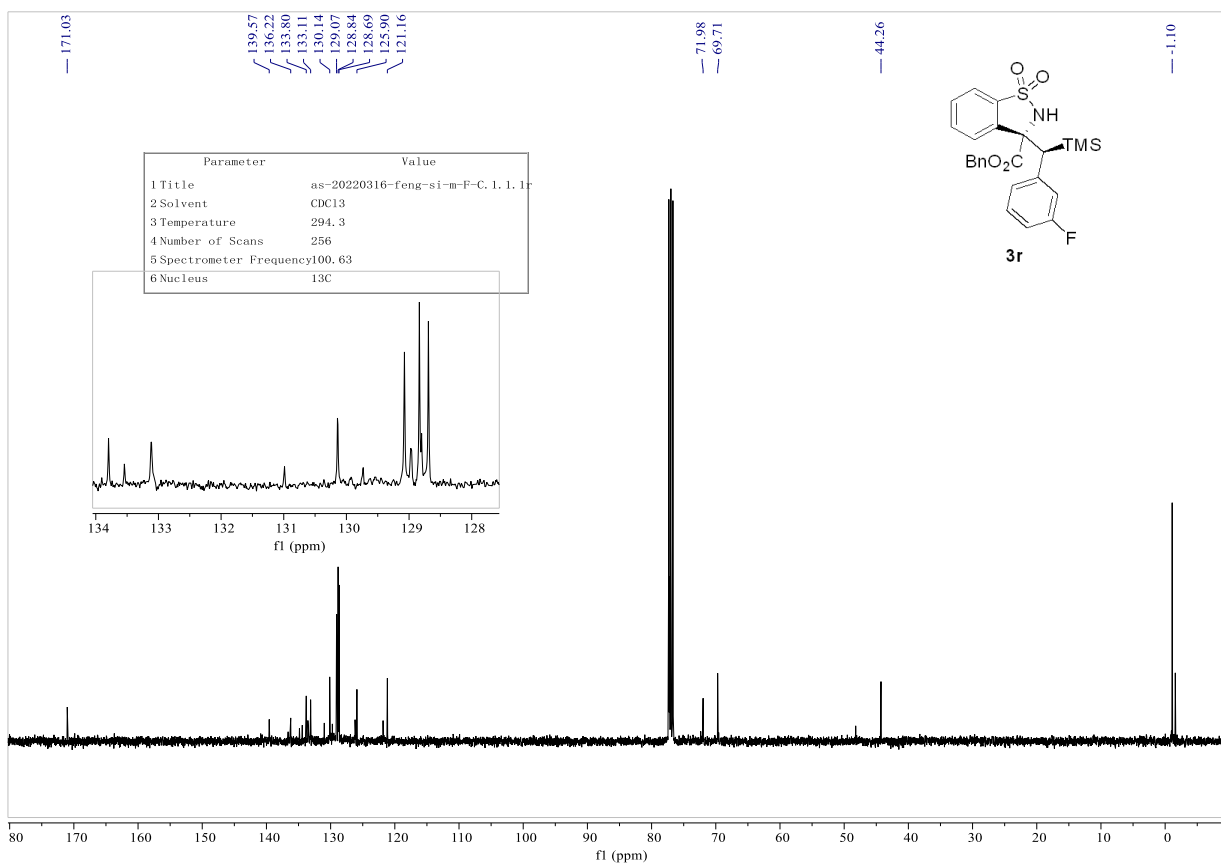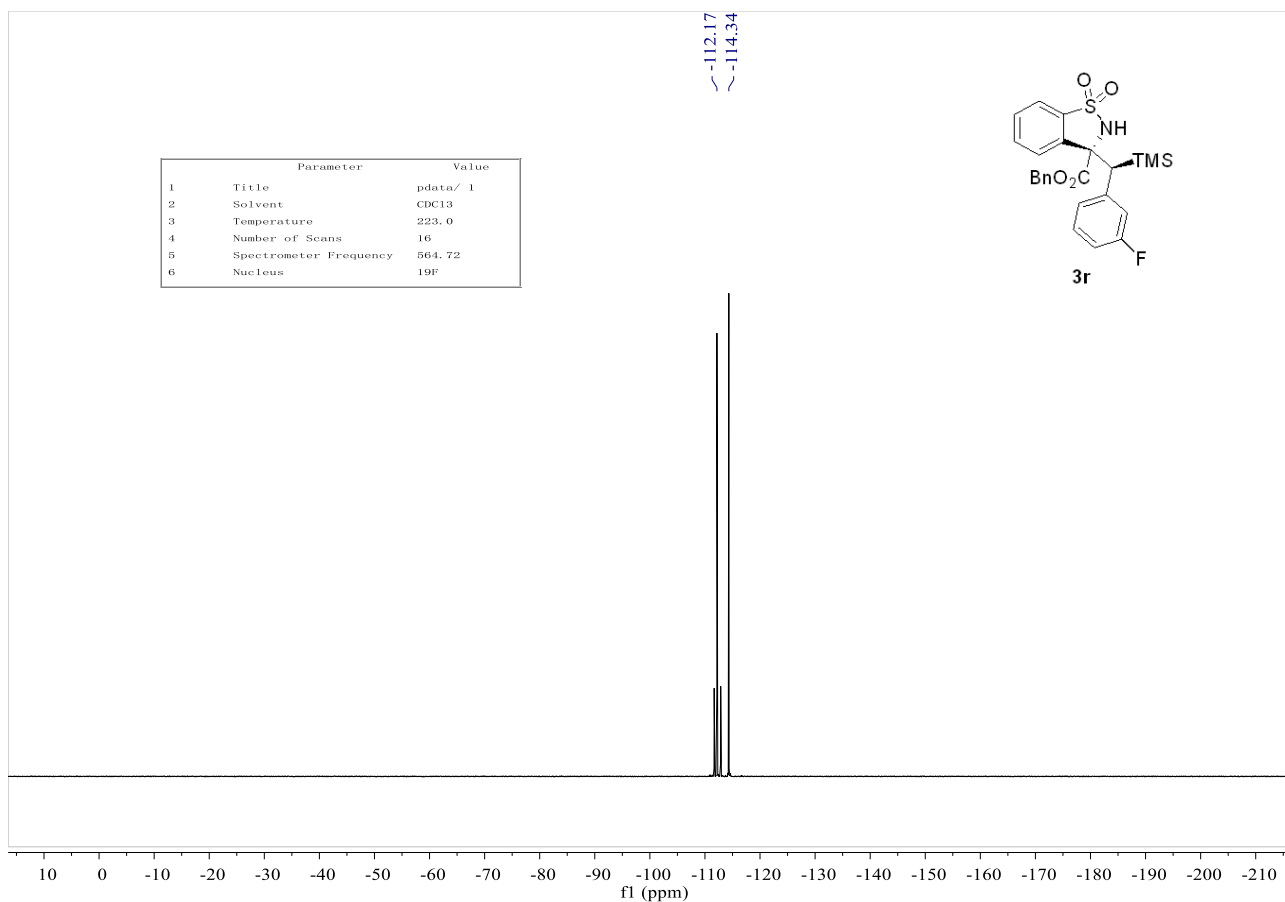

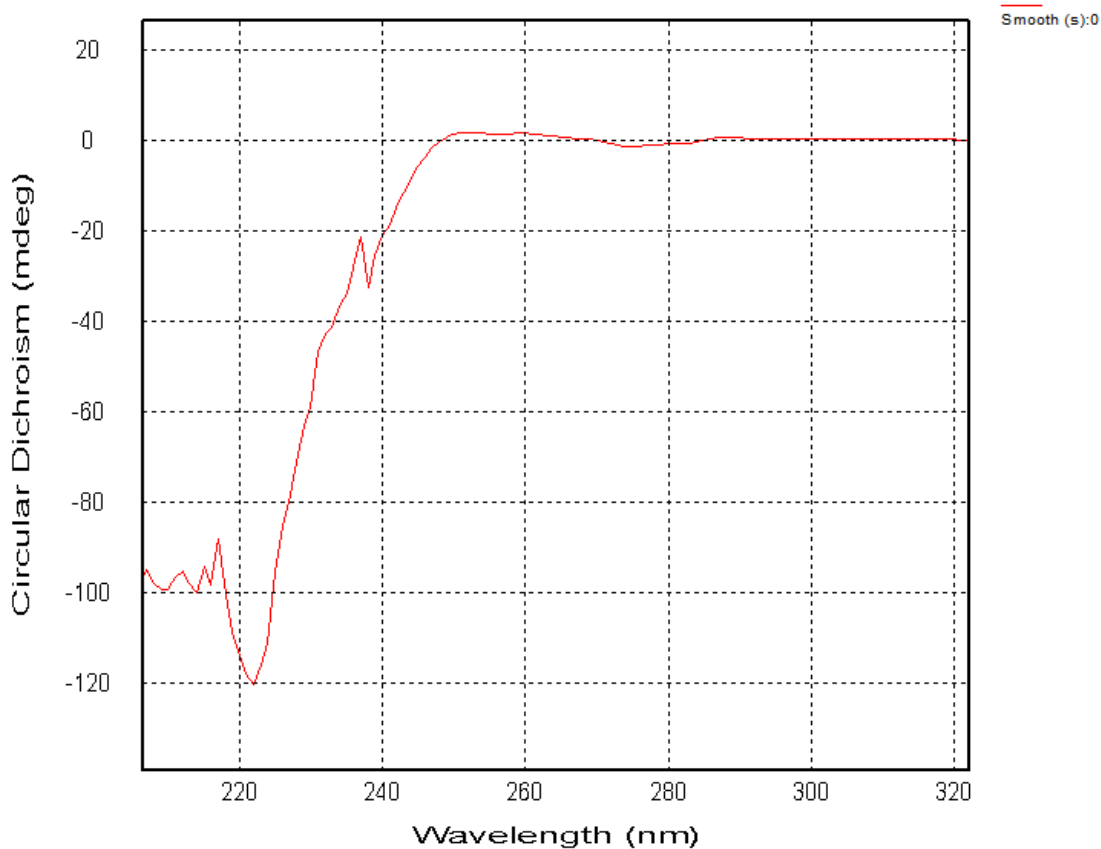

**3s**

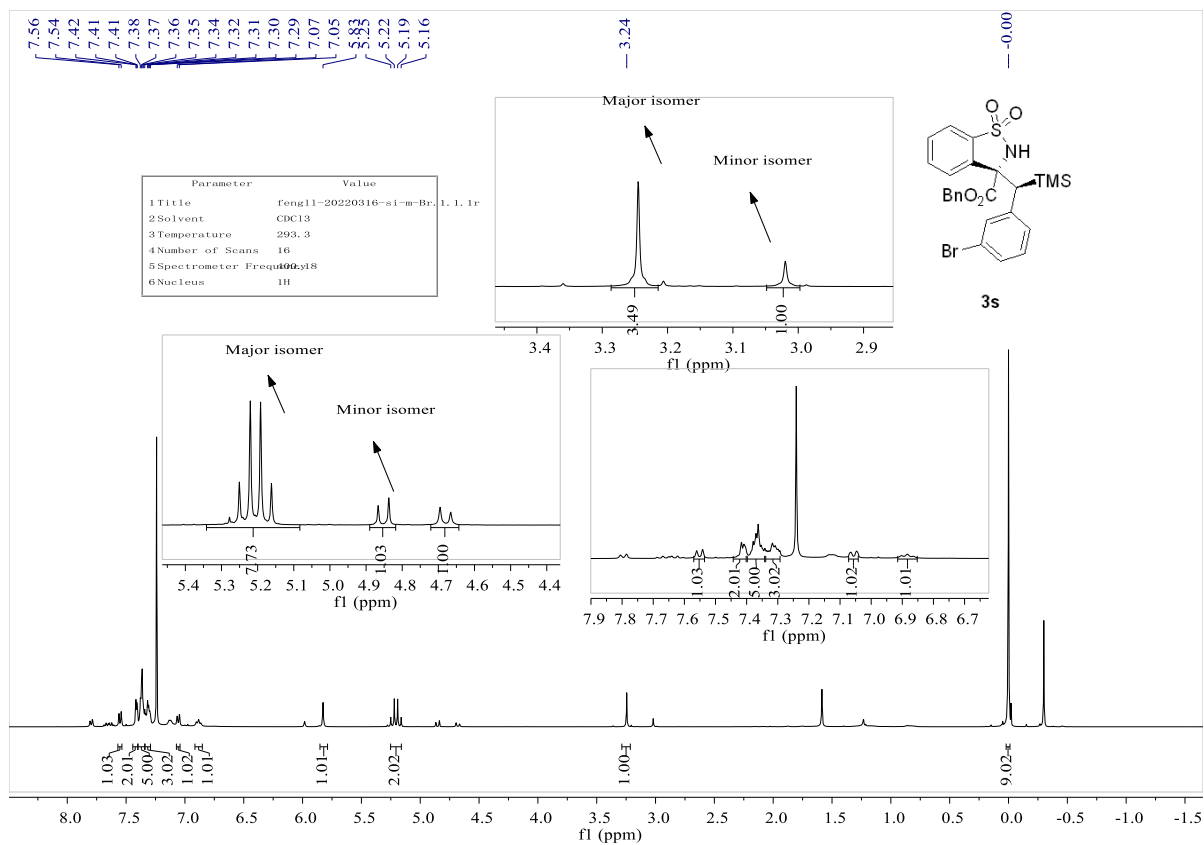

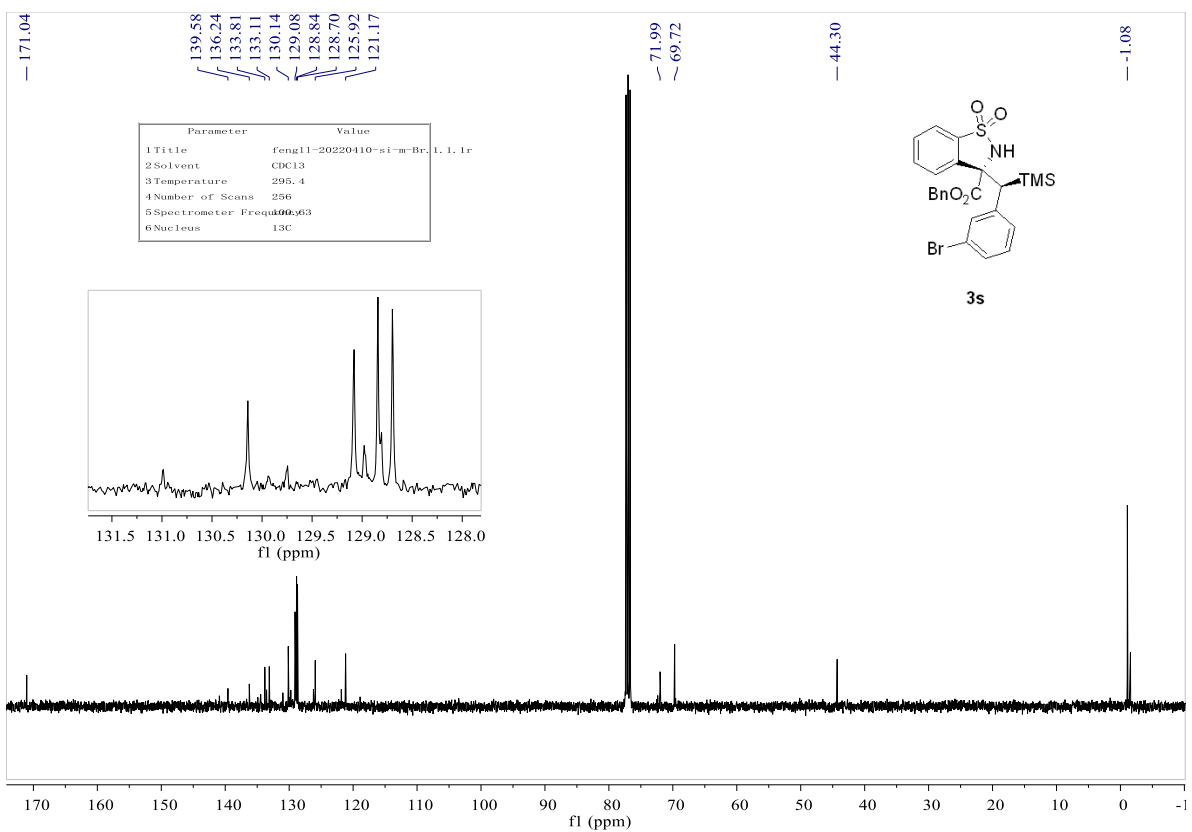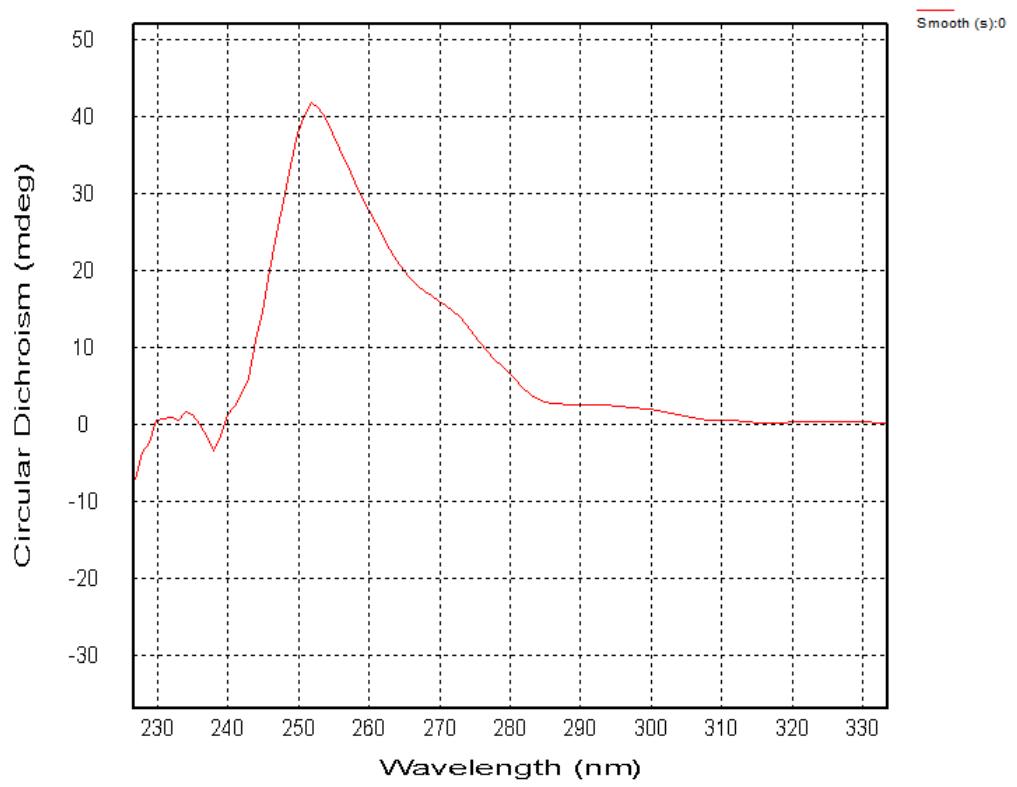

**3t**

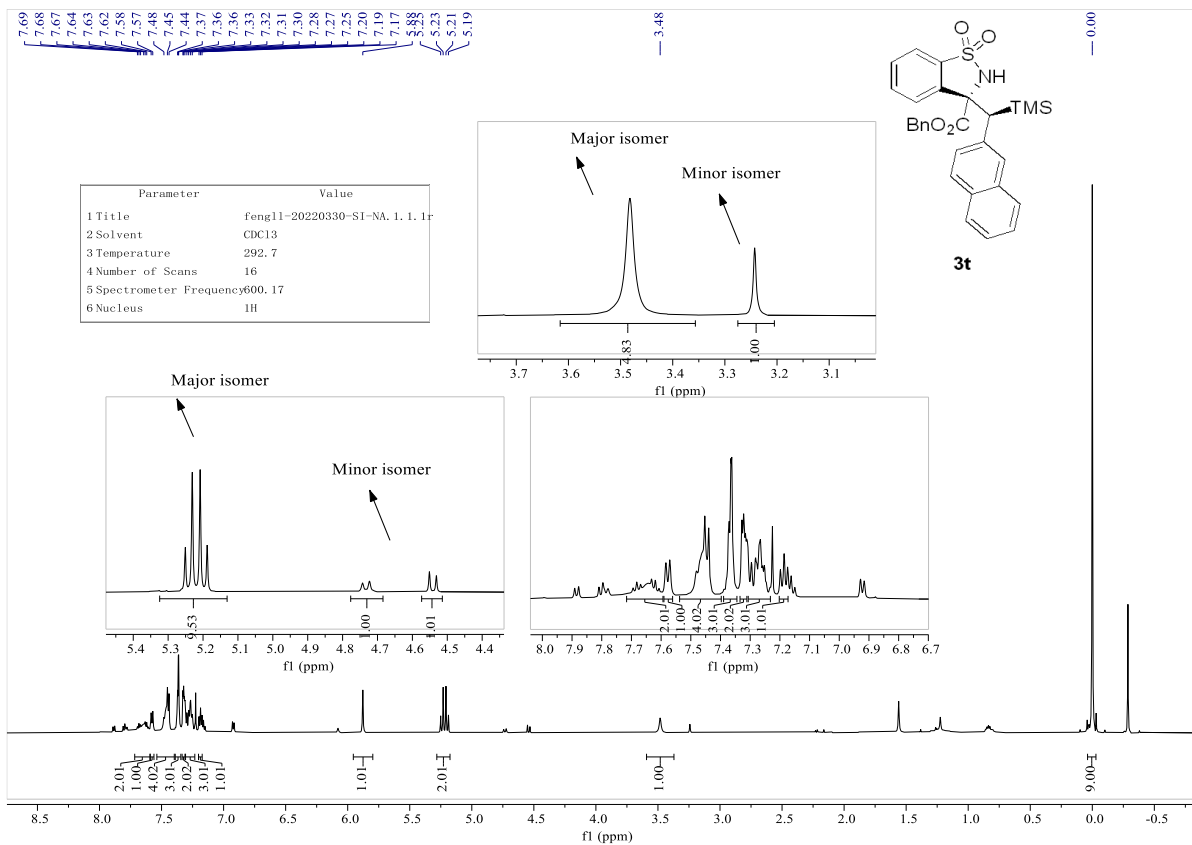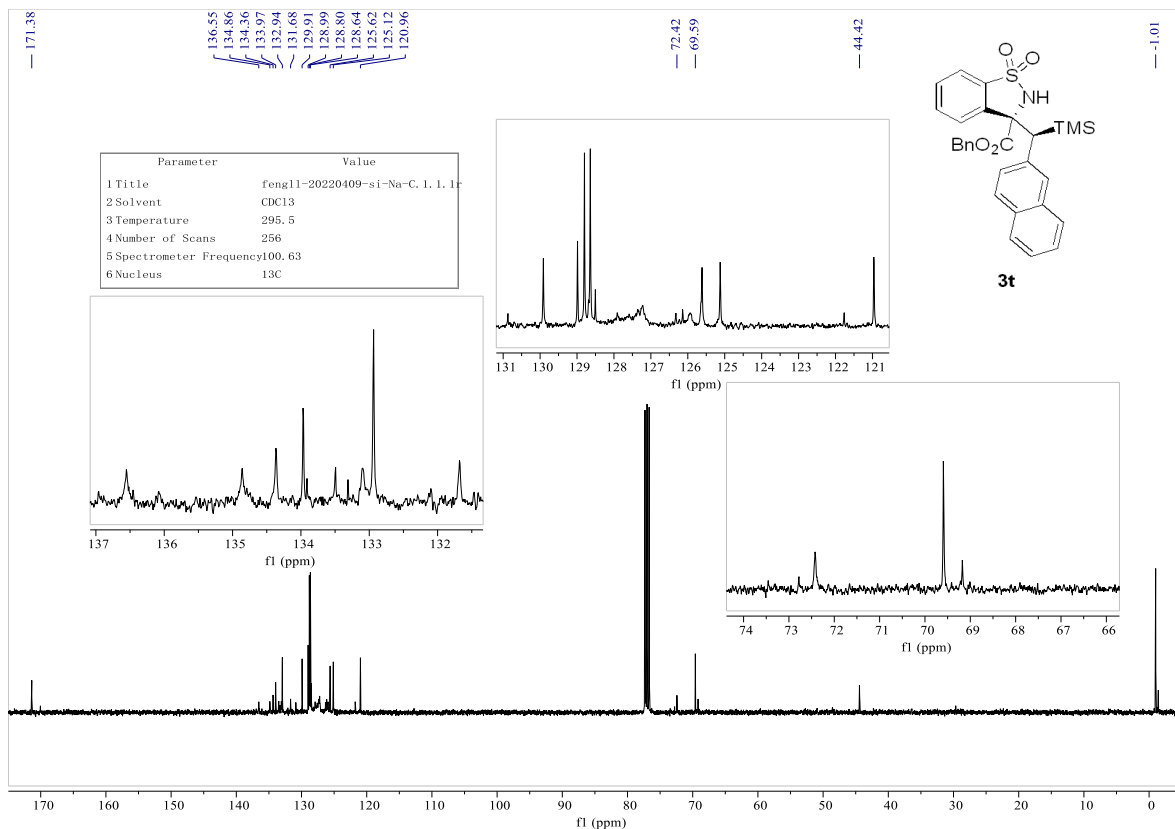

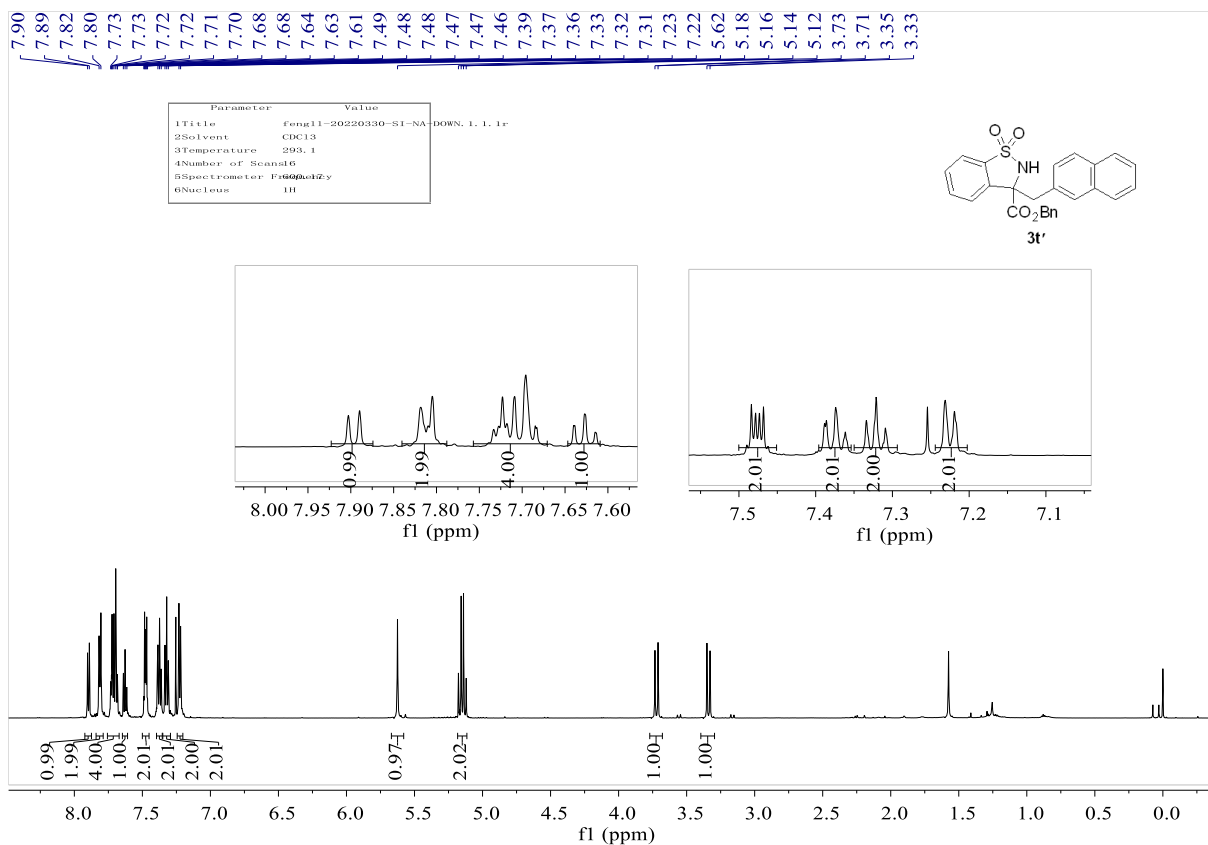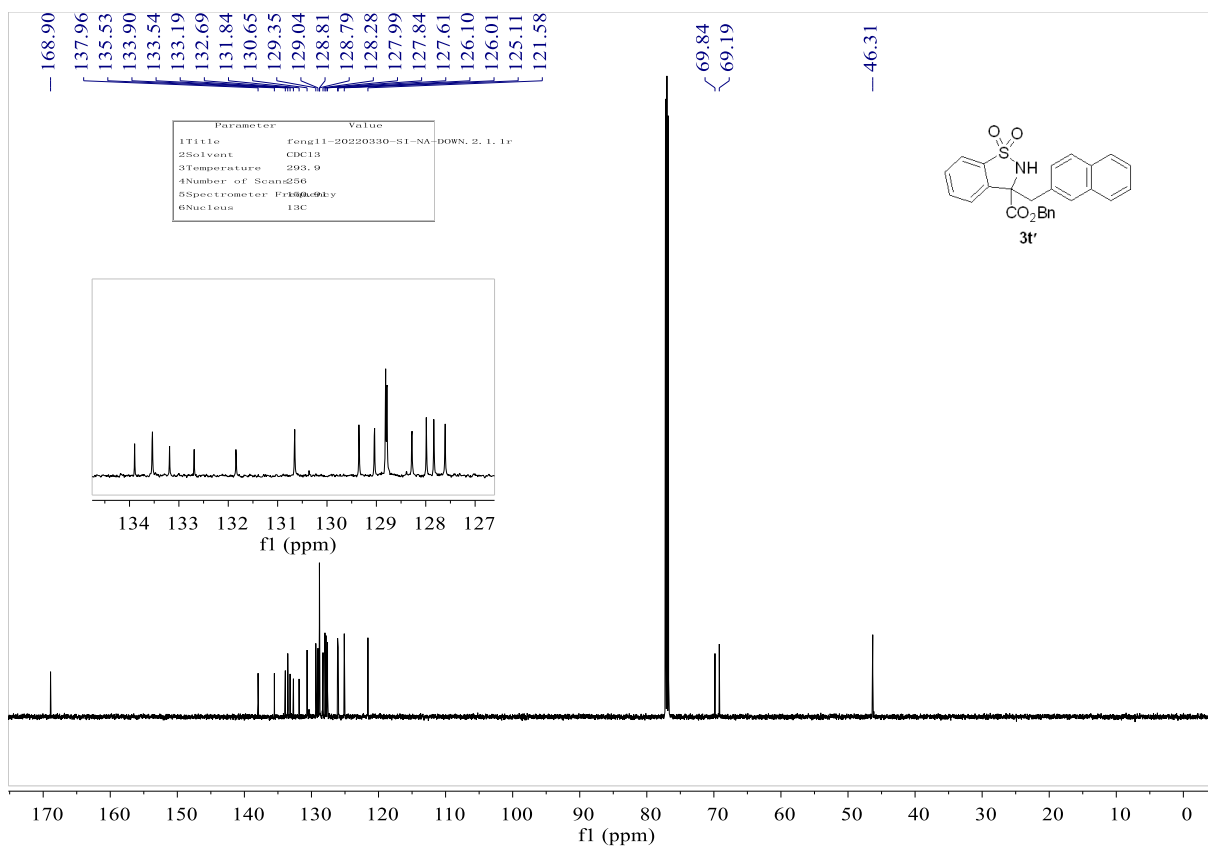



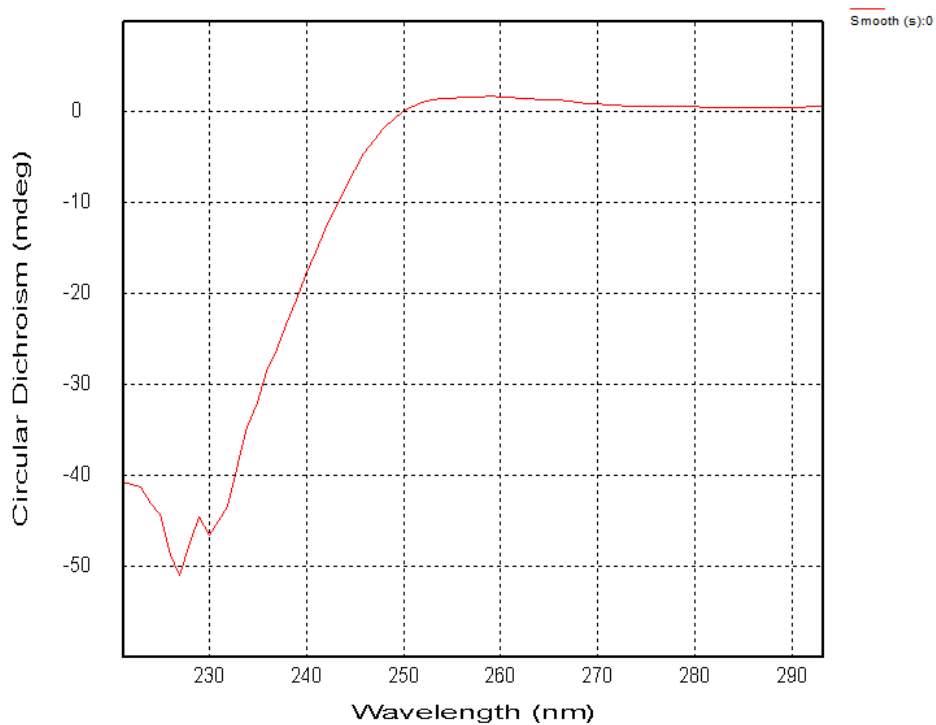

**3u**

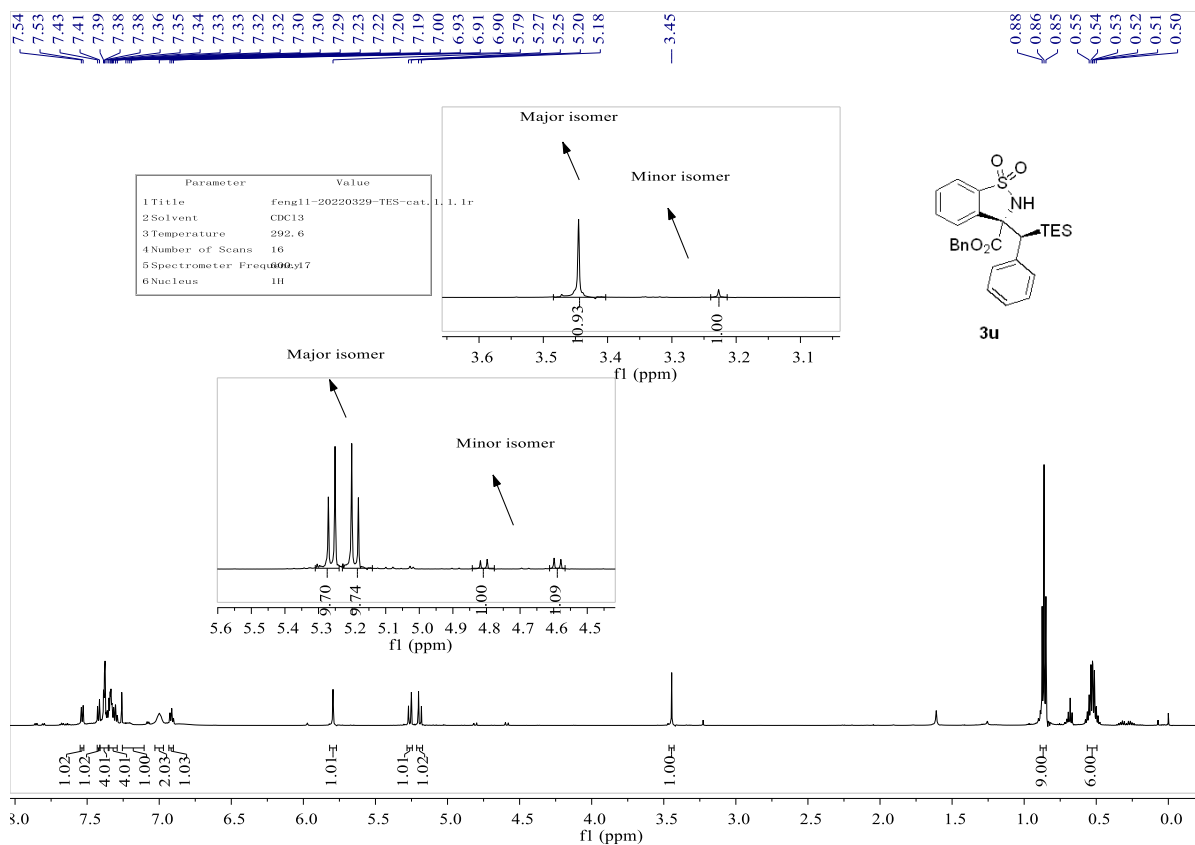

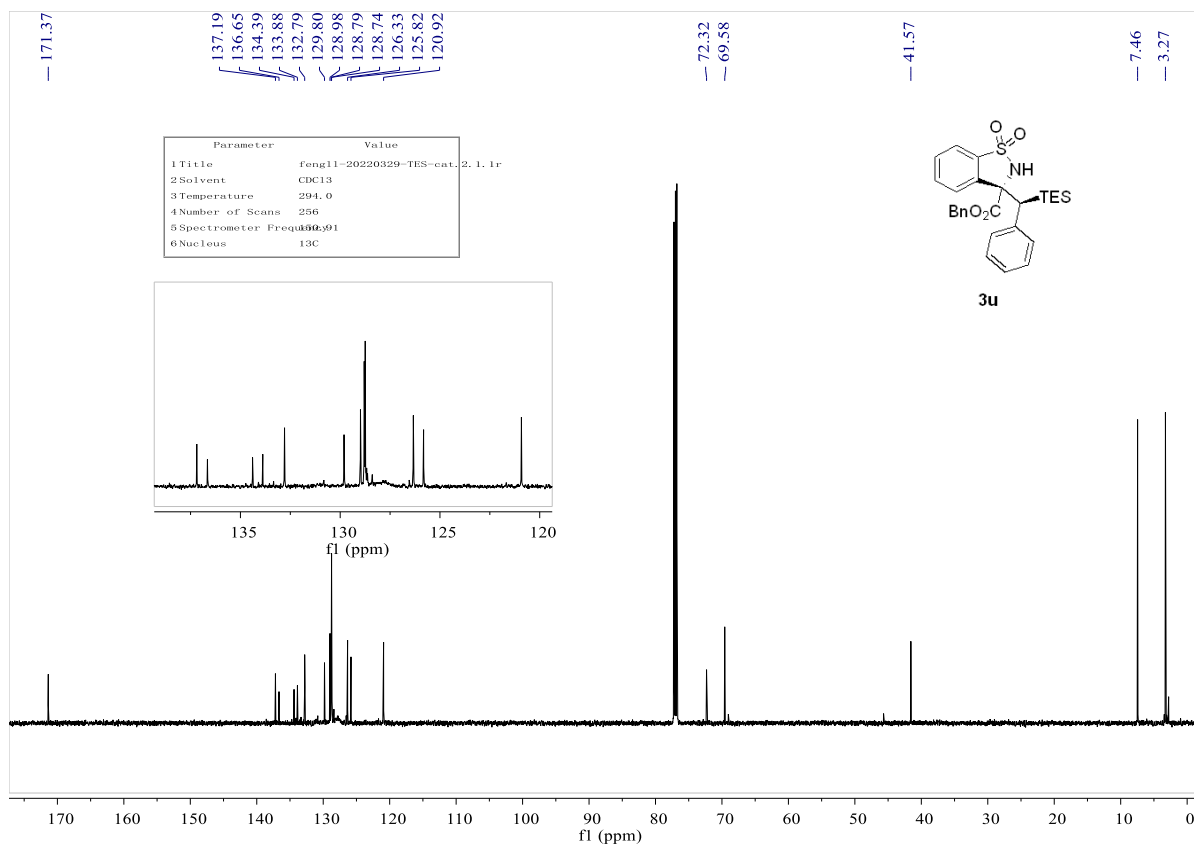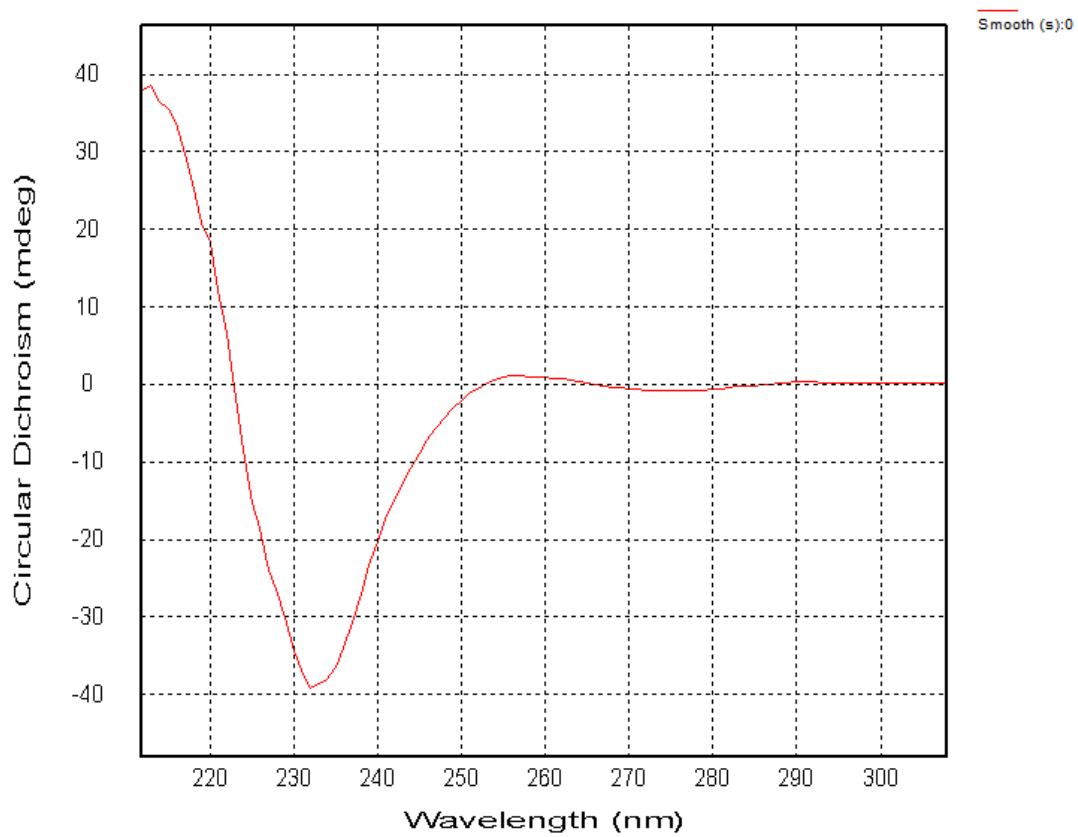

**3v**

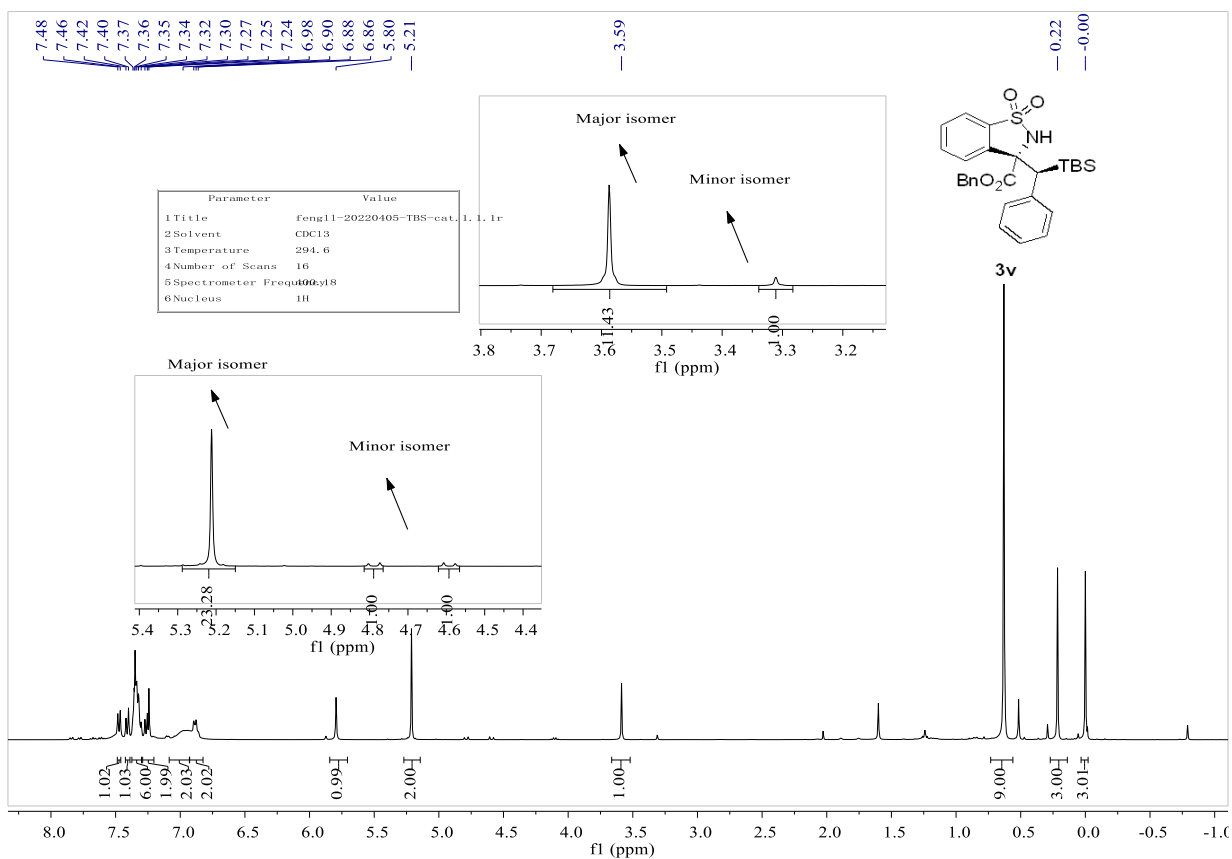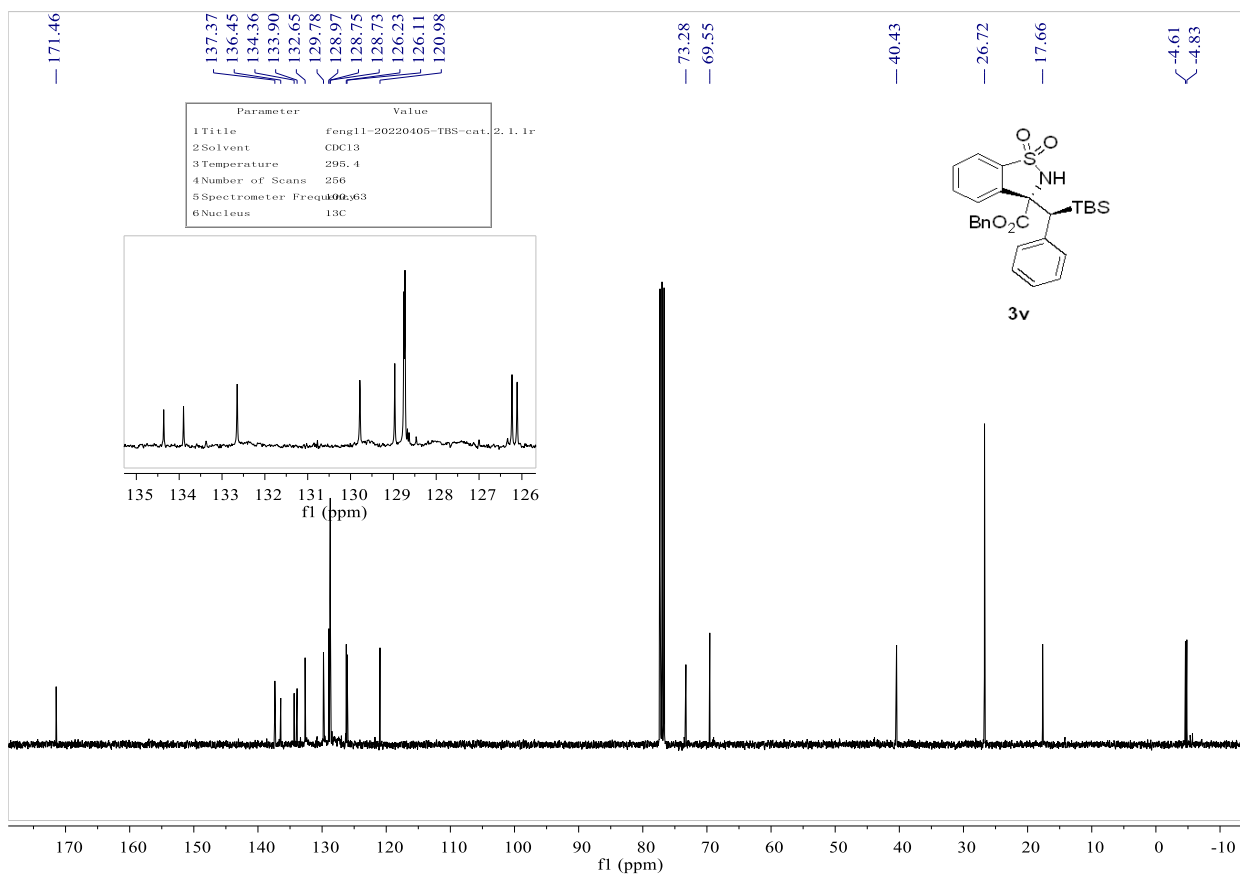

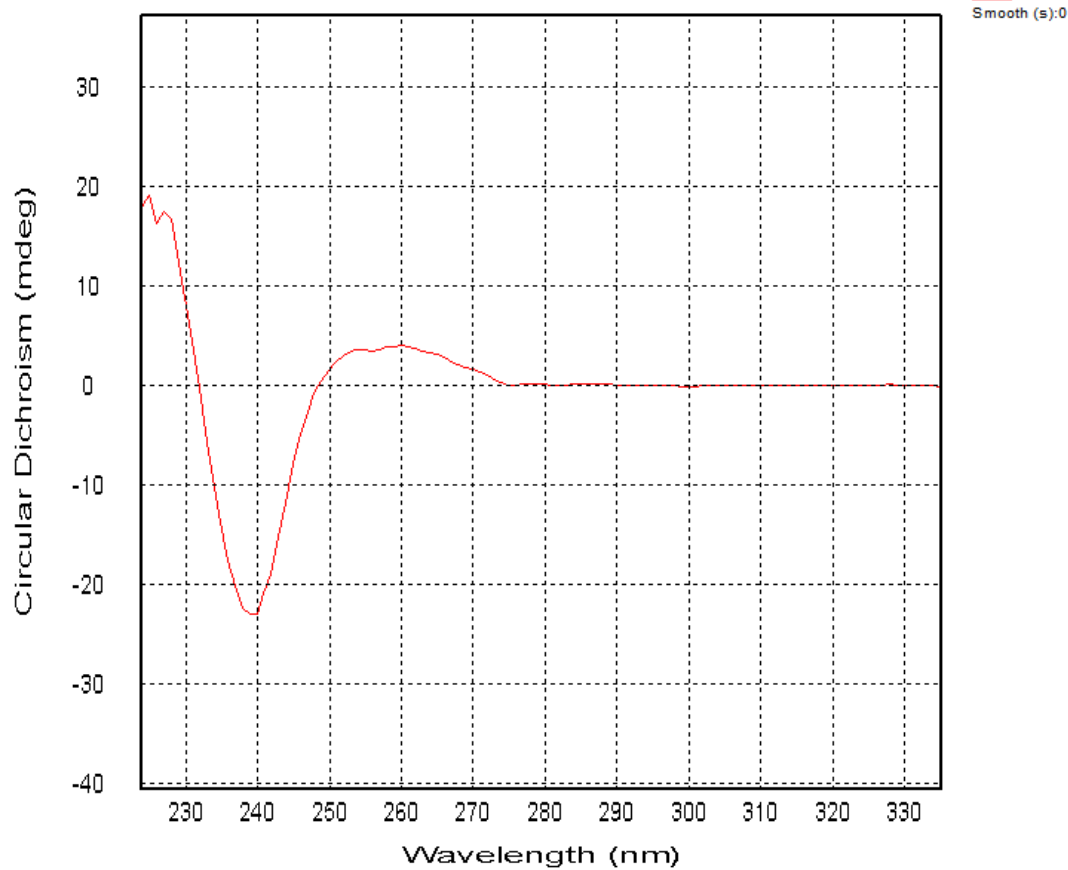

### 3w

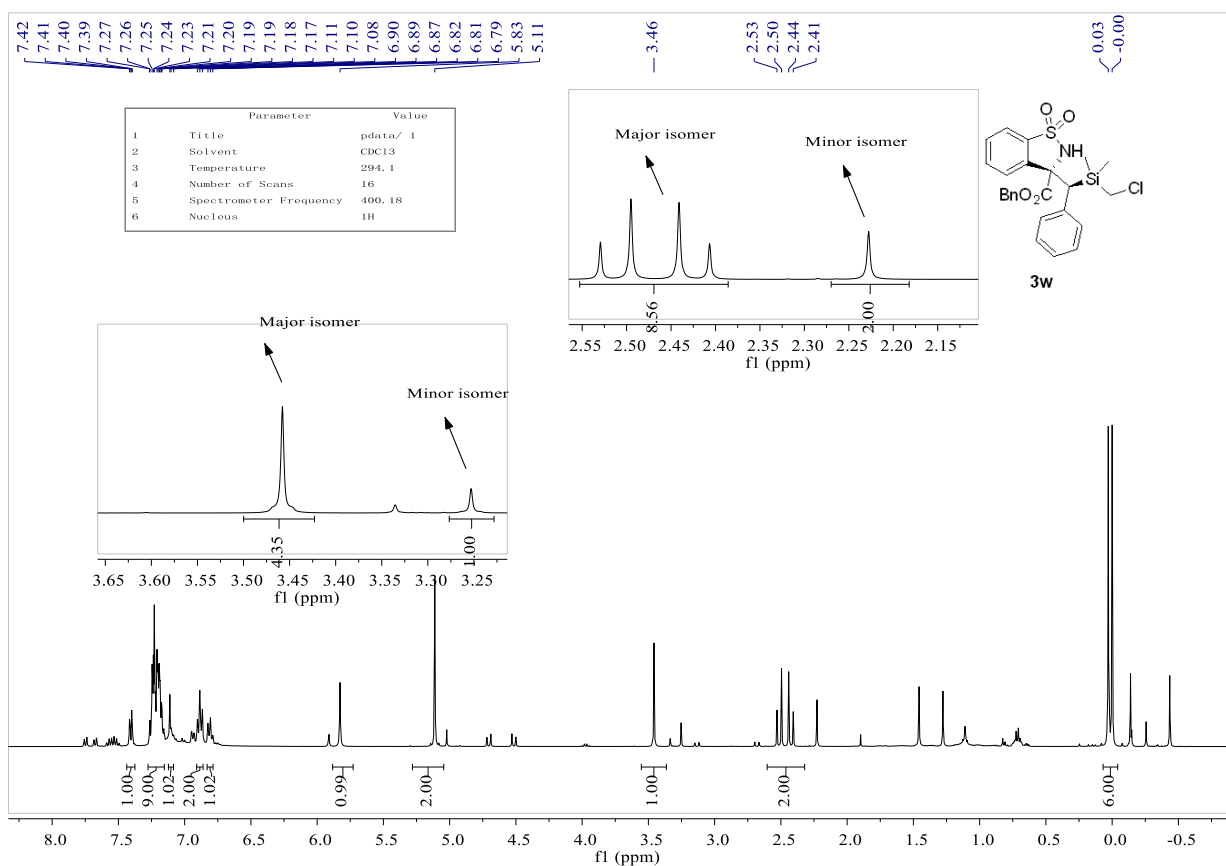

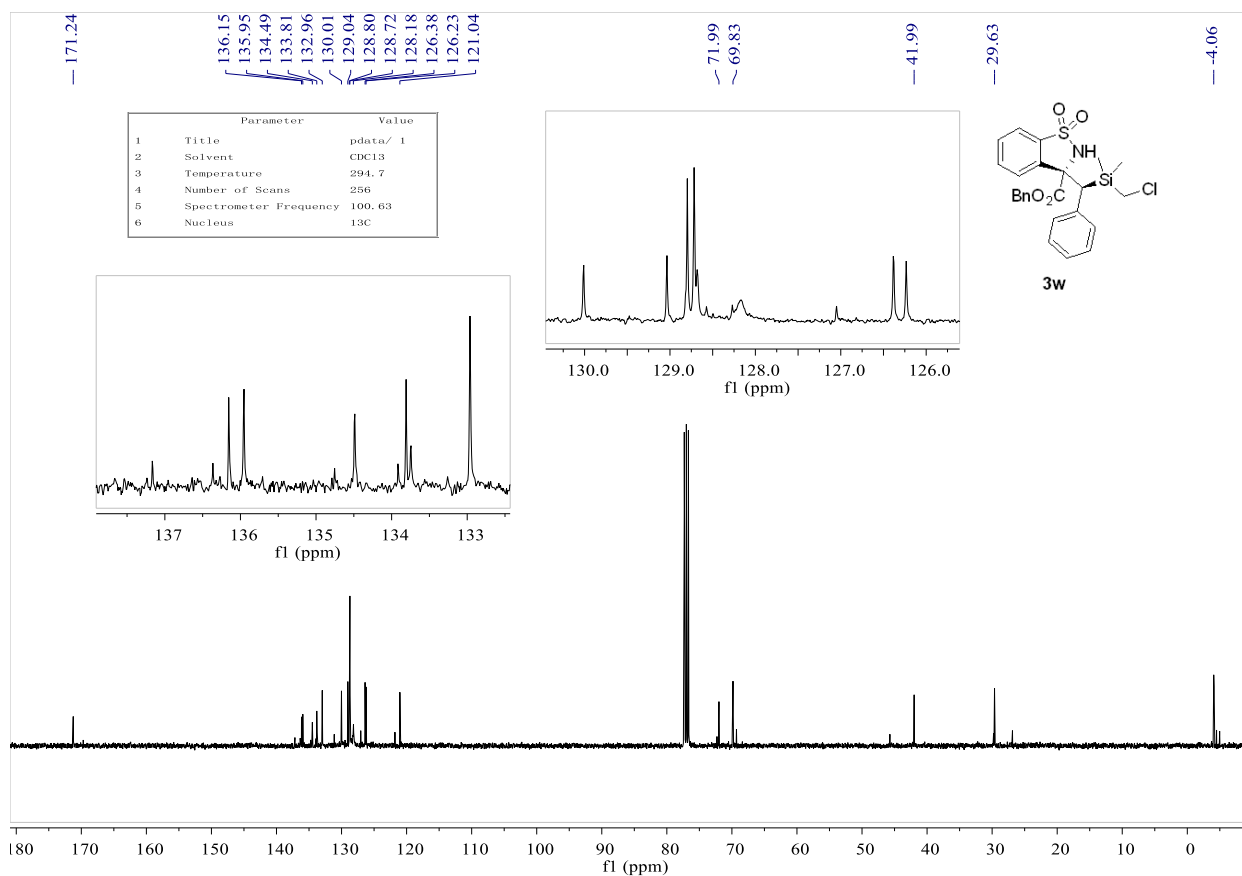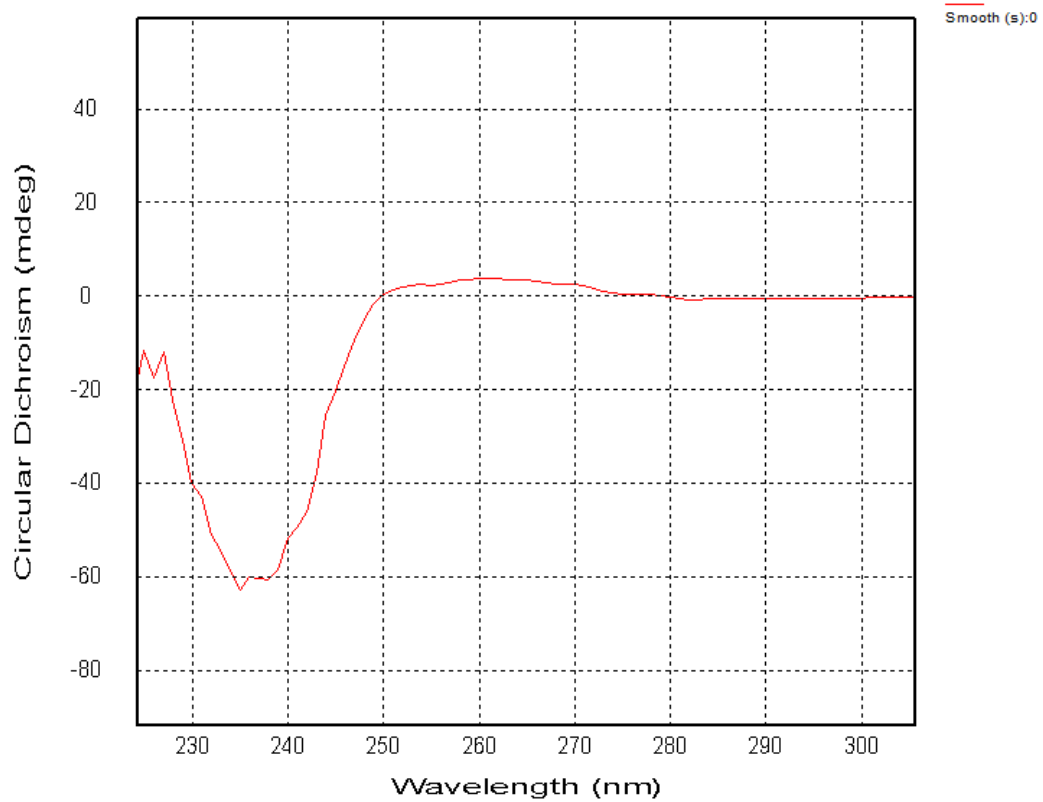

**3x**

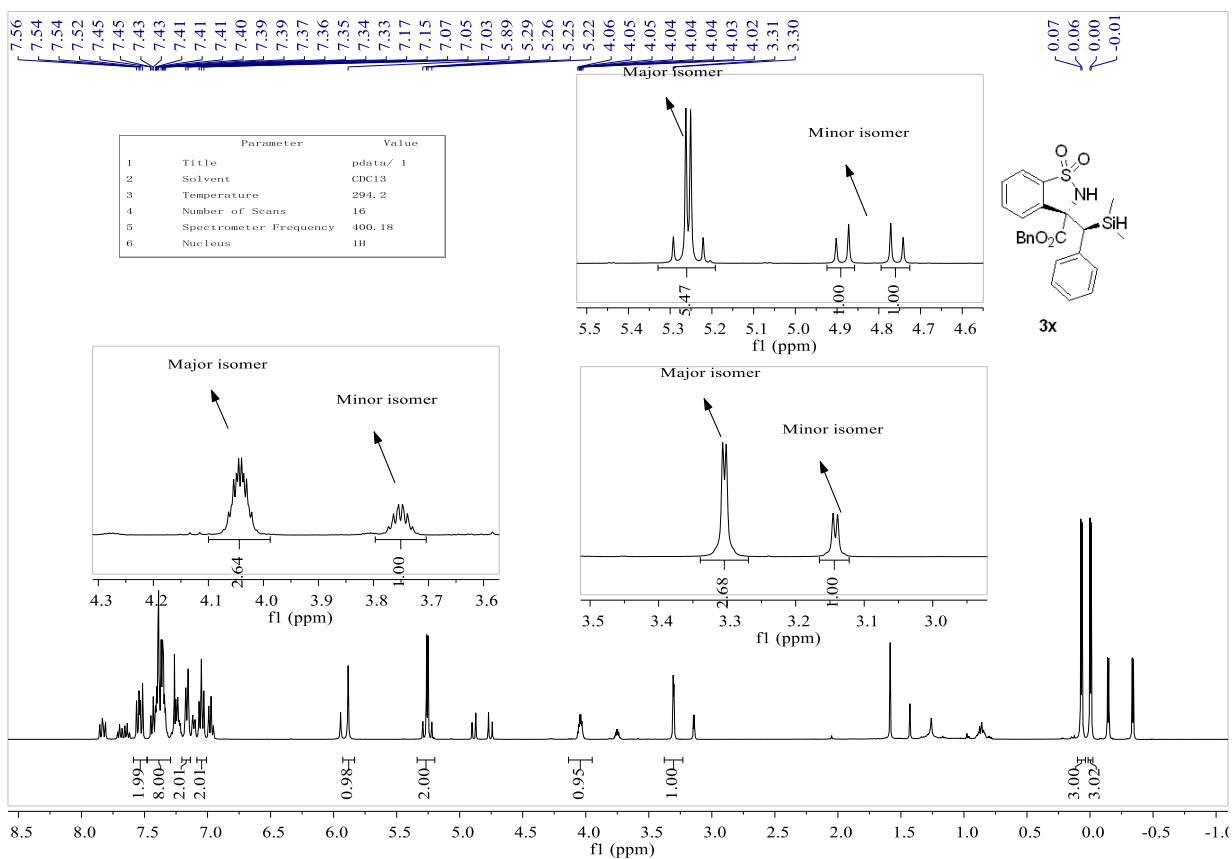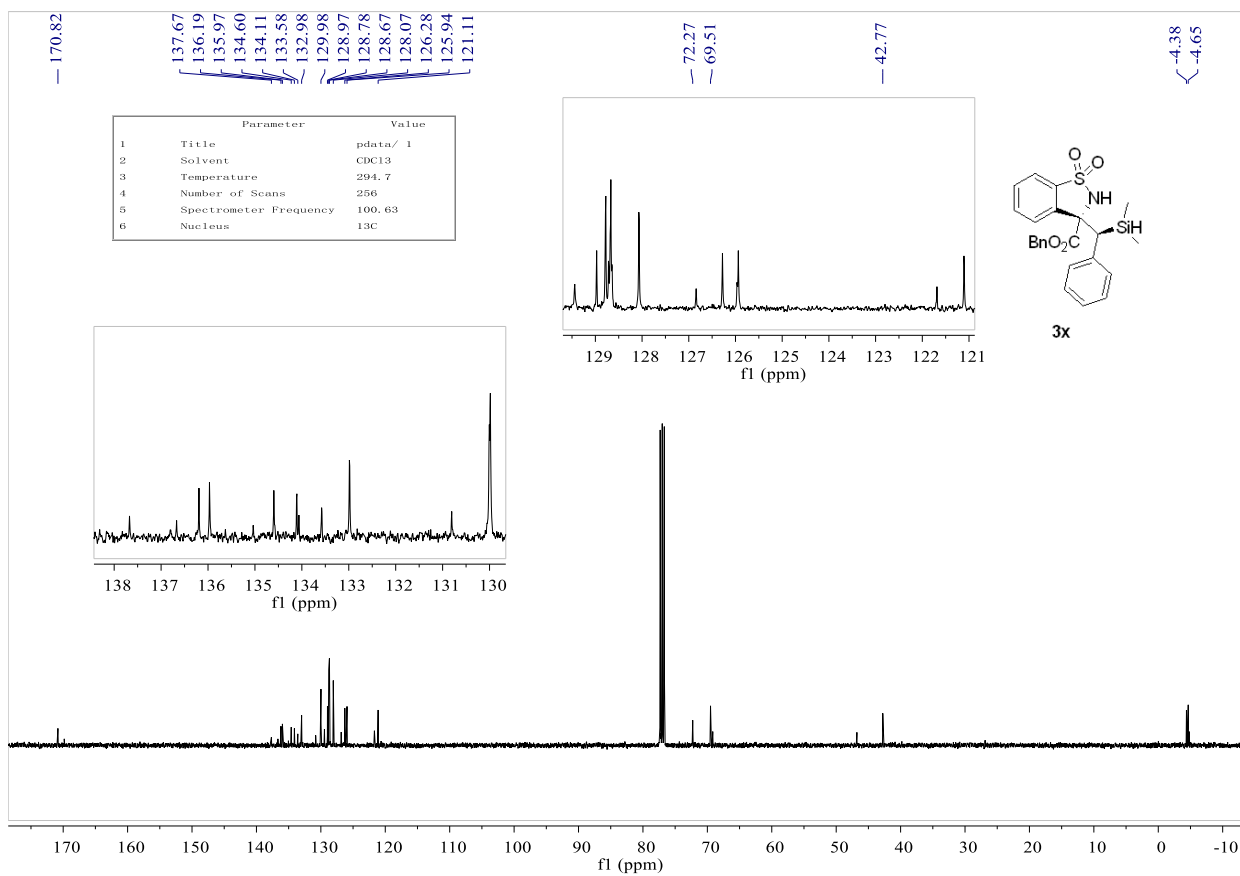

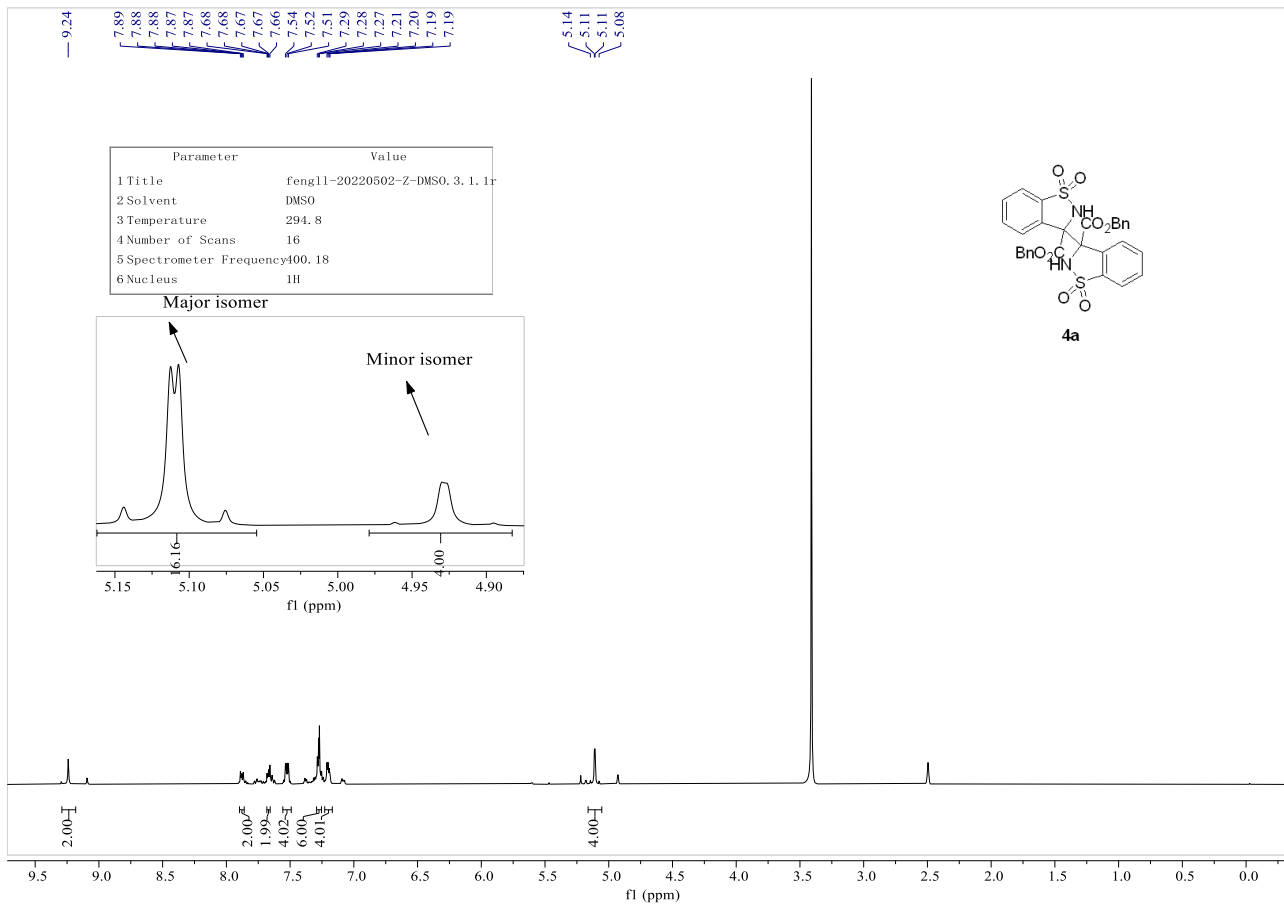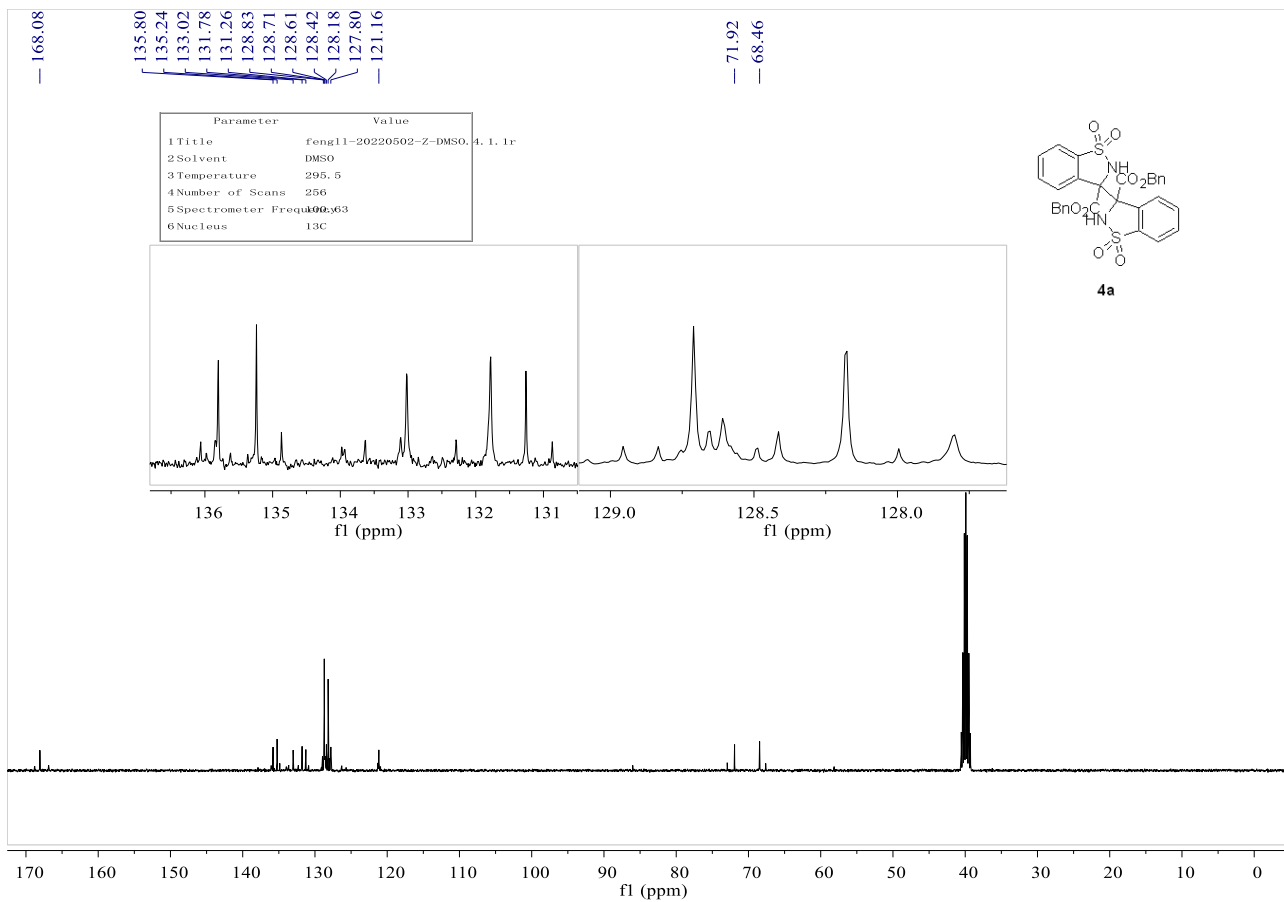

Supplement: d3sc00919j1.pdf [file d3sc00919j1.pdf]
